# Supplementary material
Source: publisher site journal article supplement (https://www.dovepress.com/get_supplementary_file.php?f=358942.xlsx)
Supplement: Supplementary file 1 [file get_supplementary_file.php]

## Sheet: Suppl. Table 1
Suppl. Table 1 Complete gene list identified by RNA-Seq
Gene ID	Gene Symbol	Type	SMIR1 Read Count	SMIR2 Read Count	SMIR3 Read Count	SMIR4 Read Count	Sham1 Read Count	Sham2 Read Count	Sham3 Read Count	Sham4 Read Count	log2 (SMIR_SCDH / Con_SCDH)	Pvalue(SMIR_SCDH / Con_SCDH)	Qvalue (SMIR_SCDH / Con_SCDH)
100034253	Gnl3l	mRNA	655	705	749	530	514	556	521	656	0.21141	3.16e-07	3.2e-06
100036582	Olr1867	mRNA
100036765	Ccdc92	mRNA	5082	6723	4986	5576	5614	6272	5734	6475	-0.127944	1.22e-21	5.28e-20
100049583	Trex1	mRNA	211	215	189	206	180	221	215	198	-0.00822819	0.9082	0.961914
100101439	Vom2r21	mRNA	0	0	0	1	1	1	0	0	-1.02058	0.551931	0.721057
100124593	Cxcr6	mRNA	0	0	1	0	1	1	0	1	-1.60554	0.300359	0.487321
100125361	Zfp867	mRNA	33	41.92	54	46	42	45	52	41	-0.0618833	0.686188	0.818635
100125362	LOC100125362	mRNA	1372	1849	1812	1349	1133	1425	1547	1466	0.175491	3.09e-11	5.42e-10
100125363	Fbxl13	mRNA	2	2	4	1	2	5	6	5	-1.02058	0.0743251	0.173291
100125364	LOC100125364	mRNA	392	342	376	402	388	380	367	308	0.0468052	0.37794	0.565999
100125367	LOC100125367	mRNA	78	97	83	71	86	89	78	83	-0.0509553	0.648824	0.79127
100125368	LOC100125368	mRNA	88.52	104.07	73.01	68.04	67.86	74.86	88.47	81.43	0.0733006	0.518505	0.693967
100125370	Nadk	mRNA	1083	946	1042	949	1059	889	1012	881	0.0451319	0.165535	0.317152
100125372	Ces1f	mRNA	2	1	2.74	3	1	1	2	0	1.10705	0.187035	0.346705
100125373	Pnrc2	mRNA	726	641	663	709	795	684	710	712	-0.103483	0.00708237	0.0258928
100125374	Adat3	mRNA	69.27	78.61	106.82	48.54	79.48	62.31	73.3	68.78	0.0746481	0.530854	0.705136
100125378	Nudcd3	mRNA	248	276	263	218	212	242	180	271	0.130624	0.0480212	0.123007
100125384	LOC100125384	mRNA	0	0	1	0	0	0	0	0
100125385	Mroh1	mRNA	180	209	198	135	111	161	130	182	0.285449	0.000364	0.00196889
100125595	Rs1	mRNA
100126191	Rab1b	mRNA
100126231	Mln	mRNA
100134827	Hiatl3	mRNA	762.02	692.96	587.76	866.03	721.55	614.14	664.36	702.63	0.0854369	0.0265948	0.0769939
100134871	LOC100134871	mRNA	34.43	131.54	33.56	63.3	124.35	148.35	69.4	107.75	-0.795896	4.7e-13	9.73e-12
100137086	Jmjd7	mRNA	39	49	33	30	42	40	22	33	0.119791	0.481339	0.663517
100145871	Adh5	mRNA	715	644	677	798	655	692	700	632	0.0605636	0.11918	0.247858
100147704	Usp43	mRNA	20	17	19	15	15	23	16	20	-0.0802879	0.7376	0.853136
100151767	Nkapd1	mRNA	506	447	525	469	489	475	409	492	0.0414956	0.374626	0.563245
100158223	Zfp786	mRNA	56.15	61.87	86.89	47.27	52.35	65.69	57.97	66.73	0.0344604	0.79049	0.889325
100158225	Tedc2	mRNA	101.6	100.5	88.75	121.99	113.35	111.26	118.89	109.69	-0.155115	0.113833	0.239126
100158232	Zfp9	mRNA	294.11	305.67	362.01	254.69	217.27	255.29	270.03	267	0.248361	5.07e-05	0.000337
100158233	Slc35a2	mRNA	489	460	503	509	578	485	576	465	-0.122127	0.00697933	0.0255774
100169711	Paep	mRNA
100169747	Phykpl	mRNA	71.9	39.61	47.72	51.77	34.42	34.13	53.47	47.65	0.29393	0.0475157	0.122088
100174909	Smim11a	mRNA	125	120	130	144	141	142	145	125	-0.112127	0.20336	0.368904
100174910	LOC100174910	mRNA	124	118	127	121	134	123	158	163	-0.258869	0.003422	0.0139842
100188932	Ost4	mRNA	1099	1068	1017	1548	1300	1166	1226	1038.8	-0.0202157	0.495506	0.674318
100188933	Fam229b	mRNA	66	61	50	67	65	88	84	59	-0.299298	0.0161785	0.0513674
100188934	Ctxn3	mRNA	86	97	60	101	68	79	82	68	0.191364	0.0935629	0.206515
100188936	Ormdl1	mRNA	102.01	78.02	96.02	87	97	96	115.05	89.87	-0.152892	0.144023	0.286358
100188937	Cox7c	mRNA	1327	1521	1426	1885	1643	1904	1621	1568	-0.149778	3.82e-09	5.21e-08
100188944	Pnkd	mRNA	5704	7506	6394	5582	5401	6524	6496	6359	0.00286421	0.824368	0.911211
100188984	Zfp951	mRNA	18.24	2.38	7.76	17.68	5.58	7.76	7.68	10.27	0.537231	0.104716	0.224532
100189544	Nrn1l	mRNA	39	46	41	58	70	47	49	56	-0.291436	0.0422826	0.111343
100190895	Rhox3	mRNA
100190936	Rnf123	mRNA	1731	2238	2148	1502	1576	1858	1726	1819	0.106	9.13e-06	7.07e-05
100192205	Hsbp1l1	mRNA	34.02	34.24	51.16	56.82	29.91	47.28	42.08	36.34	0.159025	0.315842	0.501276
100192313	Atxn7l3b	mRNA	2918	2956	3066	2781	2391	2728	2781	2738	0.119287	6.46e-10	9.66e-09
100192314	Inafm1	mRNA	479	640	624	554	520	527	779	572	-0.0826624	0.0496651	0.12595
100196907	Tmem59	mRNA	3751	3665	3806	3976	3743	3928	3990	3690	-0.0350328	0.0338065	0.0935835
100216475	Hexd	mRNA	266	273	237	181	217	235	264	223	0.00681215	0.918121	0.968056
100233176	Gon7	mRNA	580.86	805.55	548.52	743.5	625.87	722.47	647.28	575.34	0.0384988	0.333723	0.520589
100233177	Zfp949	mRNA	133	131	118	96	105	118	142	108	-0.00541118	0.953881	0.990933
100233213	Insyn2a	mRNA	207.24	242.02	226.31	192.86	211.14	213.18	220.44	230.23	-0.0314386	0.649143	0.791448
100270669	Riiad1	mRNA	24.56	24.96	26.27	16.15	17.8	14.43	27.39	22.87	0.135892	0.534228	0.707976
100270678	Spns2	mRNA	1262	1352	1336	1252	1194	1260	1195	1283	0.056312	0.0494827	0.12561
100270683	Tas1r2	mRNA
100271845	LOC100271845	mRNA
100294508	LOC100294508	mRNA	2134	2176	2283	1930	2155	2015	2071	2144	0.00296893	0.893558	0.952906
100301568	Abo	mRNA	104	82	100	147	140	112	117	123	-0.204873	0.0309805	0.0870761
100302372	LOC100302372	mRNA	45	26.44	39.04	44	33.52	51.12	44.39	55	-0.273103	0.0821878	0.187087
100302373	Ctxn2	mRNA	140	235	226	241	149	201	231	165	0.154063	0.033517	0.0929645
100302405	Zfp958	mRNA	787.01	798.87	748.02	590.73	676.99	737	816.29	706.01	-0.026322	0.48492	0.665997
100302447	Cox16	mRNA	255	222	280	289	243	265	230	241	0.0749205	0.242746	0.419737
100302453	Mettl9	mRNA	1025	785	869	895	977	885	1012	842	-0.0767925	0.023072	0.0687172
100302465	LOC100302465	mRNA	122	107	104	124	97	120	124	122	-0.0393996	0.678746	0.812349
100303643	Fcgbp	mRNA	46	33.87	39.68	36	45	31.92	41.73	43	-0.0760767	0.638678	0.785221
100310845	Uty	mRNA	33.28	42.37	31.1	46.41	34.43	28.81	32.08	45.53	0.100298	0.551322	0.722167
100310874	Parpbp	mRNA	11	5	12	8	8	13	9	6	-0.0205816	0.951736	0.989883
100310875	Tas2r110	mRNA
100310876	Tas2r136	mRNA
100310877	Tas2r116	mRNA
100310878	Tas2r106	mRNA
100310879	Tas2r104	mRNA
100310880	Tas2r117	mRNA
100310881	Tas2r129	mRNA
100310885	Tas2r113	mRNA
100310886	Tas2r103	mRNA
100312665	Vom1r9	mRNA
100312671	Vom1r60	mRNA
100312735	Vom1r103	mRNA
100312751	Vom1r64	mRNA
100312945	Vom1r17	mRNA
100312982	Ddx3	mRNA	1010.97	884.16	975.99	916.97	817.98	789.95	865	740.97	0.216564	3.61e-10	5.59e-09
100312983	Kdm5d	mRNA	349.83	373	420	371	319	368	375	354	0.0758003	0.155143	0.302331
100312984	Eif2s3y	mRNA	617	651.01	634	747	755	727	705	623	-0.105698	0.00680821	0.0250505
100322884	Nemf	mRNA	800.07	805	825	683	716.05	740	866	730	0.0079778	0.828132	0.913499
100322897	Prr30	mRNA
100328908	Zfp831	mRNA	22	27	20	14	11	26	12	18	0.288369	0.22226	0.393982
100359421	LOC100359421	mRNA	2.63	0	0	10.87	7.2	17.03	0	6	-1.1836	0.00912207	0.0320085
100359438	Zfp683	mRNA	1	0	1	1	2	1	0	0	-0.0205816	0.98606	1
100359452	LOC100359452	mRNA
100359464	Zfp420	mRNA	196.57	182.31	163.68	150.53	137.21	177.85	159.62	200.24	0.0177446	0.82007	0.908544
100359478	Tstd1	mRNA	35.1	32.87	42	23.91	46.39	46.03	37.24	31.37	-0.286971	0.0883151	0.197478
100359479	LOC100359479	mRNA	0	1	0	3	1	0	4	3	-1.02058	0.234149	0.409393
100359483	Cylc1	mRNA	0	2	0	1	0	0	0	0
100359484	Zfp628	mRNA	293	296	276	237	239	241	298	303	0.00717608	0.907493	0.961499
100359485	Ms4a18	mRNA	1	0	0	0	0	0	0	1	-0.0205816	0.991951	0.999178
100359498	Rpl35a	mRNA	118.86	18.61	235.47	130.4	119.86	13.76	120.82	17.66	0.866815	3e-16	8.21e-15
100359503	LOC100359503	mRNA	0	0	0	0	0	1.23	0	0
100359512	Vti1b	mRNA	746	842	750	764	759	823	764	683	0.0137755	0.708534	0.83357
100359517	LOC100359517	mRNA	0	0	0	1.81	0	0	0	0
100359523	LOC100359523	mRNA	39.75	35.18	25.32	28.22	25.2	31.27	31.69	31.14	0.0862558	0.638071	0.784896
100359528	RGD1565987	mRNA	0	76.78	73.54	46.81	42.91	25.97	47.59	35.49	0.354874	0.0221205	0.0664341
100359529	Immp2l	mRNA	25	23	21	18	18	28	33	17	-0.162601	0.446132	0.630984
100359558	Fam177a1	mRNA	708	640	782	648	624	661	560	622	0.150707	0.000157	0.000939
100359562	Mroh6	mRNA	15	9	11	13	9	13	9	14	0.0725278	0.808513	0.901217
100359574	LOC100359574	mRNA	147.76	202.43	271.58	200.72	146.1	179.03	195.75	154.56	0.263589	0.00042	0.00224025
100359583	LOC100359583	mRNA	435.35	321.11	91.35	174.85	676.87	784.57	487.97	872.02	-1.48468	1.25e-197	1.76e-194
100359586	LOC100359586	mRNA
100359592	Palm3	mRNA	293	423	298	335	366	436	237	364	-0.0772063	0.160441	0.310345
100359595	Tbc1d32	mRNA	102	128	100	59	82	125	83	119	-0.0929123	0.36308	0.551956
100359633	LOC100359633	mRNA
100359642	Chmp4b	mRNA	721.51	879.05	768.99	843.72	951.31	708.16	837.96	754.99	-0.038053	0.288925	0.474675
100359656	LOC100359656	mRNA	8	4	2	0	0	2	12	3	-0.30069	0.562679	0.728295
100359662	Ankdd1b	mRNA	18	17	12	22	17	8	10	15	0.444087	0.0952832	0.209454
100359675	Alpp	mRNA	2.18	4.19	2	3.27	2.12	3.28	2.06	1	0.43978	0.497126	0.675619
100359678	Armcx4	mRNA	813	960	891	747	670	786	743	865	0.134197	0.000184	0.00108125
100359680	Lpcat2	mRNA	160	129	155	188	264	169	193	177	-0.366057	1.68e-06	1.49e-05
100359687	LOC100359687	mRNA	0	51.21	93.05	28.78	123.38	81.56	162	99.91	-1.45244	3.48e-33	3.08e-31
100359692	H2bc9	mRNA	1.23	1.67	0.53	1.28	1.51	1	0	0	0.887458	0.419919	0.606793
100359714	Phf6	mRNA	340.08	340	309	265.55	288	305	324	295	0.0292907	0.614161	0.766498
100359720	Ankrd31	mRNA	0	1	1	0	0	0	0	0
100359731	Tipinl1	mRNA	18.64	20.82	15.1	23.49	40.49	29.53	14.44	26.16	-0.523723	0.013346	0.043951
100359752	LOC100359752	mRNA	7	5	4	5	9	7	1	4	-0.0205816	0.963129	0.995319
100359753	Dnaaf3	mRNA	32	41	44	21	37	36	58	41	-0.338322	0.039566	0.105926
100359775	Bpifa6	mRNA
100359777	LOC100359777	mRNA	0	0	0	0	1	0	0	0
100359816	Setd1b	mRNA	961	1054	1050	676	710	783	794.99	861	0.227953	5.92e-11	1e-09
100359821	Zik1	mRNA	139.41	119.53	159.72	126.63	133.3	118.37	139.07	122.23	0.0675676	0.446289	0.631158
100359823	Tmem167a	mRNA	636	507	556	695	653	592	697	508	-0.0539402	0.193226	0.354841
100359826	Krtap8-1	mRNA	1	0	0	0	0	0	0	0
100359829	Smpd5	mRNA	12	26	22	14	13	19	33	14	-0.114909	0.622383	0.773047
100359832	Fam104b	mRNA	192.82	187.26	208.27	231.21	185.22	181.64	212.28	160.53	0.127386	0.0814751	0.185788
100359836	Kirrel2	mRNA	20	12	8	9	7	18	10	5	0.2722	0.3747	0.563264
100359838	Rfpl4b	mRNA
100359861	Smim15	mRNA	411	316	332	418	429	360	371	297	-0.000913	0.98633	1
100359865	Hrct1	mRNA	19	27	19	43	26	13	39	29	-0.0071611	0.97097	0.999504
100359873	Olfr873	mRNA
100359879	Tmem91	mRNA	444	658	725	452	410	550	674	518	0.0621412	0.15176	0.297671
100359886	Krtap11-1	mRNA	3	1	2	7	0	2	3	3	0.679858	0.287272	0.472596
100359907	LOC100359907	mRNA	1	2	2	1	2	2	0	2	-0.0205816	0.980286	1
100359918	Lnp1	mRNA	1	2	5	2	4	3	8	4	-0.946581	0.0849768	0.191958
100359924	LOC100359924	mRNA	0	0	0	1	0	2	0	0	-1.02058	0.551931	0.721057
100359930	LOC100359930	mRNA	0	0	0	0	0	1	0	0
100359937	LOC100359937	mRNA	2509.13	2655.74	2540.14	2993.36	2834.44	2837.12	2875.9	2436.27	-0.0585587	0.0028031	0.0117998
100359945	Zfp267	mRNA	340.32	321	326	271	287.98	323.68	369.47	277	-0.0203638	0.723306	0.842454
100359951	LOC100359951	mRNA
100359967	Zfp560	mRNA	113	105	124	117	117	111	112	114	-0.00477976	0.960079	0.993709
100359968	LOC100359968	mRNA
100359972	LOC100359972	mRNA
100359977	Cd164l2	mRNA	145	197	117	185	205	173	169	188	-0.211265	0.00660638	0.0243764
100359982	Mpc2	mRNA	1156	1230	1075	1397	1358	1335	1274	1094	-0.0796416	0.00598109	0.0224169
100360011	LOC100360011	mRNA
100360015	Car10	mRNA	702.07	1125.95	1121.75	719.09	671.08	778.92	1021.71	811	0.139863	5.38e-05	0.000357
100360017	Mrps6	mRNA	538	442	402	481	464	447	517	445	-0.0283048	0.548765	0.719846
100360041	Zfp366	mRNA	164	122	153	122	98	108	72	143	0.393599	2.11e-05	0.000152
100360049	LOC100360049	mRNA
100360054	Vstm1	mRNA
100360057	LOC100360057	mRNA	2.07	6.66	6.39	5.59	4.98	2.12	10.24	6.79	-0.241082	0.576378	0.736812
100360061	LOC100360061	mRNA	7.34	6.01	15.88	0	13.97	53.17	17.61	6.91	-1.66942	3.94e-09	5.36e-08
100360066	Evi5	mRNA	1162	1253	1262	1138	1080	1104	1113	1163	0.0899105	0.00269961	0.0114272
100360071	Nps	mRNA	0	0	0	0	1	0	0	0
100360076	LOC100360076	mRNA
100360077	Znhit1	mRNA	807	907	820	829	905	710	871	911	-0.0350941	0.317292	0.502707
100360087	LOC100360087	mRNA	1462.43	1076.49	1142.45	1927.02	2058.24	1528.8	1349.65	919.51	-0.0829598	0.00208161	0.00912978
100360091	Tmem207	mRNA	0	0	0	0	0	1	1	1
100360095	LOC100360095	mRNA
100360100	Taf3	mRNA	415	403	467	351	359	365	401	427	0.0554626	0.277855	0.461287
100360117	LOC100360117	mRNA	16.06	16.06	0	0	0	32.11	32.12	0	-1.02036	0.00075	0.00374012
100360120	Smim10l1	mRNA	170	238	179	205	207	195	225	204	-0.0899297	0.209312	0.376457
100360128	LOC100360128	mRNA
100360143	LOC100360143	mRNA
100360180	Pgd	mRNA	880	786	818	862	868	807	871	892	-0.0597137	0.0882788	0.197444
100360197	Rad51ap2	mRNA	0	1	1	1	0	1	0	0	1.56438	0.312922	0.499257
100360200	LOC100360200	mRNA	5.55	0	0	5.09	0	0	0	0	4.39084	0.00108138	0.00515237
100360205	Palld	mRNA	469	365	377	334	433	394	396	392	-0.0845089	0.0997097	0.216355
100360209	LOC100360209	mRNA
100360218	LOC100360218	mRNA
100360238	LOC100360238	mRNA	0	0	0.95	1.12	0	0	2.21	1.3	-0.782422	0.528945	0.703571
100360244	LOC100360244	mRNA	3	3	4	2	4	5	3	0	-0.0205816	0.972124	0.999905
100360287	Zfp952	mRNA	102	121	138	107	103.02	95.01	114	142	0.0231393	0.807618	0.900795
100360291	Zglp1	mRNA	9	11	4	3	5	1	4	0	1.41238	0.00501404	0.019314
100360296	LOC100360296	mRNA
100360302	Sec16a	mRNA	1891	1836	1963	1364	1544	1543	1383	1725	0.166756	3.02e-11	5.31e-10
100360307	Fam83g	mRNA	1	2	2	3	1	2	2	7	-0.605544	0.352874	0.541337
100360316	LOC100360316	mRNA	0	1.91	3.28	3.56	0	3.37	0	0	1.35595	0.121451	0.251582
100360334	Fhod3	mRNA	1148	1305	1287	1133	1172	1136	955	1193	0.108479	0.000284	0.0015852
100360342	Msh6	mRNA	380	384	428	350	375	397	394	371	-0.015896	0.759831	0.868379
100360358	Tmem251	mRNA	146.86	124.23	144.01	148.79	144.24	132.13	159.59	144.33	-0.0619419	0.467761	0.650428
100360380	LOC100360380	mRNA	331.17	350.44	373.03	341.72	355.05	344.22	335.46	321.67	0.0213066	0.698446	0.826211
100360390	Cldn25	mRNA
100360406	Tsr1	mRNA	393	409	447	393	395	427	423	397	-0.0205816	0.682703	0.815646
100360412	Dnajc1	mRNA	167	129	167	165	183	158	164	136	-0.0501414	0.53589	0.709459
100360417	Rusc1	mRNA	2899	4009	3805	2655	2644	3257	3472	3374	0.0480443	0.00712972	0.02604
100360426	LOC100360426	mRNA
100360427	E2f4	mRNA	462.39	528.42	500	396.76	394	423.34	508.92	454	0.0638606	0.180199	0.337446
100360437	Nsun3	mRNA	12.8	11.16	17.5	13.68	11.78	13	12.46	6.23	0.322498	0.268725	0.450869
100360449	LOC100360449	mRNA	0	0	0.7	0	0	0	0	0
100360457	Fmn2	mRNA	1042	900	986	851	762	735	824	945	0.189898	3.45e-08	4.09e-07
100360464	Arxes2	mRNA	195.79	174.79	193.44	200.29	196.63	157.65	217.44	171.62	0.019554	0.792451	0.890602
100360475	Galnt15	mRNA	40.39	27	37	48.02	30.03	23	25.08	32	0.44843	0.0123626	0.0413139
100360476	Sh2d3a	mRNA	0	0	0	0	0	0	1	0
100360477	LOC100360477	mRNA
100360487	Fam131a	mRNA	54.63	150.81	44.02	30.94	60.85	141.91	7.15	160.17	-0.420932	0.000213	0.0012312
100360496	Fam9b	mRNA
100360501	Rnh1	mRNA	951	975	841	955	1013	931	932	1025	-0.0883476	0.00751595	0.0271797
100360508	LOC100360508	mRNA	1687.19	1692.14	1997.04	2145.4	2020.33	1810.16	1987.46	1493.9	0.0202541	0.392579	0.580801
100360514	LOC100360514	mRNA	13.14	10.37	17.24	10.46	11.45	12.58	10.5	9.36	0.201952	0.495528	0.674297
100360518	Hsh2d	mRNA	29.79	15.02	13	18.18	21	26	19	14	-0.094772	0.681685	0.814909
100360521	LOC100360521	mRNA
100360522	LOC100360522	mRNA	6520.54	5638.56	5911.46	7651.79	7915.27	6462.16	6900.19	6675.22	-0.140554	1.59e-29	1.12e-27
100360533	Tlcd3a	mRNA	474.41	397.3	447	507	556.8	434.01	459	380	-0.0238178	0.617712	0.769201
100360552	Fzd7	mRNA	40	22	19	20	33	29	27	27	-0.220351	0.261167	0.441748
100360557	LOC100360557	mRNA
100360571	Cpxcr1	mRNA
100360573	LOC100360573	mRNA
100360574	LOC100360574	mRNA
100360575	LOC100360575	mRNA	0	1	1	0	0	0	0	0
100360577	LOC100360577	mRNA	134	189	199	134	176	161	202	154	-0.0997412	0.204295	0.370343
100360582	Nt5c	mRNA	55	50	48	43	32	39	42	46	0.281245	0.0670208	0.15981
100360594	Fanci	mRNA	22	29	10	17	20	31	19	21	-0.242974	0.27435	0.456917
100360601	LOC100360601	mRNA	12.1	5.66	10.93	8.37	5.96	10.35	9.18	9.68	0.0549359	0.871474	0.938424
100360606	Zranb1	mRNA	471	521	492	445	467	446	489	466	0.0257771	0.581998	0.741254
100360609	Olfr1055	mRNA
100360619	LOC100360619	mRNA	0	2.71	1.29	2.54	2.95	0	5.18	1.47	-0.574325	0.428136	0.614932
100360621	Il4i1	mRNA	25.5	23.33	18.95	18.58	19.98	19.88	14.41	34.4	-0.0586644	0.787948	0.887283
100360623	Iqgap2	mRNA	113	81	80	108	90	125	66	114	-0.0688616	0.505915	0.683861
100360638	Zfp780b-ps1	mRNA	177.47	176.53	168.84	152.79	127.02	152.92	134.58	137.53	0.270853	0.00103531	0.00495867
100360640	Pxt1	mRNA	2	1	0	1	2	2	1	0	-0.34251	0.722579	0.842437
100360645	LOC100360645	mRNA	15232.2	18405.1	16232.4	14689	14488.3	17136.1	16436.8	15303.9	0.00634009	0.431708	0.618607
100360647	LOC100360647	mRNA
100360664	Rrp36	mRNA	255.07	303.79	345.37	255.03	270.29	311.98	309.32	307.47	-0.0692813	0.243622	0.420418
100360666	Lrtm1	mRNA
100360679	Rps18l1	mRNA	296.71	6.04	0	0.03	0	1343.87	87.66	1.17	-2.26298	3.13e-178	4.1e-175
100360682	Snrpe	mRNA	401	392	393	514	494	444	520	370	-0.125313	0.00991334	0.0342407
100360690	LOC100360690	mRNA
100360692	Pbld2	mRNA	44.63	66.74	44.66	40.1	37.76	53.1	55.85	68.17	-0.152303	0.284813	0.469478
100360722	Sirpd	mRNA
100360750	LOC100360750	mRNA	211.39	202.06	173.06	252.74	236.44	202.09	249.07	207.39	-0.113353	0.101923	0.219933
100360752	Ccdc122	mRNA	48	32	22	38	46	60	41	18	-0.257621	0.119546	0.24828
100360754	Hist1h2ai	mRNA	7.1	6.65	2.56	4.64	4.07	4.07	2.55	6.6	0.256431	0.583475	0.742568
100360757	Ctcfl	mRNA	1	0	0	1	1	0	1	0	-0.0205816	0.988618	1
100360772	Zfp17	mRNA	196	218	218	182	177	172	157	180	0.226239	0.00243541	0.0104734
100360774	LOC100360774	mRNA
100360777	Mroh8	mRNA	33.85	56.02	38.42	32.06	47.98	30.44	52.58	45.37	-0.157962	0.315367	0.500783
100360779	LOC100360779	mRNA	0	1.15	2	0	1	1	0	1	0.0498077	0.965859	0.996651
100360781	LOC100360781	mRNA	0	22.45	44.9	22.45	22.43	0	33.68	22.45	0.172339	0.438849	0.624443
100360790	LOC100360790	mRNA	1	1	1	0	0	2	0	0	0.564381	0.66506	0.803316
100360795	Tmco2	mRNA	1	0	1	0	1	0	2	2	-1.34251	0.241949	0.419071
100360801	Ddx60	mRNA	21.49	19.94	14.08	18.05	12.18	22.93	22.6	11.35	0.0704895	0.770531	0.876125
100360821	LOC100360821	mRNA	0	0	0	1	0.63	0	0	0	0.645995	0.777878	0.880871
100360828	LOC100360828	mRNA	105.06	86.71	108.67	194.16	314.09	201.9	73.61	154.26	-0.60935	1.9e-13	4.09e-12
100360841	LOC100360841	mRNA	0	0	0.8	3.45	7.27	2.12	0.11	8.88	-2.13318	0.00188144	0.00833972
100360846	LOC100360846	mRNA	0	0	0.87	0	0	0	0	0
100360856	LOC100360856	mRNA	498.65	696.04	581.14	780.76	601.62	635.58	591.04	534.65	0.0930867	0.0236989	0.0701849
100360867	Ypel1	mRNA	142	139	144	79	153.14	175	96	129	-0.154803	0.0812531	0.185444
100360868	H3f3c	mRNA	895	664.36	539.58	435.72	247.02	63.54	657.42	636.4	0.639195	5.89e-45	8.12e-43
100360872	Mcpt1l1	mRNA
100360880	Fosb	mRNA	40	41	51	76	21	38	41	32	0.635464	6.09e-05	0.000398
100360914	Fbxw7	mRNA	852.98	911.35	866	790	777.97	873.73	899.84	890.96	-0.0299027	0.39058	0.578918
100360919	Igll1	mRNA	0	0	1	0	0	0	0	1	-0.0205816	0.991951	0.999178
100360933	LOC100360933	mRNA	1	2	2	1	0	2	1	2	0.242453	0.780925	0.882902
100360936	Anapc16	mRNA	226	218	196	262	205	230	202	205	0.0787256	0.254659	0.434066
100360940	LOC100360940	mRNA	0	0	0	0	2.33	5.42	0	0	-3.97478	0.00626918	0.0233059
100360950	LOC100360950	mRNA	6.71	4.34	0	3.29	3.39	2.05	3.17	2.12	0.397813	0.492256	0.671392
100360977	Ppial4d	mRNA	44.57	71.46	51.78	72.45	78.59	38.32	27.82	56.14	0.237753	0.0841326	0.190591
100360982	Relb	mRNA	123	102	127	88	120	120	128	126	-0.187589	0.0471142	0.121209
100361007	Adig	mRNA	0	3	1	0	1	0	3	4	-1.02058	0.234149	0.409393
100361016	LOC100361016	mRNA
100361018	LOC100361018	mRNA	29.33	14.22	20.99	24.86	17.58	22.97	50.43	30.43	-0.462122	0.0207826	0.0630882
100361036	Oxct2a	mRNA	4.18	4.18	4.15	0	0	0	11	4.18	-0.299672	0.585583	0.74432
100361043	Dytn	mRNA
100361053	Hbq1b	mRNA	17.4	11.95	16.26	13.18	11.82	21.13	10.93	13.5	0.0144412	0.956981	0.992184
100361056	LOC100361056	mRNA	2.28	1.15	0	3.39	1.22	1.17	1.1	2.28	0.220619	0.786521	0.886548
100361079	LOC100361079	mRNA	2.87	0.71	0	0	6.88	4.44	0.35	3.97	-2.14779	0.00398132	0.0158837
100361083	LOC100361083	mRNA	109	68	63	93	69	66	27	79	0.445907	0.000235	0.00133328
100361087	LOC100361087	mRNA	22	13	14	17	23	16	16	20	-0.205006	0.399329	0.586901
100361090	LOC100361090	mRNA	0	0	3.6	1.28	3.51	0	0	2.49	-0.318663	0.716365	0.839655
100361092	Malrd1	mRNA	2	1	1	1	2	1	0	5	-0.698654	0.38914	0.577625
100361098	LOC100361098	mRNA	1.18	0	0	0	0	0	0	0
100361104	LOC100361104	mRNA	0	1	0	1	0	0	0	0
100361114	Zfp869	mRNA	278.3	317.71	284.09	313.25	288.54	279	320.01	325.97	-0.0447623	0.446604	0.631456
100361125	Pom121l12	mRNA
100361126	RGD2320734	mRNA	157.08	152.85	112.35	211.81	227.48	173.99	177.66	141.26	-0.204672	0.00910745	0.0319695
100361133	Mycbp	mRNA	220.97	217	174.87	246.25	224.14	253.01	222.27	211.91	-0.105746	0.123137	0.25424
100361134	Shisa9	mRNA	1280	1499	1708	1204	1148	1099	1433	1582	0.0924893	0.000798	0.00394009
100361138	Dgkq	mRNA	720	828	883	575	603	738	809	811	0.0011789	0.974822	1
100361139	LOC100361139	mRNA
100361143	LOC100361143	mRNA	1.01	1	0.95	2.27	0	0	1	1.55	1.01573	0.34141	0.529335
100361147	Mkrn2os	mRNA
100361166	Rgs21	mRNA
100361180	LOC100361180	mRNA	10.73	12.08	10.94	20.64	10.42	28.92	12.82	8.05	-0.167243	0.535192	0.708843
100361188	Etfrf1	mRNA	148.81	117.12	100.16	141	147.43	145.09	128	98.56	-0.0542967	0.546644	0.717938
100361194	LOC100361194	mRNA
100361204	LOC100361204	mRNA
100361234	Btbd19	mRNA	132	123	128	101	127	117	151	87	-0.0146077	0.874967	0.9413
100361238	Rasgef1b	mRNA	322	340	327	338	292	318	298	345	0.0622003	0.273622	0.456037
100361261	Gzmbl3	mRNA	1	0	0	1	0	0	0	0
100361265	LOC100361265	mRNA	6.58	0	14.79	0	2	2.98	3	4.14	0.797616	0.116805	0.243971
100361269	Snrpa1	mRNA	187	215	191	206	199	204	208	207	-0.054487	0.447649	0.632349
100361272	Ankub1	mRNA	50	13	37	29	29	25	25	19	0.375936	0.0507228	0.127924
100361292	Fam205a	mRNA	45.92	11.78	13.15	9.08	6	11	16.99	6	0.978516	0.000311	0.00171456
100361294	Tyk2	mRNA	415	487	467	345	457	374	417	435	0.00575032	0.90753	0.961426
100361300	Spink10	mRNA
100361314	Prr9	mRNA
100361323	Astn2	mRNA	335	397	440	317	283	320	337	388	0.144507	0.0079067	0.0283632
100361371	Smco2	mRNA	0	0	1	0	0	1	2	0	-1.60554	0.300359	0.487321
100361376	Kank2	mRNA	419.13	320.05	337	270.86	354.24	368.18	430.55	395.02	-0.221185	3.79e-05	0.000258
100361383	Ecm2	mRNA	2.39	0	20.52	20.99	7.18	0	0	2.34	2.18461	1.29e-06	1.17e-05
100361389	Fam171a2	mRNA	972.31	1442.52	1390	966.41	960.7	1054.7	1228.98	1148.96	0.0984645	0.0010922	0.00519449
100361414	Pate3	mRNA
100361417	Tbcd	mRNA	762	780	809	826	802	858	761	717	-0.00276188	0.939366	0.981587
100361422	Cldn34c4	mRNA
100361431	Syce1l	mRNA	4.89	2.26	6.85	3.61	3.39	5.62	1.1	8.01	-0.0617697	0.898181	0.956056
100361434	LOC100361434	mRNA
100361444	Angptl8	mRNA	1	1	2	2	1	3	11	8	-1.95918	0.000997	0.00480242
100361457	LOC100361457	mRNA	175.23	151.65	179.6	177.03	198.87	172.55	188.26	281.8	-0.320548	1.51e-05	0.000113
100361460	Insyn2b	mRNA	272.73	318.6	314.28	210.41	177.19	256.74	188.21	269.51	0.303232	2.68e-06	2.29e-05
100361465	Pate2	mRNA	5	3	3	1	7	8	5	6	-1.13606	0.0192727	0.0593455
100361468	Gzmbl2	mRNA	0	1	4	0	0	0	0	0	3.30135	0.041885	0.110575
100361492	LOC100361492	mRNA
100361503	Zfp717	mRNA	1191.24	1277.98	1233.65	1202.48	1049.24	1237.19	1209.87	1243.21	0.0290366	0.323018	0.508174
100361506	Armc3	mRNA	37	21	22	33	33	27	42	27	-0.21163	0.25439	0.433769
100361513	Gcc1	mRNA	282.83	262.01	287.87	250.2	261.14	271.95	244.99	268.03	0.0292972	0.639444	0.785794
100361517	Psmg3	mRNA	201	291	221	276	260	296	253	265	-0.139533	0.0281228	0.0805268
100361520	Rpl37a	mRNA	2094.77	1941.41	1945.63	2952.06	2550.4	2253.81	2228.49	2089.87	-0.0507367	0.0181295	0.0564563
100361529	Rad9a	mRNA	291	262	280	243	246	269	293	243	0.0133338	0.831232	0.915155
100361543	LOC100361543	mRNA	0	0	0	0	0	0	44.84	31.25	-7.27022	8.76e-19	3.05e-17
100361547	LOC100361547	mRNA
100361556	LOC100361556	mRNA	0	0	0	0	0	1	0	0
100361558	H3f3a	mRNA	3611.51	2939.53	3100.39	3785.4	3958.49	3616.5	3484.57	3365.37	-0.122953	1.15e-12	2.32e-11
100361568	Hilpda	mRNA	59	57	70	63	68	75	74	57	-0.158612	0.208959	0.37608
100361571	Krtap1-1	mRNA
100361574	Polr2k	mRNA	314	295	283	405	370	315	335	319	-0.0665591	0.236298	0.412167
100361579	LOC100361579	mRNA	1	0	2	1	1	1	1	0	0.394456	0.718967	0.841036
100361582	Ttc24	mRNA	1	4	0	0	0	3	2	1	-0.283616	0.74493	0.858336
100361584	Ano2	mRNA	8	2	4	6	5	3	6	7	-0.0909709	0.840033	0.921053
100361585	RGD1310951	mRNA	640.77	502.41	565.65	535.69	579.24	471.2	415.18	514.24	0.160427	0.000306	0.00169092
100361588	Wdr95	mRNA	0	0	1	0	0	5	0	0	-2.34251	0.0860011	0.193651
100361623	RGD1561318	mRNA
100361626	Krtap12-2	mRNA
100361631	Tmem35b	mRNA	7	7	8	11	9	10	8	3	0.116922	0.747865	0.859934
100361633	Cd300ld	mRNA	6.12	6.37	7.99	4.1	4.14	5	7.51	4	0.230762	0.59137	0.748507
100361639	RGD1562521	mRNA
100361642	LOC100361642	mRNA
100361645	LOC100361645	mRNA	165.66	154.15	143.39	118.56	117.86	141.33	148.28	161.07	0.0125806	0.882441	0.945786
100361647	Galnt6	mRNA	947	729	747	879	696	759	573	797	0.204508	3.03e-08	3.6e-07
100361652	Lce6a	mRNA
100361655	LOC100361655	mRNA	111	187	203	127	116	149	201	114	0.09413	0.257035	0.436412
100361657	Pate1	mRNA
100361658	Usp37	mRNA	469	396	520	419	387	383	375	432	0.173435	0.000481	0.00253062
100361660	Zfp617	mRNA	109.14	81	77.35	114	74	91	96.94	112	0.00825682	0.937311	0.980334
100361664	LOC100361664	mRNA
100361672	Zc2hc1b	mRNA	1	1	3	1	0	0	1	3	0.564381	0.540361	0.713137
100361684	Simc1	mRNA	236	267	306	197	218	249	236	229	0.0896468	0.171537	0.324578
100361693	LOC100361693	mRNA
100361702	LOC100361702	mRNA
100361706	LOC100361706	mRNA
100361710	Setdb2	mRNA	179.41	188.18	200.08	163.21	189.94	181.13	171.15	184.09	-0.0115325	0.878733	0.943247
100361733	Ociad2	mRNA	234	306	268	261	181	270	248	210	0.213328	0.00102759	0.00492427
100361739	LOC100361739	mRNA
100361756	LOC100361756	mRNA
100361765	Hoxb2	mRNA	427	532	483	327	388	388	623	444	-0.0797036	0.0969104	0.211937
100361774	Ralgps1	mRNA	741.4	737.52	752.9	591.73	601.97	596.33	512.48	622.16	0.254779	2.51e-10	3.97e-09
100361793	LOC100361793	mRNA
100361814	LOC100361814	mRNA	1	0	0	0	1	0	0	1	-1.02058	0.551931	0.721057
100361818	Nfatc1	mRNA	168	141	159	142	154	143	120	166	0.0447317	0.592369	0.749099
100361828	LOC100361828	mRNA
100361830	Tram2	mRNA	22	5	14	10	11	12	12	13	0.0668812	0.81764	0.906839
100361850	LOC100361850	mRNA
100361854	LOC100361854	mRNA	0	19.05	8.52	0	34.1	0	0	0	-0.327254	0.374446	0.563114
100361859	Lce3d	mRNA
100361866	LOC100361866	mRNA
100361884	Prl8a3	mRNA
100361891	Rab5al1	mRNA	1749.75	1550.53	1668.59	1725.51	1812.99	1638.01	1621.15	1478.86	0.0106515	0.670934	0.806636
100361898	LOC100361898	mRNA	79.31	81.08	74.07	58.83	52.48	53.77	85.73	96.52	0.00317495	0.978826	1
100361902	Zfp42l	mRNA	6	0	0	2	1.51	2	0	1.51	0.651731	0.421315	0.607899
100361907	LOC100361907	mRNA
100361909	Ear1	mRNA	0	0	0	0	0	0	1.24	0
100361913	LOC100361913	mRNA
100361920	LOC100361920	mRNA	0	1.05	0	0	0	1.05	0	0	-0.0205816	0.991752	1
100361923	Ikzf4	mRNA	41.61	52	60.16	26.43	41.74	35.87	55	46	-0.00779546	0.959185	0.993401
100361928	Tmem198	mRNA	340	464	419	326	274	363	441	360	0.0866919	0.100685	0.217929
100361931	Tmem221	mRNA	11	15	31	8	7	15	29	27	-0.283616	0.240795	0.41802
100361939	Rnaseh2c	mRNA	111	184	153	159	177	186	165	181	-0.244671	0.00212944	0.0093217
100361944	LOC100361944	mRNA
100361946	Lrrc74b	mRNA	27	25	19	15	28	34	45	38	-0.774226	6.07e-05	0.000398
100361947	Zfp42	mRNA	0	0	0	0	0.49	0	0	0.49
100361951	Lce3e	mRNA
100361960	Cox7b2	mRNA	0	0	1	0	1	0	0	0	-0.0205816	0.991951	0.999178
100361968	LOC100361968	mRNA	0	0	0.94	0	0	0	0	0
100361969	LOC100361969	mRNA
100361997	Ect2l2	mRNA	6.6	10.91	6.17	6.61	8.61	4.17	8.77	7.28	0.0506891	0.892567	0.952182
100362005	Grcc10	mRNA	1319	1330	1390	1573	1583	1453	1611	1318	-0.108589	5.15e-05	0.000343
100362022	Zfp27	mRNA	101.16	83.14	54.54	56.62	96.81	139	44.12	45.42	-0.159611	0.168356	0.320579
100362023	LOC100362023	mRNA	30.78	0	37.64	13.39	42.96	40.16	0	5.07	-0.128919	0.560324	0.726376
100362027	LOC100362027	mRNA	377.4	614.98	1190.56	1091.4	1867.89	450.75	495.98	1276.38	-0.341831	3.81e-24	2.01e-22
100362031	LOC100362031	mRNA
100362040	LOC100362040	mRNA
100362054	LOC100362054	mRNA	5	5	5	5	3	5	5	6	0.053419	0.90797	0.961725
100362059	Ttc16	mRNA	61	43	49	35	71	47	53	61	-0.323974	0.0217467	0.0655262
100362067	LOC100362067	mRNA
100362068	Vom1r-ps112	mRNA	0	0	1	0	0	0	1	0	-0.0205816	0.991951	0.999178
100362078	LOC100362078	mRNA
100362083	Zfp866	mRNA	64.73	62.9	68.68	72.71	67.05	65.28	74.49	61.43	-0.0164464	0.89489	0.953439
100362089	Zfp663	mRNA	4	3	2	3	1	3	5	7	-0.435619	0.42674	0.61348
100362102	Lsm14b	mRNA	973.58	1205.99	1111.13	962.99	1001.92	974.99	1081.99	1061.61	0.0253104	0.422144	0.608807
100362109	LOC100362109	mRNA	2	6	5	5	4	3	2	5	0.341988	0.504231	0.682188
100362110	LOC100362110	mRNA	2693.45	2461.99	2231.76	1903.86	2270.03	2506.38	2864.11	2404.78	-0.133187	1.39e-10	2.25e-09
100362113	LOC100362113	mRNA	171.57	142.97	139.32	136.28	162.42	127	185.55	142.28	-0.0853793	0.303915	0.490116
100362120	Catsperz	mRNA	53	68	58	36	53	60	66	73	-0.249669	0.0619038	0.149911
100362121	Ddb2	mRNA	62	47	55	46	38	54	64	36	0.108701	0.450265	0.634234
100362122	LOC100362122	mRNA
100362123	Rex2	mRNA	95.4	69.61	69.45	65.5	91.7	78.47	85.27	74.25	-0.156922	0.17259	0.326064
100362124	Ift140	mRNA	878	684	1069	750	806	1161	621	694	0.0222932	0.528264	0.70297
100362149	LOC100362149	mRNA
100362155	Cyhr1	mRNA	261	250	242	249	261	251	255	254	-0.047682	0.457318	0.641457
100362169	Fam170b	mRNA	1	0	1	0	1	0	1	2	-1.02058	0.400196	0.587302
100362170	Zfp964	mRNA	67	47	65	52.76	64	71.73	73.76	93.82	-0.408743	0.00110586	0.00524991
100362172	LOC100362172	mRNA	15.48	13.21	11.39	9.77	29.49	12.58	18.49	22.7	-0.760612	0.00276888	0.0116665
100362173	LOC100362173	mRNA
100362176	LOC100362176	mRNA	95	128	104	90	87	94	82	67	0.317	0.00276675	0.0116629
100362197	LOC100362197	mRNA	223.96	240.14	186.27	247.35	266.63	232.28	277	222.55	-0.174021	0.00867896	0.0306533
100362202	Znf408	mRNA	189	190	235	226	208.85	209	183.65	229	-0.00417246	0.952869	0.990556
100362205	Fndc9	mRNA	2	13	5	9	7	3	8	7	0.193543	0.622548	0.773174
100362207	Krtap16-1	mRNA
100362216	LOC100362216	mRNA	61.58	79.14	87.44	39.24	70	77.08	94.05	79.01	-0.280285	0.0187804	0.0581275
100362241	Plekhg6	mRNA	15	15	21	21	12	23	15	16	0.104949	0.669317	0.805273
100362255	Adgrv1	mRNA	492	320	441	447	364	360	448	377	0.113616	0.024878	0.0728873
100362279	Trappc3l	mRNA	18	28	20	29	17	14	18	19	0.461811	0.0424313	0.111671
100362283	Tmem52	mRNA	96	33	74	179	86	41	31	74	0.698866	3.42e-09	4.69e-08
100362311	Arhgap33	mRNA	651	887.49	945	362	525.38	553.55	750	591	0.21313	8.73e-08	9.77e-07
100362315	LOC100362315	mRNA	163	183	180	160	163	176	194	144	-0.00152887	0.984393	1
100362319	LOC100362319	mRNA
100362321	Smim19	mRNA	800	779	672	973	893	883	842	801	-0.105304	0.00293909	0.012268
100362324	Dhx29	mRNA	419	473	510	378	352	431	452	443	0.0645529	0.188393	0.348482
100362331	Ndufa4l2	mRNA	82	94	77	73	89	94	127	78	-0.271766	0.0120038	0.0402766
100362333	LOC100362333	mRNA	518.1	516.95	437.21	413.63	605.63	511.87	414.85	482.48	-0.115994	0.0120684	0.040486
100362342	LOC100362342	mRNA	29	35	45	44	36	54	51	45	-0.302353	0.0542568	0.134979
100362346	Mta3	mRNA	1471.09	1894	1914.98	1504.08	1457	1617	1694.84	1654.05	0.0583639	0.0201106	0.061394
100362347	Fnip1	mRNA	801	666	814	677	870	646	631	668	0.0509055	0.18014	0.337372
100362350	LOC100362350	mRNA
100362365	Tmem210	mRNA	2	2	2	9	4	10	5	5	-0.698654	0.135803	0.274241
100362422	Efcab13	mRNA	0	1	2	0	1	0	0	1	0.564381	0.66506	0.803316
100362431	Ttc30a	mRNA	49.82	33.39	55.78	44.57	48.14	45.51	44.85	46.36	-0.030763	0.83785	0.919677
100362432	LOC100362432	mRNA	0	2.95	0	0	0	0	0	0
100362441	Gpr82	mRNA	0	1.3	1.71	0	0.55	0	0	1.41	0.598328	0.647637	0.790506
100362450	Anos1	mRNA
100362458	Gigyf2	mRNA	1144.34	1260.09	1153.06	967.71	936.11	1155.36	1015.51	1124.15	0.0763569	0.0132966	0.0438276
100362470	Mrtfb	mRNA	52	52	62	41	20	33	26	42	0.754042	3.33e-06	2.81e-05
100362471	Tmem240	mRNA	486	658	551	530	501	554	634	581	-0.0494686	0.250369	0.428909
100362477	Fam90a1	mRNA
100362495	Haus5	mRNA	258	175	191	156	179	204	208	197	-0.0353031	0.628037	0.77746
100362538	Tex55	mRNA	0	0	1	0	0	0	0	0
100362547	Ap1g2	mRNA	257	242	249	162	244	230	239	239	-0.0856766	0.20014	0.364614
100362548	Elp3	mRNA	1225	1477	1402	1333	1219	1356	1374	1381	0.00809368	0.770996	0.876273
100362554	Otulin	mRNA	570	518	532	606	556	556	551	580	-0.0315576	0.464677	0.648156
100362555	Sptssb	mRNA	290	349	365	297	285	313	348	321	0.0176228	0.756942	0.866157
100362565	Pkd1l3	mRNA	8	11	13	3	7	10	19	11	-0.445887	0.163977	0.314726
100362567	Siglecl1	mRNA
100362572	Mpv17l	mRNA	486.11	409.5	439.29	399.03	362.07	408.99	452.95	354.3	0.115083	0.0217763	0.0655723
100362580	Spag11bl	mRNA	0	1	0	1	1	1	1	3	-1.60554	0.143017	0.285053
100362588	Izumo3	mRNA	1	0	0	1	0	0	0	0
100362606	Akain1	mRNA	152	160	154	155	121	187	155	157	-0.0182566	0.823614	0.910708
100362623	Mt1m	mRNA	21.5	13.27	18.89	11.72	11.39	25.07	11.25	10.74	0.141065	0.586706	0.744972
100362634	Kmt2d	mRNA	3901.25	3778.45	3867.24	2160.7	2664.53	2688.96	2497.9	3059.26	0.308662	7.69e-63	1.85e-60
100362640	Rps4x	mRNA	2893	2621	2872	3453	3398	3122	3445	2834	-0.133065	4.6e-13	9.52e-12
100362641	Zfp945	mRNA	117.01	104	113.37	105.2	109.61	96	84	91.04	0.187079	0.0636636	0.153201
100362644	Slc2a7	mRNA	1	4	0	0	4	3	0	1	-0.698654	0.38914	0.577625
100362676	Klhl33	mRNA	37	43	36	52	36	49	37	50	-0.0545289	0.727495	0.845452
100362678	Epc1	mRNA	493	527	579	465	452	453	471	522	0.100381	0.0286037	0.081623
100362684	LOC100362684	mRNA	0	31.27	0	0	31.27	62.53	0	31.27	-2.02047	4.83e-15	1.2e-13
100362690	LOC100362690	mRNA
100362694	Trim60	mRNA
100362696	Fam47a	mRNA
100362710	Tiam2	mRNA	72	61	72	68	41	72	57	67	0.183432	0.151599	0.297451
100362724	LOC100362724	mRNA
100362725	Cdkl5	mRNA	197	159	188	168	167	146	95	170	0.280226	0.000504	0.00263112
100362733	Irgm2	mRNA	280.92	200.65	189.3	215.78	293.82	255.93	352.64	219.62	-0.360231	2.46e-08	2.98e-07
100362748	Cfap74	mRNA	46	55	44	18	46	50	73	44	-0.406563	0.00652604	0.0241091
100362764	Ddx55	mRNA	217	174	189	177	183	211	199	165	-0.0224862	0.761633	0.86957
100362783	LOC100362783	mRNA	19.05	27.05	27.24	14.24	29.43	24.24	28.66	25	-0.313962	0.129718	0.264813
100362785	Ankdd1a	mRNA	62	72	100	33	55	55	88	61	0.023306	0.85304	0.928837
100362805	Txndc5	mRNA	1047	992	977	885	950	1007	912	965	0.00441205	0.893019	0.952553
100362810	LOC100362810	mRNA	0	0	0	0.64	0	0.77	0	0	-0.287368	0.906059	0.960757
100362814	LOC100362814	mRNA	1052.05	1363.27	1378.61	937.7	788.96	1088.4	982.07	1143.33	0.220761	9.45e-13	1.92e-11
100362817	Cdrt4	mRNA
100362819	Auts2	mRNA	712	839	844	521	635	617	676	710	0.123965	0.00137469	0.00635167
100362820	LOC100362820	mRNA	17	20	36	21	14	13	11	15	0.806087	0.000902	0.00438967
100362830	LOC100362830	mRNA	9.07	29.36	10.28	23.83	11.64	0	6.86	21.31	0.845064	0.00239481	0.010323
100362836	Poc1b	mRNA	132.51	170.78	146.33	127.96	151.71	135.23	152.61	201.7	-0.171448	0.0381677	0.102995
100362856	LOC100362856	mRNA
100362891	Tex13a	mRNA
100362904	Bsph2	mRNA	0	0	1	0	0	0	0	0
100362908	Cfap92	mRNA	19	18	11	10	26	22	23	18	-0.638334	0.00800235	0.0286502
100362909	Tex52	mRNA	84	62	69	76.66	85.76	91.81	49	72.18	-0.0552328	0.641849	0.787587
100362912	Tmprss12	mRNA	3	1	4	4	4	2	4	6	-0.435619	0.42674	0.61348
100362915	Zfp648	mRNA	15	16	19	17	11	20	15	13	0.162865	0.526762	0.701404
100362940	Snx21	mRNA	715	869	778	787	751	813	838	821	-0.054092	0.134531	0.272212
100362949	LOC100362949	mRNA	0	0	2	0	1	2	0	0	-0.605544	0.642279	0.787139
100362965	LOC100362965	mRNA	137.11	200.04	240.3	182.29	144.69	233.54	116.39	145.91	0.225658	0.00348619	0.014199
100362967	LOC100362967	mRNA	0	0	0	0	2.97	4.42	9.12	0	-5.06585	2.57e-05	0.000182
100362978	LOC100362978	mRNA
100362980	LOC100362980	mRNA	508.87	435.7	416.98	465.56	417.96	437.63	497.57	439	0.00728243	0.879314	0.943649
100362981	LOC100362981	mRNA	5.47	0	3.47	0	0	2.12	3.16	5.35	-0.270376	0.679047	0.812444
100362987	LOC100362987	mRNA	0	0	5.65	8.73	21.44	0	21.38	60.15	-2.86067	3.39e-18	1.11e-16
100362996	LOC100362996	mRNA
100363016	LOC100363016	mRNA
100363043	LOC100363043	mRNA
100363053	Tas2r145	mRNA
100363064	LOC100363064	mRNA	0	0	0	0	0	0	0	4
100363065	Zfp11	mRNA	107.43	125.37	140	133	88	110	129	134	0.113219	0.222682	0.394387
100363074	Acot11	mRNA	425	300	342	410	374	344	246	460	0.0321391	0.548575	0.7197
100363095	Henmt1	mRNA	17	5	13	6	8	14	4	8	0.249508	0.454913	0.638719
100363110	LOC100363110	mRNA
100363111	C2cd4d	mRNA	23	31	19	26	34	31	31	25	-0.310088	0.111827	0.235967
100363112	LOC100363112	mRNA	22.92	9.52	21.11	10.41	17.02	16.19	24.47	14.84	-0.201791	0.414373	0.601768
100363116	LOC100363116	mRNA	36.49	53.47	52.64	76.36	61.72	53.95	82.85	104.4	-0.488851	0.00012	0.000735
100363125	LOC100363125	mRNA
100363129	LOC100363129	mRNA	6.24	4.22	4.38	4.28	1.11	4.97	3.01	3.01	0.639494	0.221549	0.392987
100363136	LOC100363136	mRNA
100363141	LOC100363141	mRNA
100363145	Stab1	mRNA	158	108	144	107	119	115	151	113	0.0334369	0.712003	0.836147
100363146	Fam228b	mRNA	31	24	28	21	22	23	26	20	0.172063	0.405517	0.592713
100363171	LOC100363171	mRNA	10	7	11	14	9	10	13	13	-0.120117	0.69788	0.825835
100363178	Tmigd3	mRNA	12	12	14	21	18	9	18	14	-0.0205816	0.938237	0.980855
100363184	Krtap13-1	mRNA
100363193	LOC100363193	mRNA	10	25	10	5	5	5	9	13	0.623275	0.0533494	0.133137
100363196	Zfp791	mRNA	14	34	36	20	32	27	28	28	-0.165632	0.395897	0.584152
100363219	Olr1872	mRNA
100363225	LOC100363225	mRNA	71.61	85.8	34.68	84.23	68.18	86.6	89.94	51.95	-0.123101	0.307284	0.493855
100363228	LOC100363228	mRNA	20.5	14.05	25.56	21.43	21.75	18.47	35.41	26.25	-0.341873	0.109659	0.232411
100363236	LOC100363236	mRNA
100363238	Lrcol1	mRNA	0	0	0	1	0	0	0	0
100363253	Nt5c2	mRNA	986.67	962.94	1018	957.47	848.38	906.82	995.62	899	0.0843151	0.0110057	0.0375116
100363266	Igip	mRNA	2690.9	2581.49	2714.05	2550.84	2255.72	2283.18	2640.46	2296.37	0.132612	8.15e-11	1.35e-09
100363268	LOC100363268	mRNA
100363270	Btbd18	mRNA
100363275	Adgra2	mRNA	822	741	670	586	723	691	746	845	-0.112763	0.00286565	0.0120162
100363276	Arhgap6	mRNA	237	298	292	178	208	192	262	259	0.105341	0.10927	0.231773
100363280	Tmem74bos	mRNA	6	8	13	6	2	4	7	6	0.775885	0.0570454	0.14041
100363287	LOC100363287	mRNA
100363289	LOC100363289	mRNA	4	1	4	1	5	2	3	2	-0.283616	0.645452	0.788707
100363294	LOC100363294	mRNA	1	1	0	0	0	0	0	0
100363310	Cystm1	mRNA	871	931	890	1029	1000	997	953	931	-0.0813197	0.0140059	0.0457051
100363314	LOC100363314	mRNA	13	22	18	22	7	16.55	11	14	0.606838	0.0208618	0.0633183
100363321	LOC100363321	mRNA
100363332	Card11	mRNA	216	144	139	115	228	156	218	175	-0.360258	3.47e-06	2.92e-05
100363333	LOC100363333	mRNA
100363341	Lrriq4	mRNA	0	1	1	1	0	0	1	2	-0.0205816	0.98606	1
100363344	LOC100363344	mRNA
100363350	Nxpe2	mRNA	34.73	20.52	26.22	31	27.18	27	31.2	19.14	0.0851796	0.663765	0.803341
100363361	Zfp687	mRNA	597	658	757	494	573	548	631	680	0.0226616	0.581026	0.740428
100363367	Dthd1	mRNA	4	1	4	1.31	0	1.33	1	0	2.12506	0.0211161	0.0639309
100363368	Poteh	mRNA	8	10	10	8	13	8	4	9	0.0618805	0.857626	0.931892
100363372	LOC100363372	mRNA	79.02	61.98	78.36	66.57	51.03	53.06	63.83	69.02	0.250559	0.0475574	0.122161
100363376	Cmc2	mRNA	213	198	121	247	223	203	169	198	-0.0462792	0.524825	0.699715
100363433	Srrm5	mRNA
100363436	Mdfic2	mRNA	1	0	0	0	1	0	0	1	-1.02058	0.551931	0.721057
100363439	Rps10l1	mRNA	1231.37	1194.3	1467.35	1439.26	1495.15	1221.24	1260.61	1275.36	0.00120512	0.965724	0.99668
100363449	LOC100363449	mRNA
100363454	LOC100363454	mRNA	2.75	0	0	2.64	0	0	0	0	3.4097	0.0322519	0.0900282
100363455	Zfp69	mRNA	74.28	48.69	46.89	26.7	65.12	67.83	53.07	55.03	-0.314944	0.0227587	0.0679718
100363472	LOC100363472	mRNA	0	0	0	4.26	0	0	6.67	0	-0.667415	0.450094	0.634188
100363484	Ddit4l	mRNA	59	49	46	30	82	76	85	75	-0.809903	6.66e-10	9.95e-09
100363492	Ly6k	mRNA
100363494	LOC100363494	mRNA	58.56	67.47	42.67	45.99	51.99	35.87	41.68	93.11	-0.0731042	0.596246	0.751977
100363500	LOC100363500	mRNA
100363502	LOC100363502	mRNA	0	1424.05	0	0	25.08	735.35	751.2	1316.75	-1.01056	4.33e-109	2.73e-106
100363510	LOC100363510	mRNA
100363520	LOC100363520	mRNA	20.62	18.43	19.38	16.63	20.7	19	17.06	11.58	0.114732	0.63414	0.781898
100363531	LOC100363531	mRNA	0	2	1	1	0	0	0	0
100363535	LOC100363535	mRNA	14	9.89	17	13	17.83	12	16	16.88	-0.23926	0.371257	0.559788
100363539	Mrpl33	mRNA	274.4	297	301.14	408.52	349.05	376.49	333.97	290.67	-0.0963953	0.0866333	0.194548
100363712	LOC100363712	mRNA
100363867	LOC100363867	mRNA
100363883	LOC100363883	mRNA
100363914	LOC100363914	mRNA
100363993	LOC100363993	mRNA	0	0	1	0	0	0	0	0
100364002	LOC100364002	mRNA
100364016	LOC100364016	mRNA	23	21	15.9	9	10.18	0	14	0	1.49011	3.07e-06	2.61e-05
100364027	Hkdc1	mRNA	39	40	37	55	41	31	54	50	-0.0621607	0.688206	0.820108
100364062	LOC100364062	mRNA	0	3.98	0	0.52	5.1	11.63	0	6.04	-2.35972	0.000233	0.00132902
100364132	Zfp300	mRNA	38	47	46	36	53	41	38	42	-0.0798208	0.609493	0.762959
100364155	LOC100364155	mRNA
100364162	Rnf11l1	mRNA	1525.64	1628.44	1598.89	1541.2	1434.65	1420.28	1306.91	1591.83	0.108952	3.43e-05	0.000236
100364165	Nktr	mRNA	1892	2001	2086	1368	1620	1768	1800	1954	0.0202455	0.398334	0.586237
100364194	LOC100364194	mRNA	1	1	0	1	1	0	2	0	-0.0205816	0.98606	1
100364240	Btbd8	mRNA	937.53	1133.27	1170.83	993.98	1105.74	1119.64	972.58	1051.5	-0.0252914	0.419408	0.607012
100364265	LOC100364265	mRNA	1924.31	1839.14	1749.27	1232.59	1420.64	1752.15	1463.31	1646.68	0.0819001	0.00119952	0.00565207
100364335	LOC100364335	mRNA	1368.22	1132.89	1223.4	1167.15	766.43	1094.14	937.08	1014.33	0.339202	8.71e-28	5.56e-26
100364350	Nwd1	mRNA	1326.81	1046.96	1081.08	1559.93	1050.96	1194.2	742.07	1233.87	0.227986	3.46e-14	7.97e-13
100364435	LOC100364435	mRNA	0	0	1.48	0	0	2.92	2.74	6.97	-3.11377	0.00150689	0.00688607
100364457	LOC100364457	mRNA	0	0	41.71	0	0	0	0	0	6.36174	2.68e-11	4.73e-10
100364500	LOC100364500	mRNA	208.5	222.55	235.62	67.08	86.49	176.64	182.47	217.72	0.125002	0.105603	0.225957
100364523	LOC100364523	mRNA
100364550	Krtap24-1	mRNA
100364561	LOC100364561	mRNA
100364568	Rprd2	mRNA	790	799	868	644	601	643	614	690	0.262787	8.55e-12	1.58e-10
100364613	Krtap27-1	mRNA
100364673	LOC100364673	mRNA	3	3	5	3	4	5	3	1	0.0863336	0.876488	0.942079
100364769	LOC100364769	mRNA	0	0	0	0	0	1	1	1
100364835	LOC100364835	mRNA
100364862	LOC100364862	mRNA
100364877	LOC100364877	mRNA	0	2.92	0	0	0	0	2.21	1.95	-0.531197	0.626924	0.776765
100364958	LOC100364958	mRNA	12.82	11.8	11.71	8.57	7.15	15.34	4.69	16.41	0.0221366	0.942469	0.983484
100364984	Rab37	mRNA	788	609	558	883	973	731	658	735	-0.146578	9.16e-05	0.000575
100364990	Pdss1	mRNA	84	85	93	93	92	87	100	92	-0.0841818	0.431853	0.618743
100365008	LOC100365008	mRNA	0	0	3	2	3	3	1	1	-0.698654	0.38914	0.577625
100365043	LOC100365043	mRNA	4.63	1.94	0	4.57	0.03	0	1.71	1.55	1.73901	0.0359767	0.0982548
100365184	Prdm14	mRNA
100365199	Wfdc13	mRNA
100365259	Spty2d1	mRNA	191	225	191	155	208	169	142	207	0.0492398	0.51041	0.687602
100365363	LOC100365363	mRNA	95	126	124.39	124	122.75	102	69	118	0.168437	0.0834523	0.189354
100365370	Ctdsp2	mRNA	1532	1293	1407	1170	1310	1320	1445	1365	-0.0306946	0.267978	0.449987
100365450	LOC100365450	mRNA	0	2	2	2	0	1	2	2	0.242453	0.780925	0.882902
100365504	Sf3b6	mRNA	350	415	366	486	461	370	488	347	-0.0636503	0.20626	0.372835
100365542	LOC100365542	mRNA	0	0	0	0	0	1	0	0
100365588	LOC100365588	mRNA
100365646	LOC100365646	mRNA
100365679	Dennd5b	mRNA	357	447	427	305	281	303	227	349	0.384472	5.78e-12	1.09e-10
100365683	Nr2e3	mRNA	0	1	0	0	0	0	0	0
100365733	Tmem262	mRNA	0	0	0	0	0	0	1	0
100365744	Lrrc75b	mRNA	287	302	269	213	238	243	196	313	0.0928764	0.144079	0.286408
100365773	Oca2	mRNA	13	11	1	11	22	17	14	11	-0.850657	0.00386931	0.0155179
100365779	Zfp605	mRNA	156.15	189.94	164.22	150.44	138.09	166.95	176.83	206.12	-0.0788647	0.315521	0.500984
100365810	LOC100365810	mRNA	23.1	0	7.47	7.84	16.44	0	30.77	0	-0.318192	0.308815	0.495401
100365872	Eif4ebp3	mRNA	119	111	117	105	115	108	133	116	-0.0830457	0.381687	0.570212
100365887	LOC100365887	mRNA
100365921	Pigy	mRNA	147	154	118	156	184	157	187	132	-0.219486	0.00758292	0.0273732
100365928	Fam166b	mRNA	9	23	8	19	20	12	28	24	-0.530256	0.0292098	0.0830164
100365935	Cep85l	mRNA	183.34	203.2	190.37	153.22	131.1	148.2	130.84	185.22	0.273809	0.000569	0.002929
100365995	LOC100365995	mRNA
100366017	Ube2e1	mRNA	1203	1154	1150	1231	1217	1176	1329	1183	-0.0705566	0.0163416	0.0518133
100366024	Prdm16	mRNA	435.52	132.63	210.83	168.58	379.42	486.55	472.07	478.65	-0.959605	4.39e-65	1.15e-62
100366030	LOC100366030	mRNA	22.5	26.5	11.17	29.16	35.74	25.42	23.74	8.51	-0.0850139	0.690447	0.822111
100366044	LOC100366044	mRNA	1005.97	1009.41	1028.75	1044.26	1020.62	986.45	1044.78	908.92	0.0251703	0.433851	0.620465
100366054	LOC100366054	mRNA	4.91	3.93	2.38	5.85	1.55	4.21	4.36	3.16	0.341626	0.515874	0.691506
100366121	Smim24	mRNA	24.86	18.28	18.7	11.03	19.68	23.72	15.27	11.58	0.0322452	0.893652	0.952952
100366216	LOC100366216	mRNA	20.84	13.36	16.08	18.23	22.06	21.82	44.54	10.14	-0.545269	0.0154077	0.0493823
100366231	LOC100366231	mRNA
100366237	Pfdn4	mRNA	304	354	281	404	353	389	364	308	-0.0949044	0.0842062	0.190663
100529260	Ankhd1	mRNA	726	725	752	560	593	686	570	683	0.105377	0.00789995	0.0283501
100534597	Cenps	mRNA	322	328	280	356	394	396	333	389	-0.254149	3.29e-06	2.78e-05
100909392	LOC100909392	mRNA	257.48	297.69	270.37	208.87	275.16	285.01	351.16	290.02	-0.23643	0.000109	0.000674
100909401	Fam181a	mRNA
100909408	Zfp397	mRNA	194	172	171	175	166	157	122	164	0.204853	0.00997968	0.0344243
100909409	LOC100909409	mRNA	1.37	0	3.62	0	2.24	2.4	2.78	0	-0.592961	0.473426	0.655865
100909423	LOC100909423	mRNA
100909425	LOC100909425	mRNA
100909434	LOC100909434	mRNA
100909435	LOC100909435	mRNA
100909438	LOC100909438	mRNA
100909439	LOC100909439	mRNA	2.45	0	2.87	0	0	4.77	3.97	0	-0.736789	0.345678	0.533964
100909441	LOC100909441	mRNA
100909443	LOC100909443	mRNA	14.44	0	0	0	0	0	0	0	4.83142	0.000104	0.000644
100909445	Ube2w	mRNA	475.99	492.94	477.49	555.95	402.38	420.54	477.8	395.86	0.218498	4.27e-06	3.53e-05
100909455	LOC100909455	mRNA	43.24	68.4	83.24	51.38	11.76	61.46	26.38	67.47	0.539148	0.000168	0.000994
100909457	LOC100909457	mRNA
100909461	LOC100909461	mRNA	4.92	0	0	0	0	0	0	0
100909462	LOC100909462	mRNA
100909464	LOC100909464	mRNA	16.1	10.03	38.31	0	0	0	0	30.74	1.04726	0.000616	0.00313905
100909474	LOC100909474	mRNA	15.35	102.98	97.32	81.73	104.99	71.44	80.92	183.2	-0.58758	4.27e-08	5e-07
100909476	LOC100909476	mRNA	94.44	88.9	123.92	63.31	80.99	62.2	118.32	100.49	0.0131748	0.901646	0.957963
100909485	LOC100909485	mRNA
100909486	LOC100909486	mRNA
100909489	Trpc5os	mRNA	0	0	0	0	0	0	0	1
100909493	LOC100909493	mRNA
100909494	LOC100909494	mRNA
100909498	Clec19a	mRNA
100909499	LOC100909499	mRNA
100909501	LOC100909501	mRNA
100909505	LOC100909505	mRNA	358.18	185.26	317.06	312.1	271.79	218.76	313.9	264.86	0.112449	0.0651346	0.156146
100909510	Tsen34l1	mRNA	72.67	187.93	74.89	50.02	92.84	97.18	38.71	64.4	0.374646	0.000761	0.00378116
100909512	LOC100909512	mRNA	269.05	345.86	255.57	235.24	249.23	281.66	305.84	254.2	-0.00115405	0.985044	1
100909517	LOC100909517	mRNA
100909521	LOC100909521	mRNA	17.41	12.13	44.43	0	0	9.53	9.09	9.27	1.38661	4.64e-06	3.81e-05
100909522	LOC100909522	mRNA
100909524	LOC100909524	mRNA
100909526	LOC100909526	mRNA	10.39	6.35	4.74	16.19	14.29	17.97	5.28	12.23	-0.422442	0.173053	0.32677
100909534	LOC100909534	mRNA
100909537	Iqck	mRNA	233	212	226	209	255	205	261	235	-0.140089	0.0375721	0.101732
100909546	LOC100909546	mRNA	0	0	1	0	0	0	0	0
100909548	LOC100909548	mRNA	30.01	23.55	277.78	889.42	19.13	570.26	614.49	4.22	-0.0055419	0.924586	0.972298
100909556	LOC100909556	mRNA	0	0	0	2.59	1.16	0	0	0	1.13825	0.462644	0.646059
100909569	LOC100909569	mRNA	78.43	78.81	72.33	50.79	59.4	73.68	50.02	74.21	0.103191	0.40716	0.594687
100909573	LOC100909573	mRNA
100909578	LOC100909578	mRNA
100909582	LOC100909582	mRNA	10.45	25.66	9.46	20.15	10.11	11.59	24.28	19.99	-0.0260592	0.917453	0.967742
100909585	LOC100909585	mRNA	0	1	0	0	0	0	0	0
100909586	LOC100909586	mRNA	1.32	0	0	0	1.31	0	1.24	3.97	-2.32492	0.0509655	0.128448
100909590	LOC100909590	mRNA	4.06	6.98	7.16	2.08	5.09	3.35	3.94	2.96	0.382178	0.431462	0.618303
100909595	LOC100909595	mRNA	569.9	505.54	425.84	316.25	338.28	259.91	337.61	310.48	0.523769	2.29e-23	1.13e-21
100909596	LOC100909596	mRNA
100909597	LOC100909597	mRNA	172.1	239.17	258.77	224.49	182.68	197.51	207.22	196.52	0.169823	0.0160091	0.0509
100909598	Pigbos1	mRNA	72.35	65.04	83.56	80.65	85.59	74.66	57.12	61.56	0.0921517	0.441761	0.626932
100909599	LOC100909599	mRNA	1.56	4.63	1.89	1.69	1.59	1.76	1.5	0	0.989792	0.20308	0.36865
100909600	LOC100909600	mRNA	0	28	11.54	17	2.93	6	20	10.9	0.484835	0.101628	0.219452
100909604	LOC100909604	mRNA	332.04	396.08	519.2	146.68	210.66	297.94	177.85	276.78	0.512697	1.19e-17	3.64e-16
100909605	LOC100909605	mRNA
100909609	LOC100909609	mRNA	0	0	0	1.21	0	0	1.19	0	0.00346386	0.998516	0.999389
100909612	LOC100909612	mRNA	0	0	0	0	1	0	1	0
100909613	LOC100909613	mRNA
100909620	LOC100909620	mRNA	0	0.87	0	0	0	0	0	0
100909622	Znf442	mRNA	0	0	0	10.54	0	0	0	0	4.37722	0.00115151	0.00544544
100909643	LOC100909643	mRNA	0	1	0	0	0	0	0	0
100909645	LOC100909645	mRNA	225	234.05	244	244	227	238.72	244	201.64	0.0348379	0.602743	0.757512
100909648	LOC100909648	mRNA	0	0	0	0	0	0	0	1
100909657	LOC100909657	mRNA	359	386	378	368	296	319	367	359	0.132389	0.0146848	0.0475311
100909660	LOC100909660	mRNA
100909661	LOC100909661	mRNA
100909664	LOC100909664	mRNA	111.11	121.15	128.4	74.38	59.44	69.37	55.36	140.51	0.401548	0.000136	0.000821
100909671	LOC100909671	mRNA	0	0	0	0	0	0	1	0
100909677	LOC100909677	mRNA
100909679	LOC100909679	mRNA	40.97	47.53	42.47	35.6	40.28	47.17	25.92	47.1	0.0332434	0.834965	0.91783
100909682	LOC100909682	mRNA	15.52	15.67	11.55	16.3	16.11	14.17	28.1	13.89	-0.312286	0.216061	0.385718
100909683	LOC100909683	mRNA
100909688	LOC100909688	mRNA	69.07	69.72	72	55.68	85	49	62.07	54.18	0.0700214	0.581284	0.740654
100909692	LOC100909692	mRNA
100909696	LOC100909696	mRNA
100909697	Slc25a51	mRNA	292.75	275.14	493.3	567.13	350.36	534.07	673.39	416.01	-0.298195	6.07e-10	9.11e-09
100909700	LOC100909700	mRNA	0	3	0	0	0	0	0	0
100909701	Ccer2	mRNA	37	72	77	29	38	51	54	38	0.227765	0.116892	0.244096
100909704	LOC100909704	mRNA	0	0	1.53	0	0	0	1.59	0	-0.0760767	0.962857	0.995347
100909708	LOC100909708	mRNA
100909709	LOC100909709	mRNA	14.39	22.8	24.6	14.48	19.55	12.17	8.66	24.52	0.212316	0.382736	0.571359
100909712	LOC100909712	mRNA	22.08	20.91	15.47	5.39	20.61	30.32	11.52	10.84	-0.219511	0.373538	0.562209
100909715	LOC100909715	mRNA	22.01	39.75	31.14	11.98	22.65	23.98	13.26	33.99	0.139268	0.496528	0.675108
100909725	LOC100909725	mRNA	0	0	0	4.48	0	4.48	0	0	-0.0205816	0.982965	1
100909726	LOC100909726	mRNA
100909732	LOC100909732	mRNA	0	12.87	1.89	0	0	24.61	17.8	0	-1.54329	0.000155	0.000925
100909736	LOC100909736	mRNA
100909750	LOC100909750	mRNA	1799.83	1539.98	1489.3	1197.14	1707.24	1394.23	1505.85	1540.55	-0.0494078	0.0588382	0.14401
100909754	LOC100909754	mRNA
100909755	LOC100909755	mRNA	0	0	0	0	0	0	0	1
100909761	LOC100909761	mRNA	0	0	3.2	0	0	0	0	0
100909776	LOC100909776	mRNA	17	9	9	22	14	14	21	19	-0.275154	0.287276	0.472518
100909784	LOC100909784	mRNA
100909786	LOC100909786	mRNA
100909793	Smim18	mRNA	105	135	127	102	131	143	117	118	-0.138659	0.133035	0.26993
100909794	LOC100909794	mRNA	8.48	2.3	3.13	7.35	5.61	4.16	3.41	2.33	0.434361	0.364292	0.552973
100909795	LOC100909795	mRNA	16.96	0	0	0	0	0	0	0	5.06348	2.28e-05	0.000164
100909796	LOC100909796	mRNA
100909799	LOC100909799	mRNA	20	6	3	1	28	17	14	71	-2.13606	1.3e-16	3.67e-15
100909811	Dcdc1	mRNA
100909824	LOC100909824	mRNA	150.31	121.31	139.9	121.9	88.02	110.27	86.94	104.53	0.432104	6.11e-06	4.9e-05
100909827	Kbtbd7	mRNA	228.55	223	227	186	198	198	220	203	0.0575043	0.413589	0.600916
100909830	LOC100909830	mRNA	0	5.35	0	5.35	0	0	0	5.35	0.979418	0.186688	0.346307
100909831	LOC100909831	mRNA
100909833	LOC100909833	mRNA
100909836	LOC100909836	mRNA
100909840	LOC100909840	mRNA	4055.36	3668.5	3809.99	4417.12	3633.79	3959.37	3417.57	3032.84	0.163153	1.32e-22	6.15e-21
100909844	LOC100909844	mRNA	0	16.33	13.33	0	13.02	0	0	8.97	0.411089	0.308563	0.495257
100909849	LOC100909849	mRNA	18.21	15.78	29.04	0	0	4.47	0	0	3.79711	2.44e-14	5.72e-13
100909856	LOC100909856	mRNA	305.85	269.91	256.99	248.43	301.61	285.99	183.19	307.98	-0.0173622	0.779738	0.881996
100909857	LOC100909857	mRNA	86	104	36	128	94	127	64	105.66	-0.162746	0.123987	0.25539
100909858	LOC100909858	mRNA
100909859	LOC100909859	mRNA	0	1	0	0	1	0	1	0	-1.02058	0.551931	0.721057
100909860	LOC100909860	mRNA	85	75	83	82	95	66	105	88	-0.143891	0.193981	0.355871
100909862	LOC100909862	mRNA
100909864	LOC100909864	mRNA	11.79	25.36	21.11	5.62	2.13	7.78	6.84	16.77	0.909761	0.00241922	0.010416
100909868	LOC100909868	mRNA	1	0	0.8	1	0	0	0	0
100909869	LOC100909869	mRNA	90.99	134.84	88.26	106.78	150	135	122.82	138.98	-0.39822	1.91e-05	0.000139
100909879	LOC100909879	mRNA	0	0	0	0	0	0	1	0
100909884	LOC100909884	mRNA
100909885	LOC100909885	mRNA
100909893	LOC100909893	mRNA	7	3	5	2	4	3	8	7	-0.39255	0.397489	0.585557
100909894	Olr294	mRNA
100909897	LOC100909897	mRNA	0	1	1	1	0	0	0	1	1.56438	0.312922	0.499257
100909899	LOC100909899	mRNA
100909900	LOC100909900	mRNA
100909913	LOC100909913	mRNA	0	0	0	39.29	0	0	0	0	6.27551	9.45e-11	1.56e-09
100909916	LOC100909916	mRNA	0	0	0	3.99	0.54	0.73	0	0.87	0.878196	0.461858	0.645354
100909922	LOC100909922	mRNA
100909935	LOC100909935	mRNA
100909936	LOC100909936	mRNA
100909937	LOC100909937	mRNA
100909940	LOC100909940	mRNA
100909943	LOC100909943	mRNA
100909947	LOC100909947	mRNA	1	13	3	1	2	1	0	14	0.0618805	0.899057	0.956599
100909950	LOC100909950	mRNA	0	1.38	0	0	0	0	0	3.37	-1.30866	0.346226	0.534586
100909954	LOC100909954	mRNA	114	152	175.63	111	93	108.98	107	145	0.263104	0.00390042	0.0156187
100909955	LOC100909955	mRNA	0	0	0	0	0	0	0	1.18
100909958	LOC100909958	mRNA
100909960	LOC100909960	mRNA	0	0	0.32	0	0	0	0	0
100909961	LOC100909961	mRNA
100909964	LOC100909964	mRNA
100909966	LOC100909966	mRNA
100909968	LOC100909968	mRNA
100909976	LOC100909976	mRNA
100909977	LOC100909977	mRNA
100909989	LOC100909989	mRNA
100909993	LOC100909993	mRNA
100909996	Olr1258	mRNA
100909998	LOC100909998	mRNA	103	78	96	79	94	77	96	98	-0.0566008	0.598391	0.753801
100910007	Zfp30	mRNA	48.34	56.04	73.04	27.84	41.87	52.67	38.74	50.63	0.137871	0.34623	0.534548
100910009	LOC100910009	mRNA
100910010	LOC100910010	mRNA
100910018	LOC100910018	mRNA	0	4.57	6.96	0	3.29	3.29	6.54	0	-0.206957	0.722033	0.842632
100910021	LOC100910021	mRNA	129.64	19.3	10.7	56.79	110.96	60	111.45	106.39	-0.865709	4.94e-13	1.02e-11
100910026	LOC100910026	mRNA	0	2	0	0	0	0	1	0	0.979418	0.568084	0.732083
100910033	LOC100910033	mRNA	16.77	15.41	16.66	0	0	2.57	13.19	16.58	0.574162	0.0760457	0.176171
100910041	LOC100910041	mRNA
100910045	LOC100910045	mRNA
100910046	LOC100910046	mRNA	384.06	407.26	387.97	358.47	377.33	423.97	428.84	362.45	-0.0711262	0.167861	0.320035
100910047	Gfy	mRNA	2	0	4	1	2	2	0	3	-0.0205816	0.978707	1
100910049	LOC100910049	mRNA
100910051	LOC100910051	mRNA
100910054	Nkrf	mRNA	54.91	98.95	96.9	74.36	64.81	59.63	65.79	76.17	0.266797	0.024876	0.0728933
100910056	LOC100910056	mRNA	100.3	115.67	107.61	46.33	85.78	105.39	60.7	93.7	0.0776147	0.471947	0.65436
100910057	LOC100910057	mRNA	0	0	1	1	1	0	0	0	0.979418	0.568084	0.732083
100910060	LOC100910060	mRNA
100910061	LOC100910061	mRNA
100910067	LOC100910067	mRNA
100910068	LOC100910068	mRNA	3	1	0	3	1	3	2	2	-0.213227	0.77496	0.878679
100910069	LOC100910069	mRNA	198.44	214.19	235.92	276.36	274.65	231.64	295.6	243.4	-0.1971	0.00245135	0.0105345
100910070	LOC100910070	mRNA
100910077	LOC100910077	mRNA
100910078	LOC100910078	mRNA
100910079	LOC100910079	mRNA	40	62	50	53	77	46	43	54	-0.122461	0.381737	0.570193
100910086	LOC100910086	mRNA
100910087	Adam21	mRNA
100910088	LOC100910088	mRNA	5	10	14	9	2	8	8	8	0.526906	0.147645	0.29155
100910095	LOC100910095	mRNA	0	0	2.01	1	1	5.03	3.01	3.02	-2.02298	0.0149412	0.0481821
100910102	Catsperb	mRNA	0	6	3	3	2	2	4	2	0.242453	0.694088	0.823369
100910104	Xirp1	mRNA	21	8	12	19	19	17	9	16	-0.0444284	0.865502	0.935513
100910106	LOC100910106	mRNA	47.22	39.13	39.85	40.97	43.44	34.01	43.36	28.13	0.146003	0.368695	0.557348
100910107	LOC100910107	mRNA
100910108	LOC100910108	mRNA
100910111	LOC100910111	mRNA
100910117	LOC100910117	mRNA	0	0	6.52	4.43	0	0	0	1.42	2.92639	0.00439647	0.0172877
100910120	LOC100910120	mRNA
100910121	LOC100910121	mRNA	193.05	183.32	174.27	220.78	176.2	157.4	260.85	185.95	-0.0372788	0.610781	0.764206
100910127	LOC100910127	mRNA
100910128	LOC100910128	mRNA
100910130	LOC100910130	mRNA	400	418	423	356	383	514	403	358	-0.0746613	0.139896	0.280403
100910134	LOC100910134	mRNA	3.83	7.86	8.52	1.31	2.62	7.57	6.17	3.66	0.0836545	0.851816	0.928332
100910138	LOC100910138	mRNA
100910143	LOC100910143	mRNA	151.93	263.61	187.54	258.9	232.59	313.84	161.83	240.8	-0.159427	0.0187709	0.0581078
100910144	Ces2	mRNA
100910145	LOC100910145	mRNA
100910153	LOC100910153	mRNA
100910162	LOC100910162	mRNA
100910163	Tcim	mRNA	4.45	0	0	0	0	4.45	0	0	-0.0205816	0.983022	1
100910165	LOC100910165	mRNA
100910169	LOC100910169	mRNA
100910172	LOC100910172	mRNA	0	7	3	4	3	4	2	2	0.327342	0.571942	0.7337
100910173	LOC100910173	mRNA	1.39	1.37	1.39	0	3.44	1.33	2.52	5.81	-1.67897	0.0254478	0.0743664
100910177	LOC100910177	mRNA	32.36	0	97.09	32.36	0	0	32.36	64.73	0.716325	8.47e-05	0.000537
100910180	LOC100910180	mRNA
100910181	LOC100910181	mRNA
100910184	LOC100910184	mRNA	0	0	0	0	0	1.18	0	0
100910187	LOC100910187	mRNA
100910193	LOC100910193	mRNA
100910196	LOC100910196	mRNA	7.03	0	0	0	0	0	0	0	3.79294	0.010912	0.0372408
100910199	LOC100910199	mRNA
100910200	LOC100910200	mRNA	21.1	11.58	14.17	13.6	10.77	9.46	14.39	26.06	-0.0260604	0.920817	0.970006
100910202	Crnkl1	mRNA	193.09	163.28	177.69	160.75	176.32	168.96	141.64	164.37	0.0727368	0.355142	0.543588
100910205	Prss50	mRNA	3	1	3	7	6	1	5	3	-0.120117	0.822666	0.910181
100910207	LOC100910207	mRNA	0	0	0	0	0	0	52.02	0	-6.72158	1.01e-13	2.23e-12
100910223	LOC100910223	mRNA
100910224	LOC100910224	mRNA
100910227	LOC100910227	mRNA
100910231	Zfp82	mRNA	376.71	417.55	455.49	360.04	353.76	410.29	396.67	423.72	0.00231785	0.963787	0.995579
100910235	LOC100910235	mRNA
100910238	LOC100910238	mRNA
100910240	LOC100910240	mRNA	0	0	0	0	3.34	0	0	0
100910243	LOC100910243	mRNA	4.6	0	0.03	4.85	1.24	0	0	2.49	1.32513	0.113236	0.238064
100910245	LOC100910245	mRNA	0	9.33	10.43	13	8.65	10.31	4.99	7.35	0.0451911	0.900254	0.957039
100910247	LOC100910247	mRNA	0.86	0	0	0	1	0	0	2.03	-1.83749	0.252514	0.431616
100910255	LOC100910255	mRNA
100910256	LOC100910256	mRNA
100910258	LOC100910258	mRNA	25.3	30.66	24.3	24.04	19.31	20.49	24.58	23.04	0.234122	0.262148	0.442591
100910260	LOC100910260	mRNA
100910263	LOC100910263	mRNA
100910264	LOC100910264	mRNA
100910265	Cdr1	mRNA	3	0	0	0	0	0	0	0
100910270	LOC100910270	mRNA	12.24	13	17.08	30.08	38.13	17.05	7.16	6.08	0.06099	0.801979	0.896853
100910275	LOC100910275	mRNA	2235.94	2495.02	2647.97	1920.93	1902.47	2215	2055.88	2280.05	0.117096	6.5e-08	7.37e-07
100910278	LOC100910278	mRNA	6.52	6.29	3.81	2.54	7.5	5.18	11.54	6.52	-0.702601	0.0897942	0.200369
100910280	Sdr42e2	mRNA	1	2	2	0	2	1	3	0	-0.283616	0.74493	0.858336
100910284	LOC100910284	mRNA	26.92	246.08	252.78	165.21	0	88.81	665.29	0	-0.146673	0.0534224	0.133211
100910288	LOC100910288	mRNA	31.16	19.01	16.6	23.57	33.56	10.16	4.43	38.41	0.0410828	0.849815	0.92731
100910292	LOC100910292	mRNA
100910294	LOC100910294	mRNA
100910298	LOC100910298	mRNA	0	0	0	0	0	0	0	1
100910299	Larp4	mRNA	227.25	249.76	231.05	198.33	212.09	230.56	152.62	236.85	0.102759	0.137737	0.277291
100910308	LOC100910308	mRNA	198.04	275.87	371.01	125.52	312.39	388.26	258.55	301.42	-0.398004	8.71e-11	1.44e-09
100910314	LOC100910314	mRNA
100910318	Trappc2b	mRNA	282.54	269	233.99	356	308	304	280.99	263	-0.0387418	0.519841	0.694993
100910335	LOC100910335	mRNA
100910342	Bbip1	mRNA	134	74	57	100	110	84	107	87	-0.108742	0.301165	0.48757
100910352	LOC100910352	mRNA	0	0	0	0	0	0	1	0
100910363	LOC100910363	mRNA
100910371	LOC100910371	mRNA	5.01	4.58	4	2	6.67	5.48	5.96	8.68	-0.801655	0.0756888	0.175633
100910378	LOC100910378	mRNA
100910382	LOC100910382	mRNA
100910385	LOC100910385	mRNA	32.78	29.43	40.39	30.78	23.62	29.23	27.58	12.46	0.501366	0.00952531	0.0331819
100910401	Prss51	mRNA	0	0	0	0	0	0	0	1
100910402	LOC100910402	mRNA
100910409	LOC100910409	mRNA
100910410	LOC100910410	mRNA	0	0	1	0	1	0	1	1	-1.60554	0.300359	0.487321
100910418	LOC100910418	mRNA	24.92	6.78	12.04	15.48	17.63	26.61	16.49	20.9	-0.483597	0.0481074	0.123142
100910419	Tle7	mRNA	0	1	1	0	1	0	0	0	0.979418	0.568084	0.732083
100910420	LOC100910420	mRNA
100910431	LOC100910431	mRNA
100910434	Chadl	mRNA	424	514	525	485	535	439	576	549	-0.12829	0.00469001	0.0182229
100910438	LOC100910438	mRNA	181.09	136.03	134.31	121.1	173.45	104.28	118.59	100.48	0.184105	0.0371692	0.10094
100910439	LOC100910439	mRNA
100910445	LOC100910445	mRNA
100910446	LOC100910446	mRNA	78.79	0	142.24	0	0	0	108.62	0	1.00437	8.91e-10	1.31e-08
100910447	LOC100910447	mRNA	3.99	0	0	0	0	0	0	0
100910451	LOC100910451	mRNA	0	0	0	0	0	0	0	1
100910452	LOC100910452	mRNA	2.62	0	0	0	0	0	0	0
100910456	LOC100910456	mRNA
100910460	Ccdc180	mRNA	26	37	37	16	22	34	46	27	-0.173828	0.34603	0.534373
100910462	LOC100910462	mRNA
100910467	LOC100910467	mRNA
100910474	LOC100910474	mRNA	2.16	1.37	0.97	0	0	2.03	0	6.86	-1.00284	0.216397	0.386055
100910478	LOC100910478	mRNA	16.72	25.51	23.75	13.71	18.75	29.4	23.46	25.97	-0.312768	0.149991	0.294991
100910479	LOC100910479	mRNA
100910481	LOC100910481	mRNA	0	2.01	0	1.01	0	0	0	0
100910483	LOC100910483	mRNA	24.98	14.57	7.27	16.91	19.44	12.36	16.29	16.89	-0.0486047	0.848442	0.926419
100910486	LOC100910486	mRNA	3.06	0	0	0	1.79	1.56	3.35	2.53	-1.61338	0.0683053	0.162197
100910488	LOC100910488	mRNA
100910497	LOC100910497	mRNA	0	4.06	0	3	3	0.99	0	0.27	0.708233	0.416266	0.6038
100910500	LOC100910500	mRNA
100910501	LOC100910501	mRNA
100910503	LOC100910503	mRNA
100910506	LOC100910506	mRNA	852.54	865.15	883.16	893.75	729.8	753.9	890.09	761.81	0.135804	0.000128	0.000779
100910508	Zfp41	mRNA	300	268.31	244	200.28	272.76	231	240.27	264	-0.01407	0.826494	0.912515
100910509	LOC100910509	mRNA
100910512	LOC100910512	mRNA
100910526	LOC100910526	mRNA
100910528	LOC100910528	mRNA	0	0	0	0	11.74	0	11.74	0	-5.57394	4.26e-07	4.22e-06
100910536	Elfn2	mRNA	2280.58	2797	2577	1767	1873	2218	2415.37	2505	0.0436409	0.0400359	0.106902
100910540	LOC100910540	mRNA
100910543	LOC100910543	mRNA
100910548	LOC100910548	mRNA
100910554	LOC100910554	mRNA	1	0	0	0	1	0	0	0	-0.0205816	0.991951	0.999178
100910555	LOC100910555	mRNA	4.36	7	0	3	5	7	6	2	-0.498526	0.314469	0.499876
100910557	LOC100910557	mRNA
100910565	LOC100910565	mRNA	0	2.24	0	0	0	0	0	0
100910566	LOC100910566	mRNA
100910567	LOC100910567	mRNA
100910575	LOC100910575	mRNA	13.57	10.19	7.81	13.5	3.84	16.63	20.38	18.77	-0.424211	0.134397	0.271971
100910577	LOC100910577	mRNA	109.82	80.79	90.6	131.4	92.21	96.98	101.62	91.27	0.0903224	0.377702	0.565735
100910579	LOC100910579	mRNA	1.44	5.67	0	1.43	5.51	2.37	4.29	2.35	-0.786315	0.198414	0.362191
100910581	LOC100910581	mRNA
100910585	LOC100910585	mRNA	0	1	2.53	0	0	0	1	0	1.79909	0.226785	0.399799
100910596	LOC100910596	mRNA	15	26	26	26	33	34	35	23	-0.447207	0.0228457	0.068165
100910599	LOC100910599	mRNA
100910606	LOC100910606	mRNA	0	0	0.01	0	0	0	0	0
100910611	LOC100910611	mRNA
100910615	LOC100910615	mRNA	0	1	0	3	5	0	2	1	-1.02058	0.234149	0.409393
100910616	Hmgn5	mRNA
100910623	LOC100910623	mRNA	1	3	8	6	8	8	5	4	-0.494513	0.264276	0.44524
100910636	LOC100910636	mRNA	0	63	60	54	59	66	62	63	-0.51876	0.000226	0.00129403
100910640	LOC100910640	mRNA
100910647	LOC100910647	mRNA
100910650	LOC100910650	mRNA	3	3	3	2	2	4	2	6	-0.368505	0.524602	0.699572
100910656	LOC100910656	mRNA	0	1	0	0	0	0	0	0
100910667	LOC100910667	mRNA
100910668	LOC100910668	mRNA	7.45	11.01	6.93	14	16.12	15.35	16	18.23	-0.758646	0.00799885	0.0286433
100910669	LOC100910669	mRNA	1.07	0	0	0	0	0	2.02	0	-0.937326	0.577496	0.737624
100910678	LOC100910678	mRNA	4.1	0	3.7	27.71	31.32	8.89	0	19.08	-0.760145	0.0116112	0.0392032
100910679	LOC100910679	mRNA
100910682	LOC100910682	mRNA
100910688	LOC100910688	mRNA	78.3	22.77	35.56	84.07	109.85	115.49	72.12	40.19	-0.634024	2.83e-07	2.9e-06
100910696	LOC100910696	mRNA
100910698	LOC100910698	mRNA
100910708	LOC100910708	mRNA	420.93	738.95	558.77	654.61	548.51	645.8	558.07	588.45	-0.000732	0.98611	1
100910710	LOC100910710	mRNA	0	0	0	1.14	0	1.15	0	2.27	-1.60554	0.268819	0.450945
100910714	LOC100910714	mRNA	0	8.01	2.85	0	10.88	8.04	3.01	14.37	-1.76153	0.000119	0.00073
100910717	LOC100910717	mRNA
100910719	LOC100910719	mRNA
100910720	LOC100910720	mRNA	6.76	3.72	6.27	2.04	1.73	0	0	1.89	2.35532	0.000915	0.00444002
100910721	LOC100910721	mRNA	0	0	0	0	0	1.21	0	0
100910725	LOC100910725	mRNA	0	8.33	3.32	4.01	1.87	9.37	2.38	0	0.180776	0.734904	0.851362
100910729	Islr2	mRNA	30	38	50	33	24	26	42	21	0.397644	0.0259114	0.0755046
100910731	LOC100910731	mRNA
100910732	LOC100910732	mRNA	1280.68	968.92	1004.01	1268.4	1130.72	1043.2	1118.32	1045.23	0.0395288	0.197261	0.36066
100910735	Oas1g	mRNA	63.93	53.81	22.66	0	43.56	62.17	80.73	0	-0.429905	0.00735648	0.0266714
100910744	LOC100910744	mRNA
100910750	LOC100910750	mRNA	2.55	5.65	2.93	0	5.18	5.16	2.33	2.72	-0.488121	0.386753	0.575294
100910751	Mtg1	mRNA	237	268	241	313	279	304	276	286	-0.133227	0.0302436	0.0853849
100910753	Dnttip2	mRNA	550	468	451	528	536	483	438	444	0.0504942	0.274633	0.457264
100910754	LOC100910754	mRNA	61.75	35.53	75.53	46.44	61.67	80.07	62.07	95.77	-0.470946	0.00022	0.00126164
100910755	LOC100910755	mRNA	0	3.92	3.82	0	4	0	6.95	0	-0.521107	0.438361	0.624428
100910768	LOC100910768	mRNA	2759.53	3369.95	3459.8	2951.4	3104.54	3565.72	3572.37	3212.92	-0.122167	8.78e-12	1.62e-10
100910771	LOC100910771	mRNA	115.95	34.4	113.44	30.9	38.74	80.04	19.13	41.48	0.695517	2.35e-07	2.45e-06
100910772	Cox7a1	mRNA	47.36	52.06	55.2	13.79	47.43	63.06	78.71	33.38	-0.422928	0.00392236	0.0156929
100910780	Chsy3l	mRNA	0	4.89	0	6.45	8.88	1.02	0	0	0.175339	0.779676	0.882035
100910781	LOC100910781	mRNA	3.55	3.69	0	5	10.17	1	8	5	-1.0022	0.0416303	0.110085
100910790	LOC100910790	mRNA
100910792	LOC100910792	mRNA	1681.74	1889.05	1902.66	1656.65	1519.58	1648.88	1826.79	1536.57	0.105856	1.82e-05	0.000133
100910795	LOC100910795	mRNA	208.04	177.92	206.02	155.1	194.7	254.18	204.22	105.23	-0.0421447	0.570905	0.733038
100910798	LOC100910798	mRNA	1	0	0	1.89	0	0	1.47	3.5	-0.802758	0.443692	0.628454
100910801	LOC100910801	mRNA	0	0	0.28	0	0	0	9.43	0	-5.09434	0.00145814	0.00669837
100910806	Trim15	mRNA	25	32	36	20	24	35	31	69	-0.513286	0.00358329	0.0145427
100910807	LOC100910807	mRNA	145.39	195	175.14	208.92	183.06	172	116.76	153.21	0.192379	0.0144458	0.0468651
100910811	Tmem249	mRNA	3	9	6	5	5	6	4	4	0.255053	0.567616	0.733053
100910813	Lyg2	mRNA
100910814	LOC100910814	mRNA
100910819	LOC100910819	mRNA	0	1.31	0	0	0	0	0	2.02	-0.64537	0.686624	0.818782
100910822	LOC100910822	mRNA
100910823	Derl2	mRNA	425	353	354	395	371	336	385	321	0.091357	0.0861327	0.19378
100910829	LOC100910829	mRNA
100910833	LOC100910833	mRNA	5.37	8.09	5.63	2.75	4.06	2.65	6.69	2.68	0.421124	0.371572	0.560171
100910837	LOC100910837	mRNA
100910838	LOC100910838	mRNA	0	7.33	6.59	11.89	10.63	0	20.1	0	-0.272299	0.478776	0.660928
100910839	Luzp2	mRNA	3937.54	2801.44	3589.38	3590.8	3531.57	3396.79	3032.47	2941.75	0.088831	4.64e-07	4.57e-06
100910843	LOC100910843	mRNA
100910848	LOC100910848	mRNA	28.89	17.33	30.06	32.66	21.55	16.75	28.23	17.58	0.352603	0.0908611	0.201963
100910851	LOC100910851	mRNA
100910852	LOC100910852	mRNA	13.27	11	10.41	7	5	5.03	9.04	3	0.896687	0.0155029	0.0496006
100910854	LOC100910854	mRNA	141.27	150.82	178.58	165.94	103.22	138.48	165.89	142.5	0.190161	0.02337	0.0694352
100910858	LOC100910858	mRNA
100910863	LOC100910863	mRNA
100910864	LOC100910864	mRNA	114.72	104.36	106.45	100.68	55.51	67.29	111.34	79.01	0.424129	7.09e-05	0.000458
100910867	Cfap69	mRNA	226	240	237	132	150	196	237	190	0.0907262	0.207515	0.374255
100910872	Naa80	mRNA	914.73	1265.01	769.84	786.3	1082.18	950.38	1133.44	906.52	-0.145055	8.98e-06	6.95e-05
100910875	LOC100910875	mRNA	82.22	130.41	87.89	107.73	99.23	116.24	124.74	104.9	-0.145291	0.141483	0.282935
100910876	LOC100910876	mRNA
100910877	LOC100910877	mRNA	0	0	0	0	0	0	3	0
100910879	LOC100910879	mRNA	2.71	2.57	7.16	4.32	4.65	4.4	3.78	0	0.364919	0.493396	0.672346
100910882	LOC100910882	mRNA	914.2	912.28	1185.1	1143.57	1222.98	1207.05	1522.88	1161.27	-0.320184	1.64e-26	9.75e-25
100910885	LOC100910885	mRNA	52.77	32.77	19.03	44.3	35.15	38.6	64.54	28.19	-0.181877	0.263352	0.44405
100910887	LOC100910887	mRNA
100910893	LOC100910893	mRNA
100910894	LOC100910894	mRNA
100910896	LOC100910896	mRNA
100910899	LOC100910899	mRNA
100910905	LOC100910905	mRNA	15	8	6	13	13	9	9	8	0.0863336	0.787776	0.887144
100910912	LOC100910912	mRNA	22.19	18.87	25.81	11.32	10.9	26.99	7.24	16.98	0.311577	0.202362	0.367857
100910915	LOC100910915	mRNA	0	0	1.89	0	0	0	0	0
100910917	LOC100910917	mRNA
100910928	LOC100910928	mRNA
100910934	LOC100910934	mRNA	2.48	4.01	0	0	0	0	0	0	3.67764	0.0155507	0.0497101
100910936	LOC100910936	mRNA
100910939	LOC100910939	mRNA
100910940	Evi2b	mRNA	50	43	44	47	78	46	70	45	-0.397886	0.00474139	0.0183952
100910942	LOC100910942	mRNA
100910944	LOC100910944	mRNA	0	33.27	30.9	33.27	0	0	0	57.81	0.732613	0.00186563	0.00827762
100910953	LOC100910953	mRNA
100910954	LOC100910954	mRNA	2.84	0.91	0	1.89	2.95	4.09	1.89	3.05	-1.10744	0.119656	0.24848
100910957	LOC100910957	mRNA	366.88	251.63	282.5	284.08	333.28	252.62	252.3	211.8	0.154026	0.0116877	0.0393962
100910977	LOC100910977	mRNA
100910978	LOC100910978	mRNA	69.75	49.08	39.41	41.6	53.94	51.23	96.95	54.7	-0.382494	0.0047762	0.0185146
100910979	LOC100910979	mRNA	36.88	6.98	30.35	0	45.78	23.72	26.24	27.45	-0.751781	0.000315	0.0017325
100910984	Alkal1	mRNA
100910990	LOC100910990	mRNA	260.04	237.03	356.01	266.93	423.18	312.66	373.03	300.25	-0.351864	9.79e-10	1.43e-08
100910993	LOC100910993	mRNA
100910996	LOC100910996	mRNA	456	451	523	356	426	381	500	386	0.0565685	0.247602	0.425322
100910997	LOC100910997	mRNA	2	0	0	1	1.39	0	1	0	0.30737	0.805277	0.89906
100910999	LOC100910999	mRNA
100911002	LOC100911002	mRNA	1	0	0	0	1	0	1	0	-1.02058	0.551931	0.721057
100911015	LOC100911015	mRNA
100911022	LOC100911022	mRNA
100911027	LOC100911027	mRNA	3.11	0	0	0	1.86	3.81	0	3.08	-1.51295	0.0903251	0.201137
100911034	LOC100911034	mRNA
100911035	LOC100911035	mRNA
100911041	Tmem45a	mRNA	12	0	0	15	8	7	14	9	-0.513622	0.154222	0.300857
100911042	LOC100911042	mRNA
100911043	LOC100911043	mRNA
100911044	LOC100911044	mRNA
100911047	LOC100911047	mRNA	0	9.47	0	4.57	3.93	3.17	4.24	3.37	-0.0878359	0.870357	0.938048
100911064	LOC100911064	mRNA
100911068	LOC100911068	mRNA	271.36	214	214.47	203.14	186.27	194.63	172.09	191.15	0.258522	0.000286	0.00159336
100911069	Mtfr2	mRNA	47	52	58	31	34	61	59	47	-0.117044	0.4238	0.610763
100911090	LOC100911090	mRNA
100911101	LOC100911101	mRNA	4	3	2	5	5	4	3	1	0.0863336	0.876488	0.942079
100911104	LOC100911104	mRNA	4	6	3	0	5	4	22	6	-1.5296	0.000446	0.00236421
100911106	LOC100911106	mRNA	0	0.02	6.01	0	2.85	0	5.01	0	-0.402953	0.604312	0.758547
100911107	LOC100911107	mRNA	0	0	0	0	0	1.04	0	0
100911109	LOC100911109	mRNA
100911127	LOC100911127	mRNA
100911129	LOC100911129	mRNA
100911130	LOC100911130	mRNA	0	0	0	20.07	0	0	0	0	5.30639	3.67e-06	3.08e-05
100911132	LOC100911132	mRNA	5	2.01	1	1	12.02	7.01	7.03	30.04	-2.65898	6.43e-10	9.63e-09
100911140	LOC100911140	mRNA
100911147	LOC100911147	mRNA
100911148	LOC100911148	mRNA	0.03	0	9.87	0	5.15	0.02	15.12	9.09	-1.58992	0.00129002	0.00601964
100911153	LOC100911153	mRNA
100911156	LOC100911156	mRNA	0	0	0	4.3	0	0	0	0
100911163	LOC100911163	mRNA
100911165	Mylk4	mRNA
100911166	LOC100911166	mRNA	42.35	34.05	43.87	24.22	31.1	27.17	7.83	20.86	0.711964	0.00022	0.00126494
100911168	LOC100911168	mRNA	6.08	0	36.76	1.65	0	0.6	0	0	6.19179	5.27e-12	9.96e-11
100911180	LOC100911180	mRNA	32.01	25.78	27.13	17.97	9.36	30.38	15.1	21.86	0.403223	0.0624982	0.150951
100911184	LOC100911184	mRNA
100911186	LOC100911186	mRNA	0	0	0	0	42.56	0	85.12	0	-8.01697	1.16e-28	7.84e-27
100911190	LOC100911190	mRNA	19.5	7.66	3.67	5.95	12.99	13.54	7.82	4	-0.0808867	0.808035	0.901096
100911196	LOC100911196	mRNA	644	648	622	489	525	541	583	634	0.0533242	0.2059	0.372295
100911204	LOC100911204	mRNA	0	0	0	0	1.06	0	0	0
100911206	LOC100911206	mRNA
100911215	LOC100911215	mRNA	2	4	2	2	3	3	5	8	-0.946581	0.0849768	0.191958
100911216	LOC100911216	mRNA	135.57	169.03	146.24	140.51	91.44	85.94	160.86	126.2	0.327938	0.000234	0.00132934
100911217	LOC100911217	mRNA
100911224	LOC100911224	mRNA	39.59	19.47	47.28	36.37	31.7	25.63	35.93	27.77	0.21714	0.222429	0.394129
100911225	LOC100911225	mRNA	344.71	321.66	245.04	323.23	388.03	341.79	316.85	312.79	-0.159525	0.00488787	0.0188995
100911229	LOC100911229	mRNA	0	0	0	1	0	0	0	0
100911233	LOC100911233	mRNA	5.3	7.27	8.32	0	7.32	5.64	0	0	0.668165	0.184039	0.342468
100911235	Med7	mRNA	129	109	85	126	140	114	127	114	-0.161295	0.0860657	0.193677
100911237	LOC100911237	mRNA	12.55	12.42	7.11	10.32	11.79	15.11	16.06	16.17	-0.500408	0.082646	0.18792
100911238	LOC100911238	mRNA	835.25	591.5	585	1147.25	1082.25	682.5	630.5	520	0.0952667	0.0101022	0.0348011
100911241	LOC100911241	mRNA
100911244	LOC100911244	mRNA	42.12	0	0	0	39.52	50.39	40.96	40.11	-2.04183	2.99e-20	1.17e-18
100911247	LOC100911247	mRNA
100911248	LOC100911248	mRNA	1229	1189	1274	1049	982	1134	1114	1150	0.0936789	0.00193768	0.00856204
100911249	Ifnl1	mRNA
100911251	LOC100911251	mRNA	5	1	1	1	0	0	3	3	0.394456	0.610829	0.763927
100911256	LOC100911256	mRNA	0	13.04	11.15	8.85	11.11	10.98	0	4.65	0.284633	0.446901	0.631731
100911260	LOC100911260	mRNA	980.97	1075.16	1066.88	804.9	878.99	1027.07	1168.68	1067.18	-0.0971194	0.00250063	0.0107137
100911261	LOC100911261	mRNA	112.02	84.44	64.12	89.17	77.35	125.69	310.73	76.4	-0.775388	5.47e-16	1.45e-14
100911264	LOC100911264	mRNA
100911272	LOC100911272	mRNA
100911278	LOC100911278	mRNA	1	0	0	0	1	0	1	0	-1.02058	0.551931	0.721057
100911283	LOC100911283	mRNA
100911295	LOC100911295	mRNA	16.31	32.62	16.31	0	16.31	0	0	16.31	0.979418	0.00111217	0.00527848
100911302	LOC100911302	mRNA	62.14	47.9	56.12	27.27	38.31	32.64	59.65	35.66	0.197789	0.194214	0.356227
100911305	LOC100911305	mRNA	199	200	172	206	170	187	181	185	0.0833373	0.26345	0.444175
100911312	LOC100911312	mRNA
100911313	LOC100911313	mRNA	105.77	12.52	31.39	0	0	0	0	22.51	2.71266	4.08e-24	2.14e-22
100911315	LOC100911315	mRNA
100911319	LOC100911319	mRNA	1215.45	1137.8	989.61	1036.96	1326.53	1119.79	1342.45	1189.76	-0.20543	5.95e-12	1.12e-10
100911320	LOC100911320	mRNA	112	120.02	109	101	107	119	108	120	-0.0591623	0.539385	0.712337
100911326	LOC100911326	mRNA
100911331	LOC100911331	mRNA	0	0	0	0	0.83	0	0	0
100911348	LOC100911348	mRNA
100911353	LOC100911353	mRNA	4.15	8.01	3	10	5	8	3	7	0.108916	0.793453	0.8914
100911356	LOC100911356	mRNA	594.5	668.5	732.08	630.61	645.1	668.38	470.39	612.23	0.111427	0.00623279	0.0232036
100911357	LOC100911357	mRNA	162	167	169	183	193	174	183.87	162	-0.0865658	0.262729	0.443286
100911358	LOC100911358	mRNA
100911359	LOC100911359	mRNA
100911365	LOC100911365	mRNA	50.69	0	52.56	4.71	17.81	16.43	0	14.82	1.1173	2.99e-06	2.54e-05
100911366	LOC100911366	mRNA
100911372	LOC100911372	mRNA	0	48.22	77.15	28.93	57.86	9.64	48.22	57.86	-0.190444	0.232428	0.407472
100911374	LOC100911374	mRNA	88	91	107	103.86	81.86	79	74	83	0.273983	0.0117497	0.0395762
100911376	LOC100911376	mRNA
100911379	LOC100911379	mRNA	17.5	16.95	14.44	14.57	18.25	10.53	18.59	20.75	-0.122813	0.625484	0.77561
100911380	LOC100911380	mRNA
100911383	LOC100911383	mRNA	0	0	0	4.02	2	3.51	1.94	0.85	-1.0665	0.208998	0.376004
100911394	LOC100911394	mRNA	0	0	0	1	0	0	0	0
100911395	Agbl4	mRNA	34.26	61.23	42.69	44.92	40.06	58.91	57.86	53.27	-0.219026	0.132721	0.269533
100911398	LOC100911398	mRNA
100911399	LOC100911399	mRNA	4.65	8.55	3.54	6.58	9.54	0	2.57	2.97	0.60835	0.196626	0.359679
100911402	LOC100911402	mRNA	52.9	53.29	52.22	75.75	28.78	79.88	54.15	26.55	0.285781	0.0420934	0.111005
100911403	Ms4a4e	mRNA	5.7	5.7	0.76	17	4	3	15	9	-0.108859	0.769857	0.875576
100911405	LOC100911405	mRNA
100911408	LOC100911408	mRNA	48.01	55.77	40.55	53.22	36.73	40.83	45.21	49.79	0.174538	0.245067	0.422235
100911413	LOC100911413	mRNA	0	0	1.82	0	0	0	11	1	-2.74161	0.00367347	0.0148791
100911417	LOC100911417	mRNA	2637	2933	2611	3127	2832	2923	2940	2737	-0.0363156	0.05768	0.141611
100911422	LOC100911422	mRNA	487.39	643.88	800.46	460.55	357.78	490.93	551.16	1244.59	-0.165169	4.9e-05	0.000328
100911426	LOC100911426	mRNA	1	0	0	0	0	0	0	0
100911428	LOC100911428	mRNA	1.24	3.32	0	0	1.16	1.06	1.06	2.21	-0.288354	0.751898	0.862973
100911434	LOC100911434	mRNA
100911438	LOC100911438	mRNA
100911440	LOC100911440	mRNA
100911453	LOC100911453	mRNA	26.1	24.64	0	0	26.1	0	0	0	0.938492	0.00552218	0.0209715
100911456	LOC100911456	mRNA	0	0.15	0.58	0.6	8.55	0	0	0	-2.70508	0.014903	0.0481266
100911458	LOC100911458	mRNA	0	2.69	3.09	1	0	3	0	0	1.15574	0.228978	0.40285
100911462	Txnl4a	mRNA	399.01	384.41	334.67	505.48	390.03	343.74	383.79	428.98	0.0495438	0.33372	0.520629
100911463	LOC100911463	mRNA
100911464	LOC100911464	mRNA	0	0	1	0	0	0	0	0
100911483	Ndufa13	mRNA	1860	1980	1778	2233	2202	2450	2153	2042	-0.192894	6.05e-18	1.91e-16
100911485	LOC100911485	mRNA	17.44	26.66	31.61	18.13	24.16	16.74	35.46	57.4	-0.531953	0.0057847	0.0217788
100911486	LOC100911486	mRNA	3.32	3.47	13.7	0	0	0	3.28	9.16	0.699352	0.170803	0.323423
100911489	LOC100911489	mRNA
100911492	LOC100911492	mRNA	3.97	4.1	4.47	7.66	3.56	2.27	4.64	6.92	0.195516	0.678238	0.811953
100911495	LOC100911495	mRNA	2.28	0	0.59	0	0	0	0	0
100911507	LOC100911507	mRNA
100911510	LOC100911510	mRNA	10.2	14	10	15	10	19	13	14	-0.20735	0.461544	0.645162
100911511	LOC100911511	mRNA	570.19	746.86	708.32	527.07	533.78	638.57	656.33	639.51	0.027842	0.494172	0.673103
100911515	LOC100911515	mRNA	0	40.58	0	10.14	20.29	0	20.29	10.14	-0.0205816	0.942727	0.983584
100911516	LOC100911516	mRNA	0	23.25	23.25	23.25	23.25	69.75	46.5	46.5	-1.43562	5.93e-14	1.33e-12
100911519	LOC100911519	mRNA	192.31	157.13	195.81	98.29	120.59	139.92	120.09	119.13	0.344299	5.85e-05	0.000385
100911527	LOC100911527	mRNA
100911528	LOC100911528	mRNA
100911529	LOC100911529	mRNA
100911537	LOC100911537	mRNA	0	0	2.2	0	0	0	0	0
100911545	LOC100911545	mRNA	233.95	109.18	202.76	109.18	140.37	93.58	140.37	109.18	0.417552	1.2e-06	1.1e-05
100911547	LOC100911547	mRNA
100911548	LOC100911548	mRNA	7.36	11.79	16.73	1.26	0	0	15.93	0	1.20065	0.00370409	0.0149799
100911549	LOC100911549	mRNA	1.29	3.75	6.13	2.55	7.38	0	0	2.66	0.42994	0.470337	0.65282
100911558	LOC100911558	mRNA
100911562	LOC100911562	mRNA	0	0	0	7.73	0	7.45	0	0	0.0326464	0.964841	0.996105
100911564	LOC100911564	mRNA	9	0	0	4.27	0	0	0	0	4.70951	0.000212	0.00122468
100911565	LOC100911565	mRNA	0	0	0	0	2	0	1	1
100911569	LOC100911569	mRNA
100911571	LOC100911571	mRNA
100911572	LOC100911572	mRNA	97.48	93.73	101.02	124.94	103.02	104.69	108	87.2	0.0295962	0.768972	0.875222
100911575	LOC100911575	mRNA	36.58	26.13	28.74	41.8	49.64	31.35	49.64	52.26	-0.477422	0.00345893	0.0141068
100911576	LOC100911576	mRNA	1808.4	2123.3	1892.93	1824.8	1715.81	1991.83	1827.94	1786.08	0.0425999	0.0708595	0.166878
100911581	Faah	mRNA	22.22	88.86	33.32	44.43	22.22	11.11	44.43	11.11	1.06674	2.67e-09	3.72e-08
100911583	LOC100911583	mRNA
100911585	LOC100911585	mRNA	1.15	0	148.2	3.13	2.44	0.1	0	0	5.88707	1.63e-37	1.76e-35
100911586	LOC100911586	mRNA
100911588	LOC100911588	mRNA	1.62	0	0	0	0	0	0	0
100911597	Myh9l1	mRNA	657.6	519.15	484.54	726.82	553.77	380.71	242.27	553.77	0.444082	9.81e-23	4.67e-21
100911599	LOC100911599	mRNA	210.18	197.91	172.4	213.14	205.18	201.85	250.13	256.67	-0.224041	0.00135274	0.0062724
100911610	LOC100911610	mRNA	335.72	338.45	331.38	244.17	237.21	396.22	448.07	230.54	-0.0907884	0.111304	0.235054
100911615	LOC100911615	mRNA
100911622	LOC100911622	mRNA	12.45	18.69	18.61	5.5	17.06	4.39	10.95	8.52	0.412587	0.163186	0.313569
100911625	LOC100911625	mRNA	370.96	346.61	696.09	206.38	48.76	377.55	99.69	95.8	1.36093	4.01e-99	2.16e-96
100911628	LOC100911628	mRNA
100911639	LOC100911639	mRNA	2	2	4	2	1	2	2	1	0.716384	0.328452	0.51447
100911649	LOC100911649	mRNA
100911660	LOC100911660	mRNA	21.48	14.31	30.72	15.48	18.08	54	25.07	20	-0.535419	0.00937742	0.0327352
100911661	LOC100911661	mRNA	31	29	42	33	76	34	41	35	-0.482925	0.00288627	0.0120833
100911664	LOC100911664	mRNA	2105.27	1917	2068	2032	1939	1960	2167	1996	-0.00983641	0.664492	0.803637
100911668	LOC100911668	mRNA	240.53	390.78	371.79	223.53	209.11	234.84	301.83	273.11	0.24712	5.13e-05	0.000341
100911669	P3r3urf	mRNA	2.72	1.15	1.22	2.89	6.61	3.96	7.41	4.36	-1.50575	0.00700201	0.0256451
100911672	LOC100911672	mRNA	0	294.31	100.74	414.36	0	780.65	0	402.98	-0.568857	2.71e-18	8.95e-17
100911674	LOC100911674	mRNA	303.97	133.25	0	227.36	127.27	2.87	244.89	134.63	0.362326	1.83e-05	0.000134
100911675	LOC100911675	mRNA	0	0	2.92	0	5.23	0	4.1	0	-1.69649	0.0574734	0.141236
100911679	LOC100911679	mRNA	0	0	0	0	0	0	0	1
100911681	LOC100911681	mRNA
100911682	Actl10	mRNA	2	5	4	2	2	3	2	1	0.679858	0.287272	0.472596
100911685	LOC100911685	mRNA	0	38.75	0.25	3.87	8.03	2.67	7.08	0	1.24913	0.00129557	0.00604402
100911689	LOC100911689	mRNA
100911692	LOC100911692	mRNA
100911693	LOC100911693	mRNA	81.41	36.83	123.21	0	65.42	50.12	19.16	72.35	0.201164	0.140395	0.281251
100911695	LOC100911695	mRNA	0	0	0	0	5	1	2	3	-4.48001	0.000772	0.00382603
100911699	Zfp664	mRNA	0	2.79	0	5.05	0	2.87	0	8.25	-0.524813	0.431864	0.618686
100911700	LOC100911700	mRNA	20.52	17.89	23.63	13.23	31.94	13.78	25.2	9.25	-0.111569	0.629828	0.778678
100911713	LOC100911713	mRNA
100911718	LOC100911718	mRNA
100911725	LOC100911725	mRNA	26.49	0	0	18.75	0	0	0	0	6.47895	4.35e-12	8.32e-11
100911727	LOC100911727	mRNA	128.6	80.8	21.11	0	89.4	0	204.9	7.8	-0.410778	0.00107299	0.00511506
100911728	LOC100911728	mRNA	1.74	1.64	0	1.8	0	0	0	2.13	1.26152	0.259784	0.439815
100911730	LOC100911730	mRNA	0	117.28	0	0	0	0	0	0	7.85323	1.71e-26	1.01e-24
100911733	LOC100911733	mRNA	0	0	2.45	0	1.66	4.12	0	0	-1.25887	0.231332	0.406056
100911734	LOC100911734	mRNA	870.86	1043.56	1035.7	867.58	822.74	912.96	932.36	940.44	0.0607229	0.0697901	0.164847
100911740	Mrln	mRNA
100911744	LOC100911744	mRNA
100911751	LOC100911751	mRNA	3.75	3.6	9.33	5.65	5.79	7.47	1.51	9.19	-0.122226	0.773254	0.87786
100911757	Tshz2	mRNA	2177.68	2278.27	2399.68	1760.46	1708.93	1764.69	2156.85	2185.66	0.119997	9.91e-08	1.1e-06
100911758	LOC100911758	mRNA
100911761	LOC100911761	mRNA	7.23	3.14	5.94	2.92	6.15	6.02	4.64	2.14	0.000579	0.99901	0.999665
100911766	LOC100911766	mRNA	113.21	97.27	49.69	137.53	118.09	81.27	138.69	25.46	0.109104	0.297069	0.484105
100911769	LOC100911769	mRNA	0	3.15	5.71	10.81	0	4.5	0	21.65	-0.431396	0.313956	0.49932
100911772	LOC100911772	mRNA
100911776	LOC100911776	mRNA	13.66	10.62	9.11	27.32	25.8	22.77	25.8	18.21	-0.629348	0.00756568	0.0273271
100911779	LOC100911779	mRNA	101.29	91.43	109.73	127.3	109.49	117.34	105.16	134.19	-0.137971	0.152517	0.298643
100911784	LOC100911784	mRNA	0.17	0	0	0	0.11	2	0	0.21	-3.7911	0.140877	0.281969
100911790	LOC100911790	mRNA	2	1	0	0	0	0	0	1	1.56438	0.312922	0.499257
100911795	Erich6b	mRNA	5.46	1.45	3.02	1.02	6.82	1.21	2.02	5.52	-0.52842	0.349334	0.53798
100911796	LOC100911796	mRNA	57	56	46	51	79	36	68	60	-0.231149	0.088605	0.198005
100911797	LOC100911797	mRNA
100911798	Seh1l	mRNA	364	407	358	393	318	357	373	364	0.0876467	0.100007	0.216871
100911800	LOC100911800	mRNA
100911801	LOC100911801	mRNA
100911804	LOC100911804	mRNA	0	0	0	0	0	0	1	0
100911807	LOC100911807	mRNA	16.61	8.96	16.14	6.16	13.08	12.57	10.61	14.06	-0.0925917	0.750534	0.862163
100911813	LOC100911813	mRNA	12.81	22.68	13.76	14.46	22.93	16.12	12.77	22.15	-0.236002	0.33786	0.525388
100911814	LOC100911814	mRNA	0	0	4.68	0	0	3.21	0	0	0.523354	0.613553	0.766
100911818	LOC100911818	mRNA
100911825	LOC100911825	mRNA	9	75.88	25.05	0	0	0	101.45	7.83	-0.0120259	0.950795	0.989354
100911831	Zfp182	mRNA	231	249	225	212	196	216	236	215	0.0669796	0.327498	0.513547
100911832	Rtl5	mRNA	869	1106	1252	685	601	812	980	943	0.209205	7.13e-10	1.06e-08
100911837	LOC100911837	mRNA	104.26	85.67	53.88	241.04	6.59	201.19	44.88	128.94	0.324896	0.000958	0.00462924
100911839	LOC100911839	mRNA
100911840	LOC100911840	mRNA	25.63	30.76	35.89	25.63	15.38	15.38	25.63	30.76	0.415532	0.0403086	0.107427
100911842	LOC100911842	mRNA
100911845	LOC100911845	mRNA
100911847	LOC100911847	mRNA	756.89	401.09	446.37	866.86	918.62	608.1	601.63	582.22	-0.15396	0.000124	0.000753
100911848	LOC100911848	mRNA	51.03	57.44	70.16	49.57	53.25	42.32	57.15	49.93	0.150727	0.278648	0.462227
100911854	LOC100911854	mRNA	0	11.67	8.33	1.38	1.15	1.02	1.55	2.45	1.77234	0.00324015	0.0133392
100911855	LOC100911855	mRNA	9.49	7.46	4.96	3.61	6.15	0	8.05	10.9	0.00335935	0.993391	0.996328
100911857	LOC100911857	mRNA	0	0	0	1.42	0	0	0	0
100911859	Hoxc11	mRNA	63	117	232	117	26	155	133	156	0.150025	0.100592	0.21783
100911860	LOC100911860	mRNA
100911865	LOC100911865	mRNA	15.67	0.5	0	0	0	15.86	4.34	7.22	-0.782491	0.0784237	0.180515
100911867	LOC100911867	mRNA	0	0	5.46	0	4.27	0	0	2.64	-0.360366	0.661566	0.801474
100911870	LOC100911870	mRNA
100911871	LOC100911871	mRNA	123.29	135.85	149.63	134.71	164.31	177.79	109.59	199.2	-0.280768	0.00079	0.00390937
100911881	LOC100911881	mRNA	48.63	55.58	27.79	34.74	97.27	27.79	83.37	49.24	-0.648506	4.73e-06	3.87e-05
100911886	LOC100911886	mRNA
100911887	LOC100911887	mRNA	25.22	22.29	30.65	31	20.82	21.86	15	25	0.380252	0.0692816	0.164048
100911888	LOC100911888	mRNA
100911893	LOC100911893	mRNA
100911914	LOC100911914	mRNA	10.03	19.31	27.47	14.53	21.39	10.13	17.24	17.98	0.0755779	0.758303	0.867336
100911917	LOC100911917	mRNA	8.47	0	16.93	0	0	0	8.47	0	1.56381	0.00333025	0.0136519
100911925	LOC100911925	mRNA
100911928	LOC100911928	mRNA
100911932	LOC100911932	mRNA	120	141	104	128	129	117	154	119	-0.0947285	0.296373	0.483357
100911936	LOC100911936	mRNA
100911937	LOC100911937	mRNA
100911938	LOC100911938	mRNA
100911939	LOC100911939	mRNA
100911941	LOC100911941	mRNA
100911944	LOC100911944	mRNA
100911949	Odaph	mRNA	15.5	19	16.7	20	22.56	8.37	21	15	0.0686426	0.779835	0.882051
100911951	LOC100911951	mRNA	4.13	18.79	3.37	102.13	87.47	110.23	168.71	35.12	-1.66522	9.15e-35	8.69e-33
100911956	LOC100911956	mRNA
100911958	LOC100911958	mRNA
100911959	LOC100911959	mRNA	455.49	281.42	118.68	370.3	480.64	540.19	961.82	428.05	-0.996204	3.93e-91	1.89e-88
100911964	LOC100911964	mRNA	0	1.13	1.28	0	0	0	1.57	0	0.597687	0.682854	0.815666
100911970	Mipol1	mRNA	119	84.11	102	101	106.36	107	107	82.14	-0.00769985	0.939511	0.981571
100911971	Spata31e1	mRNA
100911976	LOC100911976	mRNA
100911982	LOC100911982	mRNA
100911983	LOC100911983	mRNA
100911984	LOC100911984	mRNA	0	3	1	1.41	0	1	1	0	1.41505	0.20843	0.375388
100911986	LOC100911986	mRNA	17.32	45.47	41.2	25.29	42.76	38.37	16.74	35.89	-0.0697293	0.695118	0.823977
100911988	LOC100911988	mRNA
100911993	LOC100911993	mRNA	5.7	2.99	15.8	6.27	11.38	12.1	22.27	16.49	-1.03737	0.00077	0.00381983
100911994	LOC100911994	mRNA	0	0	5.35	3.13	0	0	0	0	4.06348	0.00426377	0.0168273
100911999	LOC100911999	mRNA
100912008	LOC100912008	mRNA	192.09	108	159.77	153.22	190.36	96.88	95.62	183.12	0.0947427	0.259722	0.43975
100912009	LOC100912009	mRNA	0	3.07	0	0	0	0	0	0
100912012	Clec3b	mRNA	29	24	22	29	38	30	82	26	-0.779574	8.82e-06	6.83e-05
100912013	LOC100912013	mRNA
100912019	LOC100912019	mRNA	3.62	0	1.48	0	5.94	4.98	13.77	19.29	-3.12886	2.94e-09	4.07e-08
100912021	LOC100912021	mRNA
100912026	LOC100912026	mRNA
100912028	LOC100912028	mRNA	1	5	2	0	1	0	4	2	0.172063	0.817546	0.907037
100912032	Rps27a	mRNA	3755	3526	3450	4655	4246	4169	3921	3493.23	-0.0615545	0.000164	0.000973
100912034	LOC100912034	mRNA	0	0	0	0	20.07	0	20.07	0	-6.34755	4.55e-11	7.84e-10
100912038	LOC100912038	mRNA
100912042	LOC100912042	mRNA	24.5	46.66	46.88	20.18	26.31	141.1	54.92	52.18	-1.01047	4.77e-12	9.08e-11
100912052	LOC100912052	mRNA	5.4	0	0	9.2	2.42	0	9.57	0	0.263555	0.638446	0.785199
100912059	LOC100912059	mRNA	641.17	595.7	571.18	586.28	604.18	581.34	657.19	587.07	-0.0417853	0.314486	0.499859
100912062	LOC100912062	mRNA	37.79	38.04	42.89	27.23	38.43	24.97	41.97	45.41	-0.0675525	0.68675	0.81888
100912067	LOC100912067	mRNA
100912068	LOC100912068	mRNA	16.67	25.12	45.68	29.53	34.99	31.88	37.94	28.32	-0.206909	0.257235	0.436671
100912070	LOC100912070	mRNA	9.68	2.13	0	2.45	0	0	7.16	1.47	0.70396	0.250473	0.428927
100912076	LOC100912076	mRNA	28.45	31.09	22.12	26.65	28.63	31.15	23.24	21.26	0.0341223	0.863112	0.934583
100912096	Zfp113	mRNA	59	50	54	60	46	63	45	55	0.0729592	0.599289	0.754724
100912097	LOC100912097	mRNA
100912104	LOC100912104	mRNA
100912108	Nupr1	mRNA	27	29	14	54	35	40	46	18	-0.185326	0.297973	0.485276
100912114	LOC100912114	mRNA	0	0	1	0	0	0	0	2	-1.02058	0.551931	0.721057
100912115	Mia2	mRNA	704	557	531	555	610	648	630	617	-0.114574	0.00568711	0.0214732
100912132	LOC100912132	mRNA
100912135	LOC100912135	mRNA
100912139	LOC100912139	mRNA	0	0	1	0	0	0	0	0
100912141	Tro	mRNA	1452	1866	1857	1292	1263	1463	1730	1579	0.0791612	0.0021632	0.00944916
100912151	LOC100912151	mRNA	348.04	321	303	397	276	266	277	307	0.261376	6.36e-06	5.07e-05
100912152	LOC100912152	mRNA
100912159	LOC100912159	mRNA
100912163	LOC100912163	mRNA	524.12	489.31	282.56	356.77	583.26	503.22	492.32	379.21	-0.265093	3.57e-08	4.22e-07
100912165	LOC100912165	mRNA	86.89	158.36	191.85	130.39	113.46	95.27	130.95	118.53	0.288004	0.00143427	0.0066053
100912172	LOC100912172	mRNA	0	0	0	0	0	0	2	0
100912186	LOC100912186	mRNA
100912195	LOC100912195	mRNA	709.25	983.01	995.52	707.16	586.3	847.59	900.59	802.24	0.0935477	0.0088108	0.0310531
100912196	LOC100912196	mRNA
100912199	LOC100912199	mRNA	5.43	3.24	15.24	6.6	9.24	3.08	15.76	3.23	-0.0579229	0.874588	0.941058
100912216	Prcd	mRNA	85.61	113.76	116.8	82.35	69.67	94.11	80.69	96.95	0.202523	0.0565914	0.139518
100912217	LOC100912217	mRNA
100912218	Itprip	mRNA	24	15.3	17.09	16.02	14	21.13	21.01	27.05	-0.220803	0.340373	0.528354
100912228	LOC100912228	mRNA	0	48.09	48.09	48.09	96.18	0	96.18	48.09	-0.757547	4.04e-07	4.02e-06
100912233	LOC100912233	mRNA
100912235	Mast4	mRNA	2574.92	1959.83	2112.44	2149.05	2198.47	2293.74	1996.93	2082.36	0.0167577	0.444025	0.628878
100912245	LOC100912245	mRNA
100912252	LOC100912252	mRNA	0	0	1	0	0	0	0	0
100912259	LOC100912259	mRNA	0	0	0	0	0	10.07	9.95	20.4	-6.35758	3.92e-11	6.83e-10
100912261	LOC100912261	mRNA
100912262	LOC100912262	mRNA	0	0	0	0	0	9.14	0	0	-4.21278	0.00253609	0.0108352
100912265	LOC100912265	mRNA
100912272	LOC100912272	mRNA
100912282	LOC100912282	mRNA
100912286	Leng9	mRNA	107	84	102	120	111	106	100	129	-0.131484	0.181847	0.339597
100912289	Fam9c	mRNA
100912292	Enho	mRNA	1502	1744	1472	1979	1799	1731	1789	1927	-0.134251	3.97e-08	4.67e-07
100912294	LOC100912294	mRNA	35	31.92	35.03	50	40	32.95	51.39	53	-0.243503	0.126229	0.259164
100912302	Sox1	mRNA	9	17	11	9	13	17	16	20	-0.541414	0.0488619	0.124638
100912306	LOC100912306	mRNA
100912314	LOC100912314	mRNA
100912317	LOC100912317	mRNA
100912321	LOC100912321	mRNA
100912327	LOC100912327	mRNA
100912336	LOC100912336	mRNA	8	2	2	4	3	3	2	5	0.278979	0.603564	0.758206
100912338	LOC100912338	mRNA	2	1	0	3	1	0	1.04	2	0.550026	0.54972	0.720686
100912340	LOC100912340	mRNA
100912342	LOC100912342	mRNA	24	47.01	29	20.16	32	24.43	25.39	39	-0.0283641	0.87871	0.943277
100912347	LOC100912347	mRNA	18	18	21	17	20	18	31	25	-0.365717	0.101628	0.219426
100912348	LOC100912348	mRNA
100912350	LOC100912350	mRNA	13.17	17.1	12.59	11.57	11.96	11	5.12	10.61	0.47186	0.117183	0.244565
100912356	LOC100912356	mRNA
100912361	LOC100912361	mRNA
100912365	LOC100912365	mRNA	11	7	4	8	15	9	4	6	-0.201154	0.577405	0.737636
100912371	LOC100912371	mRNA
100912372	Tcaf2	mRNA	2.19	1.36	0	0	0	0	0	0
100912379	LOC100912379	mRNA	18.81	13.48	22	0	27.94	0	7.21	29.74	-0.277891	0.294022	0.480679
100912380	LOC100912380	mRNA	8197.62	8544.8	8191.82	9319.96	9382.38	9925.81	9646.43	9045.96	-0.170322	1.18e-56	2.45e-54
100912388	LOC100912388	mRNA
100912391	LOC100912391	mRNA	1.28	0.15	0	2.47	0	0	1.27	2.77	-0.0714628	0.944365	0.985013
100912393	LOC100912393	mRNA	0	0	0	0	0.13	0	0	0
100912399	LOC100912399	mRNA
100912401	LOC100912401	mRNA
100912405	LOC100912405	mRNA
100912408	LOC100912408	mRNA
100912415	LOC100912415	mRNA
100912416	LOC100912416	mRNA	21.41	8.36	3.96	0	6.52	4.2	2.69	10.02	0.505094	0.189315	0.349516
100912421	LOC100912421	mRNA
100912425	LOC100912425	mRNA
100912426	LOC100912426	mRNA
100912428	LOC100912428	mRNA
100912432	LOC100912432	mRNA
100912441	LOC100912441	mRNA	0	0	0	0	0	0	1.05	0
100912447	Nynrin	mRNA	318	354	391	193	224	307	326	324	0.0682459	0.243063	0.420047
100912450	LOC100912450	mRNA	5.45	4.99	0	0	8.47	0	0	17.6	-1.34085	0.00759965	0.027412
100912456	Lilrb1	mRNA	3.91	0	1.21	0	0	1.84	6.01	1.23	-0.84713	0.278281	0.461785
100912459	LOC100912459	mRNA	260	278	334	156	210	200	177	296	0.198773	0.00263646	0.0112143
100912471	LOC100912471	mRNA	2	13.66	0	18.39	5.91	0	41.27	62.19	-1.70407	6.82e-11	1.14e-09
100912474	LOC100912474	mRNA
100912475	LOC100912475	mRNA	8.39	22.65	0	0	0	0.16	0	0	7.57933	2.93e-08	3.5e-07
100912477	LOC100912477	mRNA
100912478	LOC100912478	mRNA	112.1	54.95	168.36	92.4	138.15	111.46	127.66	139.12	-0.292072	0.00191183	0.00845806
100912479	LOC100912479	mRNA	0	0	3	0	5.77	4.63	1.44	0	-2.00122	0.0166397	0.0526129
100912481	LOC100912481	mRNA	531.64	825.8	522.74	300.16	429.49	730.2	555.22	751.81	-0.198622	2.76e-06	2.36e-05
100912482	LOC100912482	mRNA
100912483	LOC100912483	mRNA	114	136	130	102	92	123	124	127	0.0281216	0.764128	0.871712
100912484	LOC100912484	mRNA	0	0	1.46	0	0	0	0	1.53	-0.0881449	0.957878	0.99272
100912485	LOC100912485	mRNA
100912488	LOC100912488	mRNA
100912489	LOC100912489	mRNA	0	0	0	0	0	3.08	0	2.95	-3.61274	0.0196313	0.060232
100912491	LOC100912491	mRNA
100912498	LOC100912498	mRNA	555.37	627.19	708.98	622.06	502.15	471.09	728.85	509.83	0.163874	9.61e-05	0.000601
100912499	Lilra3	mRNA	4.09	0	0	1.71	10.74	0	0	0	-0.909451	0.210466	0.377976
100912505	LOC100912505	mRNA
100912507	LOC100912507	mRNA
100912509	LOC100912509	mRNA	0	0	0	0	0	1	0	0
100912515	LOC100912515	mRNA
100912521	Nmrk2	mRNA	0	0	3	2	1	2	1	0	0.301346	0.754776	0.864759
100912524	LOC100912524	mRNA
100912525	Hoxa4	mRNA
100912526	Rtl9	mRNA	14	19	21	15	7	16	19	23	0.065575	0.792532	0.890638
100912527	LOC100912527	mRNA
100912529	LOC100912529	mRNA
100912534	LOC100912534	mRNA
100912536	Styx	mRNA	98	88	111	116	120	97	113	131	-0.179207	0.0665382	0.158939
100912537	LOC100912537	mRNA	227	245	269	228	231	213	262	205	0.068464	0.303673	0.489942
100912538	LOC100912538	mRNA	0	0	1.79	0	0	0	1.79	5.38	-2.0226	0.0606048	0.147408
100912540	LOC100912540	mRNA
100912543	LOC100912543	mRNA
100912549	LOC100912549	mRNA
100912555	LOC100912555	mRNA
100912563	Insm1	mRNA	69.02	55.95	60.86	46.61	74.35	73.6	67.29	62.12	-0.275483	0.0314333	0.0881055
100912564	LOC100912564	mRNA
100912566	LOC100912566	mRNA	1664.09	1991.29	1658.76	1866.21	1649.94	2057.8	1909.88	1987.91	-0.103576	1.28e-05	9.65e-05
100912571	LOC100912571	mRNA	0	0	0	0	0	0	215.41	0	-8.77152	1.27e-43	1.65e-41
100912573	Ms4a6e	mRNA
100912578	LOC100912578	mRNA	859.93	872.15	700.07	931.75	837.84	1041.27	990.69	806.7	-0.14878	1.53e-05	0.000114
100912580	LOC100912580	mRNA
100912581	LOC100912581	mRNA
100912582	LOC100912582	mRNA	95.66	107.88	94.27	64.15	65.98	61	64.98	74.35	0.422142	0.000267	0.00149961
100912585	LOC100912585	mRNA
100912586	LOC100912586	mRNA
100912590	LOC100912590	mRNA	0	0	0	0	0	0	17.92	17.92	-6.18408	4.48e-10	6.83e-09
100912596	LOC100912596	mRNA
100912599	LOC100912599	mRNA
100912604	LOC100912604	mRNA	241	0	0	241	241	482	0	0	-0.605544	5.54e-13	1.14e-11
100912605	LOC100912605	mRNA
100912608	LOC100912608	mRNA	563.47	761.22	810.21	570.47	466.89	658.16	747.17	636.89	0.0880686	0.0275706	0.0792924
100912609	LOC100912609	mRNA	5.69	0	8	0	0	0	0	0	4.75447	0.000164	0.000973
100912611	LOC100912611	mRNA	0	0.62	0	3.62	0.44	6.65	0	0	-0.762303	0.381641	0.57019
100912615	LOC100912615	mRNA	7.54	4.83	8.56	11.66	5.13	9.44	11.21	1.82	0.219179	0.556317	0.72333
100912618	LOC100912618	mRNA
100912642	LOC100912642	mRNA	0	0	7.17	0	2.06	4.05	8.21	5.13	-1.46031	0.013908	0.0454748
100912656	LOC100912656	mRNA	21.23	12.18	11.75	5.92	8.56	12.02	17.86	14.02	-0.0590409	0.83507	0.91778
100912658	LOC100912658	mRNA	9	14.4	4.25	3	10.83	13.53	14.58	3.64	-0.49487	0.144878	0.287621
100912683	LOC100912683	mRNA	3.39	0	1.17	3.69	3.18	1.75	1.1	0	0.431655	0.574196	0.735305
100912689	LOC100912689	mRNA	2.78	2.05	1.72	2.17	2.04	1.08	1.01	1.99	0.490215	0.516073	0.69157
100912748	LOC100912748	mRNA	1	2.96	2.03	3.56	2.77	3.86	3.92	0.97	-0.29115	0.643964	0.787807
100912756	LOC100912756	mRNA	2.4	3.06	6.2	1.22	4.31	5.24	5.2	5.36	-0.663362	0.19211	0.353394
100912787	LOC100912787	mRNA	43.74	52.98	40.74	38.94	34.92	49.22	56.02	0.02	0.310988	0.0559502	0.138272
100912831	LOC100912831	mRNA	0	0	0	0	0	0.97	0	0
100912845	LOC100912845	mRNA	4.09	11.63	11.23	3.69	3.2	1.25	3.32	4.04	1.35483	0.00377667	0.0152263
100912849	LOC100912849	mRNA	0	3	1	4	1	0	3	0	0.979418	0.253557	0.432793
100912904	LOC100912904	mRNA	45.13	135.21	105.85	108.17	76.53	136.8	101.42	86.23	-0.0445987	0.662905	0.802459
100912924	Tigd2	mRNA	249	265	226	278	258	283	239	253	-0.0416843	0.512941	0.688683
100912936	Hoxd8	mRNA	559	509	545	546	535	486	594	477	0.0248988	0.573703	0.735033
100912943	LOC100912943	mRNA	13	25	15	5	5	9	7	11	0.837399	0.00706059	0.0258235
100912948	LOC100912948	mRNA	1.23	3.18	1.44	1.58	2.51	1.35	0	1.38	0.483214	0.554112	0.721334
100912958	LOC100912958	mRNA
100912964	LOC100912964	mRNA	26	19	24	15	22	22	30	14	-0.0876958	0.690223	0.821897
100912971	LOC100912971	mRNA	4.67	0	0	4.19	1.43	5.91	2.31	2.7	-0.499714	0.428268	0.615024
100912998	LOC100912998	mRNA
100913013	LOC100913013	mRNA	0	0	0	0	1	1	0	3	-3.34251	0.0393956	0.105693
100913063	Cd79a	mRNA	0	3.61	2	0	2	2	1.61	1.86	-0.433689	0.588621	0.746369
100913081	Pate-f	mRNA
101241893	Trim34	mRNA	135	124	137	108	152	120	157	131	-0.172585	0.0512082	0.128865
102238592	Ak6	mRNA	232.69	241.07	178.82	233.76	202.71	216.77	233.44	179.18	0.0705217	0.311087	0.498043
102546312	LOC102546312	mRNA	0	0	0	0	0	0	1.07	0
102546342	LOC102546342	mRNA
102546376	LOC102546376	mRNA	1	0	0	1	1.63	0	1	0	-0.415644	0.757686	0.866792
102546394	LOC102546394	mRNA	47.89	65	53.93	78.79	36.83	70.37	91.4	60.86	-0.0997245	0.437395	0.623585
102546424	LOC102546424	mRNA	3.98	5.9	16.69	3.87	4.74	3.86	5.85	5.19	0.611592	0.138271	0.277999
102546454	LOC102546454	mRNA	0	0	0	1	0	1	0	0	-0.0205816	0.991951	0.999178
102546456	LOC102546456	mRNA
102546467	LOC102546467	mRNA	0	0	0	2.4	0	0	1	0	1.24245	0.448472	0.632536
102546484	LOC102546484	mRNA
102546495	LOC102546495	mRNA	0	0	1	0	0	0	0	0
102546505	LOC102546505	mRNA
102546514	LOC102546514	mRNA	0	0	0	0	2	1	1	1	-3.34251	0.0393956	0.105693
102546567	LOC102546567	mRNA
102546572	LOC102546572	mRNA	1079.63	922.02	1049	854.73	831.86	779.01	877	759.05	0.245809	6.49e-13	1.33e-11
102546579	LOC102546579	mRNA
102546589	LOC102546589	mRNA	67.54	39.44	33.57	46.88	53.86	43.34	43.62	52.4	-0.0644742	0.662881	0.802484
102546590	LOC102546590	mRNA	0	0	0	0	1	0	2	1
102546596	LOC102546596	mRNA	0	0	0	0	0	0	1	0
102546601	LOC102546601	mRNA	1	4	4	0	1	1	3	2	0.341988	0.636756	0.784015
102546648	LOC102546648	mRNA	151	127	144	114.32	133.77	160.96	168.97	150	-0.215021	0.0115923	0.0391539
102546663	LOC102546663	mRNA	0	0	0	0	0	0	1	0
102546678	LOC102546678	mRNA	295.44	366.81	403.08	239.89	195.68	261.81	332.6	246.3	0.312144	1.81e-07	1.92e-06
102546698	LOC102546698	mRNA	14	6	16	14	18	5	12	10	0.131421	0.657305	0.798053
102546724	Tex51	mRNA
102546754	LOC102546754	mRNA	3.12	2.03	9.3	8.42	5.07	11	4.17	2.34	-0.00217074	0.995953	0.998242
102546758	Klk5	mRNA
102546764	Cmc4	mRNA	136.43	130	146	156.55	172.1	168.58	176.63	136.42	-0.220899	0.00749891	0.0271341
102546793	LOC102546793	mRNA
102546809	Smim35	mRNA	79	64	42	83	103	49	70	49	-0.0366415	0.768127	0.874586
102546830	LOC102546830	mRNA	0	1	0	0	2	3	0	1	-2.60554	0.0456385	0.118126
102546838	LOC102546838	mRNA	0	1	1	0	0	2	0	0	-0.0205816	0.988618	1
102546845	LOC102546845	mRNA	3	2	1	1	0	1	1	0	1.78677	0.0902623	0.20112
102546862	LOC102546862	mRNA
102546864	LOC102546864	mRNA	24	19	22	9	16	15	11	22	0.188872	0.442514	0.627319
102546874	LOC102546874	mRNA
102546889	LOC102546889	mRNA	2.1	3.14	2.09	2.07	2.1	2.09	5.18	2.11	-0.308972	0.625484	0.775558
102546892	Prrt1b	mRNA	13	22	21	19	8	20	22	16	0.163843	0.500572	0.678566
102546903	LOC102546903	mRNA	0	0	0	2.8	0	0	0	1	1.46485	0.35302	0.541471
102546968	LOC102546968	mRNA	63.25	51.71	43.32	84.43	92.6	50.25	70.61	58.51	-0.184796	0.146554	0.289973
102546990	LOC102546990	mRNA	30	22	20	19	33	22	12	27	-0.0673758	0.750798	0.862359
102547011	LOC102547011	mRNA	2.04	1.03	3.08	0	0	2.03	1.01	1.01	0.582083	0.523892	0.699031
102547029	LOC102547029	mRNA	140.42	194.71	10.72	12.62	27.34	290.26	114.65	159.13	-0.742815	5.62e-15	1.39e-13
102547033	LOC102547033	mRNA
102547035	LOC102547035	mRNA
102547039	LOC102547039	mRNA	15.68	10.77	5.93	7.01	9.88	6.03	4.71	9.27	0.377585	0.278332	0.461828
102547047	LOC102547047	mRNA	17	15	18.05	19.13	15.06	15.97	18.8	22.91	-0.0929755	0.701115	0.828085
102547056	Ulbp1	mRNA	1	0	2	1	0	0	0	0
102547059	LOC102547059	mRNA	138.1	107.38	135.37	57.38	128.1	146	162.1	136.1	-0.405665	8.6e-06	6.7e-05
102547060	LOC102547060	mRNA
102547078	LOC102547078	mRNA	22	28	28	17	22	29	12	27	0.0574209	0.786675	0.886612
102547093	LOC102547093	mRNA	0	1	0	0	0	0.78	0	0	0.337872	0.876325	0.942152
102547118	LOC102547118	mRNA	1	0	3	1	5	5	5	2	-1.78612	0.00785695	0.0282179
102547119	LOC102547119	mRNA	0	0	1	0	0	0	0	0
102547146	LOC102547146	mRNA	0	0	3.08	2.05	0	1.06	0	2.1	0.678453	0.504614	0.682505
102547160	LOC102547160	mRNA	58	35	39	60	34	46	53	34	0.180677	0.236013	0.411825
102547206	LOC102547206	mRNA
102547212	LOC102547212	mRNA	0	0	0	0	1.29	1	1	0
102547219	Mosmo	mRNA	167	189	230	148	135	148	158	185	0.209036	0.0076415	0.0275467
102547221	LOC102547221	mRNA
102547257	LOC102547257	mRNA	16.27	14.94	16.85	7.91	14.95	17.28	7.91	20.49	-0.13596	0.611024	0.76378
102547271	LOC102547271	mRNA	8.13	0	11.48	0	15.65	25.92	0	12.37	-1.48035	3.51e-05	0.000241
102547275	LOC102547275	mRNA
102547287	LOC102547287	mRNA	167	176.86	182.62	156	122.39	167.97	148	144.54	0.206957	0.010849	0.0370532
102547294	Iqcn	mRNA	1	2	1	1	1	1	0	2	0.301346	0.754776	0.864759
102547344	LOC102547344	mRNA	2	1	0	0	0	2.01	1	0	-0.0253826	0.982794	1
102547412	LOC102547412	mRNA	0	0	0	1	1	1	1	0	-1.60554	0.300359	0.487321
102547413	LOC102547413	mRNA	157.97	145.29	143.43	117.44	116.86	109.83	132.66	161.1	0.0956865	0.27496	0.457642
102547414	LOC102547414	mRNA	0	0	0	0	0	1.12	1	0
102547431	LOC102547431	mRNA	7.43	6.89	7.99	6	7.53	4	3.1	2.43	0.710112	0.102756	0.221158
102547504	LOC102547504	mRNA	1	0	0	0	0	0	0	2	-1.02058	0.551931	0.721057
102547505	LOC102547505	mRNA	1	2	1	0	1	2	0	1	-0.0205816	0.983903	1
102547542	LOC102547542	mRNA
102547604	LOC102547604	mRNA	1.9	0	0.94	0	1.38	0	0	1.81	-0.188247	0.872823	0.939545
102547612	LOC102547612	mRNA	7.97	5.54	9.69	4.54	11.82	10.16	11.37	10.92	-0.694943	0.0437617	0.114416
102547626	LOC102547626	mRNA	61.7	50.68	60.57	47.15	50.53	42.61	42.1	53.95	0.197742	0.166204	0.318067
102547645	LOC102547645	mRNA	1	1	0	0	0	0	0	0
102547665	LOC102547665	mRNA	14.31	12.5	11.82	3	12.75	9.01	9.36	8.13	0.0643493	0.841069	0.92183
102547688	LOC102547688	mRNA	1.2	1.53	1.17	4.26	4.29	5.07	5.89	4.51	-1.29652	0.0235455	0.0698548
102547753	LOC102547753	mRNA	23	13	17	14	10	14	15	12	0.373082	0.162089	0.311821
102547755	Dbf4b	mRNA	0	1	3	1	2	1	3	0	-0.283616	0.74493	0.858336
102547798	LOC102547798	mRNA	10.56	16.57	5.82	3.09	6.23	13.19	8.12	13.83	-0.219568	0.503667	0.681576
102547811	LOC102547811	mRNA	85.21	57.2	34.79	63.02	65.6	33.76	67.12	19.44	0.349093	0.012869	0.0426328
102547820	LOC102547820	mRNA
102547850	LOC102547850	mRNA	0	0	1.16	0	0	0	0	0
102547897	LOC102547897	mRNA	87	82	89	70	64	68	84	80	0.127517	0.269916	0.452163
102547920	LOC102547920	mRNA	55.11	38.22	31.03	33.4	30.91	49.8	41.7	33.6	-0.00448867	0.978016	1
102547932	Zfp623	mRNA	247.78	213.29	224.21	254.02	251.89	251.88	247.13	225.47	-0.0764236	0.246383	0.423864
102547956	LOC102547956	mRNA	10.56	9.18	6.88	2.82	1.28	6.58	8.95	8.93	0.173184	0.65606	0.796912
102547963	LOC102547963	mRNA
102548013	Ccdc168	mRNA	0	4	0	0	1	1	0	1	0.394456	0.718967	0.841036
102548017	LOC102548017	mRNA
102548031	LOC102548031	mRNA	0	0	0	0	0	1	0	0
102548061	LOC102548061	mRNA
102548067	LOC102548067	mRNA	1	0	1	0	0	0	0	0
102548071	LOC102548071	mRNA
102548076	LOC102548076	mRNA	10.71	5.67	38.5	17.15	0	49.46	0	21.33	0.00447071	0.985227	1
102548101	LOC102548101	mRNA	149.06	103.56	96.13	120.95	98.15	108.84	92.13	68.15	0.334317	0.000839	0.00412159
102548111	LOC102548111	mRNA	0	2	0	0	1	0	0	0	0.979418	0.568084	0.732083
102548126	Armh2	mRNA
102548128	LOC102548128	mRNA
102548129	LOC102548129	mRNA
102548133	LOC102548133	mRNA
102548151	LOC102548151	mRNA	0	0	0	0	1	0	0	0
102548161	LOC102548161	mRNA	4	8	3	3	2	3	6	2	0.448904	0.389489	0.577628
102548162	LOC102548162	mRNA	34	18	35	17	26	16	22	17	0.340008	0.110364	0.233499
102548194	LOC102548194	mRNA	0	0	1	0	0	0	0	0
102548228	Bivm	mRNA	356	358	347	303	330	323	351	311	0.0321992	0.563558	0.728917
102548230	Znf235	mRNA	81.98	87.99	103.3	72.04	62.32	76.48	78.64	109.85	0.056741	0.61011	0.763575
102548231	LOC102548231	mRNA	140	163	160	171	143	146	176	148	0.0280142	0.731724	0.848913
102548286	LOC102548286	mRNA
102548320	LOC102548320	mRNA	195.91	160.84	224.38	218.36	193.48	196.85	191	229.3	-0.0405452	0.572853	0.734253
102548396	LOC102548396	mRNA	0	0	0	0	1.23	0	0	0
102548397	LOC102548397	mRNA	0	11.86	3.74	0	0	13.62	8.51	2.89	-0.702117	0.126115	0.258958
102548459	LOC102548459	mRNA	51.19	59.64	51.15	59.16	54.76	52.79	53.22	42.41	0.10162	0.468355	0.650858
102548478	LOC102548478	mRNA	22.98	13.53	14.96	27.21	23.04	14.78	21.81	24	-0.108605	0.631634	0.779963
102548503	LOC102548503	mRNA	139.35	143.15	136.28	107.03	119.85	115.66	125.95	142.18	0.0415671	0.643957	0.787852
102548506	LOC102548506	mRNA	3	5	3	6	5	4	4	9	-0.39255	0.397489	0.585557
102548514	LOC102548514	mRNA	180.91	156.72	162.31	180.25	158.68	161.04	163.36	171.63	0.0345002	0.662237	0.801969
102548541	LOC102548541	mRNA	79.87	51.93	55.96	47.72	48.84	58.41	59.47	59.05	0.0401691	0.76497	0.872401
102548546	LOC102548546	mRNA	2.92	1.02	2.34	2.78	2.08	0.1	0	0	2.0346	0.0355284	0.0973205
102548559	Vcpkmt	mRNA	201	234	229	175	175	249	237	207	-0.0696058	0.318943	0.50458
102548568	LOC102548568	mRNA	6	2	2	6	2	3	6	10	-0.412899	0.386242	0.575024
102548594	LOC102548594	mRNA	0	0	1.02	1.05	1	1.03	0	0	0.00756943	0.995762	0.998104
102548600	LOC102548600	mRNA	122.02	129.58	129.37	121.92	106.06	124.97	107.89	127.81	0.087073	0.347542	0.535985
102548633	LOC102548633	mRNA	16.51	18.38	0	3.11	6.16	12.27	14.14	17.71	-0.424567	0.168882	0.321346
102548682	LOC102548682	mRNA	13.01	4.02	2.93	4.43	7.01	8.06	6.99	10.85	-0.452818	0.237468	0.413577
102548693	Zfp28	mRNA	98	118	134	77	99	114	117	116	-0.0833893	0.393203	0.581253
102548694	LOC102548694	mRNA	40	45	33	33	45	36	28	34	0.0579518	0.730606	0.848099
102548695	LOC102548695	mRNA	291.06	332	333	239	233	313.1	292	312	0.0347421	0.559858	0.725977
102548702	LOC102548702	mRNA
102548714	LOC102548714	mRNA	1.14	1.08	0	0	0	2	1.18	2.42	-1.35545	0.212221	0.380308
102548728	LOC102548728	mRNA	15.76	27.47	32.43	13.46	15	18.8	38.56	23	-0.118217	0.577987	0.738148
102548730	LOC102548730	mRNA	183.06	249.82	302.38	113.59	138.13	156.06	136.92	157.3	0.508106	3.58e-11	6.24e-10
102548734	LOC102548734	mRNA	1	0	0	0	3	3	1	3	-3.34251	0.00357604	0.0145165
102548778	Parp10	mRNA	90.32	57.55	60.25	61.77	89.96	60.39	76.25	81.72	-0.212639	0.0767049	0.177361
102548794	LOC102548794	mRNA	0	1	0	0	0	0	0	0
102548800	LOC102548800	mRNA	13	6.98	9.98	8.97	8	17	14	8	-0.29236	0.348659	0.537165
102548875	LOC102548875	mRNA
102548912	LOC102548912	mRNA
102548917	LOC102548917	mRNA	121	117	81	94	95	90	99	98	0.0919875	0.368884	0.557541
102548978	LOC102548978	mRNA
102549007	LOC102549007	mRNA	0	2	1	0	0	1	1	2	-0.435619	0.691079	0.821981
102549010	Bend2	mRNA
102549011	LOC102549011	mRNA
102549059	LOC102549059	mRNA	8	9	10	14	4	10	9	6	0.478989	0.168019	0.320169
102549061	LOC102549061	mRNA	0	2	1	1.1	1.93	1.84	0	0	0.100478	0.922211	0.970972
102549173	LOC102549173	mRNA	12.17	11.09	11.53	21.24	23.7	16.09	15.82	17.99	-0.414088	0.10386	0.223035
102549174	LOC102549174	mRNA	1	1	0	1	0	1	0	0	1.56438	0.312922	0.499257
102549189	LOC102549189	mRNA
102549220	LOC102549220	mRNA
102549226	LOC102549226	mRNA	4	6	2	6	1	5	7	2	0.242453	0.630013	0.778749
102549227	LOC102549227	mRNA	5.55	2.26	2.28	3.33	5.86	3.45	1.1	2.3	0.057839	0.9184	0.968238
102549229	LOC102549229	mRNA
102549235	LOC102549235	mRNA	0	1	0	0	1	0	0	0	-0.0205816	0.991951	0.999178
102549291	LOC102549291	mRNA
102549344	LOC102549344	mRNA	7.17	11.1	13.65	7.31	4.98	13.2	14.81	15.76	-0.334026	0.278956	0.46257
102549389	LOC102549389	mRNA
102549391	LOC102549391	mRNA	1.34	0	1	1.85	0	0	0	0
102549397	LOC102549397	mRNA	23.15	14.91	16.3	29.66	11.86	19.53	16.16	7.85	0.580265	0.0188149	0.0581951
102549404	LOC102549404	mRNA	429	594	603	451	589	390	517	545	0.00464342	0.917748	0.967774
102549465	LOC102549465	mRNA	0	0	0	0	0	0	0	5	-3.34251	0.0393956	0.105693
102549471	LOC102549471	mRNA	126	100	125	119	99	109	118	113	0.0778582	0.416034	0.603511
102549491	Fam186a	mRNA	11	17	11	12	12	13	6	12	0.225579	0.449281	0.633287
102549500	LOC102549500	mRNA	2.02	2	0	1.02	1.91	1.14	3.08	2.09	-0.726296	0.366451	0.555284
102549506	LOC102549506	mRNA	51	53	48	20	26	35	33	34	0.405683	0.0154321	0.0494171
102549509	LOC102549509	mRNA	0	4.26	0	0	0	2.63	11.71	2.96	-2.04243	0.00335597	0.013745
102549542	LOC102549542	mRNA	1662.96	1564.42	1735.24	1456.79	1754.8	1528.23	1374.16	1443.8	0.0528157	0.0405629	0.107916
102549548	LOC102549548	mRNA	0	1	1	0	2	2	0	0	-1.02058	0.400196	0.587302
102549582	LOC102549582	mRNA	1	3	0	0	2	1.98	1	2	-0.823809	0.353326	0.541623
102549607	LOC102549607	mRNA
102549615	LOC102549615	mRNA	526.27	447.82	399.76	447.7	417.31	522.99	548.79	440.27	-0.103537	0.0280014	0.0802793
102549681	Plekhg7	mRNA
102549694	LOC102549694	mRNA	64.93	100.89	65.11	47.57	56.21	45.24	82.01	86.78	0.0228545	0.852807	0.92864
102549710	Samd11	mRNA	164	96	109	44	130	119	138	74	-0.179207	0.0665382	0.158939
102549712	LOC102549712	mRNA	184.71	144.59	235.79	208.01	192.98	162.73	197.54	173.02	0.0695674	0.350624	0.538834
102549716	LOC102549716	mRNA	0	0	1	0	0	2	0	0	-1.02058	0.551931	0.721057
102549724	LOC102549724	mRNA
102549738	LOC102549738	mRNA	0	0	1.19	0	0	1.22	0	3.83	-2.1059	0.106076	0.226625
102549747	LOC102549747	mRNA	27.55	21.39	11.8	15.07	22.22	11.61	9.96	22.99	0.16239	0.501977	0.679942
102549785	LOC102549785	mRNA
102549803	Nat8f4	mRNA	117.38	111.98	119.46	140.03	63.51	143.51	102.18	62.23	0.37572	0.000144	0.000864
102549812	LOC102549812	mRNA	20.2	19.92	17.15	21.36	18.94	30.34	21.99	22.32	-0.271856	0.217156	0.387106
102549817	LOC102549817	mRNA	31.08	32.52	24.64	34.68	28.74	32.49	23.32	36.95	-0.00381826	0.983494	1
102549828	LOC102549828	mRNA	0	0	2	0	0	0	0	0
102549836	LOC102549836	mRNA	251	154	206	215	173	188	219	191	0.0788293	0.275063	0.457605
102549842	LOC102549842	mRNA	201	179	209	213	176.31	185.03	187.98	171	0.134383	0.0693891	0.164196
102549940	LOC102549940	mRNA
102549995	LOC102549995	mRNA
102550026	LOC102550026	mRNA	2.95	0	2.95	2.12	5.62	0	0	0	0.49245	0.53171	0.705864
102550080	LOC102550080	mRNA
102550127	LOC102550127	mRNA	31.08	38.97	18.04	25.98	29.26	20.36	32.92	42.98	-0.158579	0.395199	0.583311
102550148	LOC102550148	mRNA
102550160	LOC102550160	mRNA
102550189	Samd1	mRNA	529	503	491	461	594	506	659	506	-0.211681	1.78e-06	1.57e-05
102550196	Gcnt7	mRNA	2	0	0	0	2	0	1	0	-0.605544	0.642279	0.787139
102550203	LOC102550203	mRNA	0	2.28	1.2	3.28	1.16	3.39	3.6	3.97	-0.862876	0.203228	0.368773
102550211	LOC102550211	mRNA	3	1	0	0	2	0	0	2	-0.0205816	0.983903	1
102550225	LOC102550225	mRNA	1.07	0	0	0	0	0	0	0
102550241	LOC102550241	mRNA	5.52	7.15	7.61	1.67	3.7	5.02	0	0	1.31124	0.0168262	0.0531201
102550256	LOC102550256	mRNA
102550257	LOC102550257	mRNA
102550277	LOC102550277	mRNA	43.84	70.86	72.46	74.38	25.19	0	100.88	107.58	0.142101	0.273488	0.455938
102550291	LOC102550291	mRNA	32.12	33.82	22.52	29.39	37.51	28.5	19.61	32.04	-0.0182538	0.922658	0.971219
102550306	LOC102550306	mRNA	5	7	3	4	17	7	4	6	-0.860117	0.0335569	0.0930472
102550309	LOC102550309	mRNA	2.09	0	0.76	1.67	0	2.48	0	0	0.845401	0.448339	0.63247
102550330	LOC102550330	mRNA	5	11	7.13	3	8	6	6	10	-0.219837	0.568582	0.73108
102550344	Kmt2b	mRNA	1175	1224	1295	747	916	986	937	1118	0.145896	3.66e-06	3.06e-05
102550375	LOC102550375	mRNA	1.01	1.01	0	1	1.02	1	0	0	0.559612	0.666421	0.803478
102550385	Lyrm4	mRNA	259	339	286	324	275	316	330	279	-0.0109956	0.851658	0.928326
102550396	LOC102550396	mRNA	117.45	95.86	118.27	94.69	90.3	85.15	114.54	110.82	0.0682674	0.496328	0.674936
102550397	LOC102550397	mRNA	96.62	92.94	118.94	83.35	91.3	145.64	89.52	125.15	-0.225358	0.0234832	0.0697152
102550403	LOC102550403	mRNA	1	1	1	3	3	0	3	2	-0.435619	0.574119	0.735334
102550416	Sprr2f	mRNA
102550424	LOC102550424	mRNA	8	4	7	5	6	5	5	5	0.172063	0.68946	0.821229
102550438	LOC102550438	mRNA	0	1	0	0	2	1	0	0	-1.60554	0.300359	0.487321
102550455	LOC102550455	mRNA	37.33	37.09	37.63	32.46	25.41	30.17	35.83	33.96	0.184396	0.294385	0.481185
102550456	LOC102550456	mRNA	0	0	70.12	0	0	0	0	0	7.11117	2.23e-17	6.68e-16
102550466	LOC102550466	mRNA
102550512	LOC102550512	mRNA	0	1	0	2	1	0	0	0	1.56438	0.312922	0.499257
102550523	Fsbp	mRNA	5	3	9	5	7	3	3	10	-0.084712	0.843887	0.923096
102550530	LOC102550530	mRNA	9.53	26.64	5.52	26.63	12.89	27.61	24.7	13.11	-0.21747	0.361976	0.550781
102550577	LOC102550577	mRNA	1.35	12.33	9.26	2.69	5.19	2.79	1.22	0	1.45755	0.005119	0.0196686
102550582	LOC102550582	mRNA	0	1.95	0	0	0	0	0	0
102550584	LOC102550584	mRNA	1.6	0	0	0	0	0	1.01	0	0.643135	0.722283	0.842763
102550585	LOC102550585	mRNA	0	1.75	1.68	0	2.12	0	1.52	2.86	-0.942813	0.315312	0.500738
102550588	LOC102550588	mRNA	9.36	30.21	2.4	31.6	23.26	18.05	42.39	35.05	-0.71132	0.00075	0.00373924
102550598	LOC102550598	mRNA
102550609	LOC102550609	mRNA	0.76	10.58	3	1.31	4.2	7.56	7	16.67	-1.19939	0.00433568	0.017089
102550614	LOC102550614	mRNA	0	0	0	0	0	0	1	2
102550650	LOC102550650	mRNA
102550654	LOC102550654	mRNA
102550657	LOC102550657	mRNA	78.18	55.98	70.16	76.98	54.6	67.6	36.09	78.87	0.225667	0.0754668	0.175251
102550664	LOC102550664	mRNA	28.17	10.35	26.53	15.5	24.46	19.94	11.39	18.43	0.097495	0.674347	0.809199
102550682	LOC102550682	mRNA
102550699	Sprr2d	mRNA
102550708	LOC102550708	mRNA
102550714	LOC102550714	mRNA	4	5	7	3	2	0	7	6	0.320455	0.518701	0.694102
102550729	LOC102550729	mRNA	2	6	6	2	2.28	7	4	1.17	0.126421	0.809075	0.901597
102550773	LOC102550773	mRNA	3.07	7.75	10.69	3.33	3.36	7.94	10.16	4.68	-0.0941756	0.815756	0.906011
102550789	Rnf212b	mRNA	9.51	13.05	7.63	5.52	13.94	6	6.94	5.9	0.102931	0.767922	0.874461
102550797	LOC102550797	mRNA	3.17	0	5.05	2.9	0.09	3.95	3.21	2.93	0.106838	0.864376	0.935178
102550809	Scml1	mRNA	0	0	1	1	0	2	0	0	-0.0205816	0.988618	1
102550816	Krtap20-1	mRNA
102550845	LOC102550845	mRNA	2.99	0	2.87	2.71	0	1.39	0	2.86	0.991251	0.232653	0.407671
102550851	LOC102550851	mRNA	164.16	182.79	176.88	100.44	145.45	152.35	203.58	169.33	-0.124101	0.121796	0.25221
102550872	LOC102550872	mRNA	0	0	0	0	1	0	0	0
102550885	LOC102550885	mRNA
102550890	LOC102550890	mRNA
102550892	LOC102550892	mRNA	0	0	7.78	0	7.55	0	7.78	0	-0.999097	0.105602	0.225981
102550901	Krtap20l3	mRNA
102550903	Ufsp1	mRNA	333	424	348	403	365	459	408	420	-0.152159	0.00304726	0.0126618
102550922	LOC102550922	mRNA	0	0	0	0	0	0	0	1
102550932	Tigd4	mRNA	5	0	1	3	1	2	0	1	1.14934	0.167623	0.319782
102550973	LOC102550973	mRNA
102550986	LOC102550986	mRNA	21	16	21	33	27	23	12	33	-0.0826426	0.696107	0.824722
102550988	LOC102550988	mRNA	0	0	0	0	0	0	0	1
102551000	LOC102551000	mRNA	0.95	0.34	2.37	2.96	1.09	0.97	4.56	0	-0.0205816	0.979293	1
102551003	LOC102551003	mRNA
102551014	LOC102551014	mRNA	10.18	11.38	6.52	14.09	10.78	15.16	4.16	6.23	0.194474	0.550947	0.721882
102551034	Crocc2	mRNA	89	87	61	13	67	74	138	72	-0.510125	1.68e-05	0.000124
102551050	LOC102551050	mRNA	3.96	2.81	0	0	3.79	1.75	7.56	7.81	-1.64755	0.00534597	0.0204293
102551064	LOC102551064	mRNA	1	3	2	3	0	2	2	3	0.341988	0.636756	0.784015
102551069	Krtap22-2	mRNA
102551071	LOC102551071	mRNA	0.08	0.01	0.04	3.14	8.56	0.02	1.55	1.4	-1.83861	0.025545	0.0745912
102551085	Xrcc3	mRNA	14	13	27	15	15.02	15	12	7	0.472644	0.077283	0.17845
102551086	LOC102551086	mRNA	0	0	0	0	2	0	0	0
102551095	LOC102551095	mRNA	119	159	157	144	135	123	179	133	0.00201981	0.981069	1
102551102	LOC102551102	mRNA
102551105	LOC102551105	mRNA
102551117	LOC102551117	mRNA
102551140	LOC102551140	mRNA	156.84	172.95	200.98	173.13	172.31	206.25	214.93	126.85	-0.0538891	0.480919	0.663037
102551143	LOC102551143	mRNA	0	0	0	0	1	0	0	0
102551166	LOC102551166	mRNA
102551168	LOC102551168	mRNA
102551177	LOC102551177	mRNA	195.94	247.28	331.35	90.23	143.71	161.72	120.04	176.14	0.502956	3.57e-11	6.24e-10
102551184	LOC102551184	mRNA	11.31	14.9	12.49	16.2	27.18	11.59	12.29	15.61	-0.300813	0.251463	0.430301
102551192	LOC102551192	mRNA
102551194	LOC102551194	mRNA	16.42	6.55	15.76	14.65	13.11	7.49	20.47	6.98	0.131181	0.647263	0.790313
102551201	LOC102551201	mRNA
102551208	Tctex1d4	mRNA	1	3	1	1	2	2	1	1	-0.0205816	0.980286	1
102551241	LOC102551241	mRNA
102551257	LOC102551257	mRNA	77.05	77.3	79.5	93.22	76.73	82.49	71.6	84.11	0.0339866	0.765377	0.872539
102551265	LOC102551265	mRNA
102551278	LOC102551278	mRNA
102551296	LOC102551296	mRNA	0.24	0	1.1	1.11	1.12	1.09	0	0	0.128154	0.923667	0.971667
102551304	LOC102551304	mRNA
102551309	LOC102551309	mRNA	2	1	1	3	0	0	0	0	3.78677	0.0111282	0.037834
102551311	LOC102551311	mRNA	4.02	4.06	0	5.19	0	2.02	2.02	0	1.69516	0.0245619	0.0722501
102551340	LOC102551340	mRNA	260.23	232.89	237.91	267.1	248.74	249.92	253.49	249.47	-0.0256173	0.691345	0.82163
102551354	LOC102551354	mRNA	7	10.26	9.9	7	12.03	8.52	13.05	11	-0.405317	0.21455	0.383694
102551365	LOC102551365	mRNA	132	98	74	88	73	91	64	70	0.37496	0.00068	0.00342184
102551394	LOC102551394	mRNA
102551397	LOC102551397	mRNA
102551403	Ankfn1	mRNA	83	150	203	65	74	74	94	116.24	0.463303	2.95e-06	2.52e-05
102551406	LOC102551406	mRNA
102551408	LOC102551408	mRNA	77.07	71.52	59.64	74.95	66.59	53.93	64.76	60.48	0.183888	0.14322	0.285164
102551428	LOC102551428	mRNA	0	1	1	0	4	0	1	1	-1.60554	0.143017	0.285053
102551431	LOC102551431	mRNA
102551433	LOC102551433	mRNA	12	21	22	9	7	5	9	17	0.731491	0.0118101	0.0397356
102551435	Eef1akmt4	mRNA	18	21	18	21	28	27	31	18	-0.435619	0.0427334	0.112272
102551447	LOC102551447	mRNA	3.7	1.3	2.77	0	2.49	2.57	5.26	2.6	-0.754201	0.241959	0.418772
102551453	LOC102551453	mRNA	8.45	0	1	0	5.03	6.23	4	21.45	-1.97837	2.85e-05	0.0002
102551468	LOC102551468	mRNA
102551484	LOC102551484	mRNA	0	0	1.39	2.9	1.3	2.47	1.16	4.61	-1.17359	0.145695	0.288711
102551486	LOC102551486	mRNA	4.06	8.06	7.05	6.59	8.08	3	6.03	5.82	0.147315	0.721872	0.842498
102551497	LOC102551497	mRNA
102551504	LOC102551504	mRNA
102551518	LOC102551518	mRNA	61	83	61	47	47	54	26	50	0.489093	0.000494	0.00258993
102551539	LOC102551539	mRNA
102551559	Tex50	mRNA
102551565	LOC102551565	mRNA	0	0	1.8	3.55	13.27	0	1.9	0	-1.52419	0.0249431	0.0730313
102551575	LOC102551575	mRNA
102551620	LOC102551620	mRNA
102551626	LOC102551626	mRNA	0	0	0	5.28	0	0	3.48	0	0.580869	0.555559	0.722601
102551632	LOC102551632	mRNA
102551633	LOC102551633	mRNA	2.03	3.15	0	1.12	2.31	0.93	1.11	2.28	-0.0942387	0.906524	0.961139
102551641	LOC102551641	mRNA
102551647	LOC102551647	mRNA	2	2	5	5	3	9	2	6	-0.535155	0.283287	0.467826
102551660	Eml3	mRNA	725	581	677	522	612	536	571	611	0.083899	0.043253	0.113361
102551679	LOC102551679	mRNA
102551683	LOC102551683	mRNA	16.91	11.3	15.15	14.76	7.78	26.31	14.53	12.45	-0.0920108	0.727772	0.845559
102551692	LOC102551692	mRNA	5.13	1.35	0	2.66	1	3.96	1.89	0	0.395509	0.585551	0.744331
102551694	Klln	mRNA	4	9	8	5	5	5	6	11	-0.0750294	0.849864	0.927281
102551714	LOC102551714	mRNA	49.28	44.96	31.15	59.8	38.43	32.97	48.42	42.86	0.166388	0.282633	0.467103
102551716	Nkain2	mRNA	1703	1495.15	1710	1964.59	2094.13	1596	1662.36	1547	-0.026186	0.286827	0.47216
102551737	LOC102551737	mRNA	10	8	9	15	7	7	2	11	0.616848	0.0793488	0.181879
102551754	LOC102551754	mRNA	0	1.49	0	0	0	0	0	0
102551771	LOC102551771	mRNA
102551788	LOC102551788	mRNA	4.12	2.36	4.31	3.91	6.7	0	9.98	5.16	-0.591738	0.219564	0.390336
102551806	LOC102551806	mRNA	3	3	1	5	4	1	7	1	-0.136059	0.81368	0.90494
102551819	LOC102551819	mRNA	228	138	165	215	216	184	127	168	0.081581	0.283284	0.467883
102551823	LOC102551823	mRNA
102551828	LOC102551828	mRNA	2	1	1	2	0	1	0	0	2.56438	0.0491665	0.125101
102551838	LOC102551838	mRNA	27	20.77	48.52	44.53	54.35	38.39	25.53	15.24	0.0563228	0.746502	0.858878
102551846	Zfp174	mRNA	132.78	106.78	114.98	85.94	114.02	94.07	86.37	114	0.0883001	0.372742	0.561243
102551847	LOC102551847	mRNA	0	0	0	0	0	0	0	1
102551852	LOC102551852	mRNA
102551882	LOC102551882	mRNA	7.68	6.2	4.52	2.59	8.64	4.71	3.01	8.66	-0.273961	0.52035	0.695369
102551887	Fam177b	mRNA
102551890	LOC102551890	mRNA
102551899	LOC102551899	mRNA	50.57	33.17	69	40	49	38.35	40	21	0.357069	0.022858	0.0681905
102551901	LOC102551901	mRNA	11.34	25.01	16.27	12.2	12.3	8.95	5.02	15.51	0.613045	0.0301896	0.0852851
102551929	LOC102551929	mRNA	9	8	14	6	5	9	7	9	0.281981	0.425015	0.612153
102551936	LOC102551936	mRNA
102551947	LOC102551947	mRNA
102551957	LOC102551957	mRNA	11	19.9	17.27	3.18	2.16	10.22	27.04	15.56	-0.119124	0.670399	0.806256
102551980	LOC102551980	mRNA	81.52	71.33	76.44	80.8	90.8	103.12	83.62	65.7	-0.167112	0.139023	0.279143
102552000	LOC102552000	mRNA	398.24	372	378.46	352.09	362.44	365.52	320.95	348.4	0.0824884	0.12391	0.255289
102552016	LOC102552016	mRNA	3	0	1	1	3	4	4	5	-1.69865	0.0127756	0.0424269
102552046	LOC102552046	mRNA
102552047	LOC102552047	mRNA	5	5	13	8	16	3	7	10	-0.23631	0.503212	0.681161
102552055	Angptl7	mRNA	3.14	8.93	8.11	8.11	3.96	10.08	2.01	3.92	0.481876	0.249537	0.427765
102552068	LOC102552068	mRNA	26	22	14	18	14	22	20	30	-0.124918	0.577103	0.73743
102552069	LOC102552069	mRNA	22	33	22	34	44	33	33	31	-0.365717	0.0449715	0.116755
102552073	LOC102552073	mRNA	10	3.11	13.76	9.46	13.18	7	14.63	9.08	-0.293313	0.363637	0.552528
102552101	LOC102552101	mRNA	14.32	14	13	12.08	11.46	7	11.25	13	0.301684	0.306853	0.493334
102552104	LOC102552104	mRNA	0	0	0	0	0	0	0	3.75
102552128	LOC102552128	mRNA	2	0	1	2	4	4	0	4	-1.28362	0.079944	0.18314
102552137	LOC102552137	mRNA
102552143	LOC102552143	mRNA
102552166	LOC102552166	mRNA	27.75	42.06	50.97	46.76	15.25	36.73	11.86	47.18	0.573104	0.00103651	0.00496181
102552169	LOC102552169	mRNA	8.96	2.26	8.07	16.14	15.21	17.01	19.13	10.58	-0.826249	0.00557658	0.0211211
102552170	LOC102552170	mRNA	12	7	5	3	7	6	5	8	0.0338662	0.931911	0.976414
102552182	LOC102552182	mRNA	45	49	41	53	50	38	48	49	0.00262578	0.985978	1
102552195	LOC102552195	mRNA	0	0	0	1	0	0	0	0
102552199	Tgm7	mRNA	104	101.01	114.72	137	115.44	121.38	121.66	141.78	-0.151918	0.103535	0.222547
102552204	LOC102552204	mRNA	11.18	54.68	125.03	22.75	89.02	43.61	24.06	97.36	-0.270512	0.0429972	0.112917
102552223	LOC102552223	mRNA	1	0	0	0	0	0	0	0
102552244	LOC102552244	mRNA
102552286	LOC102552286	mRNA	0	0	0	0	2	0	0	0
102552311	LOC102552311	mRNA	6	8	11	3	6	7	5	7	0.142917	0.718616	0.841459
102552318	LOC102552318	mRNA	0	0	0	0	0	1	0	0
102552324	LOC102552324	mRNA	0	0	0	1	1	1	1	0	-1.60554	0.300359	0.487321
102552326	LOC102552326	mRNA	0	1	0	0	0	0	0	1	-0.0205816	0.991951	0.999178
102552331	LOC102552331	mRNA	3	8	7	1	2	4	1	3	0.905418	0.0994335	0.215909
102552337	LOC102552337	mRNA
102552348	LOC102552348	mRNA	1	0	1	1	0	1	1	0	0.564381	0.66506	0.803316
102552360	LOC102552360	mRNA	7	11	9	6	6	6	10	7	0.165832	0.651214	0.793076
102552367	LOC102552367	mRNA	18.97	4.58	15.14	15.11	22.13	21.11	19.04	10.42	-0.454931	0.07784	0.179465
102552378	LOC102552378	mRNA	0	1	1	0	0	2	0	0	-0.0205816	0.988618	1
102552384	LOC102552384	mRNA
102552387	LOC102552387	mRNA	1.87	1.98	8.48	1.42	1.34	4.29	4.29	4.97	-0.135494	0.801653	0.896817
102552404	LOC102552404	mRNA	1	2	4	3	4	1	0	1	0.716384	0.328452	0.51447
102552463	Zfp446	mRNA	274.79	331.59	303	267	289.39	287.07	268.45	303.83	0.0137202	0.818648	0.907408
102552474	LOC102552474	mRNA	1	0	0	0	0	0	0	0
102552482	LOC102552482	mRNA	99.68	106.35	114.17	94.31	109.41	104.16	106.12	128.58	-0.133543	0.17416	0.328624
102552485	LOC102552485	mRNA
102552497	Pcdhgb6	mRNA	48.19	46.35	88.22	48.03	57.62	59.74	40.79	59.26	0.0655808	0.630459	0.778828
102552503	LOC102552503	mRNA	4.83	1.57	4.51	6.89	3.3	4.94	5.86	6	-0.1959	0.676244	0.810626
102552527	LOC102552527	mRNA	136.12	129.31	94.92	81.67	105.47	116.7	134.23	131.52	-0.163115	0.0849081	0.19185
102552540	LOC102552540	mRNA	301.55	241.26	113.24	371.61	317.58	161.72	241.72	168.78	0.187228	0.00454307	0.0177612
102552542	LOC102552542	mRNA
102552549	LOC102552549	mRNA
102552551	Smim6	mRNA	4	2	3	1.22	0.98	2	2	6	-0.124064	0.843112	0.922799
102552569	LOC102552569	mRNA
102552619	LOC102552619	mRNA
102552627	LOC102552627	mRNA	1	2	2	1	0	1	0	0	2.56438	0.0491665	0.125101
102552638	LOC102552638	mRNA	1	1	0	1	3	1	2	0	-1.02058	0.302849	0.489237
102552640	LOC102552640	mRNA	317	342	295	247	288	365.66	272.27	163.07	0.120651	0.0455192	0.117917
102552651	LOC102552651	mRNA
102552659	LOC102552659	mRNA	0	12.32	3.76	4.32	11.32	2.69	15.94	0	-0.574568	0.161478	0.311037
102552663	LOC102552663	mRNA	1	1	3	3	1	1	2	4	-0.0205816	0.977237	1
102552667	LOC102552667	mRNA
102552669	Tex46	mRNA
102552675	LOC102552675	mRNA	4	4	8	1	2	2	4	6	0.259526	0.617341	0.769288
102552698	LOC102552698	mRNA	1	0	0	0	0	1	2	0	-1.60554	0.300359	0.487321
102552705	Pcdhgb4	mRNA	38.29	35.38	40.11	29.44	43.64	37.76	51.95	27.19	-0.185281	0.263453	0.44414
102552708	LOC102552708	mRNA	1.13	0	0	0.02	0	2.87	0	0.82	-1.70257	0.23103	0.405798
102552729	LOC102552729	mRNA	7.22	11.07	4.1	12	9.01	6.1	1.02	15.97	0.0788342	0.823751	0.910805
102552731	LOC102552731	mRNA	3	1	2	1	1	0	2	1	0.786773	0.375044	0.563435
102552748	LOC102552748	mRNA
102552783	Ac1576	mRNA	51	28.15	55.39	34.55	28	40.19	27.13	28	0.434803	0.0104394	0.035828
102552784	LOC102552784	mRNA
102552799	LOC102552799	mRNA
102552805	LOC102552805	mRNA	50.58	70.22	109.44	34.79	46.52	51.84	61.67	53.83	0.288907	0.0288962	0.0823038
102552823	LOC102552823	mRNA	34.2	27.99	22.15	40.15	24.18	29.63	21.05	20.15	0.369297	0.059075	0.144474
102552838	Mc1r	mRNA	0	4	3	2	4	4	6	5	-1.09858	0.0515173	0.129536
102552844	LOC102552844	mRNA
102552860	LOC102552860	mRNA	0	2.84	2.26	1.99	5.41	0	4.27	0	-0.469803	0.507478	0.685165
102552880	LOC102552880	mRNA	234	264	240	241	208	221	295	208.88	0.0490357	0.457487	0.641595
102552882	LOC102552882	mRNA	2	0	0	0	0	0	0	0
102552889	LOC102552889	mRNA	4.53	8.7	11.7	6.99	5.53	5.48	6.99	8.77	0.233262	0.536482	0.709936
102552895	Podn	mRNA	59.05	70.52	76.22	80.26	57.35	67.3	133.3	67.22	-0.205508	0.0785645	0.180749
102552901	LOC102552901	mRNA
102552911	LOC102552911	mRNA	0	1	4	1	1.05	0	0	0.12	2.33787	0.062156	0.150323
102552920	Armcx5	mRNA	234.85	267.58	305.61	244.85	203.58	264	236	252.35	0.118796	0.065144	0.156107
102552923	LOC102552923	mRNA
102552939	Dynap	mRNA
102552940	LOC102552940	mRNA
102552988	LOC102552988	mRNA	4.84	7.77	16.89	4.13	6.38	6.28	6.22	6.13	0.406662	0.283094	0.467738
102552996	LOC102552996	mRNA	0	1	0	1	2	3	6	5	-3.02058	0.00043	0.00228298
102553001	LOC102553001	mRNA	125	116	137.71	82.56	109.67	75	89	84.23	0.345473	0.000642	0.00325742
102553002	Zscan22	mRNA	311	334	313	248	263	262	301	291	0.0900191	0.132798	0.26954
102553010	LOC102553010	mRNA	277.56	432.63	232.27	126.13	238.1	124.02	377.51	143.78	0.253972	0.000104	0.000648
102553014	LOC102553014	mRNA	1.62	4.53	9.05	2.76	6.98	1.5	8.35	7.21	-0.441231	0.324227	0.509508
102553031	LOC102553031	mRNA	1	0	0	0	1	0	0	0	-0.0205816	0.991951	0.999178
102553032	LOC102553032	mRNA	0	3.45	1.25	1.24	1.3	0	1.21	1.3	0.62009	0.507394	0.685101
102553035	LOC102553035	mRNA
102553055	LOC102553055	mRNA
102553065	LOC102553065	mRNA	0	4.12	3.68	2.56	0.68	2.24	0	0.12	1.7483	0.0423594	0.111514
102553069	LOC102553069	mRNA
102553085	LOC102553085	mRNA
102553088	LOC102553088	mRNA	23	34	50	18	19	30	20	25	0.390614	0.0462282	0.119383
102553099	LOC102553099	mRNA	55.8	43.88	39.18	46.45	31.1	67.3	15.29	61.03	0.0643144	0.672406	0.807822
102553110	LOC102553110	mRNA
102553119	Mettl21a	mRNA	82.5	86.72	82.02	65.47	79.89	79.36	80.29	82.17	-0.04318	0.705341	0.831361
102553138	LOC102553138	mRNA	1.63	1.66	3.38	0	0	1.66	3.33	1.62	-0.00754513	0.992397	0.995985
102553140	LOC102553140	mRNA	27.56	20.27	31.88	23.18	25.57	26.93	27.44	18.02	0.0502565	0.805055	0.899086
102553148	Cfap58l1	mRNA
102553150	LOC102553150	mRNA
102553158	LOC102553158	mRNA	5.9	1.54	2.86	4.76	5.04	2.3	0	1.64	0.725353	0.225365	0.397907
102553193	LOC102553193	mRNA	0	1.28	0	6.33	4.1	0	0	0	0.871691	0.312608	0.49991
102553196	LOC102553196	mRNA	0	0	1	0	0	1	0	0	-0.0205816	0.991951	0.999178
102553208	LOC102553208	mRNA
102553250	LOC102553250	mRNA	0	3.96	1.36	0	0	1.37	0	0	1.93667	0.118841	0.247264
102553270	LOC102553270	mRNA	10	8	11	7	7	12	4	8	0.195147	0.580378	0.739859
102553278	LOC102553278	mRNA	103.1	85.77	91.9	97.2	108.78	112.96	109.38	90.92	-0.17969	0.0783869	0.180476
102553311	LOC102553311	mRNA
102553316	LOC102553316	mRNA
102553324	LOC102553324	mRNA
102553382	LOC102553382	mRNA	26	26	28	19	22	18	12	25	0.341988	0.117292	0.24468
102553405	LOC102553405	mRNA	21.47	22.65	16.64	20.46	26.08	17.89	30.37	27.45	-0.346271	0.105586	0.225974
102553424	Bhmg1	mRNA	18	14	10	13	15	18	11	20	-0.239222	0.366454	0.55522
102553442	LOC102553442	mRNA	4.04	0	0	0	0	3	0	0	0.408811	0.708505	0.833616
102553456	LOC102553456	mRNA	1	0	0	0	0	0	0	0
102553495	LOC102553495	mRNA	28	42	30	24	31	30	41	37	-0.185326	0.297973	0.485276
102553500	LOC102553500	mRNA
102553503	LOC102553503	mRNA
102553506	LOC102553506	mRNA	8	18	14	4	5	11	15	8.99	0.117283	0.709665	0.834471
102553533	LOC102553533	mRNA	0	0	0	0	0	0	1.24	0
102553538	LOC102553538	mRNA
102553587	Peg10	mRNA	175	182	180	102	96	116	106	138	0.4662	1.1e-07	1.21e-06
102553611	LOC102553611	mRNA	107.03	44.23	84.48	102.47	112.42	70.61	64.47	50.76	0.160767	0.16023	0.310067
102553613	LOC102553613	mRNA
102553620	LOC102553620	mRNA	2.38	3.13	2.11	0	0	3.09	0	1.45	0.726517	0.387806	0.576532
102553656	LOC102553656	mRNA	0	0	0	0	0	0	1.24	0
102553659	LOC102553659	mRNA	19.24	4.7	5.58	19.81	5.36	10.16	0	8.22	1.03456	0.00301365	0.0125363
102553670	LOC102553670	mRNA	14.51	26.6	16.97	12.04	12.07	17.01	12.08	28.83	-0.0179044	0.941447	0.983033
102553671	LOC102553671	mRNA	8	13	22	4	6	7	10	14	0.324554	0.304301	0.490523
102553691	LOC102553691	mRNA
102553715	LOC102553715	mRNA
102553743	LOC102553743	mRNA	0	0	0.9	0	0	0.26	0	0	1.77083	0.546065	0.718156
102553745	Ct47b1	mRNA
102553760	LOC102553760	mRNA	64.43	71.19	64.18	60.4	63.42	39.43	34.73	58.89	0.38473	0.00457593	0.017863
102553763	Znf768	mRNA	501	493	474	493	456	461	502	518	-0.00281603	0.951412	0.989714
102553785	LOC102553785	mRNA	1.42	0	5.21	0	0	4.02	0	1.86	0.152611	0.851734	0.928353
102553814	LOC102553814	mRNA	1.1	2.17	6.79	7.75	4.15	1	4.26	4.14	0.373813	0.470209	0.65279
102553825	LOC102553825	mRNA	187	245	264	111	115	147	101	185	0.537811	1.06e-11	1.94e-10
102553828	LOC102553828	mRNA	48.59	47.55	51.81	38.09	49.61	0.94	41.52	42.04	0.451614	0.00540314	0.0206091
102553842	Hoxd11	mRNA	77	153	188	126	51	143	124	134	0.246702	0.0070893	0.0259078
102553845	LOC102553845	mRNA	7.68	10.3	8.26	3.36	4.87	0	12.39	5.37	0.366779	0.36042	0.549097
102553858	LOC102553858	mRNA	0	0	0	0	0	1	1	0
102553861	LOC102553861	mRNA	0	0	0	1	0	0	0	0
102553866	Zfp764	mRNA	95.21	99.87	94.64	93.75	83.35	87.33	118.15	92.86	-0.0138693	0.894222	0.953116
102553868	LOC102553868	mRNA
102553880	LOC102553880	mRNA
102553881	LOC102553881	mRNA	229.67	180.08	208.37	176.46	187.39	137.41	105.6	183.99	0.350456	5.61e-06	4.51e-05
102553890	LOC102553890	mRNA	2.03	12.28	17.44	12.6	8.81	10.1	16.3	10.66	-0.0691984	0.819816	0.908428
102553892	LOC102553892	mRNA
102553962	LOC102553962	mRNA	41.79	56.13	48.36	57.25	55.65	67.67	61.85	67.14	-0.330538	0.0147356	0.0476619
102553986	LOC102553986	mRNA	5.53	6.57	6.83	3.32	4.64	3.27	3.26	3.39	0.591213	0.218933	0.389629
102554012	LOC102554012	mRNA	0	0	0	0	0	0	0.47	0
102554024	LOC102554024	mRNA
102554031	LOC102554031	mRNA	3	0	0	1	1	1	2	0	-0.0205816	0.983903	1
102554034	LOC102554034	mRNA	345.17	198.03	116.58	107.57	254.88	148.75	337.78	177.11	-0.280008	6.99e-05	0.000453
102554041	LOC102554041	mRNA
102554045	LOC102554045	mRNA	0	0	1	0	0	0	0	0
102554047	LOC102554047	mRNA	2.95	2.03	0.54	2.12	1.21	5.42	2.78	9.16	-1.30191	0.0276452	0.0794695
102554066	LOC102554066	mRNA	8	9	20	12	7	7	9	20	0.167863	0.577235	0.737496
102554096	LOC102554096	mRNA	11.04	3.96	8.97	1.75	14.52	3.36	13.87	3.31	-0.467517	0.209227	0.376341
102554102	Trim30c	mRNA	1.27	1.52	4.75	6.64	9.72	6.1	3.69	2.53	-0.656848	0.175851	0.330997
[truncated: 20,855 more rows]

## Sheet: Suppl. Table 2
Suppl. Table 2 The list of identified DEGs
Gene ID	Gene Symbol	Type	SMIR1 Read Count	SMIR2 Read Count	SMIR3 Read Count	SMIR4 Read Count	Sham1 Read Count	Sham2 Read Count	Sham3 Read Count	Sham4 Read Count	log2 (SMIR_SCDH / Con_SCDH)	Pvalue(SMIR_SCDH / Con_SCDH)	Qvalue (SMIR_SCDH / Con_SCDH)
100134871	LOC100134871	mRNA	34.43	131.54	33.56	63.3	124.35	148.35	69.4	107.75	-0.795896	4.701e-13	9.73133e-12
100359498	Rpl35a	mRNA	118.86	18.61	235.47	130.4	119.86	13.76	120.82	17.66	0.866815	3.0037e-16	8.21311e-15
100359583	LOC100359583	mRNA	435.35	321.11	91.35	174.85	676.87	784.57	487.97	872.02	-1.48468	1.24886e-197	1.75993e-194
100359680	Lpcat2	mRNA	160	129	155	188	264	169	193	177	-0.366057	1.67795e-06	1.48718e-05
100359687	LOC100359687	mRNA	0	51.21	93.05	28.78	123.38	81.56	162	99.91	-1.45244	3.47856e-33	3.07861e-31
100360041	Zfp366	mRNA	164	122	153	122	98	108	72	143	0.393599	2.11042e-05	0.000152336
100360061	LOC100360061	mRNA	7.34	6.01	15.88	0	13.97	53.17	17.61	6.91	-1.66942	3.9356e-09	5.35663e-08
100360679	Rps18l1	mRNA	296.71	6.04	0	0.03	0	1343.87	87.66	1.17	-2.26298	3.13354e-178	4.10046e-175
100360828	LOC100360828	mRNA	105.06	86.71	108.67	194.16	314.09	201.9	73.61	154.26	-0.60935	1.8999e-13	4.08523e-12
100360868	H3f3c	mRNA	895	664.36	539.58	435.72	247.02	63.54	657.42	636.4	0.639195	5.89151e-45	8.11522e-43
100360880	Fosb	mRNA	40	41	51	76	21	38	41	32	0.635464	6.09032e-05	0.000398481
100361383	Ecm2	mRNA	2.39	0	20.52	20.99	7.18	0	0	2.34	2.18461	1.28974e-06	1.16682e-05
100361543	LOC100361543	mRNA	0	0	0	0	0	0	44.84	31.25	-7.27022	8.76075e-19	3.04548e-17
100361946	Lrrc74b	mRNA	27	25	19	15	28	34	45	38	-0.774226	6.07037e-05	0.000397602
100362027	LOC100362027	mRNA	377.4	614.98	1190.56	1091.4	1867.89	450.75	495.98	1276.38	-0.341831	3.8142e-24	2.00794e-22
100362283	Tmem52	mRNA	96	33	74	179	86	41	31	74	0.698866	3.41787e-09	4.6938e-08
100362470	Mrtfb	mRNA	52	52	62	41	20	33	26	42	0.754042	3.32831e-06	2.80989e-05
100362684	LOC100362684	mRNA	0	31.27	0	0	31.27	62.53	0	31.27	-2.02047	4.82561e-15	1.19628e-13
100362733	Irgm2	mRNA	280.92	200.65	189.3	215.78	293.82	255.93	352.64	219.62	-0.360231	2.45853e-08	2.97689e-07
100362967	LOC100362967	mRNA	0	0	0	0	2.97	4.42	9.12	0	-5.06585	2.56848e-05	0.000182453
100362987	LOC100362987	mRNA	0	0	5.65	8.73	21.44	0	21.38	60.15	-2.86067	3.38866e-18	1.11056e-16
100363116	LOC100363116	mRNA	36.49	53.47	52.64	76.36	61.72	53.95	82.85	104.4	-0.488851	0.000120464	0.000735145
100363332	Card11	mRNA	216	144	139	115	228	156	218	175	-0.360258	3.47317e-06	2.9241e-05
100363484	Ddit4l	mRNA	59	49	46	30	82	76	85	75	-0.809903	6.66183e-10	9.9466e-09
100363502	LOC100363502	mRNA	0	1424.05	0	0	25.08	735.35	751.2	1316.75	-1.01056	4.32825e-109	2.73426e-106
100364016	LOC100364016	mRNA	23	21	15.9	9	10.18	0	14	0	1.49011	3.06991e-06	2.60857e-05
100364335	LOC100364335	mRNA	1368.22	1132.89	1223.4	1167.15	766.43	1094.14	937.08	1014.33	0.339202	8.70855e-28	5.55891e-26
100364457	LOC100364457	mRNA	0	0	41.71	0	0	0	0	0	6.36174	2.67604e-11	4.73215e-10
100365679	Dennd5b	mRNA	357	447	427	305	281	303	227	349	0.384472	5.78312e-12	1.08999e-10
100366024	Prdm16	mRNA	435.52	132.63	210.83	168.58	379.42	486.55	472.07	478.65	-0.959605	4.3908e-65	1.14913e-62
100909443	LOC100909443	mRNA	14.44	0	0	0	0	0	0	0	4.83142	0.000103718	0.000644105
100909455	LOC100909455	mRNA	43.24	68.4	83.24	51.38	11.76	61.46	26.38	67.47	0.539148	0.000167518	0.000993502
100909474	LOC100909474	mRNA	15.35	102.98	97.32	81.73	104.99	71.44	80.92	183.2	-0.58758	4.27449e-08	5.00374e-07
100909521	LOC100909521	mRNA	17.41	12.13	44.43	0	0	9.53	9.09	9.27	1.38661	4.64244e-06	3.80705e-05
100909595	LOC100909595	mRNA	569.9	505.54	425.84	316.25	338.28	259.91	337.61	310.48	0.523769	2.29331e-23	1.13244e-21
100909604	LOC100909604	mRNA	332.04	396.08	519.2	146.68	210.66	297.94	177.85	276.78	0.512697	1.18707e-17	3.64273e-16
100909664	LOC100909664	mRNA	111.11	121.15	128.4	74.38	59.44	69.37	55.36	140.51	0.401548	0.000135911	0.000820661
100909732	LOC100909732	mRNA	0	12.87	1.89	0	0	24.61	17.8	0	-1.54329	0.000154587	0.000924897
100909795	LOC100909795	mRNA	16.96	0	0	0	0	0	0	0	5.06348	2.28444e-05	0.000163864
100909799	LOC100909799	mRNA	20	6	3	1	28	17	14	71	-2.13606	1.29952e-16	3.6683e-15
100909824	LOC100909824	mRNA	150.31	121.31	139.9	121.9	88.02	110.27	86.94	104.53	0.432104	6.11312e-06	4.89691e-05
100909849	LOC100909849	mRNA	18.21	15.78	29.04	0	0	4.47	0	0	3.79711	2.44263e-14	5.71507e-13
100909869	LOC100909869	mRNA	90.99	134.84	88.26	106.78	150	135	122.82	138.98	-0.39822	1.91147e-05	0.000139348
100909913	LOC100909913	mRNA	0	0	0	39.29	0	0	0	0	6.27551	9.44552e-11	1.56175e-09
100910021	LOC100910021	mRNA	129.64	19.3	10.7	56.79	110.96	60	111.45	106.39	-0.865709	4.94269e-13	1.01856e-11
100910177	LOC100910177	mRNA	32.36	0	97.09	32.36	0	0	32.36	64.73	0.716325	8.46948e-05	0.000536517
100910207	LOC100910207	mRNA	0	0	0	0	0	0	52.02	0	-6.72158	1.00695e-13	2.23063e-12
100910308	LOC100910308	mRNA	198.04	275.87	371.01	125.52	312.39	388.26	258.55	301.42	-0.398004	8.71162e-11	1.44301e-09
100910446	LOC100910446	mRNA	78.79	0	142.24	0	0	0	108.62	0	1.00437	8.91321e-10	1.31262e-08
100910528	LOC100910528	mRNA	0	0	0	0	11.74	0	11.74	0	-5.57394	4.25838e-07	4.22151e-06
100910688	LOC100910688	mRNA	78.3	22.77	35.56	84.07	109.85	115.49	72.12	40.19	-0.634024	2.83048e-07	2.90339e-06
100910714	LOC100910714	mRNA	0	8.01	2.85	0	10.88	8.04	3.01	14.37	-1.76153	0.000119498	0.000729979
100910771	LOC100910771	mRNA	115.95	34.4	113.44	30.9	38.74	80.04	19.13	41.48	0.695517	2.35217e-07	2.45397e-06
100910864	LOC100910864	mRNA	114.72	104.36	106.45	100.68	55.51	67.29	111.34	79.01	0.424129	7.08625e-05	0.00045792
100910990	LOC100910990	mRNA	260.04	237.03	356.01	266.93	423.18	312.66	373.03	300.25	-0.351864	9.79169e-10	1.43392e-08
100911130	LOC100911130	mRNA	0	0	0	20.07	0	0	0	0	5.30639	3.67302e-06	3.0768e-05
100911132	LOC100911132	mRNA	5	2.01	1	1	12.02	7.01	7.03	30.04	-2.65898	6.43034e-10	9.63237e-09
100911168	LOC100911168	mRNA	6.08	0	36.76	1.65	0	0.6	0	0	6.19179	5.26651e-12	9.95691e-11
100911186	LOC100911186	mRNA	0	0	0	0	42.56	0	85.12	0	-8.01697	1.159e-28	7.83502e-27
100911244	LOC100911244	mRNA	42.12	0	0	0	39.52	50.39	40.96	40.11	-2.04183	2.99241e-20	1.1739e-18
100911261	LOC100911261	mRNA	112.02	84.44	64.12	89.17	77.35	125.69	310.73	76.4	-0.775388	5.46623e-16	1.44922e-14
100911313	LOC100911313	mRNA	105.77	12.52	31.39	0	0	0	0	22.51	2.71266	4.07891e-24	2.13502e-22
100911365	LOC100911365	mRNA	50.69	0	52.56	4.71	17.81	16.43	0	14.82	1.1173	2.98605e-06	2.54321e-05
100911516	LOC100911516	mRNA	0	23.25	23.25	23.25	23.25	69.75	46.5	46.5	-1.43562	5.92842e-14	1.33426e-12
100911519	LOC100911519	mRNA	192.31	157.13	195.81	98.29	120.59	139.92	120.09	119.13	0.344299	5.85288e-05	0.000385008
100911545	LOC100911545	mRNA	233.95	109.18	202.76	109.18	140.37	93.58	140.37	109.18	0.417552	1.2032e-06	1.09502e-05
100911581	Faah	mRNA	22.22	88.86	33.32	44.43	22.22	11.11	44.43	11.11	1.06674	2.66715e-09	3.71859e-08
100911585	LOC100911585	mRNA	1.15	0	148.2	3.13	2.44	0.1	0	0	5.88707	1.62919e-37	1.75569e-35
100911597	Myh9l1	mRNA	657.6	519.15	484.54	726.82	553.77	380.71	242.27	553.77	0.444082	9.80581e-23	4.66604e-21
100911625	LOC100911625	mRNA	370.96	346.61	696.09	206.38	48.76	377.55	99.69	95.8	1.36093	4.01127e-99	2.16136e-96
100911672	LOC100911672	mRNA	0	294.31	100.74	414.36	0	780.65	0	402.98	-0.568857	2.70795e-18	8.95482e-17
100911674	LOC100911674	mRNA	303.97	133.25	0	227.36	127.27	2.87	244.89	134.63	0.362326	1.83359e-05	0.000134151
100911725	LOC100911725	mRNA	26.49	0	0	18.75	0	0	0	0	6.47895	4.34813e-12	8.3237e-11
100911730	LOC100911730	mRNA	0	117.28	0	0	0	0	0	0	7.85323	1.71481e-26	1.0134e-24
100911881	LOC100911881	mRNA	48.63	55.58	27.79	34.74	97.27	27.79	83.37	49.24	-0.648506	4.73461e-06	3.87396e-05
100911951	LOC100911951	mRNA	4.13	18.79	3.37	102.13	87.47	110.23	168.71	35.12	-1.66522	9.1507e-35	8.68605e-33
100911959	LOC100911959	mRNA	455.49	281.42	118.68	370.3	480.64	540.19	961.82	428.05	-0.996204	3.92852e-91	1.89396e-88
100912012	Clec3b	mRNA	29	24	22	29	38	30	82	26	-0.779574	8.81506e-06	6.8313e-05
100912019	LOC100912019	mRNA	3.62	0	1.48	0	5.94	4.98	13.77	19.29	-3.12886	2.94144e-09	4.07311e-08
100912034	LOC100912034	mRNA	0	0	0	0	20.07	0	20.07	0	-6.34755	4.54736e-11	7.83703e-10
100912042	LOC100912042	mRNA	24.5	46.66	46.88	20.18	26.31	141.1	54.92	52.18	-1.01047	4.76782e-12	9.07967e-11
100912228	LOC100912228	mRNA	0	48.09	48.09	48.09	96.18	0	96.18	48.09	-0.757547	4.03501e-07	4.01965e-06
100912259	LOC100912259	mRNA	0	0	0	0	0	10.07	9.95	20.4	-6.35758	3.92386e-11	6.82669e-10
100912471	LOC100912471	mRNA	2	13.66	0	18.39	5.91	0	41.27	62.19	-1.70407	6.81555e-11	1.14132e-09
100912475	LOC100912475	mRNA	8.39	22.65	0	0	0	0.16	0	0	7.57933	2.92761e-08	3.49633e-07
100912571	LOC100912571	mRNA	0	0	0	0	0	0	215.41	0	-8.77152	1.272e-43	1.65269e-41
100912590	LOC100912590	mRNA	0	0	0	0	0	0	17.92	17.92	-6.18408	4.48098e-10	6.82958e-09
100912604	LOC100912604	mRNA	241	0	0	241	241	482	0	0	-0.605544	5.5444e-13	1.13871e-11
100912609	LOC100912609	mRNA	5.69	0	8	0	0	0	0	0	4.75447	0.000163702	0.000973393
102547029	LOC102547029	mRNA	140.42	194.71	10.72	12.62	27.34	290.26	114.65	159.13	-0.742815	5.61623e-15	1.38852e-13
102547059	LOC102547059	mRNA	138.1	107.38	135.37	57.38	128.1	146	162.1	136.1	-0.405665	8.60483e-06	6.7024e-05
102547271	LOC102547271	mRNA	8.13	0	11.48	0	15.65	25.92	0	12.37	-1.48035	3.50544e-05	0.000240523
102548730	LOC102548730	mRNA	183.06	249.82	302.38	113.59	138.13	156.06	136.92	157.3	0.508106	3.57624e-11	6.23969e-10
102549803	Nat8f4	mRNA	117.38	111.98	119.46	140.03	63.51	143.51	102.18	62.23	0.37572	0.000143875	0.000864193
102550456	LOC102550456	mRNA	0	0	70.12	0	0	0	0	0	7.11117	2.22775e-17	6.6796e-16
102551034	Crocc2	mRNA	89	87	61	13	67	74	138	72	-0.510125	1.68248e-05	0.000124286
102551177	LOC102551177	mRNA	195.94	247.28	331.35	90.23	143.71	161.72	120.04	176.14	0.502956	3.57412e-11	6.24194e-10
102551403	Ankfn1	mRNA	83	150	203	65	74	74	94	116.24	0.463303	2.95446e-06	2.51982e-05
102551453	LOC102551453	mRNA	8.45	0	1	0	5.03	6.23	4	21.45	-1.97837	2.85386e-05	0.000200164
102553587	Peg10	mRNA	175	182	180	102	96	116	106	138	0.4662	1.10271e-07	1.21259e-06
102553825	LOC102553825	mRNA	187	245	264	111	115	147	101	185	0.537811	1.06308e-11	1.94368e-10
102553881	LOC102553881	mRNA	229.67	180.08	208.37	176.46	187.39	137.41	105.6	183.99	0.350456	5.61385e-06	4.51474e-05
102554594	LOC102554594	mRNA	0	23.27	0	0	0	0	0	0	5.51982	5.8323e-07	5.62356e-06
102554658	LOC102554658	mRNA	36	36	23	16	44	44	75	47	-0.940411	1.23124e-08	1.55454e-07
102555039	LOC102555039	mRNA	5.76	0	0	0	0	0	18.07	33.36	-3.17905	1.01751e-10	1.67482e-09
102555341	LOC102555341	mRNA	22.13	19.78	14.66	9	1.44	8	0	7.65	1.9193	5.24539e-08	6.05517e-07
102556031	Coa6	mRNA	10210.8	7822.61	7333.35	9345.73	11961.7	15652.4	17024.3	15692.2	-0.818015	0	0
102556148	LOC102556148	mRNA	38.84	43.16	43.16	21.58	77.69	38.84	77.69	73.37	-0.887344	9.22467e-10	1.3574e-08
102556337	LOC102556337	mRNA	261.13	164.32	458.35	361.71	147.25	370.69	220.98	111.34	0.530179	7.67346e-17	2.20687e-15
102557368	LOC102557368	mRNA	63.74	25.4	43.76	90.05	19.99	30.83	37.97	4	1.2441	2.61164e-13	5.54406e-12
103689921	NEWGENE_1306267	mRNA	67.8	16.57	11.77	89.55	134.63	133.69	202.97	120.89	-1.69372	1.24852e-51	2.17837e-49
103689931	LOC103689931	mRNA	540.11	0	450.83	555.49	0.01	0.1	77.71	0.01	4.29189	0	0
103689932	NEWGENE_621351	mRNA	150.02	93.76	93.76	250.04	125.02	162.52	406.31	112.52	-0.477238	8.41112e-10	1.24167e-08
103689934	LOC103689934	mRNA	86.64	90.47	84.85	61.24	71.44	74.85	164.18	120.36	-0.435273	3.76909e-05	0.000256881
103689936	Wbp11l1	mRNA	596.23	0.01	0.3	0.3	623.23	158.84	0.1	0.04	-0.410793	1.4169e-07	1.52962e-06
103689941	LOC103689941	mRNA	15.74	37.77	0	0	0	146.35	308.35	84.15	-3.35258	1.01679e-101	5.6447e-99
103689951	LOC103689951	mRNA	38.07	0	0	34.87	66.52	54.47	160.93	0	-1.97109	5.91871e-31	4.61407e-29
103689966	LOC103689966	mRNA	17.45	20	0	11.89	16.64	0	0	0	1.54752	4.9044e-05	0.000328034
103689978	LOC103689978	mRNA	6.17	6	11.76	5.06	432.22	0	3.31	8.6	-3.95794	7.23126e-95	3.78505e-92
103689983	LOC103689983	mRNA	0	15.97	15.97	0	0	0	0	0	5.97671	4.74017e-09	6.32944e-08
103690002	LOC103690002	mRNA	0	0	0	0	0	0	11.9	11.9	-5.59347	3.54399e-07	3.55564e-06
103690047	NEWGENE_1308624	mRNA	81.52	64.56	66.94	67.8	49.92	36.21	34.11	62.95	0.595723	1.09567e-05	8.39155e-05
103690050	LOC103690050	mRNA	377.85	484.87	614.15	293.43	290.99	227.92	362.26	335.24	0.520783	1.39668e-22	6.51076e-21
103690057	LOC103690057	mRNA	113.4	51.31	70.89	60.48	0	11.65	90.4	0	1.51613	1.15586e-22	5.47168e-21
103690092	LOC103690092	mRNA	4.27	0.02	10.14	0.06	2.08	2.78	8.69	40.08	-1.90856	7.8511e-07	7.40258e-06
103690102	LOC103690102	mRNA	27.23	0	47.33	15.78	41.54	0	0	0	1.10028	2.4331e-05	0.000173441
103690105	LOC103690105	mRNA	32.01	81.67	62.89	4.92	31.5	62.1	7.13	7.2	0.729213	2.35428e-05	0.000168347
103690120	LOC103690120	mRNA	41.97	63.69	0	66.16	0	28.42	15.49	23.63	1.3265	1.49769e-11	2.71124e-10
103690123	Hoxa2	mRNA	60.84	62.44	54.31	38.01	65.19	91.63	112.09	79.37	-0.712472	7.43986e-09	9.70094e-08
103690147	LOC103690147	mRNA	145.47	326.16	192.61	87.81	144.41	145.58	129.5	170.98	0.328383	3.25434e-05	0.000225234
103690173	LOC103690173	mRNA	0	27.04	0	0	0	0	0	0	5.73644	6.99051e-08	7.90044e-07
103690175	LOC103690175	mRNA	3.92	0	34	54.45	0	0	0	0	7.50877	8.45465e-22	3.69664e-20
103690996	LOC103690996	mRNA	69.05	167.58	0	84.22	139.7	260.78	117.51	174.97	-1.13145	2.13091e-33	1.92307e-31
103691005	LOC103691005	mRNA	67.63	66.25	58.13	72.03	81.3	112.11	67.63	102.58	-0.482257	3.17164e-05	0.00022026
103691035	LOC103691035	mRNA	3.61	1.8	6.57	5.08	0	1.12	0	0	3.90847	6.19715e-05	0.000405037
103692570	LOC103692570	mRNA	23.32	10.3	31.67	0	0	0	0	0	7.00821	2.20006e-16	6.10684e-15
103692716	LOC103692716	mRNA	473.6	157.87	157.87	105.25	263.11	315.74	263.11	420.98	-0.518069	1.24591e-16	3.5224e-15
103692976	LOC103692976	mRNA	0	0	0	0	0	24.66	22.48	0	-6.57946	1.19865e-12	2.41046e-11
103693323	LOC103693323	mRNA	1423.41	999.35	1000.99	1058.52	2472.07	1296.85	1000.99	826.76	-0.340921	2.86014e-32	2.3926e-30
103693432	Ptges3l	mRNA	75.3	93.26	76.73	83.64	96.66	109.39	109.51	117.06	-0.415901	7.51936e-05	0.000482503
103693608	LOC103693608	mRNA	0	0	0	0	28.53	0	114.12	28.95	-8.44349	2.24009e-36	2.29265e-34
103693640	LOC103693640	mRNA	0	0	0.74	0	0	53.35	71.87	0	-7.42331	1.49414e-29	1.05279e-27
103693666	Zbed6	mRNA	1010.22	901.22	1037.23	713	762	718	459.14	771	0.413553	5.44853e-30	3.961e-28
103693780	LOC103693780	mRNA	1766.79	1433.25	1152.19	1362.04	1358.38	2165.89	2085.79	1858.01	-0.406748	2.03228e-58	4.38016e-56
103694069	LOC103694069	mRNA	52.52	56.74	76.89	50.34	34.25	28.46	32.52	62.32	0.565388	0.000118075	0.000722487
103694306	LOC103694306	mRNA	67.43	46.06	38.84	94.19	38.41	306.69	207.79	27.47	-1.25583	5.03615e-33	4.41446e-31
103694424	LOC103694424	mRNA	59	54	55	40	35	33	30	36	0.613769	0.000101495	0.00063137
103694855	LOC103694855	mRNA	0	0	3.56	0	0	0	25.43	12.71	-3.44194	8.47496e-09	1.09416e-07
103694869	LOC103694869	mRNA	345.47	0	172.74	0	0	0	0	0	9.99681	4.90671e-86	2.19246e-83
103694872	LOC103694872	mRNA	840	598.5	588	997.5	756	525	567	535.5	0.322795	2.44696e-16	6.74111e-15
103694877	LOC103694877	mRNA	69.73	60.99	77.47	71.66	4.78	63.92	42.55	0	1.31027	1.45515e-17	4.43567e-16
103694903	LOC103694903	mRNA	339.97	716.29	398.15	181.86	683.22	221.47	606.58	516.69	-0.3302	4.92898e-12	9.3574e-11
103694905	LOC103694905	mRNA	0	169.93	179.76	0	0	109.44	0	51.99	1.09459	1.34428e-16	3.78881e-15
103694908	LOC103694908	mRNA	120.96	89.13	146.79	27.18	97.77	154.21	143.86	117.86	-0.440176	5.44269e-06	4.39832e-05
108348045	NEWGENE_1310680	mRNA	169.87	0	0	0	0	0	0	0	8.38771	9.54241e-36	9.65839e-34
108348047	LOC108348047	mRNA	118.84	140.16	172.49	185.03	219.75	202.22	169.66	247.06	-0.464572	1.02147e-09	1.49229e-08
108348048	LOC108348048	mRNA	171.88	124.68	8.87	58.5	18.07	14	106.7	403	-0.594601	8.19139e-10	1.21217e-08
108348064	LOC108348064	mRNA	229.86	259.1	324.32	429.23	551.92	259.38	591.07	293.85	-0.469647	1.77432e-18	5.9534e-17
108348065	LOC108348065	mRNA	50.74	0	46.78	0	33.88	0	0	0	1.50468	2.25249e-08	2.74191e-07
108348070	LOC108348070	mRNA	0	59.61	0	50.76	33.7	0	16.4	0	1.11888	2.25578e-06	1.9521e-05
108348079	LOC108348079	mRNA	0	0	50.05	0	0	0	0	0	6.62472	3.80439e-13	7.95621e-12
108348080	LOC108348080	mRNA	0	35.19	0	0	0	0	0	0	6.11651	8.25304e-10	1.21932e-08
108348085	LOC108348085	mRNA	0	0	34.29	0	34.29	68.59	34.29	0	-2.02069	2.36342e-16	6.52076e-15
108348094	NEWGENE_1306399	mRNA	0	78.1	88.83	0	32.44	125	106.57	99.74	-1.14429	1.31892e-18	4.49956e-17
108348098	LOC108348098	mRNA	96.82	193.64	116.18	77.45	77.45	77.45	96.82	96.82	0.453369	6.67974e-06	5.31363e-05
108348102	LOC108348102	mRNA	5.9	23.62	23.63	47.7	5.9	0	5.9	5.9	2.48981	2.15277e-15	5.50051e-14
108348112	LOC108348112	mRNA	54.12	0	18.15	229.75	0	167.68	510.44	0	-1.18748	3.28503e-35	3.20116e-33
108348118	LOC108348118	mRNA	128.6	439.76	53	291.16	9.1	213.19	224.48	7.67	0.985185	1.60599e-34	1.50111e-32
108348120	LOC108348120	mRNA	357.33	501.33	474.67	338.67	346.67	322.67	314.67	328	0.329215	5.2977e-10	8.01435e-09
108348128	LOC108348128	mRNA	1.68	0	0.68	0	13.56	0	2.47	9.63	-3.46324	2.18805e-06	1.89886e-05
108348155	LOC108348155	mRNA	0	17.31	17.2	0	21.56	13.03	30.26	15.68	-1.24309	9.69792e-06	7.47438e-05
108348178	Vps37c	mRNA	181.57	288.96	211.77	196.07	315.95	237.01	443.35	150.45	-0.405244	3.12376e-10	4.8954e-09
108348912	LOC108348912	mRNA	63.73	73.87	29.25	82.43	74.13	24.56	48.73	16.1	0.587718	4.25676e-05	0.000287445
108349777	LOC108349777	mRNA	5.05	4.37	12.32	1.56	0	0	0	0	5.52168	5.73357e-07	5.54003e-06
108350747	LOC108350747	mRNA	45	14.81	22.73	63.07	17.84	14.37	7.1	6	1.66363	1.99945e-13	4.2842e-12
108351482	LOC108351482	mRNA	136.58	102.76	91.11	158.12	187.45	172.84	136.83	145.8	-0.416656	1.33373e-06	1.20543e-05
108351703	LOC108351703	mRNA	27.29	32.49	14.14	27.09	24.96	10.74	40.57	123.88	-1.00717	3.94784e-09	5.3693e-08
108352191	LOC108352191	mRNA	6.6	20.84	14.73	19.91	6.36	6.28	6.78	4.08	1.38089	2.87797e-05	0.000201623
108352957	LOC108352957	mRNA	126.06	203.81	230.6	125.35	94.63	116.99	60.74	193.12	0.538529	3.5155e-10	5.46723e-09
108352965	LOC108352965	mRNA	121.01	69.11	87.97	161.32	67.08	80.3	111.24	24.29	0.614643	1.54236e-08	1.91826e-07
114247	Slfn4	mRNA	155.84	55.87	88.5	88.62	112.27	113.51	277.59	91.64	-0.634356	9.1667e-12	1.68608e-10
114501	Lmx1b	mRNA	133	220	289	96	118	118	156	170	0.372469	3.60513e-06	3.02685e-05
114507	Slc5a3	mRNA	60	36	40	37	23	21	26	36	0.686126	9.09915e-05	0.00057284
114519	Nfil3	mRNA	297	233	361	480	246	220	259	237	0.490538	3.70299e-16	1.00057e-14
114593	Nppc	mRNA	222	337	480	228	214	199	314	239	0.37074	1.50303e-09	2.14785e-08
114633	Plce1	mRNA	257	161	183	262	156	208	147	166	0.329623	7.94383e-06	6.22992e-05
114851	Cdkn1a	mRNA	436	349	400	1931	429	411	321	315	1.05742	2.66989e-127	2.32916e-124
115771	Usp2	mRNA	301.98	310	299.99	556.99	224.96	269.89	273.79	291.96	0.449333	7.20225e-15	1.77108e-13
116557	Foxj1	mRNA	351	283	189	160	357	306	371	329	-0.492104	2.28414e-16	6.32106e-15
116599	Blvra	mRNA	260	378	433	384	479	460	486	407	-0.352982	2.73508e-12	5.29669e-11
116638	Slc17a7	mRNA	53	34	16	48	97	60	37	36	-0.627667	2.67226e-05	0.000188727
116668	Myt1l	mRNA	819	1120	1153	576	579	682	678	864	0.36744	2.01841e-24	1.08121e-22
116669	Vwf	mRNA	1266	966	671	782	1117	945	1699	993	-0.388059	8.45431e-35	8.06682e-33
116671	Cdk5r1	mRNA	342	539	520	295	243	330	333	400	0.3564	1.59396e-11	2.87698e-10
116681	Dlgap2	mRNA	130	172	183	102	100	107	79	140	0.441925	1.27434e-06	1.15402e-05
116777	Cdh3	mRNA	69	92	149	69	35	46	91	87	0.528664	4.50734e-06	3.70621e-05
117088	Adarb2	mRNA	535.83	474.6	523.98	456.76	384.97	387.08	383.33	389.89	0.345176	1.3822e-12	2.75838e-11
117249	Dnah3	mRNA	17	15	6	5	20	28	22	23	-1.13348	9.96628e-06	7.66508e-05
117250	Dnah6	mRNA	18	23	14	13	30	29	48	30	-1.03115	6.85934e-07	6.54495e-06
117560	Klf9	mRNA	1807	1354	1767	2258	1329	1385	1274	1412	0.391648	7.41799e-52	1.31939e-49
140661	Rplp1	mRNA	0	0	13.83	0	0	28.25	13.24	0	-1.60554	0.000117397	0.000718583
140675	Gabra4	mRNA	171	191	222	141	129	117	154	143	0.396447	1.13135e-06	1.03528e-05
140726	Cacng5	mRNA	249	396	440	215	195	213	352	233	0.368064	1.19522e-09	1.73369e-08
140933	Trpc5	mRNA	275	405	464	245	178	270	253	299	0.453465	2.34286e-14	5.49567e-13
140942	Ddit4	mRNA	1816	1326	1963	2882	1608	1446	1373	1654	0.372764	1.56677e-52	2.87031e-50
170512	Ifi27	mRNA	1375	927	795	1226	1556	1134	1763	1192	-0.405522	2.36246e-44	3.13625e-42
170840	Slc40a1	mRNA	0	5.15	0	35.25	0	0	0	0	6.3157	5.28801e-11	9.01175e-10
170905	Lfng	mRNA	1173	865	1025	2248	873	822	873	938	0.578576	1.87282e-77	7.14793e-75
170955	Zfp483	mRNA	393	449	583	346	290	345	361	395	0.32786	1.93474e-10	3.09558e-09
171026	Akap5	mRNA	135	214	209	133	132	110	130	152	0.378537	5.33327e-06	4.32326e-05
171078	Mlxipl	mRNA	236	190	182	96	260	207	180	230	-0.337583	3.51588e-06	2.95599e-05
171146	Kcnh5	mRNA	75	135	161	73	50	71	51	94	0.718552	6.62455e-11	1.11239e-09
171339	Dnah1	mRNA	57	55	39	28	52	81	72	75	-0.666049	1.03659e-06	9.52377e-06
171352	Cyp3a9	mRNA	99	102.01	107.75	92.01	138	115.02	140.02	124.01	-0.388111	4.93599e-05	0.000329786
171492	Map3k2	mRNA	81	71	76	65	57	42	35	65	0.537551	4.23676e-05	0.000286305
192155	Sftpb	mRNA	1	7	3	13	0	0	2	0	3.56438	4.25668e-06	3.52383e-05
24208	Ar	mRNA	94.99	134.04	143.1	73.29	54.27	74	66.08	133.97	0.419482	5.80351e-05	0.000381898
24265	Ckm	mRNA	3	15	17	14	1	3	1	5	2.2722	1.60783e-07	1.71352e-06
24380	Gad2	mRNA	345	661	692	294	264	336	425	350	0.514204	1.14607e-24	6.26745e-23
24388	Gfi1	mRNA	79.29	19.84	41.23	58.45	66.25	60.55	94.08	68.44	-0.561857	2.00096e-05	0.000145409
24409	Grin2a	mRNA	301	485	589	325	222	272	226	364	0.628588	7.28339e-30	5.25322e-28
24418	Grm5	mRNA	590	816.67	996.01	461.01	397	419.01	567.01	642	0.479358	9.33452e-31	7.15516e-29
24440	Hbb	mRNA	75.44	64.05	17.62	24.46	70.56	115.38	150.03	169.29	-1.49708	2.40123e-37	2.5428e-35
24483	Igf2	mRNA	601	471	429	675	477	588	1729.93	377	-0.564264	1.2906e-45	1.81876e-43
24564	Mpz	mRNA	83	32	300	3173	70	75	621	19	2.17183	0	0
24567	Mt1	mRNA	506	326	531	1222	413	335	572	403	0.56466	4.91778e-37	5.14822e-35
24590	Mme	mRNA	110	119	148	106	74	97	99	95	0.383545	0.000117125	0.000717396
245960	Alg10	mRNA	116	128	136	155	107	78	84	110	0.476759	7.09783e-07	6.75492e-06
245963	Egfl7	mRNA	277.52	368.31	244.12	261.6	295.07	389.17	421.78	319.59	-0.328584	8.17345e-09	1.05747e-07
24598	Nos1	mRNA	294.03	302	344.6	224.06	181.82	196.6	188.11	278.44	0.442392	8.52029e-12	1.57828e-10
24602	Nppa	mRNA	127	123	59	140	127	151	103	182	-0.347001	0.000136947	0.000826102
246208	Ifi47	mRNA	78	48	43	51	97	48	103	58	-0.49661	8.82773e-05	0.000557284
246245	Fmo2	mRNA	95.71	24	32	104	28	36	35	11	1.19642	3.09511e-14	7.16844e-13
246268	Oas1b	mRNA	166.07	114.09	79.64	121.69	133.03	163.27	202.31	120.29	-0.382782	1.16786e-05	8.90723e-05
24628	Pdgfb	mRNA	234	289	198	220	285	314	299	290	-0.35685	1.2906e-08	1.62166e-07
246304	Cep350	mRNA	568	561	597	461	427	426	315	494	0.375451	9.344e-16	2.44546e-14
24773	Sftpa1	mRNA	0	1	5	8	0	0	0	0	4.78677	0.000135512	0.000818522
24795	Serpina3n	mRNA	23	18	50	104.95	19	14	12	27	1.42384	2.83123e-14	6.58225e-13
24807	Tacr1	mRNA	328.1	472.46	499.51	301.14	210.26	351.64	347.84	321.73	0.358199	4.73447e-11	8.12892e-10
24838	Tnnt3	mRNA	5	29	43	29	12	10	15	10	1.15275	2.06645e-06	1.80445e-05
24922	Gabrb3	mRNA	354.28	577.69	565.96	317.01	253.93	320.17	376.47	373.79	0.434045	5.44337e-17	1.58541e-15
24947	Gabra3	mRNA	571.56	807.43	840.04	557.4	440.44	512.19	653.73	576.25	0.326595	1.98376e-15	5.08998e-14
24973	RT1-A1	mRNA	533.57	437.46	231.68	451.89	547.46	497.52	596.27	525.57	-0.409678	2.38025e-18	7.94284e-17
25021	Itgam	mRNA	285	255.1	284	295.17	387	309	336.24	361	-0.336467	5.61695e-09	7.41372e-08
25043	Eln	mRNA	122	162	169	309	112	154	517	169	-0.341752	1.01593e-06	9.34329e-06
25049	Atxn1	mRNA	160.8	194.42	216.49	138.33	103.63	136.19	127.69	167.85	0.386809	2.50682e-06	2.15509e-05
25059	Hk2	mRNA	238.36	163.92	196.95	152.69	291.37	208.45	243.79	222.24	-0.381802	4.68299e-08	5.44714e-07
25061	Crabp1	mRNA	181	304	394	177	136	201	267	222	0.333815	5.7278e-07	5.53738e-06
25111	Chrm4	mRNA	65	117	130	64	45	66	74	78	0.495088	1.68394e-05	0.000124344
25113	Ddn	mRNA	38	71	78	29	19	39	45	37	0.605023	9.21001e-05	0.000578229
25132	Myo5b	mRNA	235	373	362	181	159	211	224	279	0.378253	4.36308e-09	5.88166e-08
25134	Gnmt	mRNA	0	6	9	3.73	12	18	8	16	-1.54819	1.87478e-05	0.000136836
25204	Pcsk1	mRNA	78.43	125.97	161.76	73.49	65.56	106.06	65.14	75.8	0.471641	8.55489e-06	6.67201e-05
25211	Lyz2	mRNA	644.42	560.82	625.52	893.72	998.62	719.56	1589.15	618.12	-0.547459	3.8162e-53	7.0619e-51
25245	Bdkrb2	mRNA	36	34	46	18	19	22	17	17	0.816689	6.12668e-05	0.000400574
25248	Cnr1	mRNA	834	1186	1243	773	601	799.01	941	816	0.333786	1.44623e-22	6.70758e-21
25278	Cox6a2	mRNA	323	132	101	143	157	101	127	164	0.327905	6.3298e-05	0.00041297
252880	Drgx	mRNA	87	182	213	89	78	92	141	122	0.378542	3.51478e-05	0.000240983
252958	Ppp1r32	mRNA	51	85	40	47	71	64	122	81	-0.620561	4.66201e-07	4.59182e-06
252959	Dnah12	mRNA	517	330	415	201	623	401	450	411	-0.386216	1.21741e-14	2.91923e-13
25311	Dcc	mRNA	320	301	364	250	220	237	244	259	0.342823	2.94541e-08	3.51302e-07
25314	Emp1	mRNA	134	125	103	161	125	166	235	159	-0.409875	8.88155e-07	8.28462e-06
25333	Mgp	mRNA	214	212	186	412	288	259	535	242	-0.391269	5.9901e-11	1.01235e-09
25340	Npy5r	mRNA	100	132	154	83	75	93	110	67	0.42241	3.29003e-05	0.000227533
25341	Tnfrsf11b	mRNA	320.99	316.45	273.58	194.55	376.29	369.03	476.51	332.04	-0.511657	1.09336e-19	4.06294e-18
25375	Aldh3a1	mRNA	4	0	1	3	7	3	2	37	-2.63529	9.0663e-09	1.16558e-07
25380	Anxa1	mRNA	27	14	14	39	37	26	70	25	-0.769774	3.11214e-05	0.000216538
25399	Cacna2d1	mRNA	949	1158	1405	859	677	750	1038	913	0.351212	1.38993e-26	8.2943e-25
25400	Camk2a	mRNA	665	943	1129	481	497	541	639	817	0.347121	1.35563e-19	4.99701e-18
25493	Nfkbia	mRNA	598	457	605	1004	463	419	548	514	0.433984	3.40287e-24	1.80175e-22
25514	Lypla1	mRNA	161	369	366	427	414	372	461	385	-0.32341	1.22939e-09	1.77902e-08
25547	St8sia3	mRNA	239	332	298	194	162	207	210	250	0.338116	3.82274e-07	3.82066e-06
25569	Trh	mRNA	66	147	157	91	57	85	105	101	0.385098	0.000158389	0.000945173
25575	Scgb1a1	mRNA	0	4	10	7	0	0	0	0	5.37174	2.14299e-06	1.86506e-05
25589	Kdr	mRNA	177	163	160	92	177	209	210	207	-0.460384	3.12042e-09	4.30468e-08
25601	Oprm1	mRNA	53	91	87	38	46	41	29	46	0.711031	4.77201e-07	4.68506e-06
25626	Krt8	mRNA	46.44	15	27	12	54.82	55.54	38.11	175.59	-1.71051	2.04551e-29	1.42485e-27
25632	Hba-a1	mRNA	396.91	592.35	141.74	190.94	574.58	1166.35	867.21	1233.08	-1.55949	2.79862e-288	4.27256e-285
25641	Igfbp6	mRNA	158	231	122	398	310	355	294	188	-0.356095	2.4441e-08	2.96529e-07
25662	Igfbp2	mRNA	754	1066	575	1181	898	992	1559	1294	-0.428035	2.55055e-41	3.09444e-39
25706	Cckbr	mRNA	85	109	226	99	106	73	138	71	0.399096	3.41653e-05	0.000235392
25743	Kcnj6	mRNA	731.32	1225.54	1391.12	643.05	557.9	672.59	839.96	796.8	0.456512	1.0163e-38	1.13528e-36
25749	Clcn5	mRNA	127	157	142	81	65	106	62	104	0.568656	1.4562e-08	1.81727e-07
257648	Cacna1b	mRNA	1111.56	1596	1688	865	856	972	1072	1192	0.341829	3.62085e-30	2.66401e-28
259269	Erc2	mRNA	242	335	353.62	218	177	216	206	291	0.347443	6.13072e-08	6.9891e-07
259273	Kcnq5	mRNA	190	286	287	171	131	172	165	226	0.407905	1.40407e-08	1.7546e-07
266715	Fzd3	mRNA	171	168	190	148	116	109	102	146	0.496734	6.96877e-09	9.11914e-08
266774	Zfp597	mRNA	119	153	172	101	89	104	96	128	0.365627	9.12267e-05	0.000573729
266777	Nptx1	mRNA	2656	4569.99	4795.01	2579	2108	2691	3296	3111	0.361115	3.71892e-89	1.70326e-86
266998	Slc13a5	mRNA	344	208	170	255	184	172	183	207	0.368601	1.30043e-07	1.41472e-06
286761	Vcpip1	mRNA	452	503	483	445	352	399	292	441	0.32296	9.6684e-11	1.59572e-09
286918	Mx2	mRNA	650.58	352.44	372.17	368.86	536.04	539.71	737.13	427.76	-0.382051	8.37517e-17	2.40114e-15
286925	Cryba2	mRNA	7	10	5	9	21	35	5	8	-1.17491	8.99271e-05	0.000566723
286958	Np4	mRNA	3	0	1	0	8	4	11	5	-2.82794	6.51022e-06	5.19004e-05
286970	Abca5	mRNA	524	740	658	519	395	505	500	511	0.332563	3.58098e-14	8.24166e-13
287346	Fam183a	mRNA	15	26	2	12	25	29	55	23	-1.28362	6.34311e-09	8.33614e-08
287422	Per1	mRNA	1453	992	1448	1254	791	730	747	852	0.701604	4.51517e-105	2.75726e-102
287702	Krt17	mRNA	13.61	2	8	8	23	26.77	24	21.59	-1.61358	4.62565e-09	6.19458e-08
287706	Klhl11	mRNA	497	578	591	437	362	430	355	509	0.324165	6.70678e-12	1.2512e-10
288025	Plaat1	mRNA	209	159	190	196	117.1	159	167.82	143	0.340819	1.6434e-05	0.000121694
288031	Fam43a	mRNA	853.65	602.02	900.68	1319.27	729.01	585.56	609.08	573.8	0.53695	1.47229e-47	2.2858e-45
288080	Stxbp5l	mRNA	237	323	293	236	205	219	176	250	0.336888	3.02761e-07	3.07972e-06
288118	Tmprss7	mRNA	121	65	114	32	72	49	66	44	0.502709	4.12527e-05	0.000279493
288289	Chodl	mRNA	737	857	212	1054	916	1295	423	965	-0.352163	1.41304e-22	6.57028e-21
288449	Katnal1	mRNA	182.12	164.13	29.85	217.57	191.01	296.08	90.74	257.76	-0.513716	2.35228e-11	4.17981e-10
288475	Nptx2	mRNA	281	260	271	478	217	233	223	259	0.448388	3.40386e-13	7.15122e-12
288689	Tesc	mRNA	207	302	162	329	337	332	217	363	-0.341355	2.22818e-08	2.71592e-07
288691	Ksr2	mRNA	323	443	450	222	198	303	179	358	0.449676	1.32016e-14	3.15324e-13
289180	Gpr161	mRNA	362	507	491	227	215	288	325	351	0.408157	1.37264e-13	2.99723e-12
289378	Tatdn3	mRNA	107	149	118	148	163	129	169	211	-0.384993	4.38376e-06	3.61434e-05
289392	Plxna2	mRNA	923	1169	1286	724	693	734	749	898	0.395629	6.92093e-31	5.37251e-29
289491	Mrpl1	mRNA	143	113.79	37.95	138.22	53.62	101.44	0	46.09	1.08538	6.31282e-20	2.37965e-18
289712	Evc	mRNA	449	559.55	416.75	619.76	847.7	617	611.79	698.7	-0.461025	2.76003e-28	1.81884e-26
289733	Pla2g3	mRNA	573	621	643	1943	864	786	518	614	0.421682	5.57662e-32	4.62279e-30
291005	Gadd45g	mRNA	116	115	142	318	128	124	158	123	0.353969	1.92002e-05	0.00013986
291022	Ptpdc1	mRNA	871	748	884	1514	701	760	746	785	0.404427	1.77896e-31	1.4357e-29
29130	Syn3	mRNA	241.17	345.14	355.48	163.69	158.38	237.43	183.83	237.34	0.415719	3.35452e-10	5.23465e-09
291328	Slc39a12	mRNA	108	340	380	105	87	377	462	409	-0.537472	1.35982e-18	4.62189e-17
29139	Dcn	mRNA	154	107	138	343	186	239	431	91	-0.372527	1.24707e-07	1.3599e-06
291549	Oacyl	mRNA	39.67	45.28	17.17	53.52	72.29	30.32	65.4	67.37	-0.61736	2.83565e-05	0.000198963
291567	Ppargc1b	mRNA	104	129	115	64	61.88	79	57	108.31	0.407636	0.000166282	0.00098713
29180	Uts2	mRNA	173	223	40	286	293	409	67	332	-0.629325	3.25119e-20	1.26997e-18
291813	Cmtm3	mRNA	61	54	61	66	96	72	99	69	-0.494036	4.33291e-05	0.000292264
29184	Cd36	mRNA	3	0	0	17.03	7	3.61	39	5.03	-1.46838	3.48012e-05	0.000239054
29185	Cd37	mRNA	150	119	140	153	198	130	238	194	-0.456011	1.10431e-08	1.40493e-07
291853	Drc7	mRNA	22	9	13	9	25	23	37	17	-0.965087	4.99132e-05	0.000332513
29190	Pdyn	mRNA	344	587	589	327	257	334	452	340	0.396801	7.52772e-15	1.84616e-13
29191	Tac3	mRNA	384	732	899	398	310	386	669	498	0.352619	1.74408e-15	4.49388e-14
292017	Hydin	mRNA	285	217.57	247	139	176	317	417	229	-0.378792	3.89101e-09	5.29987e-08
29202	Epha6	mRNA	98	131	116	92	58	62	63	96	0.626787	9.43349e-09	1.20854e-07
292060	Irf8	mRNA	217	157	174	110	267	158	210	196	-0.357343	1.90951e-06	1.6754e-05
292073	Galns	mRNA	189.52	187.43	153.93	182.53	129.52	105.47	99.02	193.11	0.416018	4.43121e-07	4.37863e-06
292264	Myct1	mRNA	0	2	2	0	5	0	16	3	-2.60554	6.40305e-05	0.000417154
292543	LOC292543	mRNA	7.75	3.02	7.19	7.48	2.1	0	1.63	0	2.74927	2.60258e-05	0.000184589
292816	Zfp507	mRNA	286.83	274.9	296.41	246.96	197.04	253.01	171.92	246.39	0.32723	5.16898e-07	5.03968e-06
29287	Rps19l2	mRNA	0	0	0	14.49	43.31	28.86	42.93	5.7	-3.08007	1.59513e-22	7.37948e-21
292947	Arfgef3	mRNA	715	824	968	582.05	557	593.46	384	764.97	0.405305	1.11482e-24	6.11483e-23
29326	Gpx2	mRNA	45	22	93	41	174	106	38	35	-0.833054	2.66533e-11	4.71776e-10
29335	Oprk1	mRNA	139	193	217	119	94	132.45	139	138	0.387418	4.81282e-06	3.93444e-05
293449	Vwa3a	mRNA	58	66	56	26	64	59	114	50	-0.498988	0.000136913	0.000826168
293625	Pidd1	mRNA	21.94	16.42	0	32.97	19.53	40.48	24.76	39.21	-0.818108	0.000100862	0.000627649
29389	Tnni2	mRNA	0	13	9	11	1	0	0	0	5.02381	3.59752e-09	4.9184e-08
29393	Col1a1	mRNA	329	336	328	667	321	411	1174	259	-0.403765	6.88895e-18	2.15736e-16
293937	Pkd2l1	mRNA	13	22	4	13	21	28	30	30	-1.08833	3.68466e-06	3.08373e-05
29395	Hmgb2	mRNA	149.72	65.17	118.7	6.53	21.43	5.46	74.08	31.16	1.3435	9.00769e-22	3.92907e-20
294043	Sorcs3	mRNA	278	377	372	236	208	242	238	256	0.399414	9.86553e-11	1.62679e-09
294048	Pik3ap1	mRNA	128	103	129	61	165	110	168	125	-0.452652	9.28862e-07	8.63356e-06
294053	Ccnj	mRNA	140	58.9	72.17	104	91.56	0	35.43	0.26	1.53891	7.26819e-29	4.96841e-27
294235	Ier3	mRNA	116	146	116	123	137	137	191	160	-0.339627	8.22443e-05	0.000522258
29434	Rasgrp1	mRNA	230.22	224.11	237.74	206.64	168.12	152.47	150.03	206.11	0.388694	1.03606e-07	1.14479e-06
294343	Zfp280b	mRNA	26.09	17.12	51.74	27.22	0	0	36.18	24.02	1.00047	5.59591e-06	4.50228e-05
294515	Foxo3	mRNA	623	630	732	620	464	460	410	572	0.430154	2.46075e-23	1.2086e-21
294518	Sesn1	mRNA	556	558	580	810	479	460	503	518	0.332799	1.62035e-14	3.8402e-13
294674	Enc1	mRNA	748	790	1044	685	560	599	702	667	0.349388	4.29171e-20	1.64486e-18
294706	Cd180	mRNA	137	118	104	78	170	129	178	134	-0.504121	1.94615e-08	2.38484e-07
29507	Cox7a2	mRNA	11.9	0	0	11.94	23.89	11.94	0	47.53	-1.82655	2.26689e-09	3.19457e-08
29517	Sgk1	mRNA	2208	817	2628	4505	1095	800	1038	1179	1.28412	0	0
295228	Gpatch4	mRNA	1396	1120	1274	2492	1271	1340	954	1155	0.391855	1.34126e-45	1.87572e-43
29559	Grik1	mRNA	167	229.78	303	137	117	157	206	172	0.339395	6.15367e-06	4.92079e-05
296197	Dstnl1	mRNA	63.08	24.76	16.1	40.38	56.73	21.92	44.07	96.11	-0.621121	4.94176e-05	0.000329811
29645	Ptprj	mRNA	579	719	771	616	413	486	603	566	0.356104	2.39657e-17	7.16234e-16
29647	Cask	mRNA	357.47	349.03	362.04	316.35	272.72	229.17	230.62	359.34	0.322415	2.99834e-08	3.56454e-07
296866	Gpr165	mRNA	241	406	459	225	171	216	241	231	0.611199	1.17234e-22	5.52117e-21
296972	Akr1b10	mRNA	112.09	174.19	149.88	171.02	244.21	165.5	151.26	232.8	-0.407178	1.45291e-07	1.56297e-06
297073	Rarres2	mRNA	186	166	189	271	199	316	250	260	-0.356654	1.29167e-07	1.40602e-06
29710	Scn8a	mRNA	1715.04	2682.46	2569.04	1428.03	1226	1729.02	1274.29	2029	0.403102	1.69409e-63	4.25146e-61
29717	Cacna1g	mRNA	1323.92	2332.36	2640.49	914.69	1064.03	1348.5	1638.57	1494.56	0.358351	2.43869e-44	3.21416e-42
298184	Zdhhc21	mRNA	226	205	226	212	167	182	136	200	0.322671	1.11827e-05	8.55038e-05
298186	Ttc39b	mRNA	229	263	285.9	223.99	175	209	166.78	214	0.369026	8.72923e-08	9.77503e-07
298322	Lonrf3	mRNA	382.27	268.57	315.17	535.3	284.09	298.43	219.71	304.65	0.419141	1.63061e-13	3.52688e-12
298521	Grik3	mRNA	135	233	259	109	121	130	85	192	0.458586	2.00012e-08	2.44934e-07
298524	Dnali1	mRNA	97	48	55	67	103	111	114	88	-0.660325	3.45265e-09	4.73448e-08
298801	Clip4	mRNA	265	310	302	232	169	247	207	239	0.342918	1.47573e-07	1.58565e-06
298873	Slc7a15	mRNA	125.97	281.46	317.29	168.27	116.59	170.14	145.7	157.71	0.577005	2.539e-14	5.93296e-13
298890	Cyria	mRNA	302	325	328	451	285.79	261	239.96	303.01	0.347005	2.17859e-09	3.07723e-08
299002	G2e3	mRNA	161.97	145.69	180.33	161.46	114.38	109.38	139.74	113.14	0.425737	8.5657e-07	8.01448e-06
299106	Rpl10l	mRNA	26	16	16	40	57.08	28.96	46.42	52.96	-0.940525	8.68911e-08	9.73606e-07
299312	LOC299312	mRNA	52.68	32.15	37	58.21	50.05	18.7	6.05	33.44	0.713502	3.59761e-05	0.00024611
299713	RGD1561102	mRNA	7	3	3	2	5	7	7	25.58	-1.59202	7.24795e-05	0.000467379
299900	Utp23	mRNA	99	115	93	92	123	149	128	114	-0.385961	5.67977e-05	0.000375237
300242	Krt7	mRNA	14.64	2	2	0	25.84	21.62	19.75	68.89	-2.88877	9.31751e-24	4.71538e-22
300518	Robo4	mRNA	8.27	0	13.53	6.86	3.99	14.39	13.92	39.99	-1.35534	7.40153e-06	5.82457e-05
300653	Tecta	mRNA	321	216	329	253	374	346	347	400	-0.41124	5.39687e-13	1.10966e-11
300663	Ccdc153	mRNA	48	51.5	20.43	44.36	72	52.79	94.46	58.45	-0.777864	2.51719e-08	3.04188e-07
300901	Plod2	mRNA	149	125	77	136	107	81	88	90	0.391497	8.05571e-05	0.000512432
301476	Ikzf2	mRNA	156	104	141	242	118	92	73	126	0.632136	2.2772e-12	4.45709e-11
301521	Cfap65	mRNA	84	101.69	48	28	77.75	82	127	76	-0.491698	2.33448e-05	0.000167126
301887	Cdh12	mRNA	130.99	163.95	175	134.24	89	121	119	102	0.466709	2.37333e-07	2.46902e-06
302248	Nid2	mRNA	152.21	111.21	145.21	103.28	141.53	159.88	199.64	139.06	-0.343011	5.76012e-05	0.000379588
302396	Nexmif	mRNA	263.49	338.69	377.08	212.53	172.4	225.31	228.7	235.91	0.446253	3.30408e-12	6.35828e-11
302424	Eda	mRNA	57	66	112	77	53	48	45	49	0.65749	4.16627e-07	4.13468e-06
302434	MGC114483	mRNA	94.65	82.96	76.7	116.97	120.29	132.47	112.82	146.24	-0.483711	7.42027e-07	7.03256e-06
302473	Slitrk4	mRNA	215	305	224	251	159	233	185	206	0.325103	2.20052e-06	1.90878e-05
302538	Sytl5	mRNA	101	110	100	89	85	74	50	78	0.458368	3.54352e-05	0.000242772
302991	Tekt4	mRNA	41	58	26	102	24	38	47	33	0.65622	1.63495e-05	0.000121166
303113	Jade2	mRNA	502	653	649	620	349	454	442	554	0.409613	4.5323e-20	1.73344e-18
303380	Slfn2	mRNA	144.86	108.87	99.91	126.08	128.93	168.28	193.06	108.65	-0.340752	0.000110297	0.000679891
303476	Abi3	mRNA	145	132	130	114	226	110	138	172	-0.330832	9.39718e-05	0.000589375
303542	Ghdc	mRNA	166	99	80	59	72	312	159	146	-0.79073	5.47616e-19	1.92559e-17
303743	Notum	mRNA	65	84	84	52	91	125	99	89	-0.523975	2.23641e-06	1.93717e-05
304458	Tmem132b	mRNA	257	214	261	449	229	276	151	215	0.418683	6.34449e-11	1.06928e-09
304549	Oasl2	mRNA	124.02	53.66	130.62	154.3	153.83	195.58	225.11	74.92	-0.510013	4.84496e-09	6.44587e-08
304815	Elf3	mRNA	1	0	0	2	6	6	0	9	-2.82794	9.42262e-05	0.000590768
304833	Ro60	mRNA	276	185	233	226	193	180	130	149	0.47618	8.28716e-11	1.37519e-09
304954	Uap1l2	mRNA	0	0	9.71	23.44	17.23	37.36	34.63	0	-1.44894	1.6299e-07	1.73604e-06
305012	Kif26b	mRNA	287	277	306	152	165	197	171	267	0.332742	9.38456e-07	8.71389e-06
305453	Cfap99	mRNA	69.36	76.29	69.77	51.93	98.11	83.46	113	107.42	-0.609012	6.49401e-08	7.37572e-07
305626	Pigg	mRNA	467.07	367.39	467.46	347.1	299.41	232.16	380.17	312.2	0.409494	3.8754e-14	8.89691e-13
305811	Rcor2	mRNA	0	8	0	0	0	10.34	26.73	148.93	-4.55974	8.3093e-44	1.08733e-41
306081	Pcdh20	mRNA	195	203	320	748	139	204	146	145	1.18875	3.7452e-73	1.22522e-70
306330	Klf2	mRNA	378	400	367	348	322	346	705	521	-0.363804	2.62784e-13	5.57199e-12
306344	Arrdc2	mRNA	519	442	665	1368	572	499	506	505	0.503523	6.10724e-35	5.91982e-33
307171	Apbb1ip	mRNA	396	354	392	412	547	403	503	479	-0.33469	8.57704e-12	1.58558e-10
307251	Rnf165	mRNA	81	139	155	67	80	68	76	94	0.454438	1.61237e-05	0.00011959
307415	RGD1309362	mRNA	246.43	160.47	175.86	217.23	284.56	225.73	340.51	136.85	-0.3246	2.10173e-06	1.83263e-05
307428	Tnfaip8	mRNA	160.3	154.65	152.45	181.62	196.02	197.08	235.9	220.02	-0.408117	5.03668e-08	5.82525e-07
307482	Fchsd1	mRNA	176	132	173	160	188	200	209	195	-0.325758	2.02647e-05	0.000147029
307759	Gpt2	mRNA	1155	1015	1071	1340	920	728	905	1023	0.336734	8.60121e-26	4.97079e-24
308322	Zim1	mRNA	104	135	155.46	69	66	79	89	109.96	0.409622	6.02769e-05	0.000395089
308350	Lilrb3	mRNA	32	7	24	28	45	24	68	43	-1.00464	2.538e-08	3.05896e-07
308543	Plekhf1	mRNA	521	334	473	869	500	381	349	426	0.387251	1.13569e-16	3.22571e-15
308794	Cfap161	mRNA	10	8	4	13	14	16	32	20	-1.24885	7.45741e-06	5.86351e-05
308911	Rrp8	mRNA	137	162	162	179	138	127	108	126	0.33845	8.02972e-05	0.000511134
308995	Itgal	mRNA	54	43	66	73	115	64	81	80	-0.54733	6.32989e-06	5.05508e-05
309186	Fermt3	mRNA	145	104	143	134	198	103	197	156	-0.334809	7.05978e-05	0.000456692
309377	Sfrp5	mRNA	1.03	2.17	9.66	60.09	9.44	6.15	10.85	6.04	1.14677	8.79916e-05	0.000555864
309452	Nfkb2	mRNA	166	126	128	137	183	153	202	165	-0.356429	1.24176e-05	9.41603e-05
309611	Vwa7	mRNA	397.6	441.95	195.33	466.69	512.43	569.58	323.04	590.17	-0.430658	1.6075e-18	5.40356e-17
309622	RT1-Bb	mRNA	14	28	64	25	54	58	96	32	-0.894049	5.37569e-09	7.10553e-08
309650	Cpne5	mRNA	769.37	1123.93	1251.97	557.16	558.93	620.03	916.13	736.2	0.366431	1.61886e-24	8.74852e-23
309659	Mdga1	mRNA	667.26	182	126	96	117	122	110	183	0.989229	1.72605e-40	2.04008e-38
309728	Arid5b	mRNA	286	320	324	239	192	196	207	265	0.422285	5.60359e-11	9.52298e-10
309891	Septin10	mRNA	144	97	106	138	174	134	156	151	-0.363183	3.18187e-05	0.000220803
309911	Qrsl1	mRNA	120	150	160	109	144	146	199	179	-0.330144	7.37618e-05	0.000474479
310233	Zfp704	mRNA	331	374	404	244	245	234	210	356	0.352077	2.67147e-09	3.72177e-08
310250	Zfhx4	mRNA	332	484	523	277	272	287	362	314	0.367335	1.31292e-11	2.38618e-10
310341	Fat4	mRNA	239.29	204.94	269.02	102.79	109.6	121.67	132.11	196.04	0.524126	2.42983e-11	4.30925e-10
310483	Mlf1	mRNA	14	7	10	16	21	25	27	18	-0.973787	0.000113478	0.000697157
310519	Slitrk3	mRNA	333	537	516	322.13	250	320.01	394	366.2	0.340182	9.57246e-11	1.58131e-09
310540	Gask1b	mRNA	127.59	61.04	68	90	110.19	107.12	130.87	100.23	-0.392004	0.000136192	0.000822089
310553	Tlr2	mRNA	70	66	72	40	128	74	92	85	-0.632439	5.71138e-08	6.53545e-07
310614	Gatad2b	mRNA	418	459	471	332	312	342	285	363	0.34715	6.00459e-11	1.01386e-09
310655	Cgn	mRNA	144	179	224	84	85	108	112	126	0.529371	3.11889e-09	4.30581e-08
310663	Tnfaip8l2	mRNA	109	109	107	143	189	143	177	124	-0.456279	1.8138e-07	1.92297e-06
310689	Lrrc71	mRNA	36	40	27	25	51	47	80	38	-0.775469	9.52829e-07	8.83839e-06
310694	Fcrl2	mRNA	72	3	8	7	143	71	106	12	-1.90377	1.34444e-34	1.26309e-32
310764	Inka2	mRNA	494.01	502.56	360.3	304.97	556.48	524.86	522.22	589.82	-0.420956	1.96167e-19	7.13051e-18
310811	Palmd	mRNA	166	192	140	131	170	218	191	219	-0.36391	2.05823e-06	1.79813e-05
310849	Sgms2	mRNA	86	78	108	95	140	107	148	109	-0.478225	1.16804e-06	1.06567e-05
311093	Csrnp3	mRNA	102	123.84	139.63	90.02	95	76.05	54	112	0.413875	5.93425e-05	0.000389661
311287	Ano3	mRNA	205	248	320	249	147	188	209	200	0.437439	2.43116e-10	3.86287e-09
311617	Fitm2	mRNA	1219.6	1336.21	1340.28	1340.92	1352.15	1783.35	2110.7	1866.68	-0.462272	4.06562e-70	1.20133e-67
311926	Lrp1b	mRNA	204	243	272	147	137	167	147	184	0.427029	1.20051e-08	1.51992e-07
312381	Ppm1k	mRNA	785.92	445.87	643.84	627.11	485.34	388.86	610.88	428.08	0.366969	3.96777e-17	1.16117e-15
312401	Ndnf	mRNA	159	244	290	143	111	156	192	163	0.406007	9.10144e-08	1.01546e-06
313017	Sfn	mRNA	14.74	7.29	9.09	7.2	26.64	16	27.07	23.23	-1.29878	8.7577e-07	8.17326e-06
313022	Map3k6	mRNA	21	14	27	92	20	24	21	18	0.871165	5.62239e-06	4.51962e-05
313156	Lingo2	mRNA	92	142	158	77	52	82	115	95	0.426598	2.78307e-05	0.000195723
313592	Col8a2	mRNA	13	12	17	33	20	27	81	18	-0.981587	8.58765e-07	8.02273e-06
313595	RGD1563072	mRNA	218.11	331.55	369.9	307.82	218.32	232.71	155.99	269.08	0.465833	1.9459e-13	4.17924e-12
313633	Ephb2	mRNA	194	227.74	228.73	131	132	159.23	151	141.25	0.400926	3.28317e-07	3.3121e-06
313729	Errfi1	mRNA	1230.09	742.76	1074.08	2275.47	817.55	858.59	961.09	805.96	0.60775	1.3232e-84	5.77167e-82
314148	Clec14a	mRNA	95	74	68	76	109	88	149	100	-0.531463	4.77551e-07	4.68348e-06
314397	Rin3	mRNA	421	326	371	744	390	327	323	408	0.34221	1.0701e-11	1.95455e-10
314416	Ak7	mRNA	40	42	21	23	49	57	68	45	-0.818089	2.36641e-07	2.46321e-06
314423	Bcl11b	mRNA	136.7	193.97	239.17	88.29	94.14	108.43	145.92	159.49	0.353019	3.17414e-05	0.000220349
314942	Csmd3	mRNA	204	276	276	159	154	193	160	184	0.384504	1.07078e-07	1.17995e-06
315069	Fam135b	mRNA	298	363	329	258	211	249	157	284	0.449437	7.3172e-13	1.48946e-11
315112	Foxred2	mRNA	114	145	148	82	77	84	91	105	0.433329	1.41582e-05	0.00010639
315311	Slc4a8	mRNA	645	824	851	474	448	579	385	656	0.413514	2.87135e-23	1.40275e-21
315323	Krt4	mRNA	0	3	10	4	0	0	0	1.03	4.02424	5.46509e-05	0.000361445
315337	Hoxc13	mRNA	57	0	1	1	61	89	46	63	-2.15475	7.74176e-32	6.38869e-30
315510	Igsf9b	mRNA	229	271	300	146	162	173	85	223	0.53644	2.09081e-13	4.46951e-12
315840	Myo6	mRNA	3321	2298	2678	2845	1670	2426	1413	2688	0.422259	4.92073e-91	2.31148e-88
316022	Trank1	mRNA	609	881	1024	417	443	592	577	614	0.376358	1.12986e-20	4.57944e-19
316242	Tcte1	mRNA	59.9	86.06	42	41.31	62	77	88.07	106	-0.559359	5.17612e-06	4.20704e-05
316400	Pgap1	mRNA	217	236	306	170	198	155	147	194	0.400161	2.73304e-08	3.27893e-07
316559	Slc19a3	mRNA	162	140	147	403	122	107	98	110	0.942639	3.60787e-30	2.67596e-28
316632	Ndufa10l1	mRNA	0	13.02	656.12	0	0	0	0	14.18	5.5398	3.37523e-158	3.43523e-155
316976	Etfbkmt	mRNA	48	42	20	60	60	81	84	48	-0.703948	4.10139e-07	4.07912e-06
317170	Slc9a7	mRNA	336	510	554	349	239	340	256	385	0.499068	8.84381e-21	3.60843e-19
317253	Nhsl2	mRNA	283.08	270.69	325.19	196.02	201.4	190.73	205.06	234.9	0.348917	1.44552e-07	1.55684e-06
338477	Sla	mRNA	53	26	56	79	34	33	36	31	0.654796	2.96156e-05	0.000207083
353227	Zbtb16	mRNA	608.99	684.65	720.72	2370.6	423.46	721.48	456.46	580.89	0.986139	3.43572e-159	3.7025e-156
360323	RT1-N2	mRNA	17.48	15.25	135.27	16.66	22.86	17.77	30.75	18.3	1.02143	1.35268e-08	1.69385e-07
360504	Hba-a2	mRNA	213.02	259.87	79.99	91.84	251.38	454.52	380.71	489.92	-1.31059	1.79844e-92	8.90469e-90
360622	Igfbp4	mRNA	71.94	39.32	24.17	36.27	61.93	64.33	64.49	146.51	-0.994553	3.97358e-14	9.0995e-13
360733	Rtp4	mRNA	85.37	66.23	65.94	85.57	91.68	106.4	158.75	59.48	-0.478398	9.89855e-06	7.61939e-05
360742	Dgcr2	mRNA	4.06	28.98	4.03	15.07	0	0	0	0	6.68374	1.33778e-13	2.9246e-12
360814	Rasal1	mRNA	141	196	227	59	83	105	164	130	0.349617	6.0363e-05	0.000395511
360817	Med13l	mRNA	782.84	821.77	925.27	632.91	635.67	626.09	545.12	667.43	0.33359	5.23779e-18	1.66591e-16
360893	Taf1a	mRNA	96	76	84	78	96	96	134	108	-0.398429	0.000138712	0.000835921
361046	Parp4	mRNA	726	527	616	759	711	423	476	386	0.376272	1.08331e-18	3.73751e-17
361076	Dgkh	mRNA	329.01	389.27	445.92	258.52	210.19	258.02	311.72	311	0.362512	3.57598e-10	5.54716e-09
361105	Plac9	mRNA	2	5	1	9	8	8	34	3	-1.66104	8.17936e-06	6.40367e-05
361112	Vstm4	mRNA	251	258	222	321	329	321	306	386	-0.371832	3.33925e-10	5.21526e-09
361206	Slc25a48	mRNA	59	52	45	51	14	36	35	29	0.840015	3.34375e-07	3.37135e-06
361262	Heatr1	mRNA	0	61.36	0	0	0	0	0.03	0	10.9775	3.6763e-10	5.67873e-09
361415	Dynlrb2	mRNA	35	39	15	29	54	45	62	40	-0.78899	1.59399e-06	1.42102e-05
361474	Ipcef1	mRNA	99	169	212	105	83	96	134	127	0.390351	1.63633e-05	0.00012122
361597	Fes	mRNA	102	94	70	56	95	126	96	126	-0.480828	4.64834e-06	3.80848e-05
361619	Hbb-b1	mRNA	12.49	32.41	0	17.17	32.08	52.87	19.14	28.29	-1.1133	2.04477e-07	2.15536e-06
361668	Ebf3	mRNA	884.7	1356.88	1654.97	648.19	650.33	758.15	1138.74	833.1	0.406456	1.05239e-35	1.05933e-33
361669	Tcerg1l	mRNA	209	316	358	161	134	212	219	228	0.376147	2.67889e-08	3.21608e-07
361673	Ifitm3	mRNA	424.29	172.53	214.77	292.61	419.68	387.12	585.88	252.88	-0.596159	7.51273e-27	4.54235e-25
361689	Unc93b1	mRNA	226	185	204	200	294	218	292	204	-0.327205	1.37707e-06	1.24337e-05
361744	Tmem252	mRNA	30	20	28	153	22	24	83	23	0.58324	9.10957e-05	0.000573299
361807	Lemd2	mRNA	165.67	140.67	125.33	212.33	169.33	184.33	282.33	260	-0.497004	1.89483e-11	3.38997e-10
361810	Fkbp5	mRNA	521	588	581	2311	375	601	412	450	1.10164	5.80054e-174	7.08439e-171
361888	Srek1ip1	mRNA	6.13	26.3	7.02	12.44	24.04	26.37	22.43	25	-0.935549	0.000108549	0.000670924
361920	Ythdf3	mRNA	1636.3	964.71	1075.23	1067.27	1492.27	1714.13	1585.86	1647	-0.461522	1.81829e-63	4.50151e-61
362020	RGD1309139	mRNA	50.82	80.8	87.55	63.15	34.81	48.83	59.52	46.17	0.555847	3.43547e-05	0.000236342
362263	Ptprt	mRNA	1857.02	2239.86	2723.9	1551.64	1379.91	1633.66	1727.24	1740.69	0.348735	9.84814e-49	1.64016e-46
362418	Irak2	mRNA	145	162	136	312	151	143	126	128	0.441719	3.99815e-08	4.69526e-07
362466	Bicd1	mRNA	354.99	404.71	354.9	280.58	263.03	260.94	212.99	314.67	0.387242	3.95344e-11	6.87163e-10
362489	Runx1t1	mRNA	208.17	297.8	320.01	143	166.51	144.88	203.58	201.42	0.41514	4.27299e-09	5.7687e-08
362597	Eva1b	mRNA	155	147	145	137	251	219	212	191	-0.600595	3.66012e-15	9.1854e-14
362606	Sync	mRNA	378.58	280.8	277.13	267.28	360.64	452.45	391.55	471.38	-0.498037	3.578e-20	1.39466e-18
362867	Mybpc1	mRNA	41	23	35	22	85	73	29	27	-0.843185	1.58406e-07	1.69213e-06
362930	Ptp4a3	mRNA	928	910	988	1690	832	884	819	840	0.399576	1.96465e-34	1.8178e-32
363069	Ppcdc	mRNA	161.62	237.89	233.01	140.73	109.84	111.72	65.63	137.61	0.84357	4.23e-23	2.04469e-21
363071	Stra6	mRNA	28	70	33	36	30	75	60	79	-0.567615	7.72655e-05	0.000494413
363144	Cdhr4	mRNA	74	101	50	15	80	104	164	75	-0.838205	2.24393e-13	4.78566e-12
363331	Plin4	mRNA	198	107	139	547	181	119	96	159	0.815816	1.29556e-27	8.15622e-26
363782	Cfap44	mRNA	54	32	16	21	55	48	77	64	-1.0088	7.61599e-11	1.27072e-09
364069	Hlx	mRNA	33	35	30	33	54	52	70	61	-0.875902	1.20714e-08	1.52621e-07
364205	Fbxo48	mRNA	1982.47	1069.77	920.47	1920.54	2441.26	2328.26	2483.07	1914.92	-0.658048	2.53656e-168	2.90436e-165
364206	Plek	mRNA	136	113	116	112	197	101	194	127	-0.396532	5.88388e-06	4.71947e-05
364476	Hs6st3	mRNA	77	160	174	87	58	89	76	127	0.488209	1.01189e-06	9.32022e-06
364630	Thsd1	mRNA	132.8	177.55	142.2	111.1	159.21	173.88	213.27	202.46	-0.430401	7.57472e-08	8.54488e-07
364634	Csmd1	mRNA	353	349	430	240	230	269	263	276	0.381892	1.00501e-10	1.65574e-09
364706	Foxc1	mRNA	120	90	90	119	103	144	196.01	119	-0.444227	1.61571e-06	1.43898e-05
364823	Klhl14	mRNA	98	153.85	149.02	70	78	61.01	125.09	70.96	0.470328	4.34107e-06	3.58559e-05
365476	Cfap43	mRNA	56	39	24	28	54	49	70	52	-0.63469	2.72621e-05	0.000191945
365823	Fstl5	mRNA	610	935	939	651	492	609	678	641	0.352877	1.11202e-19	4.12393e-18
365864	Tuft1	mRNA	58	53	94	39	36	61	31	34	0.570306	8.10072e-05	0.00051476
366126	Spi1	mRNA	158	140	153	105	232	135	215	174	-0.463883	7.06824e-09	9.22952e-08
366214	Nkx2-2	mRNA	438	377	420	297	629	490	451	467	-0.431611	6.02671e-19	2.11108e-17
366274	Ntsr1	mRNA	107	202	220	123	95	138	133	123	0.394456	4.34512e-06	3.58732e-05
366957	Rac2	mRNA	100	76	100	124	193	114	162	96	-0.518832	2.94593e-08	3.51134e-07
366988	Bin2	mRNA	308	247	285	254	502	283	349	369	-0.478814	4.31881e-17	1.25988e-15
367033	Zfp26	mRNA	220	168.06	220.03	201.16	157.05	134.19	160.01	170.13	0.360528	2.53089e-06	2.17476e-05
367160	Cpne4	mRNA	305	383	542	301	194	285	351	329	0.381012	9.36695e-12	1.71774e-10
367176	RGD1565653	mRNA	32.57	1.07	0	3.18	26.78	25.87	37.73	24.59	-1.66328	4.83952e-11	8.28598e-10
378947	Bst2	mRNA	275	155	129	162	256	197	304	151	-0.353275	8.42129e-07	7.89954e-06
399684	Vkorc1l1	mRNA	166.63	0	100.59	327.9	475.01	0	367.3	183.85	-0.806585	2.15444e-28	1.44576e-26
406163	Gpsm3	mRNA	179	138	169	139	224	196	215	199	-0.436773	8.80792e-09	1.13315e-07
406227	Krt72	mRNA	7.98	0	0	0	12.54	7.81	6	37.18	-3.01356	2.40439e-12	4.68103e-11
406228	Krt2	mRNA	92	173	90	46	155	106	136	191.97	-0.575174	5.13961e-10	7.78807e-09
407759	Kb23	mRNA	6.61	0	0	0	17.25	8.88	4.03	96.56	-4.28143	1.48223e-29	1.04844e-27
414784	RT1-T24-4	mRNA	592.41	430.32	216.92	435.26	545.03	556.18	659.8	445.15	-0.418035	2.62437e-19	9.46425e-18
414788	RT1-T24-3	mRNA	315.27	212.81	160.41	270.04	284.99	335.55	389.85	200.37	-0.357599	8.77598e-09	1.12984e-07
445415	S100a11	mRNA	56	41	38	87	65	66	155	38	-0.566016	5.53846e-06	4.46194e-05
497840	Cps1	mRNA	2	2	2	3	7	10	4	14	-1.97994	4.34495e-05	0.000292968
497918	Smcr8	mRNA	275	320	355	268	199	265	188	289	0.351666	1.70308e-08	2.10246e-07
497942	Cxcl16	mRNA	118	88	78	103	140	88	165	101	-0.372759	0.000133253	0.000805941
498002	RGD1561590	mRNA	512.16	471.65	382.37	555.48	678.39	501.11	652.62	592.28	-0.355856	5.34391e-16	1.41885e-14
498072	Hmgb2l1	mRNA	11.82	70.29	23.52	173.47	160.4	173.3	83.92	131.84	-0.997814	3.73536e-22	1.68551e-20
498143	RGD1565131	mRNA	18.9	7.02	23.13	4.43	26.69	4.16	40.13	72.22	-1.44154	3.85284e-11	6.7095e-10
498159	Spry3	mRNA	214.26	237.58	231.21	185.97	146.94	131.18	222.49	157.9	0.379602	3.09851e-07	3.14486e-06
498167	RGD1566138	mRNA	82	0	0	0	0	0	0	0	7.33697	9.05526e-20	3.38556e-18
498206	Tnfrsf11a	mRNA	505	533	712	1326	559	540	442	522	0.55573	1.50697e-42	1.89093e-40
498270	Ccdc190	mRNA	20	25	18	20	31	27	65	24	-0.845215	1.33714e-05	0.000101058
498276	LOC498276	mRNA	76.02	0	21.05	114.53	81.5	13.84	20.74	0	0.845639	2.11618e-07	2.22551e-06
498278	Cfap126	mRNA	39	59	15	30	57	54	122	71	-1.10864	4.28871e-15	1.06607e-13
498335	Cxcl13	mRNA	8	2	5	12	16	4	41	2	-1.24297	9.13459e-05	0.000574084
498523	RGD1565170	mRNA	4.34	0	0	5.56	12.17	8.99	2.4	11.1	-1.82835	0.000114819	0.000703977
498683	RGD1564382	mRNA	33.74	67.42	74.79	17.03	71.06	91.82	25.51	94.1	-0.57033	1.94236e-05	0.000141375
498795	Ccdc3	mRNA	46	20	24	25	34	31	86	38	-0.737334	1.14376e-05	8.73437e-05
498846	Pcdhga2	mRNA	175.03	269.77	319.27	176.73	168.09	128.08	191.21	185.45	0.463064	1.53429e-10	2.47649e-09
498898	Dok6	mRNA	160	195	180	161	118	132	101	187	0.3509	2.09516e-05	0.000151533
498949	Phlpp2	mRNA	393	495	441	257	265	315	237	389	0.374581	8.62419e-12	1.59109e-10
499068	Zfp583	mRNA	155.6	195.69	230.99	196.55	122.73	134.85	170.04	143.39	0.427211	6.3975e-08	7.27512e-07
499171	Klf13	mRNA	187	186	204	214	158	115	128	208	0.356654	4.11752e-06	3.4148e-05
499229	Gvin1	mRNA	2	3	7.09	5	25	6	10.83	8.89	-1.58998	2.35226e-05	0.000168268
499241	Scube2	mRNA	189	152	160	80	101	109	124	94	0.420346	4.20959e-06	3.488e-05
499539	Lmbrd2	mRNA	299.57	295.42	333.52	272.11	219.68	195.04	170.01	262.02	0.48319	5.47067e-14	1.23732e-12
499586	Tmem212	mRNA	29	26	8	16	30	32	62	34	-1.02058	1.24125e-07	1.35436e-06
499587	Slc7a14	mRNA	325	451	360	282	259	309	175	335	0.374919	1.03695e-10	1.70375e-09
499593	Sox2	mRNA	1079	1107.02	1007	626.01	1203	1189.02	1283	1213	-0.376626	6.95792e-34	6.34175e-32
499668	Lingo4	mRNA	174.92	311	277.97	167	140	210	112	237	0.392737	4.57234e-08	5.33197e-07
499856	Fibin	mRNA	371	263	356	917	407	380	342	306	0.389672	7.95934e-15	1.9494e-13
499874	Mga	mRNA	698	608	737	577	539	497	375	547	0.399604	1.1479e-20	4.64229e-19
499877	Ubr1	mRNA	554	616	661	545	439	455	415	534	0.345897	8.79591e-15	2.14569e-13
499931	Sla2	mRNA	10.43	19.63	34.18	16.83	22.81	2.11	2.11	11.43	1.05523	0.000111169	0.000684809
499980	Ccdc146	mRNA	44	29	19	14	39	48	56	50	-0.885118	2.12108e-07	2.22938e-06
500105	Cntnap2	mRNA	1129	1798	1821	1014	914	1115	1163	1243	0.357054	1.52221e-35	1.51559e-33
500221	Eva1a	mRNA	275	206	205	353	202	199	207	193	0.35474	1.5079e-07	1.61832e-06
500352	Smco3	mRNA	10.86	5.01	15	24	8.53	3.93	6.9	0	1.48236	3.35529e-05	0.000231521
500364	Sspn	mRNA	1146.24	376.73	516.81	524.97	557.6	367.9	518.09	491.15	0.386097	4.19326e-19	1.48589e-17
500392	Mcmdc2	mRNA	102.61	101.9	99.12	88.32	73.14	56.47	69.88	86.46	0.434325	9.81815e-05	0.000612422
500448	RGD1560723	mRNA	22.62	8.02	3.83	3.94	24.02	35.17	41.2	47.51	-1.96565	6.05134e-17	1.7569e-15
500590	Tnfrsf9	mRNA	52	46	34	87	90	87	67	78	-0.576711	4.09935e-06	3.40127e-05
500640	Ccdc71l	mRNA	182	175	212	346	173	158	205	155	0.384504	1.07078e-07	1.17995e-06
501005	Cplx3	mRNA	23.12	25.08	21.22	9.5	8.63	6.7	8.52	7.41	1.31549	5.51695e-06	4.45245e-05
501033	Minar1	mRNA	184	192	229	259	110	148	152	184	0.519987	9.00377e-12	1.65778e-10
501105	Ankrd66	mRNA	30	38	23	32	44	49	60	46	-0.714692	1.17854e-05	8.96632e-05
501668	Dmrtc1a	mRNA	47.68	6.71	46.49	9.28	0	2.45	7.18	16.36	2.06299	1.39917e-13	3.04427e-12
502300	Rnf225	mRNA	4579.41	1842.05	1873.03	3153.77	5349.31	5752.31	5365.53	4825.61	-0.915816	0	0
502348	Stard5	mRNA	163	177	201	216	287	224	218	224	-0.352765	4.67785e-07	4.60496e-06
502684	LOC502684	mRNA	17	32	17	14	24	40	47	32	-0.858525	1.34982e-05	0.00010189
502992	Ldlrad2	mRNA	2	3	1	1	9	7	15	2	-2.25762	1.604e-05	0.000119113
50564	Gjd2	mRNA	94	170	153	109	73	109	105	103	0.411007	1.80894e-05	0.000132666
50577	Galr1	mRNA	66	119	129	46	49	74	39	68	0.625781	1.96181e-07	2.07149e-06
50592	Gria1	mRNA	434	619	697.67	338	339	349	406	479	0.388484	5.20056e-16	1.38279e-14
50683	Sftpc	mRNA	0	16	20	23	1	1	0	0	4.86206	4.02041e-15	1.00209e-13
50872	Hpcal4	mRNA	1735	2259	2623	1382	1259	1320	1623	1690	0.420481	2.20517e-65	5.94099e-63
54234	Cacna1e	mRNA	2061.35	2925.64	3205.23	1417.76	1454.58	1695.71	1982.85	2007.99	0.407799	5.82902e-74	1.94159e-71
54246	Cyp2f4	mRNA	0	5	6	9	0	0	1	0	4.30135	8.25781e-06	6.46232e-05
54249	Cfd	mRNA	7	4	10	19	19	19	29	13	-1.02058	0.00016837	0.000997908
54305	Sstr2	mRNA	110	209	231	75	96	99	150	133	0.366264	2.70474e-05	0.000190874
54349	Aox1	mRNA	299	244	279	294	569	321	468	462	-0.726183	3.6727e-41	4.42657e-39
553129	Pcdhga1	mRNA	88.45	122.9	76.02	84.19	28.8	63.49	81.81	84.21	0.50391	1.37868e-05	0.000103684
554353	Gpr34	mRNA	256	174	207	140	289	213	266	210	-0.352501	3.37561e-07	3.39973e-06
56646	Lgals1	mRNA	1377	1403	702	2184	2151	2364	1187	1710	-0.408114	2.40876e-58	5.13122e-56
56768	Pclo	mRNA	1427.23	1790.96	1874.15	1097.94	1105.94	1247.63	781.27	1489.77	0.400091	1.15128e-46	1.71475e-44
56817	Kcnip2	mRNA	409.87	490.21	523.63	261.87	218.53	273.77	306.29	358.88	0.521689	1.21861e-21	5.29025e-20
56827	Cacna1i	mRNA	559	885.99	1010	442.47	468.43	570	524.36	664	0.359242	7.03611e-19	2.45527e-17
57302	Cnr2	mRNA	164.78	163.6	209.31	151.77	134.27	130.03	141.26	135.43	0.329283	6.64855e-05	0.000432226
58813	Nt5e	mRNA	225.55	213.01	292.15	292.06	217.74	178.16	183.09	224.77	0.327063	1.38607e-06	1.25026e-05
58814	Tmod2	mRNA	1916	1875	1744	1933	1382	1422	1163	1780	0.357331	1.28025e-45	1.81816e-43
58961	Azin1	mRNA	2339	1740	2044	3307	1689	1692	1538	1656	0.499685	9.78298e-105	5.78143e-102
59115	Ninj2	mRNA	373	403	412	487	649	486	551	519	-0.417199	3.11953e-19	1.11621e-17
59300	Nat8f1	mRNA	59.04	52.1	110.19	48.62	108.71	67.45	128.56	70.89	-0.497125	1.37396e-05	0.000103499
59318	Negr1	mRNA	508	652	800	483	389	482	465	553	0.35045	1.70155e-15	4.39667e-14
59322	Cnksr2	mRNA	195.92	254.05	320.65	192.15	155.33	184.16	196.34	203.31	0.360762	2.81058e-07	2.8862e-06
60393	Sult1d1	mRNA	226	75	116	175	148	103	104	91	0.387972	1.62854e-05	0.00012074
60414	Rhd	mRNA	13	3	5	7	12	21	22	14	-1.32175	1.74659e-05	0.000128556
60565	Syt6	mRNA	142	202	234	126	94	129	163	167	0.327714	6.01429e-05	0.000394352
60589	Epha8	mRNA	143	281	310	101	99	101	187	171	0.560929	6.81917e-13	1.39117e-11
60590	Grm8	mRNA	113	149	159	121	82	117	113	100	0.375067	6.43594e-05	0.000419148
60628	Cxcr4	mRNA	72	67	50	27	87	86	81	100	-0.7333	2.2768e-09	3.20607e-08
60666	Gpd1	mRNA	7691	5682	7082	14067	5267.58	7353	4345.98	5770	0.581918	0	0
619558	Retreg1	mRNA	0	0	0	2.94	0	0.07	200.59	0	-6.11337	2.38298e-49	4.00516e-47
63887	Nmu	mRNA	69	90	97	64	34	57	73	63	0.474798	0.000133184	0.000805788
64030	Kit	mRNA	165	218	251	103	114	127	193	121	0.388595	1.45903e-06	1.31026e-05
64169	Necab1	mRNA	144	239	296	142	122	131	189	178	0.384532	4.79718e-07	4.70221e-06
64199	Gng11	mRNA	209.85	199.62	119.48	242.98	235.85	247.87	244.71	249.56	-0.361931	1.7038e-07	1.81159e-06
64345	Hif3a	mRNA	32	32	42	98	10	19	13	8	2.00799	4.56786e-23	2.20219e-21
64347	Sncg	mRNA	3811	4786	4141	5373	6026	5287	4951	6128	-0.326699	2.43385e-114	1.59243e-111
64443	Gpr88	mRNA	142.61	173.19	207.5	164.07	106.89	124.02	179.73	131.38	0.322159	9.57463e-05	0.000599068
64826	Foxq1	mRNA	48	76	55	64	60	79	109	92	-0.50516	2.69572e-05	0.000190311
64846	Slc13a3	mRNA	1964	779	966	890	938	765	1046	859	0.329539	6.41267e-25	3.56e-23
65025	Rims3	mRNA	271	417	499	271	213	273	272	361	0.361199	2.49599e-10	3.95901e-09
65037	Mertk	mRNA	236	190	252	387	229	184	150	234	0.39762	3.30925e-09	4.54804e-08
65047	Slit1	mRNA	722	929	1032	430	422	479	507	839	0.449724	8.68692e-30	6.21658e-28
65193	Nkx6-1	mRNA	165	86	29	93	129	147	86	127	-0.41124	3.10664e-05	0.00021632
65194	Slc29a2	mRNA	124.09	171.38	169.27	161.41	106.71	100.79	104.91	119.28	0.515931	8.11924e-09	1.05194e-07
652928	Rbm12	mRNA	397.1	482.39	417.51	408.98	169.99	371.32	386.85	339.37	0.407999	1.73953e-14	4.11202e-13
66012	Gucy1a2	mRNA	99	158	120	109	77	75	64	123	0.499089	8.29119e-07	7.78547e-06
66030	Synpr	mRNA	448	696	880	473	316	390	670	454	0.427771	3.19874e-22	1.44694e-20
679629	Smtnl2	mRNA	164	149	133	160	255	169	161	164	-0.32623	3.32031e-05	0.000229367
680835	Cul7	mRNA	760.24	1053	925.91	567.35	592.31	719.4	437.99	855.56	0.323296	9.09855e-18	2.81563e-16
680866	Tmem45al	mRNA	0	5	10	0	0	0	0	0	4.88631	7.39058e-05	0.000475239
681031	Snrpg	mRNA	9.62	8.89	9.57	176.19	177.68	176.88	7.29	0	-0.845496	8.31539e-12	1.54188e-10
681126	Krt83	mRNA	1.76	0	0	0	0	0	6.77	23.95	-4.14611	3.57827e-08	4.22656e-07
682076	Mnx1	mRNA	32	25	8	37	41	53	16	51	-0.679073	0.000164683	0.000978908
683720	Krt79	mRNA	11.84	4	4	4.34	17.86	10.44	9.53	35.56	-1.62235	2.45629e-07	2.5452e-06
684111	E2f2	mRNA	480.11	252.9	226.59	258.63	504.1	605.65	518.31	524.31	-0.841721	6.78072e-62	1.57244e-59
684871	LOC684871	mRNA	41.55	20	27	74	15	5.55	37	20	1.0471	5.38485e-08	6.20443e-07
684969	Potef	mRNA	0	0	8.89	18.27	0	0	0	0	5.74283	6.53904e-08	7.41766e-07
685504	Clgn	mRNA	170	194	149	168	171	266	197	212	-0.333584	6.65063e-06	5.29507e-05
685590	LOC685590	mRNA	57.49	31.51	10.41	17.38	0	5.18	18.12	30.51	1.09739	1.67622e-06	1.48853e-05
686539	Islr	mRNA	54	34	38	99	60	51	197	35	-0.628865	2.78562e-07	2.86377e-06
687064	Col25a1	mRNA	138	211	270	86	94	114	92	158	0.601694	2.06488e-12	4.04585e-11
687679	LOC687679	mRNA	179.38	160.11	163.43	67.81	4.32	13.12	200.71	187	0.473771	3.5411e-07	3.55663e-06
688320	LOC688320	mRNA	0	6.54	8	7.91	0	0	0	0	5.46806	9.31214e-07	8.65103e-06
688459	LOC688459	mRNA	17	27	29	15	49	55	27	32	-0.909878	1.058e-06	9.71069e-06
688583	LOC688583	mRNA	0	0	0	0	0	0	39.12	0	-6.31042	7.79344e-11	1.29914e-09
688730	Gpr84	mRNA	100	62	76	54	128	75	112	100	-0.527725	1.39342e-06	1.25566e-05
688790	Pmp2	mRNA	65	42	84	187	70	61	62	41	0.671296	1.39303e-08	1.742e-07
689064	Hbb-bs	mRNA	26.64	44	4.26	14.07	41.02	52.4	48.01	64.95	-1.23449	1.87586e-12	3.69923e-11
689130	LOC689130	mRNA	66.01	32.15	47.78	103.95	111.02	83.52	118.15	151.44	-0.913817	1.3901e-16	3.91192e-15
689268	LOC689268	mRNA	172.29	231.14	286.47	165.12	209.12	183.88	57.61	155.92	0.474798	4.23741e-10	6.49618e-09
689415	Mt2A	mRNA	760.5	566.73	789.11	2740.28	1120.61	847.93	881.75	817.26	0.384554	1.78284e-34	1.65795e-32
689479	LOC689479	mRNA	145.28	93.56	190.97	62.44	10.3	103.42	72.53	140.84	0.569122	2.30049e-08	2.79847e-07
689582	Kdm4d	mRNA	51.74	0	52.34	0	0	63.67	74	61.55	-0.957251	1.80087e-08	2.21869e-07
689926	Smim5	mRNA	317	225	243	297	470	322	274	280	-0.33556	1.1063e-08	1.40551e-07
690115	Dnhd1	mRNA	303.34	290.71	347.37	223.25	214.9	253.18	221.22	214.1	0.345903	5.63764e-08	6.46722e-07
690136	Zfp939	mRNA	50.31	68.88	41.74	38.05	22.68	20.61	39.9	30.54	0.786429	2.27112e-06	1.96351e-05
690468	LOC690468	mRNA	183.33	69	26.29	151.8	77.63	64.76	78.59	41.4	0.693506	4.62822e-10	7.03644e-09
690492	Cd33	mRNA	118.94	99	115	113.66	190	117	186.95	130.95	-0.505224	1.2586e-08	1.58581e-07
690538	Scai	mRNA	214	191	231	161	158	138	122	153	0.460507	4.56115e-09	6.11268e-08
690746	Spag17	mRNA	8	24.99	9	6	13.31	21	44.51	14.12	-0.974147	9.54295e-05	0.000597699
690865	Pcdh15	mRNA	129.23	129.37	151.34	99.81	100.93	91.9	73	114.68	0.401274	3.66697e-05	0.000250294
690955	Pirb	mRNA	0	0	0	0	15.29	0	36.17	0	-6.70596	1.33497e-13	2.92195e-12
691069	Pkd1l2	mRNA	52	66	28	33	91	83	105	126	-1.19854	5.45311e-22	2.42478e-20
691221	Faxdc2	mRNA	173	192	117	299	326	114	615	108	-0.595038	2.18208e-19	7.90034e-18
691312	Cyp4f37	mRNA	0	3.36	0	2.29	11.04	9.56	6.59	0	-2.28733	7.91573e-05	0.000505283
691499	Zfp469	mRNA	150	89	131	142	116	74	54	122	0.463719	2.25746e-06	1.95262e-05
691543	Katnbl1	mRNA	40.94	34.44	26.44	26.92	18.68	0	8.68	0	2.21374	6.32975e-17	1.83483e-15
691644	Myh2	mRNA	5.68	19.79	16.35	24.03	0	3.87	1.42	3.27	2.92292	2.94006e-12	5.68164e-11
691657	Crip1	mRNA	56	60	67	120	87	106	112	112	-0.481311	8.67851e-06	6.74259e-05
691842	Maz	mRNA	2365	1944	1767	1303	2515.91	2266	2387.9	2303.01	-0.38095	2.32442e-65	6.17151e-63
691931	Fam241a	mRNA	46	41	42	22	52	54	71	48	-0.595958	7.31744e-05	0.000471363
78960	Prx	mRNA	64	52	88	226	54	50	92	47	0.802799	1.50047e-12	2.9879e-11
79112	Pigm	mRNA	34.58	30.58	129.32	51.7	29.87	60.17	0	21.91	1.11628	1.79571e-12	3.5488e-11
79129	Cyba	mRNA	173	129	127	159	225	156	260	159	-0.464765	2.43434e-09	3.41478e-08
79237	Hhex	mRNA	62	55	53	47	66	61	90	87	-0.506958	6.8283e-05	0.000443283
81514	Lrrn3	mRNA	363	407	478	504	294	295	354	374	0.391166	7.87274e-14	1.75674e-12
81645	Chrm2	mRNA	243	369	278	202	176	218	194	273	0.322306	8.69003e-07	8.11424e-06
81672	Grm7	mRNA	409.95	659.54	739.21	394.28	311.67	408.36	487.53	439.97	0.39857	1.50406e-17	4.57713e-16
81680	Lifr	mRNA	681.88	690	707	767	511	600	361	674	0.386643	4.46906e-21	1.87353e-19
81707	Mmp14	mRNA	344	294	297	190	420	317	415	410	-0.494051	1.18e-18	4.04824e-17
81781	Snrpn	mRNA	238.07	502.58	264.78	142.78	153.27	274.01	242.49	155.78	0.455377	3.29876e-12	6.35472e-11
83476	Ccn1	mRNA	40	25	12	26	49	45	111	42	-1.28245	2.04596e-15	5.24224e-14
83498	Hnrnpab	mRNA	1547.89	2242	1632.17	1606.51	2290.99	2330.9	2244.29	2162.99	-0.381944	1.11276e-62	2.64749e-60
83578	Pdxk	mRNA	243.26	281.06	270.11	244.51	172.46	189.87	154.49	281.35	0.359763	1.03105e-07	1.14063e-06
83684	Tpbg	mRNA	382	782	841	344	295	413	572	486	0.39098	5.2139e-18	1.66119e-16
83731	Kcnma1	mRNA	362	449.22	404	313.69	247.63	304	234	398.51	0.348082	3.89481e-10	5.99101e-09
83783	Sult1a1	mRNA	123	68	101	306	79	72	115	96	0.703574	1.01908e-13	2.25477e-12
84032	Col3a1	mRNA	191	116	183	408	223	241	824	141	-0.6908	4.3819e-30	3.21106e-28
84347	Cacng2	mRNA	1702.38	1715	1392.67	1506.85	1602.46	1941.07	2081.68	2373.77	-0.361181	2.22648e-50	3.84803e-48
84352	Col1a2	mRNA	161.98	108.24	135.24	256.96	176.98	194.48	456.69	120.48	-0.538681	1.05565e-13	2.32725e-12
84408	Cdh8	mRNA	327.02	417	489	287.43	202	291	380	283.05	0.374713	2.27196e-11	4.04099e-10
84481	Arid4b	mRNA	621.88	472.69	786.44	603.23	412.74	495.78	365.68	634.79	0.359413	2.02067e-16	5.64308e-15
84573	Otof	mRNA	539	924	1119	315	370	466	650	536	0.498195	3.03191e-33	2.69634e-31
84597	Fut9	mRNA	148	135	137	107	85	86	55	108	0.637373	1.56574e-10	2.52503e-09
84607	Socs2	mRNA	123.35	161.41	138.69	155.06	220.61	158.49	161.09	173.34	-0.323214	5.93219e-05	0.000389665
85247	S100a6	mRNA	32	24	37	101	72	48	104	113	-0.817274	1.50035e-10	2.42598e-09
85266	Prss12	mRNA	128	184	201	148	123	120	66	166	0.456141	1.20817e-07	1.32141e-06
85435	Smad9	mRNA	0	244.79	244.41	105.75	227.12	115.71	102.38	12.8	0.356808	6.45086e-05	0.000419971
85497	Klf15	mRNA	649	419	512	795	460	383	396	412	0.504006	4.13611e-28	2.71589e-26
89813	Pdk4	mRNA	411	130	363	752	168	162	93	152	1.50549	1.45767e-117	9.89056e-115
89826	Rpe65	mRNA	183.54	56.21	97.48	191.43	90.03	97.58	78.32	73.5	0.618644	4.35342e-10	6.65731e-09
89868	Sec16b	mRNA	171.23	126.8	81.46	104.11	158.27	201.38	214.34	241.48	-0.774399	1.87637e-21	8.01283e-20
94174	Tinagl1	mRNA	238	221	189	431	149	170	227	164	0.583222	2.74041e-17	8.11056e-16

## Sheet: Suppl. Table 3
Suppl. Table 3 The DEGs of GO analysis
The top 10 mostly enriched biological processes of up-regulated DEGs
GO_P Term ID	GO_P Term Desc	GO_P Term Level1	GO_P Term Level2	Term Candidate Gene Num	Total Candidate Gene Num	Term Gene Num	Total Gene Num	Rich Ratio	P value	Q value
GO:0007268	chemical synaptic transmission	biological_process	cellular process	23	337	205	17989	0.112195	6.40205e-12	1.24136e-08
GO:0019233	sensory perception of pain	biological_process	multicellular organismal process	13	337	85	17989	0.152941	6.10536e-09	5.91914e-06
GO:0007626	locomotory behavior	biological_process	behavior	12	337	114	17989	0.105263	1.53433e-06	0.000895778
GO:0042391	regulation of membrane potential	biological_process	biological regulation	12	337	116	17989	0.103448	1.84792e-06	0.000895778
GO:0035235	ionotropic glutamate receptor signaling pathway	biological_process	biological regulation	6	337	26	17989	0.230769	6.93558e-06	0.00268962
GO:0007218	neuropeptide signaling pathway	biological_process	biological regulation	10	337	107	17989	0.0934579	3.27814e-05	0.0105939
GO:0006811	ion transport	biological_process	localization	24	337	531	17989	0.0451977	6.83329e-05	0.0146747
GO:0007263	nitric oxide mediated signal transduction	biological_process	biological regulation	4	337	13	17989	0.307692	7.56818e-05	0.0146747
GO:0043278	response to morphine	biological_process	response to stimulus	7	337	54	17989	0.12963	6.32588e-05	0.0146747
GO:0045163	clustering of voltage-gated potassium channels	biological_process	cellular component organization or biogenesis	3	337	5	17989	0.6	6.33707e-05	0.0146747
chemical synaptic transmission
Gene ID	Gene Symbol	Type	GO_P Term	GO_P Term Level1	GO_P Term Level2	log2 (SMIR_SCDH / Con_SCDH)	Pvalue(SMIR_SCDH / Con_SCDH)	Qvalue (SMIR_SCDH / Con_SCDH)
103694905	LOC103694905	mRNA	GO:0006939///smooth muscle contraction+++GO:0007165///signal transduction+++GO:0007186///G protein-coupled receptor signaling pathway+++GO:0007187///G protein-coupled receptor signaling pathway, coupled to cyclic nucleotide second messenger+++GO:0007192///adenylate cyclase-activating serotonin receptor signaling pathway+++GO:0007210///serotonin receptor signaling pathway+++GO:0007268///chemical s…	biological_process	multicellular organismal process+++regulation of biological process+++response to stimulus+++signaling+++cellular process+++biological regulation+++behavior+++rhythmic process+++developmental process+++positive regulation of biological process+++cellular component organization or biogenesis+++negative regulation of biological process+++localization	1.09459	1.34428e-16	3.78881e-15
140675	Gabra4	mRNA	GO:0006811///ion transport+++GO:0006821///chloride transport+++GO:0007165///signal transduction+++GO:0007214///gamma-aminobutyric acid signaling pathway+++GO:0007268///chemical synaptic transmission+++GO:0007417///central nervous system development+++GO:0034220///ion transmembrane transport+++GO:0042391///regulation of membrane potential+++GO:0050877///nervous system process+++GO:0051932///synapt…	biological_process	localization+++regulation of biological process+++response to stimulus+++signaling+++cellular process+++biological regulation+++developmental process+++multicellular organismal process	0.396447	1.13135e-06	1.03528e-05
24380	Gad2	mRNA	GO:0006540///glutamate decarboxylation to succinate+++GO:0007268///chemical synaptic transmission+++GO:0019752///carboxylic acid metabolic process+++GO:0042136///neurotransmitter biosynthetic process+++GO:0042493///response to drug	biological_process	metabolic process+++cellular process+++signaling+++biological regulation+++response to stimulus	0.514204	1.14607e-24	6.26745e-23
24409	Grin2a	mRNA	GO:0001508///action potential+++GO:0001964///startle response+++GO:0001975///response to amphetamine+++GO:0006811///ion transport+++GO:0006816///calcium ion transport+++GO:0007268///chemical synaptic transmission+++GO:0007611///learning or memory+++GO:0007612///learning+++GO:0007613///memory+++GO:0008542///visual learning+++GO:0009416///response to light stimulus+++GO:0009611///response to woundi…	biological_process	biological regulation+++response to stimulus+++multicellular organismal process+++localization+++signaling+++cellular process+++behavior+++regulation of biological process+++positive regulation of biological process+++developmental process+++locomotion+++metabolic process+++negative regulation of biological process+++rhythmic process+++multi-organism process+++cellular component organization or b…	0.628588	7.28339e-30	5.25322e-28
24418	Grm5	mRNA	GO:0000185///activation of MAPKKK activity+++GO:0001932///regulation of protein phosphorylation+++GO:0002029///desensitization of G protein-coupled receptor signaling pathway+++GO:0006355///regulation of transcription, DNA-templated+++GO:0006448///regulation of translational elongation+++GO:0006468///protein phosphorylation+++GO:0007165///signal transduction+++GO:0007186///G protein-coupled recep…	biological_process	metabolic process+++regulation of biological process+++response to stimulus+++signaling+++positive regulation of biological process+++cellular process+++biological regulation+++negative regulation of biological process+++behavior+++multicellular organismal process+++locomotion+++developmental process+++cellular component organization or biogenesis+++localization	0.479358	9.33452e-31	7.15516e-29
24922	Gabrb3	mRNA	GO:0006811///ion transport+++GO:0006821///chloride transport+++GO:0007165///signal transduction+++GO:0007214///gamma-aminobutyric acid signaling pathway+++GO:0007268///chemical synaptic transmission+++GO:0007605///sensory perception of sound+++GO:0034220///ion transmembrane transport+++GO:0042391///regulation of membrane potential+++GO:0043523///regulation of neuron apoptotic process+++GO:0043524…	biological_process	localization+++regulation of biological process+++response to stimulus+++signaling+++cellular process+++biological regulation+++multicellular organismal process+++negative regulation of biological process+++developmental process+++cellular component organization or biogenesis	0.434045	5.44337e-17	1.58541e-15
24947	Gabra3	mRNA	GO:0006811///ion transport+++GO:0006821///chloride transport+++GO:0007165///signal transduction+++GO:0007214///gamma-aminobutyric acid signaling pathway+++GO:0007268///chemical synaptic transmission+++GO:0034220///ion transmembrane transport+++GO:0042391///regulation of membrane potential+++GO:0050877///nervous system process+++GO:0051932///synaptic transmission, GABAergic+++GO:0060078///regulati…	biological_process	localization+++regulation of biological process+++response to stimulus+++signaling+++cellular process+++biological regulation+++multicellular organismal process	0.326595	1.98376e-15	5.08998e-14
25111	Chrm4	mRNA	GO:0007165///signal transduction+++GO:0007186///G protein-coupled receptor signaling pathway+++GO:0007187///G protein-coupled receptor signaling pathway, coupled to cyclic nucleotide second messenger+++GO:0007197///adenylate cyclase-inhibiting G protein-coupled acetylcholine receptor signaling pathway+++GO:0007268///chemical synaptic transmission+++GO:0010033///response to organic substance+++GO:…	biological_process	regulation of biological process+++response to stimulus+++signaling+++cellular process+++biological regulation+++locomotion	0.495088	1.68394e-05	0.000124344
25340	Npy5r	mRNA	GO:0002675///positive regulation of acute inflammatory response+++GO:0002865///negative regulation of acute inflammatory response to antigenic stimulus+++GO:0003151///outflow tract morphogenesis+++GO:0003214///cardiac left ventricle morphogenesis+++GO:0007165///signal transduction+++GO:0007186///G protein-coupled receptor signaling pathway+++GO:0007218///neuropeptide signaling pathway+++GO:000726…	biological_process	regulation of biological process+++response to stimulus+++positive regulation of biological process+++biological regulation+++immune system process+++negative regulation of biological process+++developmental process+++multicellular organismal process+++signaling+++cellular process+++cell proliferation+++localization+++behavior+++reproduction+++reproductive process+++rhythmic process+++metabolic p…	0.42241	3.29003e-05	0.000227533
257648	Cacna1b	mRNA	GO:0001956///positive regulation of neurotransmitter secretion+++GO:0006811///ion transport+++GO:0006816///calcium ion transport+++GO:0007268///chemical synaptic transmission+++GO:0007269///neurotransmitter secretion+++GO:0007626///locomotory behavior+++GO:0008016///regulation of heart contraction+++GO:0008217///regulation of blood pressure+++GO:0014070///response to organic cyclic compound+++GO:…	biological_process	regulation of biological process+++localization+++signaling+++positive regulation of biological process+++cellular process+++biological regulation+++behavior+++multicellular organismal process+++response to stimulus	0.341829	3.62085e-30	2.66401e-28
29190	Pdyn	mRNA	GO:0007218///neuropeptide signaling pathway+++GO:0007268///chemical synaptic transmission+++GO:0007600///sensory perception+++GO:0046928///regulation of neurotransmitter secretion	biological_process	regulation of biological process+++response to stimulus+++signaling+++cellular process+++biological regulation+++multicellular organismal process+++localization	0.396801	7.52772e-15	1.84616e-13
29559	Grik1	mRNA	GO:0006811///ion transport+++GO:0007268///chemical synaptic transmission+++GO:0007399///nervous system development+++GO:0014054///positive regulation of gamma-aminobutyric acid secretion+++GO:0030534///adult behavior+++GO:0032229///negative regulation of synaptic transmission, GABAergic+++GO:0032230///positive regulation of synaptic transmission, GABAergic+++GO:0034220///ion transmembrane transpo…	biological_process	localization+++signaling+++cellular process+++developmental process+++multicellular organismal process+++regulation of biological process+++positive regulation of biological process+++biological regulation+++behavior+++negative regulation of biological process+++response to stimulus	0.339395	6.15367e-06	4.92079e-05
29717	Cacna1g	mRNA	GO:0001508///action potential+++GO:0002027///regulation of heart rate+++GO:0006811///ion transport+++GO:0006816///calcium ion transport+++GO:0007204///positive regulation of cytosolic calcium ion concentration+++GO:0007268///chemical synaptic transmission+++GO:0010045///response to nickel cation+++GO:0014824///artery smooth muscle contraction+++GO:0019228///neuronal action potential+++GO:0034220/…	biological_process	biological regulation+++regulation of biological process+++multicellular organismal process+++localization+++cellular process+++signaling+++response to stimulus+++positive regulation of biological process	0.358351	2.43869e-44	3.21416e-42
298521	Grik3	mRNA	GO:0006811///ion transport+++GO:0007196///adenylate cyclase-inhibiting G protein-coupled glutamate receptor signaling pathway+++GO:0007215///glutamate receptor signaling pathway+++GO:0007216///G protein-coupled glutamate receptor signaling pathway+++GO:0007268///chemical synaptic transmission+++GO:0034220///ion transmembrane transport+++GO:0035235///ionotropic glutamate receptor signaling pathway…	biological_process	localization+++regulation of biological process+++response to stimulus+++signaling+++cellular process+++biological regulation+++negative regulation of biological process	0.458586	2.00012e-08	2.44934e-07
315840	Myo6	mRNA	GO:0006605///protein targeting+++GO:0006886///intracellular protein transport+++GO:0006897///endocytosis+++GO:0007015///actin filament organization+++GO:0007268///chemical synaptic transmission+++GO:0007416///synapse assembly+++GO:0007605///sensory perception of sound+++GO:0007626///locomotory behavior+++GO:0014047///glutamate secretion+++GO:0016358///dendrite development+++GO:0030048///actin fil…	biological_process	localization+++cellular process+++cellular component organization or biogenesis+++signaling+++developmental process+++multicellular organismal process+++behavior+++regulation of biological process+++response to stimulus+++biological regulation+++metabolic process+++positive regulation of biological process	0.422259	4.92073e-91	2.31148e-88
50564	Gjd2	mRNA	GO:0001508///action potential+++GO:0007154///cell communication+++GO:0007267///cell-cell signaling+++GO:0007268///chemical synaptic transmission+++GO:0007601///visual perception+++GO:0055085///transmembrane transport	biological_process	biological regulation+++cellular process+++signaling+++multicellular organismal process+++localization	0.411007	1.80894e-05	0.000132666
50592	Gria1	mRNA	GO:0001919///regulation of receptor recycling+++GO:0006811///ion transport+++GO:0007268///chemical synaptic transmission+++GO:0007616///long-term memory+++GO:0009636///response to toxic substance+++GO:0010226///response to lithium ion+++GO:0014070///response to organic cyclic compound+++GO:0019228///neuronal action potential+++GO:0021510///spinal cord development+++GO:0031623///receptor internali…	biological_process	metabolic process+++regulation of biological process+++signaling+++cellular process+++biological regulation+++localization+++behavior+++multicellular organismal process+++response to stimulus+++developmental process+++positive regulation of biological process+++negative regulation of biological process	0.388484	5.20056e-16	1.38279e-14
54234	Cacna1e	mRNA	GO:0001662///behavioral fear response+++GO:0002027///regulation of heart rate+++GO:0006811///ion transport+++GO:0006816///calcium ion transport+++GO:0007268///chemical synaptic transmission+++GO:0007626///locomotory behavior+++GO:0008542///visual learning+++GO:0019226///transmission of nerve impulse+++GO:0019233///sensory perception of pain+++GO:0030317///flagellated sperm motility+++GO:0034765//…	biological_process	behavior+++response to stimulus+++multicellular organismal process+++regulation of biological process+++biological regulation+++localization+++signaling+++cellular process+++locomotion	0.407799	5.82902e-74	1.94159e-71
60590	Grm8	mRNA	GO:0007165///signal transduction+++GO:0007186///G protein-coupled receptor signaling pathway+++GO:0007193///adenylate cyclase-inhibiting G protein-coupled receptor signaling pathway+++GO:0007196///adenylate cyclase-inhibiting G protein-coupled glutamate receptor signaling pathway+++GO:0007216///G protein-coupled glutamate receptor signaling pathway+++GO:0007268///chemical synaptic transmission+++…	biological_process	regulation of biological process+++response to stimulus+++signaling+++cellular process+++biological regulation+++multicellular organismal process+++localization	0.375067	6.43594e-05	0.000419148
81645	Chrm2	mRNA	GO:0006940///regulation of smooth muscle contraction+++GO:0007165///signal transduction+++GO:0007186///G protein-coupled receptor signaling pathway+++GO:0007187///G protein-coupled receptor signaling pathway, coupled to cyclic nucleotide second messenger+++GO:0007197///adenylate cyclase-inhibiting G protein-coupled acetylcholine receptor signaling pathway+++GO:0007213///G protein-coupled acetylch…	biological_process	regulation of biological process+++multicellular organismal process+++biological regulation+++response to stimulus+++signaling+++cellular process+++multi-organism process+++localization	0.322306	8.69003e-07	8.11424e-06
81672	Grm7	mRNA	GO:0001661///conditioned taste aversion+++GO:0001662///behavioral fear response+++GO:0007165///signal transduction+++GO:0007186///G protein-coupled receptor signaling pathway+++GO:0007193///adenylate cyclase-inhibiting G protein-coupled receptor signaling pathway+++GO:0007196///adenylate cyclase-inhibiting G protein-coupled glutamate receptor signaling pathway+++GO:0007216///G protein-coupled glu…	biological_process	behavior+++multicellular organismal process+++response to stimulus+++regulation of biological process+++signaling+++cellular process+++biological regulation+++negative regulation of biological process+++localization	0.39857	1.50406e-17	4.57713e-16
83731	Kcnma1	mRNA	GO:0001666///response to hypoxia+++GO:0006811///ion transport+++GO:0006813///potassium ion transport+++GO:0006970///response to osmotic stress+++GO:0007268///chemical synaptic transmission+++GO:0007568///aging+++GO:0007605///sensory perception of sound+++GO:0007623///circadian rhythm+++GO:0007628///adult walking behavior+++GO:0009268///response to pH+++GO:0019228///neuronal action potential+++GO:…	biological_process	response to stimulus+++localization+++signaling+++cellular process+++developmental process+++multicellular organismal process+++rhythmic process+++behavior+++biological regulation+++metabolic process+++regulation of biological process+++positive regulation of biological process+++cellular component organization or biogenesis+++negative regulation of biological process	0.348082	3.89481e-10	5.99101e-09
84408	Cdh8	mRNA	GO:0000902///cell morphogenesis+++GO:0007043///cell-cell junction assembly+++GO:0007155///cell adhesion+++GO:0007156///homophilic cell adhesion via plasma membrane adhesion molecules+++GO:0007268///chemical synaptic transmission+++GO:0007275///multicellular organism development+++GO:0007283///spermatogenesis+++GO:0009409///response to cold+++GO:0016339///calcium-dependent cell-cell adhesion via p…	biological_process	developmental process+++cellular process+++cellular component organization or biogenesis+++biological adhesion+++signaling+++multicellular organismal process+++reproduction+++reproductive process+++multi-organism process+++response to stimulus+++regulation of biological process+++biological regulation	0.374713	2.27196e-11	4.04099e-10
sensory perception of pain
Gene ID	Gene Symbol	Type	GO_P Term	GO_P Term Level1	GO_P Term Level2	log2 (SMIR_SCDH / Con_SCDH)	Pvalue(SMIR_SCDH / Con_SCDH)	Qvalue (SMIR_SCDH / Con_SCDH)
24409	Grin2a	mRNA	GO:0001508///action potential+++GO:0001964///startle response+++GO:0001975///response to amphetamine+++GO:0006811///ion transport+++GO:0006816///calcium ion transport+++GO:0007268///chemical synaptic transmission+++GO:0007611///learning or memory+++GO:0007612///learning+++GO:0007613///memory+++GO:0008542///visual learning+++GO:0009416///response to light stimulus+++GO:0009611///response to woundi…	biological_process	biological regulation+++response to stimulus+++multicellular organismal process+++localization+++signaling+++cellular process+++behavior+++regulation of biological process+++positive regulation of biological process+++developmental process+++locomotion+++metabolic process+++negative regulation of biological process+++rhythmic process+++multi-organism process+++cellular component organization or b…	0.628588	7.28339e-30	5.25322e-28
24590	Mme	mRNA	GO:0001822///kidney development+++GO:0001890///placenta development+++GO:0006508///proteolysis+++GO:0006518///peptide metabolic process+++GO:0007568///aging+++GO:0007611///learning or memory+++GO:0019233///sensory perception of pain+++GO:0030324///lung development+++GO:0046449///creatinine metabolic process+++GO:0050435///amyloid-beta metabolic process+++GO:0050769///positive regulation of neurog…	biological_process	developmental process+++multicellular organismal process+++reproduction+++reproductive process+++metabolic process+++cellular process+++behavior+++regulation of biological process+++positive regulation of biological process+++biological regulation+++response to stimulus+++signaling	0.383545	0.000117125	0.000717396
24807	Tacr1	mRNA	GO:0002118///aggressive behavior+++GO:0002526///acute inflammatory response+++GO:0002687///positive regulation of leukocyte migration+++GO:0003051///angiotensin-mediated drinking behavior+++GO:0007165///signal transduction+++GO:0007186///G protein-coupled receptor signaling pathway+++GO:0007204///positive regulation of cytosolic calcium ion concentration+++GO:0007217///tachykinin receptor signali…	biological_process	behavior+++multi-organism process+++response to stimulus+++regulation of biological process+++immune system process+++locomotion+++localization+++cellular process+++positive regulation of biological process+++biological regulation+++multicellular organismal process+++signaling+++reproduction+++reproductive process+++cell proliferation+++cellular component organization or biogenesis	0.358199	4.73447e-11	8.12892e-10
25245	Bdkrb2	mRNA	GO:0002438///acute inflammatory response to antigenic stimulus+++GO:0006939///smooth muscle contraction+++GO:0007165///signal transduction+++GO:0007186///G protein-coupled receptor signaling pathway+++GO:0007204///positive regulation of cytosolic calcium ion concentration+++GO:0008285///negative regulation of cell proliferation+++GO:0009651///response to salt stress+++GO:0014832///urinary bladder…	biological_process	immune system process+++response to stimulus+++multicellular organismal process+++regulation of biological process+++signaling+++cellular process+++biological regulation+++cell proliferation+++negative regulation of biological process+++metabolic process+++localization	0.816689	6.12668e-05	0.000400574
25248	Cnr1	mRNA	GO:0002866///positive regulation of acute inflammatory response to antigenic stimulus+++GO:0007186///G protein-coupled receptor signaling pathway+++GO:0007188///adenylate cyclase-modulating G protein-coupled receptor signaling pathway+++GO:0007189///adenylate cyclase-activating G protein-coupled receptor signaling pathway+++GO:0007283///spermatogenesis+++GO:0007413///axonal fasciculation+++GO:000…	biological_process	regulation of biological process+++immune system process+++response to stimulus+++positive regulation of biological process+++biological regulation+++signaling+++cellular process+++reproduction+++reproductive process+++multicellular organismal process+++multi-organism process+++developmental process+++cellular component organization or biogenesis+++behavior+++negative regulation of biological pro…	0.333786	1.44623e-22	6.70758e-21
25601	Oprm1	mRNA	GO:0002438///acute inflammatory response to antigenic stimulus+++GO:0006955///immune response+++GO:0007165///signal transduction+++GO:0007186///G protein-coupled receptor signaling pathway+++GO:0007191///adenylate cyclase-activating dopamine receptor signaling pathway+++GO:0007193///adenylate cyclase-inhibiting G protein-coupled receptor signaling pathway+++GO:0007197///adenylate cyclase-inhibiti…	biological_process	immune system process+++response to stimulus+++regulation of biological process+++signaling+++cellular process+++biological regulation+++behavior+++multicellular organismal process+++positive regulation of biological process+++multi-organism process+++negative regulation of biological process+++reproduction+++reproductive process+++rhythmic process+++metabolic process+++developmental process+++lo…	0.711031	4.77201e-07	4.68506e-06
257648	Cacna1b	mRNA	GO:0001956///positive regulation of neurotransmitter secretion+++GO:0006811///ion transport+++GO:0006816///calcium ion transport+++GO:0007268///chemical synaptic transmission+++GO:0007269///neurotransmitter secretion+++GO:0007626///locomotory behavior+++GO:0008016///regulation of heart contraction+++GO:0008217///regulation of blood pressure+++GO:0014070///response to organic cyclic compound+++GO:…	biological_process	regulation of biological process+++localization+++signaling+++positive regulation of biological process+++cellular process+++biological regulation+++behavior+++multicellular organismal process+++response to stimulus	0.341829	3.62085e-30	2.66401e-28
29335	Oprk1	mRNA	GO:0006955///immune response+++GO:0007165///signal transduction+++GO:0007186///G protein-coupled receptor signaling pathway+++GO:0007200///phospholipase C-activating G protein-coupled receptor signaling pathway+++GO:0007218///neuropeptide signaling pathway+++GO:0007610///behavior+++GO:0007626///locomotory behavior+++GO:0009314///response to radiation+++GO:0010996///response to auditory stimulus++…	biological_process	immune system process+++response to stimulus+++regulation of biological process+++signaling+++cellular process+++biological regulation+++behavior+++multicellular organismal process+++localization+++positive regulation of biological process+++negative regulation of biological process+++locomotion+++reproduction+++reproductive process+++rhythmic process+++multi-organism process+++metabolic process	0.387418	4.81282e-06	3.93444e-05
54234	Cacna1e	mRNA	GO:0001662///behavioral fear response+++GO:0002027///regulation of heart rate+++GO:0006811///ion transport+++GO:0006816///calcium ion transport+++GO:0007268///chemical synaptic transmission+++GO:0007626///locomotory behavior+++GO:0008542///visual learning+++GO:0019226///transmission of nerve impulse+++GO:0019233///sensory perception of pain+++GO:0030317///flagellated sperm motility+++GO:0034765//…	biological_process	behavior+++response to stimulus+++multicellular organismal process+++regulation of biological process+++biological regulation+++localization+++signaling+++cellular process+++locomotion	0.407799	5.82902e-74	1.94159e-71
57302	Cnr2	mRNA	GO:0001975///response to amphetamine+++GO:0006954///inflammatory response+++GO:0007165///signal transduction+++GO:0007186///G protein-coupled receptor signaling pathway+++GO:0007189///adenylate cyclase-activating G protein-coupled receptor signaling pathway+++GO:0019222///regulation of metabolic process+++GO:0019233///sensory perception of pain+++GO:0030595///leukocyte chemotaxis+++GO:0032229///n…	biological_process	response to stimulus+++regulation of biological process+++signaling+++cellular process+++biological regulation+++metabolic process+++multicellular organismal process+++immune system process+++locomotion+++localization+++negative regulation of biological process+++multi-organism process	0.329283	6.64855e-05	0.000432226
60590	Grm8	mRNA	GO:0007165///signal transduction+++GO:0007186///G protein-coupled receptor signaling pathway+++GO:0007193///adenylate cyclase-inhibiting G protein-coupled receptor signaling pathway+++GO:0007196///adenylate cyclase-inhibiting G protein-coupled glutamate receptor signaling pathway+++GO:0007216///G protein-coupled glutamate receptor signaling pathway+++GO:0007268///chemical synaptic transmission+++…	biological_process	regulation of biological process+++response to stimulus+++signaling+++cellular process+++biological regulation+++multicellular organismal process+++localization	0.375067	6.43594e-05	0.000419148
63887	Nmu	mRNA	GO:0001659///temperature homeostasis+++GO:0001696///gastric acid secretion+++GO:0003084///positive regulation of systemic arterial blood pressure+++GO:0006940///regulation of smooth muscle contraction+++GO:0007204///positive regulation of cytosolic calcium ion concentration+++GO:0007218///neuropeptide signaling pathway+++GO:0009648///photoperiodism+++GO:0010460///positive regulation of heart rate…	biological_process	multicellular organismal process+++biological regulation+++localization+++regulation of biological process+++cellular process+++response to stimulus+++signaling+++positive regulation of biological process+++behavior+++rhythmic process+++negative regulation of biological process	0.474798	0.000133184	0.000805788
78960	Prx	mRNA	GO:0008366///axon ensheathment+++GO:0019226///transmission of nerve impulse+++GO:0019233///sensory perception of pain+++GO:0021675///nerve development+++GO:0032287///peripheral nervous system myelin maintenance+++GO:0032290///peripheral nervous system myelin formation+++GO:0043484///regulation of RNA splicing	biological_process	developmental process+++multicellular organismal process+++cellular process+++signaling+++cellular component organization or biogenesis+++metabolic process+++regulation of biological process+++biological regulation	0.802799	1.50047e-12	2.9879e-11
locomotory behavior
Gene ID	Gene Symbol	Type	GO_P Term	GO_P Term Level1	GO_P Term Level2	log2 (SMIR_SCDH / Con_SCDH)	Pvalue(SMIR_SCDH / Con_SCDH)	Qvalue (SMIR_SCDH / Con_SCDH)
103689983	LOC103689983	mRNA	GO:0001913///T cell mediated cytotoxicity+++GO:0001975///response to amphetamine+++GO:0006164///purine nucleotide biosynthetic process+++GO:0006166///purine ribonucleoside salvage+++GO:0006168///adenine salvage+++GO:0006178///guanine salvage+++GO:0007283///spermatogenesis+++GO:0007420///brain development+++GO:0007625///grooming behavior+++GO:0007626///locomotory behavior+++GO:0021756///striatum d…	biological_process	immune system process+++response to stimulus+++cell killing+++metabolic process+++cellular process+++reproduction+++reproductive process+++multicellular organismal process+++multi-organism process+++developmental process+++behavior+++regulation of biological process+++positive regulation of biological process+++biological regulation+++cell proliferation+++cellular component organization or biogen…	5.97671	4.74017e-09	6.32944e-08
114501	Lmx1b	mRNA	GO:0001764///neuron migration+++GO:0002930///trabecular meshwork development+++GO:0006355///regulation of transcription, DNA-templated+++GO:0006357///regulation of transcription by RNA polymerase II+++GO:0007613///memory+++GO:0007626///locomotory behavior+++GO:0008150///biological_process+++GO:0008283///cell proliferation+++GO:0009953///dorsal/ventral pattern formation+++GO:0010468///regulation o…	biological_process	developmental process+++locomotion+++localization+++multicellular organismal process+++cellular process+++metabolic process+++regulation of biological process+++biological regulation+++behavior+++biological_process+++cell proliferation+++cellular component organization or biogenesis+++growth+++response to stimulus+++positive regulation of biological process	0.372469	3.60513e-06	3.02685e-05
24418	Grm5	mRNA	GO:0000185///activation of MAPKKK activity+++GO:0001932///regulation of protein phosphorylation+++GO:0002029///desensitization of G protein-coupled receptor signaling pathway+++GO:0006355///regulation of transcription, DNA-templated+++GO:0006448///regulation of translational elongation+++GO:0006468///protein phosphorylation+++GO:0007165///signal transduction+++GO:0007186///G protein-coupled recep…	biological_process	metabolic process+++regulation of biological process+++response to stimulus+++signaling+++positive regulation of biological process+++cellular process+++biological regulation+++negative regulation of biological process+++behavior+++multicellular organismal process+++locomotion+++developmental process+++cellular component organization or biogenesis+++localization	0.479358	9.33452e-31	7.15516e-29
25601	Oprm1	mRNA	GO:0002438///acute inflammatory response to antigenic stimulus+++GO:0006955///immune response+++GO:0007165///signal transduction+++GO:0007186///G protein-coupled receptor signaling pathway+++GO:0007191///adenylate cyclase-activating dopamine receptor signaling pathway+++GO:0007193///adenylate cyclase-inhibiting G protein-coupled receptor signaling pathway+++GO:0007197///adenylate cyclase-inhibiti…	biological_process	immune system process+++response to stimulus+++regulation of biological process+++signaling+++cellular process+++biological regulation+++behavior+++multicellular organismal process+++positive regulation of biological process+++multi-organism process+++negative regulation of biological process+++reproduction+++reproductive process+++rhythmic process+++metabolic process+++developmental process+++lo…	0.711031	4.77201e-07	4.68506e-06
257648	Cacna1b	mRNA	GO:0001956///positive regulation of neurotransmitter secretion+++GO:0006811///ion transport+++GO:0006816///calcium ion transport+++GO:0007268///chemical synaptic transmission+++GO:0007269///neurotransmitter secretion+++GO:0007626///locomotory behavior+++GO:0008016///regulation of heart contraction+++GO:0008217///regulation of blood pressure+++GO:0014070///response to organic cyclic compound+++GO:…	biological_process	regulation of biological process+++localization+++signaling+++positive regulation of biological process+++cellular process+++biological regulation+++behavior+++multicellular organismal process+++response to stimulus	0.341829	3.62085e-30	2.66401e-28
29335	Oprk1	mRNA	GO:0006955///immune response+++GO:0007165///signal transduction+++GO:0007186///G protein-coupled receptor signaling pathway+++GO:0007200///phospholipase C-activating G protein-coupled receptor signaling pathway+++GO:0007218///neuropeptide signaling pathway+++GO:0007610///behavior+++GO:0007626///locomotory behavior+++GO:0009314///response to radiation+++GO:0010996///response to auditory stimulus++…	biological_process	immune system process+++response to stimulus+++regulation of biological process+++signaling+++cellular process+++biological regulation+++behavior+++multicellular organismal process+++localization+++positive regulation of biological process+++negative regulation of biological process+++locomotion+++reproduction+++reproductive process+++rhythmic process+++multi-organism process+++metabolic process	0.387418	4.81282e-06	3.93444e-05
29710	Scn8a	mRNA	GO:0006811///ion transport+++GO:0006814///sodium ion transport+++GO:0007422///peripheral nervous system development+++GO:0007517///muscle organ development+++GO:0007605///sensory perception of sound+++GO:0007626///locomotory behavior+++GO:0007628///adult walking behavior+++GO:0008344///adult locomotory behavior+++GO:0009636///response to toxic substance+++GO:0019228///neuronal action potential+++…	biological_process	localization+++developmental process+++multicellular organismal process+++behavior+++response to stimulus+++signaling+++cellular process+++biological regulation+++regulation of biological process	0.403102	1.69409e-63	4.25146e-61
315840	Myo6	mRNA	GO:0006605///protein targeting+++GO:0006886///intracellular protein transport+++GO:0006897///endocytosis+++GO:0007015///actin filament organization+++GO:0007268///chemical synaptic transmission+++GO:0007416///synapse assembly+++GO:0007605///sensory perception of sound+++GO:0007626///locomotory behavior+++GO:0014047///glutamate secretion+++GO:0016358///dendrite development+++GO:0030048///actin fil…	biological_process	localization+++cellular process+++cellular component organization or biogenesis+++signaling+++developmental process+++multicellular organismal process+++behavior+++regulation of biological process+++response to stimulus+++biological regulation+++metabolic process+++positive regulation of biological process	0.422259	4.92073e-91	2.31148e-88
54234	Cacna1e	mRNA	GO:0001662///behavioral fear response+++GO:0002027///regulation of heart rate+++GO:0006811///ion transport+++GO:0006816///calcium ion transport+++GO:0007268///chemical synaptic transmission+++GO:0007626///locomotory behavior+++GO:0008542///visual learning+++GO:0019226///transmission of nerve impulse+++GO:0019233///sensory perception of pain+++GO:0030317///flagellated sperm motility+++GO:0034765//…	biological_process	behavior+++response to stimulus+++multicellular organismal process+++regulation of biological process+++biological regulation+++localization+++signaling+++cellular process+++locomotion	0.407799	5.82902e-74	1.94159e-71
59318	Negr1	mRNA	GO:0007155///cell adhesion+++GO:0007626///locomotory behavior+++GO:0007631///feeding behavior+++GO:0010976///positive regulation of neuron projection development+++GO:0098609///cell-cell adhesion	biological_process	biological adhesion+++behavior+++developmental process+++regulation of biological process+++positive regulation of biological process+++cellular process+++multicellular organismal process+++cellular component organization or biogenesis+++biological regulation	0.35045	1.70155e-15	4.39667e-14
64443	Gpr88	mRNA	GO:0007165///signal transduction+++GO:0007186///G protein-coupled receptor signaling pathway+++GO:0007602///phototransduction+++GO:0007626///locomotory behavior+++GO:0009584///detection of visible light+++GO:0019228///neuronal action potential+++GO:0050885///neuromuscular process controlling balance+++GO:0061743///motor learning+++GO:0071482///cellular response to light stimulus	biological_process	regulation of biological process+++response to stimulus+++signaling+++cellular process+++biological regulation+++behavior+++multicellular organismal process	0.322159	9.57463e-05	0.000599068
690865	Pcdh15	mRNA	GO:0001964///startle response+++GO:0002009///morphogenesis of an epithelium+++GO:0007015///actin filament organization+++GO:0007155///cell adhesion+++GO:0007156///homophilic cell adhesion via plasma membrane adhesion molecules+++GO:0007601///visual perception+++GO:0007605///sensory perception of sound+++GO:0007626///locomotory behavior+++GO:0007628///adult walking behavior+++GO:0008344///adult lo…	biological_process	response to stimulus+++multicellular organismal process+++developmental process+++cellular process+++cellular component organization or biogenesis+++biological adhesion+++behavior+++growth+++biological regulation	0.401274	3.66697e-05	0.000250294
regulation of membrane potential
Gene ID	Gene Symbol	Type	GO_P Term	GO_P Term Level1	GO_P Term Level2	log2 (SMIR_SCDH / Con_SCDH)	Pvalue(SMIR_SCDH / Con_SCDH)	Qvalue (SMIR_SCDH / Con_SCDH)
140675	Gabra4	mRNA	GO:0006811///ion transport+++GO:0006821///chloride transport+++GO:0007165///signal transduction+++GO:0007214///gamma-aminobutyric acid signaling pathway+++GO:0007268///chemical synaptic transmission+++GO:0007417///central nervous system development+++GO:0034220///ion transmembrane transport+++GO:0042391///regulation of membrane potential+++GO:0050877///nervous system process+++GO:0051932///synapt…	biological_process	localization+++regulation of biological process+++response to stimulus+++signaling+++cellular process+++biological regulation+++developmental process+++multicellular organismal process	0.396447	1.13135e-06	1.03528e-05
171146	Kcnh5	mRNA	GO:0006811///ion transport+++GO:0006813///potassium ion transport+++GO:0010389///regulation of G2/M transition of mitotic cell cycle+++GO:0034765///regulation of ion transmembrane transport+++GO:0042391///regulation of membrane potential+++GO:0055085///transmembrane transport+++GO:0071805///potassium ion transmembrane transport	biological_process	localization+++regulation of biological process+++cellular process+++biological regulation	0.718552	6.62455e-11	1.11239e-09
24409	Grin2a	mRNA	GO:0001508///action potential+++GO:0001964///startle response+++GO:0001975///response to amphetamine+++GO:0006811///ion transport+++GO:0006816///calcium ion transport+++GO:0007268///chemical synaptic transmission+++GO:0007611///learning or memory+++GO:0007612///learning+++GO:0007613///memory+++GO:0008542///visual learning+++GO:0009416///response to light stimulus+++GO:0009611///response to woundi…	biological_process	biological regulation+++response to stimulus+++multicellular organismal process+++localization+++signaling+++cellular process+++behavior+++regulation of biological process+++positive regulation of biological process+++developmental process+++locomotion+++metabolic process+++negative regulation of biological process+++rhythmic process+++multi-organism process+++cellular component organization or b…	0.628588	7.28339e-30	5.25322e-28
24922	Gabrb3	mRNA	GO:0006811///ion transport+++GO:0006821///chloride transport+++GO:0007165///signal transduction+++GO:0007214///gamma-aminobutyric acid signaling pathway+++GO:0007268///chemical synaptic transmission+++GO:0007605///sensory perception of sound+++GO:0034220///ion transmembrane transport+++GO:0042391///regulation of membrane potential+++GO:0043523///regulation of neuron apoptotic process+++GO:0043524…	biological_process	localization+++regulation of biological process+++response to stimulus+++signaling+++cellular process+++biological regulation+++multicellular organismal process+++negative regulation of biological process+++developmental process+++cellular component organization or biogenesis	0.434045	5.44337e-17	1.58541e-15
24947	Gabra3	mRNA	GO:0006811///ion transport+++GO:0006821///chloride transport+++GO:0007165///signal transduction+++GO:0007214///gamma-aminobutyric acid signaling pathway+++GO:0007268///chemical synaptic transmission+++GO:0034220///ion transmembrane transport+++GO:0042391///regulation of membrane potential+++GO:0050877///nervous system process+++GO:0051932///synaptic transmission, GABAergic+++GO:0060078///regulati…	biological_process	localization+++regulation of biological process+++response to stimulus+++signaling+++cellular process+++biological regulation+++multicellular organismal process	0.326595	1.98376e-15	5.08998e-14
29559	Grik1	mRNA	GO:0006811///ion transport+++GO:0007268///chemical synaptic transmission+++GO:0007399///nervous system development+++GO:0014054///positive regulation of gamma-aminobutyric acid secretion+++GO:0030534///adult behavior+++GO:0032229///negative regulation of synaptic transmission, GABAergic+++GO:0032230///positive regulation of synaptic transmission, GABAergic+++GO:0034220///ion transmembrane transpo…	biological_process	localization+++signaling+++cellular process+++developmental process+++multicellular organismal process+++regulation of biological process+++positive regulation of biological process+++biological regulation+++behavior+++negative regulation of biological process+++response to stimulus	0.339395	6.15367e-06	4.92079e-05
29717	Cacna1g	mRNA	GO:0001508///action potential+++GO:0002027///regulation of heart rate+++GO:0006811///ion transport+++GO:0006816///calcium ion transport+++GO:0007204///positive regulation of cytosolic calcium ion concentration+++GO:0007268///chemical synaptic transmission+++GO:0010045///response to nickel cation+++GO:0014824///artery smooth muscle contraction+++GO:0019228///neuronal action potential+++GO:0034220/…	biological_process	biological regulation+++regulation of biological process+++multicellular organismal process+++localization+++cellular process+++signaling+++response to stimulus+++positive regulation of biological process	0.358351	2.43869e-44	3.21416e-42
298521	Grik3	mRNA	GO:0006811///ion transport+++GO:0007196///adenylate cyclase-inhibiting G protein-coupled glutamate receptor signaling pathway+++GO:0007215///glutamate receptor signaling pathway+++GO:0007216///G protein-coupled glutamate receptor signaling pathway+++GO:0007268///chemical synaptic transmission+++GO:0034220///ion transmembrane transport+++GO:0035235///ionotropic glutamate receptor signaling pathway…	biological_process	localization+++regulation of biological process+++response to stimulus+++signaling+++cellular process+++biological regulation+++negative regulation of biological process	0.458586	2.00012e-08	2.44934e-07
315311	Slc4a8	mRNA	GO:0006811///ion transport+++GO:0006814///sodium ion transport+++GO:0006820///anion transport+++GO:0015701///bicarbonate transport+++GO:0035725///sodium ion transmembrane transport+++GO:0042391///regulation of membrane potential+++GO:0050804///modulation of chemical synaptic transmission+++GO:0051453///regulation of intracellular pH+++GO:1902476///chloride transmembrane transport+++GO:2000302///p…	biological_process	localization+++biological regulation+++regulation of biological process+++signaling+++cellular process+++positive regulation of biological process	0.413514	2.87135e-23	1.40275e-21
56827	Cacna1i	mRNA	GO:0006811///ion transport+++GO:0006816///calcium ion transport+++GO:0019228///neuronal action potential+++GO:0030317///flagellated sperm motility+++GO:0030431///sleep+++GO:0034765///regulation of ion transmembrane transport+++GO:0035725///sodium ion transmembrane transport+++GO:0042391///regulation of membrane potential+++GO:0045956///positive regulation of calcium ion-dependent exocytosis+++GO:…	biological_process	localization+++signaling+++cellular process+++multicellular organismal process+++biological regulation+++locomotion+++regulation of biological process+++positive regulation of biological process	0.359242	7.03611e-19	2.45527e-17
65025	Rims3	mRNA	GO:0006836///neurotransmitter transport+++GO:0006887///exocytosis+++GO:0017156///calcium ion regulated exocytosis+++GO:0042391///regulation of membrane potential+++GO:0048167///regulation of synaptic plasticity+++GO:0048791///calcium ion-regulated exocytosis of neurotransmitter+++GO:0050806///positive regulation of synaptic transmission+++GO:0050807///regulation of synapse organization+++GO:20003…	biological_process	localization+++cellular process+++biological regulation+++regulation of biological process+++signaling+++positive regulation of biological process+++cellular component organization or biogenesis	0.361199	2.49599e-10	3.95901e-09
83731	Kcnma1	mRNA	GO:0001666///response to hypoxia+++GO:0006811///ion transport+++GO:0006813///potassium ion transport+++GO:0006970///response to osmotic stress+++GO:0007268///chemical synaptic transmission+++GO:0007568///aging+++GO:0007605///sensory perception of sound+++GO:0007623///circadian rhythm+++GO:0007628///adult walking behavior+++GO:0009268///response to pH+++GO:0019228///neuronal action potential+++GO:…	biological_process	response to stimulus+++localization+++signaling+++cellular process+++developmental process+++multicellular organismal process+++rhythmic process+++behavior+++biological regulation+++metabolic process+++regulation of biological process+++positive regulation of biological process+++cellular component organization or biogenesis+++negative regulation of biological process	0.348082	3.89481e-10	5.99101e-09
ionotropic glutamate receptor signaling pathway
Gene ID	Gene Symbol	Type	GO_P Term	GO_P Term Level1	GO_P Term Level2	log2 (SMIR_SCDH / Con_SCDH)	Pvalue(SMIR_SCDH / Con_SCDH)	Qvalue (SMIR_SCDH / Con_SCDH)
116671	Cdk5r1	mRNA	GO:0001764///neuron migration+++GO:0007158///neuron cell-cell adhesion+++GO:0007213///G protein-coupled acetylcholine receptor signaling pathway+++GO:0007411///axon guidance+++GO:0007413///axonal fasciculation+++GO:0007420///brain development+++GO:0009792///embryo development ending in birth or egg hatching+++GO:0010870///positive regulation of receptor biosynthetic process+++GO:0018105///peptidy…	biological_process	developmental process+++locomotion+++localization+++multicellular organismal process+++cellular process+++biological adhesion+++regulation of biological process+++response to stimulus+++signaling+++biological regulation+++cellular component organization or biogenesis+++metabolic process+++positive regulation of biological process+++negative regulation of biological process+++growth+++rhythmic pro…	0.3564	1.59396e-11	2.87698e-10
24409	Grin2a	mRNA	GO:0001508///action potential+++GO:0001964///startle response+++GO:0001975///response to amphetamine+++GO:0006811///ion transport+++GO:0006816///calcium ion transport+++GO:0007268///chemical synaptic transmission+++GO:0007611///learning or memory+++GO:0007612///learning+++GO:0007613///memory+++GO:0008542///visual learning+++GO:0009416///response to light stimulus+++GO:0009611///response to woundi…	biological_process	biological regulation+++response to stimulus+++multicellular organismal process+++localization+++signaling+++cellular process+++behavior+++regulation of biological process+++positive regulation of biological process+++developmental process+++locomotion+++metabolic process+++negative regulation of biological process+++rhythmic process+++multi-organism process+++cellular component organization or b…	0.628588	7.28339e-30	5.25322e-28
25400	Camk2a	mRNA	GO:0000082///G1/S transition of mitotic cell cycle+++GO:0002931///response to ischemia+++GO:0006468///protein phosphorylation+++GO:0006816///calcium ion transport+++GO:0010666///positive regulation of cardiac muscle cell apoptotic process+++GO:0016310///phosphorylation+++GO:0018105///peptidyl-serine phosphorylation+++GO:0035235///ionotropic glutamate receptor signaling pathway+++GO:0038166///angi…	biological_process	cellular process+++response to stimulus+++metabolic process+++localization+++regulation of biological process+++positive regulation of biological process+++biological regulation+++signaling+++developmental process+++multicellular organismal process+++cellular component organization or biogenesis+++locomotion	0.347121	1.35563e-19	4.99701e-18
29559	Grik1	mRNA	GO:0006811///ion transport+++GO:0007268///chemical synaptic transmission+++GO:0007399///nervous system development+++GO:0014054///positive regulation of gamma-aminobutyric acid secretion+++GO:0030534///adult behavior+++GO:0032229///negative regulation of synaptic transmission, GABAergic+++GO:0032230///positive regulation of synaptic transmission, GABAergic+++GO:0034220///ion transmembrane transpo…	biological_process	localization+++signaling+++cellular process+++developmental process+++multicellular organismal process+++regulation of biological process+++positive regulation of biological process+++biological regulation+++behavior+++negative regulation of biological process+++response to stimulus	0.339395	6.15367e-06	4.92079e-05
298521	Grik3	mRNA	GO:0006811///ion transport+++GO:0007196///adenylate cyclase-inhibiting G protein-coupled glutamate receptor signaling pathway+++GO:0007215///glutamate receptor signaling pathway+++GO:0007216///G protein-coupled glutamate receptor signaling pathway+++GO:0007268///chemical synaptic transmission+++GO:0034220///ion transmembrane transport+++GO:0035235///ionotropic glutamate receptor signaling pathway…	biological_process	localization+++regulation of biological process+++response to stimulus+++signaling+++cellular process+++biological regulation+++negative regulation of biological process	0.458586	2.00012e-08	2.44934e-07
50592	Gria1	mRNA	GO:0001919///regulation of receptor recycling+++GO:0006811///ion transport+++GO:0007268///chemical synaptic transmission+++GO:0007616///long-term memory+++GO:0009636///response to toxic substance+++GO:0010226///response to lithium ion+++GO:0014070///response to organic cyclic compound+++GO:0019228///neuronal action potential+++GO:0021510///spinal cord development+++GO:0031623///receptor internali…	biological_process	metabolic process+++regulation of biological process+++signaling+++cellular process+++biological regulation+++localization+++behavior+++multicellular organismal process+++response to stimulus+++developmental process+++positive regulation of biological process+++negative regulation of biological process	0.388484	5.20056e-16	1.38279e-14
neuropeptide signaling pathway
Gene ID	Gene Symbol	Type	GO_P Term	GO_P Term Level1	GO_P Term Level2	log2 (SMIR_SCDH / Con_SCDH)	Pvalue(SMIR_SCDH / Con_SCDH)	Qvalue (SMIR_SCDH / Con_SCDH)
24807	Tacr1	mRNA	GO:0002118///aggressive behavior+++GO:0002526///acute inflammatory response+++GO:0002687///positive regulation of leukocyte migration+++GO:0003051///angiotensin-mediated drinking behavior+++GO:0007165///signal transduction+++GO:0007186///G protein-coupled receptor signaling pathway+++GO:0007204///positive regulation of cytosolic calcium ion concentration+++GO:0007217///tachykinin receptor signali…	biological_process	behavior+++multi-organism process+++response to stimulus+++regulation of biological process+++immune system process+++locomotion+++localization+++cellular process+++positive regulation of biological process+++biological regulation+++multicellular organismal process+++signaling+++reproduction+++reproductive process+++cell proliferation+++cellular component organization or biogenesis	0.358199	4.73447e-11	8.12892e-10
25340	Npy5r	mRNA	GO:0002675///positive regulation of acute inflammatory response+++GO:0002865///negative regulation of acute inflammatory response to antigenic stimulus+++GO:0003151///outflow tract morphogenesis+++GO:0003214///cardiac left ventricle morphogenesis+++GO:0007165///signal transduction+++GO:0007186///G protein-coupled receptor signaling pathway+++GO:0007218///neuropeptide signaling pathway+++GO:000726…	biological_process	regulation of biological process+++response to stimulus+++positive regulation of biological process+++biological regulation+++immune system process+++negative regulation of biological process+++developmental process+++multicellular organismal process+++signaling+++cellular process+++cell proliferation+++localization+++behavior+++reproduction+++reproductive process+++rhythmic process+++metabolic p…	0.42241	3.29003e-05	0.000227533
25601	Oprm1	mRNA	GO:0002438///acute inflammatory response to antigenic stimulus+++GO:0006955///immune response+++GO:0007165///signal transduction+++GO:0007186///G protein-coupled receptor signaling pathway+++GO:0007191///adenylate cyclase-activating dopamine receptor signaling pathway+++GO:0007193///adenylate cyclase-inhibiting G protein-coupled receptor signaling pathway+++GO:0007197///adenylate cyclase-inhibiti…	biological_process	immune system process+++response to stimulus+++regulation of biological process+++signaling+++cellular process+++biological regulation+++behavior+++multicellular organismal process+++positive regulation of biological process+++multi-organism process+++negative regulation of biological process+++reproduction+++reproductive process+++rhythmic process+++metabolic process+++developmental process+++lo…	0.711031	4.77201e-07	4.68506e-06
29190	Pdyn	mRNA	GO:0007218///neuropeptide signaling pathway+++GO:0007268///chemical synaptic transmission+++GO:0007600///sensory perception+++GO:0046928///regulation of neurotransmitter secretion	biological_process	regulation of biological process+++response to stimulus+++signaling+++cellular process+++biological regulation+++multicellular organismal process+++localization	0.396801	7.52772e-15	1.84616e-13
29191	Tac3	mRNA	GO:0007217///tachykinin receptor signaling pathway+++GO:0007218///neuropeptide signaling pathway+++GO:0043278///response to morphine+++GO:0045777///positive regulation of blood pressure+++GO:1902093///positive regulation of flagellated sperm motility	biological_process	regulation of biological process+++response to stimulus+++signaling+++cellular process+++biological regulation+++multicellular organismal process+++locomotion+++localization+++positive regulation of biological process	0.352619	1.74408e-15	4.49388e-14
29335	Oprk1	mRNA	GO:0006955///immune response+++GO:0007165///signal transduction+++GO:0007186///G protein-coupled receptor signaling pathway+++GO:0007200///phospholipase C-activating G protein-coupled receptor signaling pathway+++GO:0007218///neuropeptide signaling pathway+++GO:0007610///behavior+++GO:0007626///locomotory behavior+++GO:0009314///response to radiation+++GO:0010996///response to auditory stimulus++…	biological_process	immune system process+++response to stimulus+++regulation of biological process+++signaling+++cellular process+++biological regulation+++behavior+++multicellular organismal process+++localization+++positive regulation of biological process+++negative regulation of biological process+++locomotion+++reproduction+++reproductive process+++rhythmic process+++multi-organism process+++metabolic process	0.387418	4.81282e-06	3.93444e-05
366274	Ntsr1	mRNA	GO:0001659///temperature homeostasis+++GO:0003085///negative regulation of systemic arterial blood pressure+++GO:0003254///regulation of membrane depolarization+++GO:0007165///signal transduction+++GO:0007186///G protein-coupled receptor signaling pathway+++GO:0007218///neuropeptide signaling pathway+++GO:0007612///learning+++GO:0008344///adult locomotory behavior+++GO:0014049///positive regulati…	biological_process	multicellular organismal process+++biological regulation+++regulation of biological process+++cellular process+++response to stimulus+++signaling+++behavior+++localization+++positive regulation of biological process+++negative regulation of biological process+++metabolic process	0.394456	4.34512e-06	3.58732e-05
50577	Galr1	mRNA	GO:0007165///signal transduction+++GO:0007186///G protein-coupled receptor signaling pathway+++GO:0007189///adenylate cyclase-activating G protein-coupled receptor signaling pathway+++GO:0007194///negative regulation of adenylate cyclase activity+++GO:0007204///positive regulation of cytosolic calcium ion concentration+++GO:0007218///neuropeptide signaling pathway+++GO:0045944///positive regulati…	biological_process	regulation of biological process+++response to stimulus+++signaling+++cellular process+++biological regulation+++metabolic process+++positive regulation of biological process+++localization+++multicellular organismal process	0.625781	1.96181e-07	2.07149e-06
54305	Sstr2	mRNA	GO:0006937///regulation of muscle contraction+++GO:0007165///signal transduction+++GO:0007186///G protein-coupled receptor signaling pathway+++GO:0007193///adenylate cyclase-inhibiting G protein-coupled receptor signaling pathway+++GO:0007218///neuropeptide signaling pathway+++GO:0007283///spermatogenesis+++GO:0021549///cerebellum development+++GO:0030432///peristalsis+++GO:0030900///forebrain de…	biological_process	regulation of biological process+++multicellular organismal process+++biological regulation+++response to stimulus+++signaling+++cellular process+++reproduction+++reproductive process+++multi-organism process+++developmental process	0.366264	2.70474e-05	0.000190874
63887	Nmu	mRNA	GO:0001659///temperature homeostasis+++GO:0001696///gastric acid secretion+++GO:0003084///positive regulation of systemic arterial blood pressure+++GO:0006940///regulation of smooth muscle contraction+++GO:0007204///positive regulation of cytosolic calcium ion concentration+++GO:0007218///neuropeptide signaling pathway+++GO:0009648///photoperiodism+++GO:0010460///positive regulation of heart rate…	biological_process	multicellular organismal process+++biological regulation+++localization+++regulation of biological process+++cellular process+++response to stimulus+++signaling+++positive regulation of biological process+++behavior+++rhythmic process+++negative regulation of biological process	0.474798	0.000133184	0.000805788
ion transport
Gene ID	Gene Symbol	Type	GO_P Term	GO_P Term Level1	GO_P Term Level2	log2 (SMIR_SCDH / Con_SCDH)	Pvalue(SMIR_SCDH / Con_SCDH)	Qvalue (SMIR_SCDH / Con_SCDH)
140675	Gabra4	mRNA	GO:0006811///ion transport+++GO:0006821///chloride transport+++GO:0007165///signal transduction+++GO:0007214///gamma-aminobutyric acid signaling pathway+++GO:0007268///chemical synaptic transmission+++GO:0007417///central nervous system development+++GO:0034220///ion transmembrane transport+++GO:0042391///regulation of membrane potential+++GO:0050877///nervous system process+++GO:0051932///synapt…	biological_process	localization+++regulation of biological process+++response to stimulus+++signaling+++cellular process+++biological regulation+++developmental process+++multicellular organismal process	0.396447	1.13135e-06	1.03528e-05
140933	Trpc5	mRNA	GO:0006811///ion transport+++GO:0006828///manganese ion transport+++GO:0007204///positive regulation of cytosolic calcium ion concentration+++GO:0008284///positive regulation of cell proliferation+++GO:0010800///positive regulation of peptidyl-threonine phosphorylation+++GO:0030182///neuron differentiation+++GO:0045666///positive regulation of neuron differentiation+++GO:0045773///positive regula…	biological_process	localization+++cellular process+++biological regulation+++regulation of biological process+++cell proliferation+++positive regulation of biological process+++metabolic process+++developmental process+++multicellular organismal process+++growth+++cellular component organization or biogenesis+++negative regulation of biological process	0.453465	2.34286e-14	5.49567e-13
170840	Slc40a1	mRNA	GO:0001701///in utero embryonic development+++GO:0002260///lymphocyte homeostasis+++GO:0003158///endothelium development+++GO:0006811///ion transport+++GO:0006826///iron ion transport+++GO:0006829///zinc ion transport+++GO:0006879///cellular iron ion homeostasis+++GO:0030001///metal ion transport+++GO:0034395///regulation of transcription from RNA polymerase II promoter in response to iron+++GO:0…	biological_process	developmental process+++multicellular organismal process+++immune system process+++biological regulation+++localization+++cellular process+++metabolic process+++regulation of biological process+++response to stimulus+++negative regulation of biological process+++positive regulation of biological process	6.3157	5.28801e-11	9.01175e-10
171146	Kcnh5	mRNA	GO:0006811///ion transport+++GO:0006813///potassium ion transport+++GO:0010389///regulation of G2/M transition of mitotic cell cycle+++GO:0034765///regulation of ion transmembrane transport+++GO:0042391///regulation of membrane potential+++GO:0055085///transmembrane transport+++GO:0071805///potassium ion transmembrane transport	biological_process	localization+++regulation of biological process+++cellular process+++biological regulation	0.718552	6.62455e-11	1.11239e-09
24409	Grin2a	mRNA	GO:0001508///action potential+++GO:0001964///startle response+++GO:0001975///response to amphetamine+++GO:0006811///ion transport+++GO:0006816///calcium ion transport+++GO:0007268///chemical synaptic transmission+++GO:0007611///learning or memory+++GO:0007612///learning+++GO:0007613///memory+++GO:0008542///visual learning+++GO:0009416///response to light stimulus+++GO:0009611///response to woundi…	biological_process	biological regulation+++response to stimulus+++multicellular organismal process+++localization+++signaling+++cellular process+++behavior+++regulation of biological process+++positive regulation of biological process+++developmental process+++locomotion+++metabolic process+++negative regulation of biological process+++rhythmic process+++multi-organism process+++cellular component organization or b…	0.628588	7.28339e-30	5.25322e-28
24922	Gabrb3	mRNA	GO:0006811///ion transport+++GO:0006821///chloride transport+++GO:0007165///signal transduction+++GO:0007214///gamma-aminobutyric acid signaling pathway+++GO:0007268///chemical synaptic transmission+++GO:0007605///sensory perception of sound+++GO:0034220///ion transmembrane transport+++GO:0042391///regulation of membrane potential+++GO:0043523///regulation of neuron apoptotic process+++GO:0043524…	biological_process	localization+++regulation of biological process+++response to stimulus+++signaling+++cellular process+++biological regulation+++multicellular organismal process+++negative regulation of biological process+++developmental process+++cellular component organization or biogenesis	0.434045	5.44337e-17	1.58541e-15
24947	Gabra3	mRNA	GO:0006811///ion transport+++GO:0006821///chloride transport+++GO:0007165///signal transduction+++GO:0007214///gamma-aminobutyric acid signaling pathway+++GO:0007268///chemical synaptic transmission+++GO:0034220///ion transmembrane transport+++GO:0042391///regulation of membrane potential+++GO:0050877///nervous system process+++GO:0051932///synaptic transmission, GABAergic+++GO:0060078///regulati…	biological_process	localization+++regulation of biological process+++response to stimulus+++signaling+++cellular process+++biological regulation+++multicellular organismal process	0.326595	1.98376e-15	5.08998e-14
25399	Cacna2d1	mRNA	GO:0006811///ion transport+++GO:0006816///calcium ion transport+++GO:0034765///regulation of ion transmembrane transport+++GO:0051924///regulation of calcium ion transport+++GO:0060307///regulation of ventricular cardiac muscle cell membrane repolarization+++GO:0060402///calcium ion transport into cytosol+++GO:0061577///calcium ion transmembrane transport via high voltage-gated calcium channel+++…	biological_process	localization+++regulation of biological process+++biological regulation+++cellular process+++multicellular organismal process+++signaling+++positive regulation of biological process+++response to stimulus	0.351212	1.38993e-26	8.2943e-25
25743	Kcnj6	mRNA	GO:0006811///ion transport+++GO:0006813///potassium ion transport+++GO:0034220///ion transmembrane transport+++GO:0034765///regulation of ion transmembrane transport+++GO:0042403///thyroid hormone metabolic process+++GO:0051602///response to electrical stimulus+++GO:0071315///cellular response to morphine+++GO:0071805///potassium ion transmembrane transport+++GO:1990573///potassium ion import acr…	biological_process	localization+++regulation of biological process+++biological regulation+++metabolic process+++cellular process+++response to stimulus	0.456512	1.0163e-38	1.13528e-36
25749	Clcn5	mRNA	GO:0006811///ion transport+++GO:0006821///chloride transport+++GO:0006897///endocytosis+++GO:0055085///transmembrane transport+++GO:1902476///chloride transmembrane transport+++GO:1902600///proton transmembrane transport	biological_process	localization	0.568656	1.4562e-08	1.81727e-07
257648	Cacna1b	mRNA	GO:0001956///positive regulation of neurotransmitter secretion+++GO:0006811///ion transport+++GO:0006816///calcium ion transport+++GO:0007268///chemical synaptic transmission+++GO:0007269///neurotransmitter secretion+++GO:0007626///locomotory behavior+++GO:0008016///regulation of heart contraction+++GO:0008217///regulation of blood pressure+++GO:0014070///response to organic cyclic compound+++GO:…	biological_process	regulation of biological process+++localization+++signaling+++positive regulation of biological process+++cellular process+++biological regulation+++behavior+++multicellular organismal process+++response to stimulus	0.341829	3.62085e-30	2.66401e-28
259273	Kcnq5	mRNA	GO:0006811///ion transport+++GO:0006813///potassium ion transport+++GO:0055085///transmembrane transport+++GO:0071805///potassium ion transmembrane transport	biological_process	localization+++cellular process	0.407905	1.40407e-08	1.7546e-07
266998	Slc13a5	mRNA	GO:0006811///ion transport+++GO:0006814///sodium ion transport+++GO:0006842///tricarboxylic acid transport+++GO:0015744///succinate transport+++GO:0015746///citrate transport+++GO:0035674///tricarboxylic acid transmembrane transport+++GO:0055085///transmembrane transport+++GO:0071422///succinate transmembrane transport+++GO:0098656///anion transmembrane transport+++GO:1903825///organic acid trans…	biological_process	localization+++response to stimulus	0.368601	1.30043e-07	1.41472e-06
29559	Grik1	mRNA	GO:0006811///ion transport+++GO:0007268///chemical synaptic transmission+++GO:0007399///nervous system development+++GO:0014054///positive regulation of gamma-aminobutyric acid secretion+++GO:0030534///adult behavior+++GO:0032229///negative regulation of synaptic transmission, GABAergic+++GO:0032230///positive regulation of synaptic transmission, GABAergic+++GO:0034220///ion transmembrane transpo…	biological_process	localization+++signaling+++cellular process+++developmental process+++multicellular organismal process+++regulation of biological process+++positive regulation of biological process+++biological regulation+++behavior+++negative regulation of biological process+++response to stimulus	0.339395	6.15367e-06	4.92079e-05
29710	Scn8a	mRNA	GO:0006811///ion transport+++GO:0006814///sodium ion transport+++GO:0007422///peripheral nervous system development+++GO:0007517///muscle organ development+++GO:0007605///sensory perception of sound+++GO:0007626///locomotory behavior+++GO:0007628///adult walking behavior+++GO:0008344///adult locomotory behavior+++GO:0009636///response to toxic substance+++GO:0019228///neuronal action potential+++…	biological_process	localization+++developmental process+++multicellular organismal process+++behavior+++response to stimulus+++signaling+++cellular process+++biological regulation+++regulation of biological process	0.403102	1.69409e-63	4.25146e-61
29717	Cacna1g	mRNA	GO:0001508///action potential+++GO:0002027///regulation of heart rate+++GO:0006811///ion transport+++GO:0006816///calcium ion transport+++GO:0007204///positive regulation of cytosolic calcium ion concentration+++GO:0007268///chemical synaptic transmission+++GO:0010045///response to nickel cation+++GO:0014824///artery smooth muscle contraction+++GO:0019228///neuronal action potential+++GO:0034220/…	biological_process	biological regulation+++regulation of biological process+++multicellular organismal process+++localization+++cellular process+++signaling+++response to stimulus+++positive regulation of biological process	0.358351	2.43869e-44	3.21416e-42
298521	Grik3	mRNA	GO:0006811///ion transport+++GO:0007196///adenylate cyclase-inhibiting G protein-coupled glutamate receptor signaling pathway+++GO:0007215///glutamate receptor signaling pathway+++GO:0007216///G protein-coupled glutamate receptor signaling pathway+++GO:0007268///chemical synaptic transmission+++GO:0034220///ion transmembrane transport+++GO:0035235///ionotropic glutamate receptor signaling pathway…	biological_process	localization+++regulation of biological process+++response to stimulus+++signaling+++cellular process+++biological regulation+++negative regulation of biological process	0.458586	2.00012e-08	2.44934e-07
315311	Slc4a8	mRNA	GO:0006811///ion transport+++GO:0006814///sodium ion transport+++GO:0006820///anion transport+++GO:0015701///bicarbonate transport+++GO:0035725///sodium ion transmembrane transport+++GO:0042391///regulation of membrane potential+++GO:0050804///modulation of chemical synaptic transmission+++GO:0051453///regulation of intracellular pH+++GO:1902476///chloride transmembrane transport+++GO:2000302///p…	biological_process	localization+++biological regulation+++regulation of biological process+++signaling+++cellular process+++positive regulation of biological process	0.413514	2.87135e-23	1.40275e-21
50592	Gria1	mRNA	GO:0001919///regulation of receptor recycling+++GO:0006811///ion transport+++GO:0007268///chemical synaptic transmission+++GO:0007616///long-term memory+++GO:0009636///response to toxic substance+++GO:0010226///response to lithium ion+++GO:0014070///response to organic cyclic compound+++GO:0019228///neuronal action potential+++GO:0021510///spinal cord development+++GO:0031623///receptor internali…	biological_process	metabolic process+++regulation of biological process+++signaling+++cellular process+++biological regulation+++localization+++behavior+++multicellular organismal process+++response to stimulus+++developmental process+++positive regulation of biological process+++negative regulation of biological process	0.388484	5.20056e-16	1.38279e-14
54234	Cacna1e	mRNA	GO:0001662///behavioral fear response+++GO:0002027///regulation of heart rate+++GO:0006811///ion transport+++GO:0006816///calcium ion transport+++GO:0007268///chemical synaptic transmission+++GO:0007626///locomotory behavior+++GO:0008542///visual learning+++GO:0019226///transmission of nerve impulse+++GO:0019233///sensory perception of pain+++GO:0030317///flagellated sperm motility+++GO:0034765//…	biological_process	behavior+++response to stimulus+++multicellular organismal process+++regulation of biological process+++biological regulation+++localization+++signaling+++cellular process+++locomotion	0.407799	5.82902e-74	1.94159e-71
56817	Kcnip2	mRNA	GO:0006811///ion transport+++GO:0006813///potassium ion transport+++GO:0034765///regulation of ion transmembrane transport+++GO:0045163///clustering of voltage-gated potassium channels+++GO:0071805///potassium ion transmembrane transport+++GO:0086009///membrane repolarization+++GO:0097623///potassium ion export across plasma membrane+++GO:1901379///regulation of potassium ion transmembrane transp…	biological_process	localization+++regulation of biological process+++biological regulation+++developmental process+++multicellular organismal process+++cellular process+++cellular component organization or biogenesis+++positive regulation of biological process	0.521689	1.21861e-21	5.29025e-20
56827	Cacna1i	mRNA	GO:0006811///ion transport+++GO:0006816///calcium ion transport+++GO:0019228///neuronal action potential+++GO:0030317///flagellated sperm motility+++GO:0030431///sleep+++GO:0034765///regulation of ion transmembrane transport+++GO:0035725///sodium ion transmembrane transport+++GO:0042391///regulation of membrane potential+++GO:0045956///positive regulation of calcium ion-dependent exocytosis+++GO:…	biological_process	localization+++signaling+++cellular process+++multicellular organismal process+++biological regulation+++locomotion+++regulation of biological process+++positive regulation of biological process	0.359242	7.03611e-19	2.45527e-17
64846	Slc13a3	mRNA	GO:0006811///ion transport+++GO:0006814///sodium ion transport+++GO:0006835///dicarboxylic acid transport+++GO:0015742///alpha-ketoglutarate transport+++GO:0015744///succinate transport+++GO:0015746///citrate transport+++GO:0015810///aspartate transmembrane transport+++GO:0034775///glutathione transmembrane transport+++GO:0055085///transmembrane transport+++GO:0070778///L-aspartate transmembrane …	biological_process	localization+++response to stimulus	0.329539	6.41267e-25	3.56e-23
83731	Kcnma1	mRNA	GO:0001666///response to hypoxia+++GO:0006811///ion transport+++GO:0006813///potassium ion transport+++GO:0006970///response to osmotic stress+++GO:0007268///chemical synaptic transmission+++GO:0007568///aging+++GO:0007605///sensory perception of sound+++GO:0007623///circadian rhythm+++GO:0007628///adult walking behavior+++GO:0009268///response to pH+++GO:0019228///neuronal action potential+++GO:…	biological_process	response to stimulus+++localization+++signaling+++cellular process+++developmental process+++multicellular organismal process+++rhythmic process+++behavior+++biological regulation+++metabolic process+++regulation of biological process+++positive regulation of biological process+++cellular component organization or biogenesis+++negative regulation of biological process	0.348082	3.89481e-10	5.99101e-09
nitric oxide mediated signal transduction
Gene ID	Gene Symbol	Type	GO_P Term	GO_P Term Level1	GO_P Term Level2	log2 (SMIR_SCDH / Con_SCDH)	Pvalue(SMIR_SCDH / Con_SCDH)	Qvalue (SMIR_SCDH / Con_SCDH)
24567	Mt1	mRNA	GO:0006875///cellular metal ion homeostasis+++GO:0006882///cellular zinc ion homeostasis+++GO:0007263///nitric oxide mediated signal transduction+++GO:0010043///response to zinc ion+++GO:0010273///detoxification of copper ion+++GO:0043524///negative regulation of neuron apoptotic process+++GO:0045926///negative regulation of growth+++GO:0046686///response to cadmium ion+++GO:0071247///cellular re…	biological_process	cellular process+++biological regulation+++regulation of biological process+++response to stimulus+++signaling+++detoxification+++negative regulation of biological process+++growth	0.56466	4.91778e-37	5.14822e-35
24598	Nos1	mRNA	GO:0001666///response to hypoxia+++GO:0002028///regulation of sodium ion transport+++GO:0006527///arginine catabolic process+++GO:0006809///nitric oxide biosynthetic process+++GO:0006936///muscle contraction+++GO:0006941///striated muscle contraction+++GO:0007263///nitric oxide mediated signal transduction+++GO:0007420///brain development+++GO:0007565///female pregnancy+++GO:0007568///aging+++GO:…	biological_process	response to stimulus+++regulation of biological process+++localization+++biological regulation+++metabolic process+++cellular process+++multicellular organismal process+++signaling+++developmental process+++reproduction+++reproductive process+++multi-organism process+++cell proliferation+++negative regulation of biological process+++positive regulation of biological process+++cellular component o…	0.442392	8.52029e-12	1.57828e-10
312401	Ndnf	mRNA	GO:0001525///angiogenesis+++GO:0001764///neuron migration+++GO:0002931///response to ischemia+++GO:0007263///nitric oxide mediated signal transduction+++GO:0010811///positive regulation of cell-substrate adhesion+++GO:0010976///positive regulation of neuron projection development+++GO:0019800///peptide cross-linking via chondroitin 4-sulfate glycosaminoglycan+++GO:0030198///extracellular matrix o…	biological_process	developmental process+++multicellular organismal process+++locomotion+++localization+++cellular process+++response to stimulus+++regulation of biological process+++signaling+++biological regulation+++biological adhesion+++positive regulation of biological process+++cellular component organization or biogenesis+++metabolic process+++negative regulation of biological process	0.406007	9.10144e-08	1.01546e-06
689415	Mt2A	mRNA	GO:0006882///cellular zinc ion homeostasis+++GO:0007263///nitric oxide mediated signal transduction+++GO:0009617///response to bacterium+++GO:0010273///detoxification of copper ion+++GO:0035690///cellular response to drug+++GO:0036016///cellular response to interleukin-3+++GO:0036018///cellular response to erythropoietin+++GO:0045926///negative regulation of growth+++GO:0048143///astrocyte activa…	biological_process	cellular process+++biological regulation+++regulation of biological process+++response to stimulus+++signaling+++multi-organism process+++detoxification+++negative regulation of biological process+++growth+++developmental process+++multicellular organismal process	0.384554	1.78284e-34	1.65795e-32
response to morphine
Gene ID	Gene Symbol	Type	GO_P Term	GO_P Term Level1	GO_P Term Level2	log2 (SMIR_SCDH / Con_SCDH)	Pvalue(SMIR_SCDH / Con_SCDH)	Qvalue (SMIR_SCDH / Con_SCDH)
100360880	Fosb	mRNA	GO:0006355///regulation of transcription, DNA-templated+++GO:0006357///regulation of transcription by RNA polymerase II+++GO:0006366///transcription by RNA polymerase II+++GO:0007565///female pregnancy+++GO:0009612///response to mechanical stimulus+++GO:0032570///response to progesterone+++GO:0032870///cellular response to hormone stimulus+++GO:0042493///response to drug+++GO:0043278///response t…	biological_process	metabolic process+++regulation of biological process+++cellular process+++biological regulation+++reproduction+++reproductive process+++multicellular organismal process+++multi-organism process+++response to stimulus+++positive regulation of biological process	0.635464	6.09032e-05	0.000398481
24807	Tacr1	mRNA	GO:0002118///aggressive behavior+++GO:0002526///acute inflammatory response+++GO:0002687///positive regulation of leukocyte migration+++GO:0003051///angiotensin-mediated drinking behavior+++GO:0007165///signal transduction+++GO:0007186///G protein-coupled receptor signaling pathway+++GO:0007204///positive regulation of cytosolic calcium ion concentration+++GO:0007217///tachykinin receptor signali…	biological_process	behavior+++multi-organism process+++response to stimulus+++regulation of biological process+++immune system process+++locomotion+++localization+++cellular process+++positive regulation of biological process+++biological regulation+++multicellular organismal process+++signaling+++reproduction+++reproductive process+++cell proliferation+++cellular component organization or biogenesis	0.358199	4.73447e-11	8.12892e-10
25204	Pcsk1	mRNA	GO:0006508///proteolysis+++GO:0006897///endocytosis+++GO:0006955///immune response+++GO:0009749///response to glucose+++GO:0010035///response to inorganic substance+++GO:0010157///response to chlorate+++GO:0014070///response to organic cyclic compound+++GO:0016485///protein processing+++GO:0016486///peptide hormone processing+++GO:0016540///protein autoprocessing+++GO:0021983///pituitary gland de…	biological_process	metabolic process+++localization+++immune system process+++response to stimulus+++cellular process+++biological regulation+++developmental process+++multicellular organismal process+++multi-organism process+++regulation of biological process+++positive regulation of biological process	0.471641	8.55489e-06	6.67201e-05
25248	Cnr1	mRNA	GO:0002866///positive regulation of acute inflammatory response to antigenic stimulus+++GO:0007186///G protein-coupled receptor signaling pathway+++GO:0007188///adenylate cyclase-modulating G protein-coupled receptor signaling pathway+++GO:0007189///adenylate cyclase-activating G protein-coupled receptor signaling pathway+++GO:0007283///spermatogenesis+++GO:0007413///axonal fasciculation+++GO:000…	biological_process	regulation of biological process+++immune system process+++response to stimulus+++positive regulation of biological process+++biological regulation+++signaling+++cellular process+++reproduction+++reproductive process+++multicellular organismal process+++multi-organism process+++developmental process+++cellular component organization or biogenesis+++behavior+++negative regulation of biological pro…	0.333786	1.44623e-22	6.70758e-21
25601	Oprm1	mRNA	GO:0002438///acute inflammatory response to antigenic stimulus+++GO:0006955///immune response+++GO:0007165///signal transduction+++GO:0007186///G protein-coupled receptor signaling pathway+++GO:0007191///adenylate cyclase-activating dopamine receptor signaling pathway+++GO:0007193///adenylate cyclase-inhibiting G protein-coupled receptor signaling pathway+++GO:0007197///adenylate cyclase-inhibiti…	biological_process	immune system process+++response to stimulus+++regulation of biological process+++signaling+++cellular process+++biological regulation+++behavior+++multicellular organismal process+++positive regulation of biological process+++multi-organism process+++negative regulation of biological process+++reproduction+++reproductive process+++rhythmic process+++metabolic process+++developmental process+++lo…	0.711031	4.77201e-07	4.68506e-06
29191	Tac3	mRNA	GO:0007217///tachykinin receptor signaling pathway+++GO:0007218///neuropeptide signaling pathway+++GO:0043278///response to morphine+++GO:0045777///positive regulation of blood pressure+++GO:1902093///positive regulation of flagellated sperm motility	biological_process	regulation of biological process+++response to stimulus+++signaling+++cellular process+++biological regulation+++multicellular organismal process+++locomotion+++localization+++positive regulation of biological process	0.352619	1.74408e-15	4.49388e-14
29335	Oprk1	mRNA	GO:0006955///immune response+++GO:0007165///signal transduction+++GO:0007186///G protein-coupled receptor signaling pathway+++GO:0007200///phospholipase C-activating G protein-coupled receptor signaling pathway+++GO:0007218///neuropeptide signaling pathway+++GO:0007610///behavior+++GO:0007626///locomotory behavior+++GO:0009314///response to radiation+++GO:0010996///response to auditory stimulus++…	biological_process	immune system process+++response to stimulus+++regulation of biological process+++signaling+++cellular process+++biological regulation+++behavior+++multicellular organismal process+++localization+++positive regulation of biological process+++negative regulation of biological process+++locomotion+++reproduction+++reproductive process+++rhythmic process+++multi-organism process+++metabolic process	0.387418	4.81282e-06	3.93444e-05
clustering of voltage-gated potassium channels
Gene ID	Gene Symbol	Type	GO_P Term	GO_P Term Level1	GO_P Term Level2	log2 (SMIR_SCDH / Con_SCDH)	Pvalue(SMIR_SCDH / Con_SCDH)	Qvalue (SMIR_SCDH / Con_SCDH)
171026	Akap5	mRNA	GO:0001934///positive regulation of protein phosphorylation+++GO:0006605///protein targeting+++GO:0007165///signal transduction+++GO:0007193///adenylate cyclase-inhibiting G protein-coupled receptor signaling pathway+++GO:0007194///negative regulation of adenylate cyclase activity+++GO:0010524///positive regulation of calcium ion transport into cytosol+++GO:0010738///regulation of protein kinase …	biological_process	metabolic process+++regulation of biological process+++positive regulation of biological process+++cellular process+++biological regulation+++localization+++response to stimulus+++signaling+++developmental process+++multicellular organismal process+++negative regulation of biological process+++cellular component organization or biogenesis+++reproduction+++reproductive process+++multi-organism pro…	0.378537	5.33327e-06	4.32326e-05
500105	Cntnap2	mRNA	GO:0007612///learning+++GO:0021756///striatum development+++GO:0021761///limbic system development+++GO:0021794///thalamus development+++GO:0021987///cerebral cortex development+++GO:0030534///adult behavior+++GO:0031175///neuron projection development+++GO:0035176///social behavior+++GO:0042297///vocal learning+++GO:0045163///clustering of voltage-gated potassium channels+++GO:0048812///neuron p…	biological_process	behavior+++multicellular organismal process+++developmental process+++cellular process+++cellular component organization or biogenesis+++multi-organism process+++response to stimulus+++localization	0.357054	1.52221e-35	1.51559e-33
56817	Kcnip2	mRNA	GO:0006811///ion transport+++GO:0006813///potassium ion transport+++GO:0034765///regulation of ion transmembrane transport+++GO:0045163///clustering of voltage-gated potassium channels+++GO:0071805///potassium ion transmembrane transport+++GO:0086009///membrane repolarization+++GO:0097623///potassium ion export across plasma membrane+++GO:1901379///regulation of potassium ion transmembrane transp…	biological_process	localization+++regulation of biological process+++biological regulation+++developmental process+++multicellular organismal process+++cellular process+++cellular component organization or biogenesis+++positive regulation of biological process	0.521689	1.21861e-21	5.29025e-20
The top 10 mostly enriched molecular function of up-regulated DEGs
GO_F Term ID	GO_F Term Desc	GO_F Term Level1	GO_F Term Level2	Term Candidate Gene Num	Total Candidate Gene Num	Term Gene Num	Total Gene Num	Rich Ratio	P value	Q value
GO:0008066	glutamate receptor activity	molecular_function	molecular transducer activity	7	323	25	17015	0.28	2.9832e-07	0.000180185
GO:0005216	ion channel activity	molecular_function	transporter activity	16	323	196	17015	0.0816327	1.08791e-06	0.000328549
GO:0005245	voltage-gated calcium channel activity	molecular_function	transporter activity	7	323	39	17015	0.179487	7.59758e-06	0.00152965
GO:0008332	low voltage-gated calcium channel activity	molecular_function	transporter activity	3	323	4	17015	0.75	2.67321e-05	0.00379548
GO:1904315	transmitter-gated ion channel activity involved in regulation of postsynaptic membrane potential	molecular_function	molecular transducer activity	7	323	48	17015	0.145833	3.14195e-05	0.00379548
GO:0016595	glutamate binding	molecular_function	binding	4	323	14	17015	0.285714	0.000109775	0.0110507
GO:0099507	ligand-gated ion channel activity involved in regulation of presynaptic membrane potential	molecular_function	transporter activity	3	323	6	17015	0.5	0.000129921	0.0112103
GO:0097110	scaffold protein binding	molecular_function	binding	8	323	81	17015	0.0987654	0.000149309	0.0112728
GO:0005244	voltage-gated ion channel activity	molecular_function	transporter activity	10	323	132	17015	0.0757576	0.000213593	0.0137002
GO:0005515	protein binding	molecular_function	binding	54	323	1756	17015	0.0307517	0.000247135	0.0137002
glutamate receptor activity
Gene ID	Gene Symbol	Type	GO_F Term	GO_F Term Level1	GO_F Term Level2	log2 (SMIR_SCDH / Con_SCDH)	Pvalue(SMIR_SCDH / Con_SCDH)	Qvalue (SMIR_SCDH / Con_SCDH)
24409	Grin2a	mRNA	GO:0004970///ionotropic glutamate receptor activity+++GO:0004972///NMDA glutamate receptor activity+++GO:0005102///signaling receptor binding+++GO:0005216///ion channel activity+++GO:0005234///extracellularly glutamate-gated ion channel activity+++GO:0005261///cation channel activity+++GO:0005262///calcium channel activity+++GO:0005515///protein binding+++GO:0008066///glutamate receptor activity+…	molecular_function	molecular transducer activity+++transporter activity+++binding	0.628588	7.28339e-30	5.25322e-28
24418	Grm5	mRNA	GO:0001639///PLC activating G protein-coupled glutamate receptor activity+++GO:0004930///G protein-coupled receptor activity+++GO:0005515///protein binding+++GO:0005516///calmodulin binding+++GO:0008066///glutamate receptor activity+++GO:0030165///PDZ domain binding+++GO:0031687///A2A adenosine receptor binding+++GO:0042802///identical protein binding+++GO:0099530///G protein-coupled receptor act…	molecular_function	molecular transducer activity+++binding	0.479358	9.33452e-31	7.15516e-29
29559	Grik1	mRNA	GO:0004970///ionotropic glutamate receptor activity+++GO:0005216///ion channel activity+++GO:0005234///extracellularly glutamate-gated ion channel activity+++GO:0005515///protein binding+++GO:0008066///glutamate receptor activity+++GO:0008144///drug binding+++GO:0015276///ligand-gated ion channel activity+++GO:0015277///kainate selective glutamate receptor activity+++GO:0016595///glutamate bindin…	molecular_function	molecular transducer activity+++transporter activity+++binding	0.339395	6.15367e-06	4.92079e-05
298521	Grik3	mRNA	GO:0001640///adenylate cyclase inhibiting G protein-coupled glutamate receptor activity+++GO:0004970///ionotropic glutamate receptor activity+++GO:0005216///ion channel activity+++GO:0008066///glutamate receptor activity+++GO:0015276///ligand-gated ion channel activity+++GO:0015277///kainate selective glutamate receptor activity+++GO:0038023///signaling receptor activity+++GO:0099507///ligand-gat…	molecular_function	molecular transducer activity+++transporter activity	0.458586	2.00012e-08	2.44934e-07
50592	Gria1	mRNA	GO:0001540///amyloid-beta binding+++GO:0001965///G-protein alpha-subunit binding+++GO:0004970///ionotropic glutamate receptor activity+++GO:0004971///AMPA glutamate receptor activity+++GO:0005216///ion channel activity+++GO:0005515///protein binding+++GO:0008022///protein C-terminus binding+++GO:0008066///glutamate receptor activity+++GO:0008179///adenylate cyclase binding+++GO:0015276///ligand-g…	molecular_function	binding+++molecular transducer activity+++transporter activity	0.388484	5.20056e-16	1.38279e-14
60590	Grm8	mRNA	GO:0001642///group III metabotropic glutamate receptor activity+++GO:0004930///G protein-coupled receptor activity+++GO:0008066///glutamate receptor activity	molecular_function	molecular transducer activity	0.375067	6.43594e-05	0.000419148
81672	Grm7	mRNA	GO:0001640///adenylate cyclase inhibiting G protein-coupled glutamate receptor activity+++GO:0001642///group III metabotropic glutamate receptor activity+++GO:0004930///G protein-coupled receptor activity+++GO:0005245///voltage-gated calcium channel activity+++GO:0005246///calcium channel regulator activity+++GO:0005509///calcium ion binding+++GO:0005515///protein binding+++GO:0005516///calmoduli…	molecular_function	molecular transducer activity+++transporter activity+++molecular function regulator+++binding	0.39857	1.50406e-17	4.57713e-16
ion channel activity
Gene ID	Gene Symbol	Type	GO_F Term	GO_F Term Level1	GO_F Term Level2	log2 (SMIR_SCDH / Con_SCDH)	Pvalue(SMIR_SCDH / Con_SCDH)	Qvalue (SMIR_SCDH / Con_SCDH)
140675	Gabra4	mRNA	GO:0004888///transmembrane signaling receptor activity+++GO:0004890///GABA-A receptor activity+++GO:0005216///ion channel activity+++GO:0005230///extracellular ligand-gated ion channel activity+++GO:0005237///inhibitory extracellular ligand-gated ion channel activity+++GO:0005254///chloride channel activity+++GO:0008503///benzodiazepine receptor activity+++GO:0022851///GABA-gated chloride ion cha…	molecular_function	molecular transducer activity+++transporter activity	0.396447	1.13135e-06	1.03528e-05
140933	Trpc5	mRNA	GO:0003779///actin binding+++GO:0005216///ion channel activity+++GO:0005262///calcium channel activity+++GO:0005515///protein binding+++GO:0015279///store-operated calcium channel activity+++GO:0030276///clathrin binding+++GO:0042805///actinin binding+++GO:0051117///ATPase binding+++GO:0070679///inositol 1,4,5 trisphosphate binding	molecular_function	binding+++transporter activity	0.453465	2.34286e-14	5.49567e-13
171146	Kcnh5	mRNA	GO:0005216///ion channel activity+++GO:0005244///voltage-gated ion channel activity+++GO:0005249///voltage-gated potassium channel activity+++GO:0005267///potassium channel activity+++GO:0005516///calmodulin binding+++GO:0044325///ion channel binding+++GO:0044877///protein-containing complex binding	molecular_function	transporter activity+++binding	0.718552	6.62455e-11	1.11239e-09
24409	Grin2a	mRNA	GO:0004970///ionotropic glutamate receptor activity+++GO:0004972///NMDA glutamate receptor activity+++GO:0005102///signaling receptor binding+++GO:0005216///ion channel activity+++GO:0005234///extracellularly glutamate-gated ion channel activity+++GO:0005261///cation channel activity+++GO:0005262///calcium channel activity+++GO:0005515///protein binding+++GO:0008066///glutamate receptor activity+…	molecular_function	molecular transducer activity+++transporter activity+++binding	0.628588	7.28339e-30	5.25322e-28
24922	Gabrb3	mRNA	GO:0004888///transmembrane signaling receptor activity+++GO:0004890///GABA-A receptor activity+++GO:0005216///ion channel activity+++GO:0005230///extracellular ligand-gated ion channel activity+++GO:0005254///chloride channel activity+++GO:0005515///protein binding+++GO:0022851///GABA-gated chloride ion channel activity+++GO:0030594///neurotransmitter receptor activity+++GO:0035612///AP-2 adaptor…	molecular_function	molecular transducer activity+++transporter activity+++binding	0.434045	5.44337e-17	1.58541e-15
24947	Gabra3	mRNA	GO:0004888///transmembrane signaling receptor activity+++GO:0004890///GABA-A receptor activity+++GO:0005216///ion channel activity+++GO:0005230///extracellular ligand-gated ion channel activity+++GO:0005237///inhibitory extracellular ligand-gated ion channel activity+++GO:0005254///chloride channel activity+++GO:0005515///protein binding+++GO:0008503///benzodiazepine receptor activity+++GO:002285…	molecular_function	molecular transducer activity+++transporter activity+++binding	0.326595	1.98376e-15	5.08998e-14
257648	Cacna1b	mRNA	GO:0000166///nucleotide binding+++GO:0005216///ion channel activity+++GO:0005244///voltage-gated ion channel activity+++GO:0005245///voltage-gated calcium channel activity+++GO:0005262///calcium channel activity+++GO:0005509///calcium ion binding+++GO:0005515///protein binding+++GO:0005524///ATP binding+++GO:0008022///protein C-terminus binding+++GO:0008331///high voltage-gated calcium channel ac…	molecular_function	binding+++transporter activity	0.341829	3.62085e-30	2.66401e-28
259273	Kcnq5	mRNA	GO:0005216///ion channel activity+++GO:0005249///voltage-gated potassium channel activity+++GO:0005251///delayed rectifier potassium channel activity+++GO:0005516///calmodulin binding	molecular_function	transporter activity+++binding	0.407905	1.40407e-08	1.7546e-07
29559	Grik1	mRNA	GO:0004970///ionotropic glutamate receptor activity+++GO:0005216///ion channel activity+++GO:0005234///extracellularly glutamate-gated ion channel activity+++GO:0005515///protein binding+++GO:0008066///glutamate receptor activity+++GO:0008144///drug binding+++GO:0015276///ligand-gated ion channel activity+++GO:0015277///kainate selective glutamate receptor activity+++GO:0016595///glutamate bindin…	molecular_function	molecular transducer activity+++transporter activity+++binding	0.339395	6.15367e-06	4.92079e-05
29710	Scn8a	mRNA	GO:0000166///nucleotide binding+++GO:0005216///ion channel activity+++GO:0005244///voltage-gated ion channel activity+++GO:0005248///voltage-gated sodium channel activity+++GO:0005261///cation channel activity+++GO:0005272///sodium channel activity+++GO:0005515///protein binding+++GO:0005524///ATP binding+++GO:0031402///sodium ion binding	molecular_function	binding+++transporter activity	0.403102	1.69409e-63	4.25146e-61
29717	Cacna1g	mRNA	GO:0005216///ion channel activity+++GO:0005244///voltage-gated ion channel activity+++GO:0005245///voltage-gated calcium channel activity+++GO:0005248///voltage-gated sodium channel activity+++GO:0005261///cation channel activity+++GO:0005262///calcium channel activity+++GO:0008332///low voltage-gated calcium channel activity+++GO:0086056///voltage-gated calcium channel activity involved in AV no…	molecular_function	transporter activity+++binding	0.358351	2.43869e-44	3.21416e-42
298521	Grik3	mRNA	GO:0001640///adenylate cyclase inhibiting G protein-coupled glutamate receptor activity+++GO:0004970///ionotropic glutamate receptor activity+++GO:0005216///ion channel activity+++GO:0008066///glutamate receptor activity+++GO:0015276///ligand-gated ion channel activity+++GO:0015277///kainate selective glutamate receptor activity+++GO:0038023///signaling receptor activity+++GO:0099507///ligand-gat…	molecular_function	molecular transducer activity+++transporter activity	0.458586	2.00012e-08	2.44934e-07
50592	Gria1	mRNA	GO:0001540///amyloid-beta binding+++GO:0001965///G-protein alpha-subunit binding+++GO:0004970///ionotropic glutamate receptor activity+++GO:0004971///AMPA glutamate receptor activity+++GO:0005216///ion channel activity+++GO:0005515///protein binding+++GO:0008022///protein C-terminus binding+++GO:0008066///glutamate receptor activity+++GO:0008179///adenylate cyclase binding+++GO:0015276///ligand-g…	molecular_function	binding+++molecular transducer activity+++transporter activity	0.388484	5.20056e-16	1.38279e-14
54234	Cacna1e	mRNA	GO:0005216///ion channel activity+++GO:0005244///voltage-gated ion channel activity+++GO:0005245///voltage-gated calcium channel activity+++GO:0005262///calcium channel activity+++GO:0005509///calcium ion binding+++GO:0005515///protein binding+++GO:0008332///low voltage-gated calcium channel activity+++GO:0022843///voltage-gated cation channel activity+++GO:0046872///metal ion binding+++GO:004748…	molecular_function	transporter activity+++binding	0.407799	5.82902e-74	1.94159e-71
56827	Cacna1i	mRNA	GO:0005216///ion channel activity+++GO:0005244///voltage-gated ion channel activity+++GO:0005245///voltage-gated calcium channel activity+++GO:0005248///voltage-gated sodium channel activity+++GO:0005261///cation channel activity+++GO:0005262///calcium channel activity+++GO:0008332///low voltage-gated calcium channel activity	molecular_function	transporter activity	0.359242	7.03611e-19	2.45527e-17
83731	Kcnma1	mRNA	GO:0003779///actin binding+++GO:0005216///ion channel activity+++GO:0005244///voltage-gated ion channel activity+++GO:0005249///voltage-gated potassium channel activity+++GO:0005267///potassium channel activity+++GO:0005515///protein binding+++GO:0015269///calcium-activated potassium channel activity+++GO:0042802///identical protein binding+++GO:0044877///protein-containing complex binding+++GO:0…	molecular_function	binding+++transporter activity	0.348082	3.89481e-10	5.99101e-09
voltage-gated calcium channel activity
Gene ID	Gene Symbol	Type	GO_F Term	GO_F Term Level1	GO_F Term Level2	log2 (SMIR_SCDH / Con_SCDH)	Pvalue(SMIR_SCDH / Con_SCDH)	Qvalue (SMIR_SCDH / Con_SCDH)
25399	Cacna2d1	mRNA	GO:0005244///voltage-gated ion channel activity+++GO:0005245///voltage-gated calcium channel activity+++GO:0005262///calcium channel activity+++GO:0005515///protein binding+++GO:0046872///metal ion binding+++GO:0086057///voltage-gated calcium channel activity involved in bundle of His cell action potential	molecular_function	transporter activity+++binding	0.351212	1.38993e-26	8.2943e-25
25601	Oprm1	mRNA	GO:0001965///G-protein alpha-subunit binding+++GO:0004930///G protein-coupled receptor activity+++GO:0004979///beta-endorphin receptor activity+++GO:0004985///opioid receptor activity+++GO:0005245///voltage-gated calcium channel activity+++GO:0005515///protein binding+++GO:0008022///protein C-terminus binding+++GO:0019904///protein domain specific binding+++GO:0031005///filamin binding+++GO:00316…	molecular_function	binding+++molecular transducer activity+++transporter activity	0.711031	4.77201e-07	4.68506e-06
257648	Cacna1b	mRNA	GO:0000166///nucleotide binding+++GO:0005216///ion channel activity+++GO:0005244///voltage-gated ion channel activity+++GO:0005245///voltage-gated calcium channel activity+++GO:0005262///calcium channel activity+++GO:0005509///calcium ion binding+++GO:0005515///protein binding+++GO:0005524///ATP binding+++GO:0008022///protein C-terminus binding+++GO:0008331///high voltage-gated calcium channel ac…	molecular_function	binding+++transporter activity	0.341829	3.62085e-30	2.66401e-28
29717	Cacna1g	mRNA	GO:0005216///ion channel activity+++GO:0005244///voltage-gated ion channel activity+++GO:0005245///voltage-gated calcium channel activity+++GO:0005248///voltage-gated sodium channel activity+++GO:0005261///cation channel activity+++GO:0005262///calcium channel activity+++GO:0008332///low voltage-gated calcium channel activity+++GO:0086056///voltage-gated calcium channel activity involved in AV no…	molecular_function	transporter activity+++binding	0.358351	2.43869e-44	3.21416e-42
54234	Cacna1e	mRNA	GO:0005216///ion channel activity+++GO:0005244///voltage-gated ion channel activity+++GO:0005245///voltage-gated calcium channel activity+++GO:0005262///calcium channel activity+++GO:0005509///calcium ion binding+++GO:0005515///protein binding+++GO:0008332///low voltage-gated calcium channel activity+++GO:0022843///voltage-gated cation channel activity+++GO:0046872///metal ion binding+++GO:004748…	molecular_function	transporter activity+++binding	0.407799	5.82902e-74	1.94159e-71
56827	Cacna1i	mRNA	GO:0005216///ion channel activity+++GO:0005244///voltage-gated ion channel activity+++GO:0005245///voltage-gated calcium channel activity+++GO:0005248///voltage-gated sodium channel activity+++GO:0005261///cation channel activity+++GO:0005262///calcium channel activity+++GO:0008332///low voltage-gated calcium channel activity	molecular_function	transporter activity	0.359242	7.03611e-19	2.45527e-17
81672	Grm7	mRNA	GO:0001640///adenylate cyclase inhibiting G protein-coupled glutamate receptor activity+++GO:0001642///group III metabotropic glutamate receptor activity+++GO:0004930///G protein-coupled receptor activity+++GO:0005245///voltage-gated calcium channel activity+++GO:0005246///calcium channel regulator activity+++GO:0005509///calcium ion binding+++GO:0005515///protein binding+++GO:0005516///calmoduli…	molecular_function	molecular transducer activity+++transporter activity+++molecular function regulator+++binding	0.39857	1.50406e-17	4.57713e-16
low voltage-gated calcium channel activity
Gene ID	Gene Symbol	Type	GO_F Term	GO_F Term Level1	GO_F Term Level2	log2 (SMIR_SCDH / Con_SCDH)	Pvalue(SMIR_SCDH / Con_SCDH)	Qvalue (SMIR_SCDH / Con_SCDH)
29717	Cacna1g	mRNA	GO:0005216///ion channel activity+++GO:0005244///voltage-gated ion channel activity+++GO:0005245///voltage-gated calcium channel activity+++GO:0005248///voltage-gated sodium channel activity+++GO:0005261///cation channel activity+++GO:0005262///calcium channel activity+++GO:0008332///low voltage-gated calcium channel activity+++GO:0086056///voltage-gated calcium channel activity involved in AV no…	molecular_function	transporter activity+++binding	0.358351	2.43869e-44	3.21416e-42
54234	Cacna1e	mRNA	GO:0005216///ion channel activity+++GO:0005244///voltage-gated ion channel activity+++GO:0005245///voltage-gated calcium channel activity+++GO:0005262///calcium channel activity+++GO:0005509///calcium ion binding+++GO:0005515///protein binding+++GO:0008332///low voltage-gated calcium channel activity+++GO:0022843///voltage-gated cation channel activity+++GO:0046872///metal ion binding+++GO:004748…	molecular_function	transporter activity+++binding	0.407799	5.82902e-74	1.94159e-71
56827	Cacna1i	mRNA	GO:0005216///ion channel activity+++GO:0005244///voltage-gated ion channel activity+++GO:0005245///voltage-gated calcium channel activity+++GO:0005248///voltage-gated sodium channel activity+++GO:0005261///cation channel activity+++GO:0005262///calcium channel activity+++GO:0008332///low voltage-gated calcium channel activity	molecular_function	transporter activity	0.359242	7.03611e-19	2.45527e-17
transmitter-gated ion channel activity involved in regulation of postsynaptic membrane potential
Gene ID	Gene Symbol	Type	GO_F Term	GO_F Term Level1	GO_F Term Level2	log2 (SMIR_SCDH / Con_SCDH)	Pvalue(SMIR_SCDH / Con_SCDH)	Qvalue (SMIR_SCDH / Con_SCDH)
140675	Gabra4	mRNA	GO:0004888///transmembrane signaling receptor activity+++GO:0004890///GABA-A receptor activity+++GO:0005216///ion channel activity+++GO:0005230///extracellular ligand-gated ion channel activity+++GO:0005237///inhibitory extracellular ligand-gated ion channel activity+++GO:0005254///chloride channel activity+++GO:0008503///benzodiazepine receptor activity+++GO:0022851///GABA-gated chloride ion cha…	molecular_function	molecular transducer activity+++transporter activity	0.396447	1.13135e-06	1.03528e-05
24409	Grin2a	mRNA	GO:0004970///ionotropic glutamate receptor activity+++GO:0004972///NMDA glutamate receptor activity+++GO:0005102///signaling receptor binding+++GO:0005216///ion channel activity+++GO:0005234///extracellularly glutamate-gated ion channel activity+++GO:0005261///cation channel activity+++GO:0005262///calcium channel activity+++GO:0005515///protein binding+++GO:0008066///glutamate receptor activity+…	molecular_function	molecular transducer activity+++transporter activity+++binding	0.628588	7.28339e-30	5.25322e-28
24922	Gabrb3	mRNA	GO:0004888///transmembrane signaling receptor activity+++GO:0004890///GABA-A receptor activity+++GO:0005216///ion channel activity+++GO:0005230///extracellular ligand-gated ion channel activity+++GO:0005254///chloride channel activity+++GO:0005515///protein binding+++GO:0022851///GABA-gated chloride ion channel activity+++GO:0030594///neurotransmitter receptor activity+++GO:0035612///AP-2 adaptor…	molecular_function	molecular transducer activity+++transporter activity+++binding	0.434045	5.44337e-17	1.58541e-15
24947	Gabra3	mRNA	GO:0004888///transmembrane signaling receptor activity+++GO:0004890///GABA-A receptor activity+++GO:0005216///ion channel activity+++GO:0005230///extracellular ligand-gated ion channel activity+++GO:0005237///inhibitory extracellular ligand-gated ion channel activity+++GO:0005254///chloride channel activity+++GO:0005515///protein binding+++GO:0008503///benzodiazepine receptor activity+++GO:002285…	molecular_function	molecular transducer activity+++transporter activity+++binding	0.326595	1.98376e-15	5.08998e-14
29559	Grik1	mRNA	GO:0004970///ionotropic glutamate receptor activity+++GO:0005216///ion channel activity+++GO:0005234///extracellularly glutamate-gated ion channel activity+++GO:0005515///protein binding+++GO:0008066///glutamate receptor activity+++GO:0008144///drug binding+++GO:0015276///ligand-gated ion channel activity+++GO:0015277///kainate selective glutamate receptor activity+++GO:0016595///glutamate bindin…	molecular_function	molecular transducer activity+++transporter activity+++binding	0.339395	6.15367e-06	4.92079e-05
298521	Grik3	mRNA	GO:0001640///adenylate cyclase inhibiting G protein-coupled glutamate receptor activity+++GO:0004970///ionotropic glutamate receptor activity+++GO:0005216///ion channel activity+++GO:0008066///glutamate receptor activity+++GO:0015276///ligand-gated ion channel activity+++GO:0015277///kainate selective glutamate receptor activity+++GO:0038023///signaling receptor activity+++GO:0099507///ligand-gat…	molecular_function	molecular transducer activity+++transporter activity	0.458586	2.00012e-08	2.44934e-07
50592	Gria1	mRNA	GO:0001540///amyloid-beta binding+++GO:0001965///G-protein alpha-subunit binding+++GO:0004970///ionotropic glutamate receptor activity+++GO:0004971///AMPA glutamate receptor activity+++GO:0005216///ion channel activity+++GO:0005515///protein binding+++GO:0008022///protein C-terminus binding+++GO:0008066///glutamate receptor activity+++GO:0008179///adenylate cyclase binding+++GO:0015276///ligand-g…	molecular_function	binding+++molecular transducer activity+++transporter activity	0.388484	5.20056e-16	1.38279e-14
glutamate binding
Gene ID	Gene Symbol	Type	GO_F Term	GO_F Term Level1	GO_F Term Level2	log2 (SMIR_SCDH / Con_SCDH)	Pvalue(SMIR_SCDH / Con_SCDH)	Qvalue (SMIR_SCDH / Con_SCDH)
24380	Gad2	mRNA	GO:0003824///catalytic activity+++GO:0004351///glutamate decarboxylase activity+++GO:0016595///glutamate binding+++GO:0016829///lyase activity+++GO:0016831///carboxy-lyase activity+++GO:0030170///pyridoxal phosphate binding+++GO:0044877///protein-containing complex binding	molecular_function	catalytic activity+++binding	0.514204	1.14607e-24	6.26745e-23
24409	Grin2a	mRNA	GO:0004970///ionotropic glutamate receptor activity+++GO:0004972///NMDA glutamate receptor activity+++GO:0005102///signaling receptor binding+++GO:0005216///ion channel activity+++GO:0005234///extracellularly glutamate-gated ion channel activity+++GO:0005261///cation channel activity+++GO:0005262///calcium channel activity+++GO:0005515///protein binding+++GO:0008066///glutamate receptor activity+…	molecular_function	molecular transducer activity+++transporter activity+++binding	0.628588	7.28339e-30	5.25322e-28
29559	Grik1	mRNA	GO:0004970///ionotropic glutamate receptor activity+++GO:0005216///ion channel activity+++GO:0005234///extracellularly glutamate-gated ion channel activity+++GO:0005515///protein binding+++GO:0008066///glutamate receptor activity+++GO:0008144///drug binding+++GO:0015276///ligand-gated ion channel activity+++GO:0015277///kainate selective glutamate receptor activity+++GO:0016595///glutamate bindin…	molecular_function	molecular transducer activity+++transporter activity+++binding	0.339395	6.15367e-06	4.92079e-05
81672	Grm7	mRNA	GO:0001640///adenylate cyclase inhibiting G protein-coupled glutamate receptor activity+++GO:0001642///group III metabotropic glutamate receptor activity+++GO:0004930///G protein-coupled receptor activity+++GO:0005245///voltage-gated calcium channel activity+++GO:0005246///calcium channel regulator activity+++GO:0005509///calcium ion binding+++GO:0005515///protein binding+++GO:0005516///calmoduli…	molecular_function	molecular transducer activity+++transporter activity+++molecular function regulator+++binding	0.39857	1.50406e-17	4.57713e-16
ligand-gated ion channel activity involved in regulation of presynaptic membrane potential
Gene ID	Gene Symbol	Type	GO_F Term	GO_F Term Level1	GO_F Term Level2	log2 (SMIR_SCDH / Con_SCDH)	Pvalue(SMIR_SCDH / Con_SCDH)	Qvalue (SMIR_SCDH / Con_SCDH)
24409	Grin2a	mRNA	GO:0004970///ionotropic glutamate receptor activity+++GO:0004972///NMDA glutamate receptor activity+++GO:0005102///signaling receptor binding+++GO:0005216///ion channel activity+++GO:0005234///extracellularly glutamate-gated ion channel activity+++GO:0005261///cation channel activity+++GO:0005262///calcium channel activity+++GO:0005515///protein binding+++GO:0008066///glutamate receptor activity+…	molecular_function	molecular transducer activity+++transporter activity+++binding	0.628588	7.28339e-30	5.25322e-28
298521	Grik3	mRNA	GO:0001640///adenylate cyclase inhibiting G protein-coupled glutamate receptor activity+++GO:0004970///ionotropic glutamate receptor activity+++GO:0005216///ion channel activity+++GO:0008066///glutamate receptor activity+++GO:0015276///ligand-gated ion channel activity+++GO:0015277///kainate selective glutamate receptor activity+++GO:0038023///signaling receptor activity+++GO:0099507///ligand-gat…	molecular_function	molecular transducer activity+++transporter activity	0.458586	2.00012e-08	2.44934e-07
83731	Kcnma1	mRNA	GO:0003779///actin binding+++GO:0005216///ion channel activity+++GO:0005244///voltage-gated ion channel activity+++GO:0005249///voltage-gated potassium channel activity+++GO:0005267///potassium channel activity+++GO:0005515///protein binding+++GO:0015269///calcium-activated potassium channel activity+++GO:0042802///identical protein binding+++GO:0044877///protein-containing complex binding+++GO:0…	molecular_function	binding+++transporter activity	0.348082	3.89481e-10	5.99101e-09
scaffold protein binding
Gene ID	Gene Symbol	Type	GO_F Term	GO_F Term Level1	GO_F Term Level2	log2 (SMIR_SCDH / Con_SCDH)	Pvalue(SMIR_SCDH / Con_SCDH)	Qvalue (SMIR_SCDH / Con_SCDH)
100910771	LOC100910771	mRNA	GO:0000287///magnesium ion binding+++GO:0004672///protein kinase activity+++GO:0004674///protein serine/threonine kinase activity+++GO:0004708///MAP kinase kinase activity+++GO:0004709///MAP kinase kinase kinase activity+++GO:0005524///ATP binding+++GO:0030971///receptor tyrosine kinase binding+++GO:0042802///identical protein binding+++GO:0097110///scaffold protein binding	molecular_function	binding+++catalytic activity	0.695517	2.35217e-07	2.45397e-06
100911597	Myh9l1	mRNA	GO:0000146///microfilament motor activity+++GO:0000166///nucleotide binding+++GO:0001965///G-protein alpha-subunit binding+++GO:0003774///motor activity+++GO:0003779///actin binding+++GO:0005178///integrin binding+++GO:0005391///sodium:potassium-exchanging ATPase activity+++GO:0005515///protein binding+++GO:0005516///calmodulin binding+++GO:0005524///ATP binding+++GO:0016887///ATPase activity+++G…	molecular_function	catalytic activity+++binding+++transporter activity	0.444082	9.80581e-23	4.66604e-21
103690175	LOC103690175	mRNA	GO:0001227///DNA-binding transcription repressor activity, RNA polymerase II-specific+++GO:0015631///tubulin binding+++GO:0019899///enzyme binding+++GO:0042393///histone binding+++GO:0042826///histone deacetylase binding+++GO:0043021///ribonucleoprotein complex binding+++GO:0043565///sequence-specific DNA binding+++GO:0046872///metal ion binding+++GO:0051219///phosphoprotein binding+++GO:0097110/…	molecular_function	transcription regulator activity+++binding	7.50877	8.45465e-22	3.69664e-20
171026	Akap5	mRNA	GO:0001664///G protein-coupled receptor binding+++GO:0003779///actin binding+++GO:0005515///protein binding+++GO:0005516///calmodulin binding+++GO:0008179///adenylate cyclase binding+++GO:0017124///SH3 domain binding+++GO:0019900///kinase binding+++GO:0019901///protein kinase binding+++GO:0019904///protein domain specific binding+++GO:0030346///protein phosphatase 2B binding+++GO:0031698///beta-2…	molecular_function	binding	0.378537	5.33327e-06	4.32326e-05
24409	Grin2a	mRNA	GO:0004970///ionotropic glutamate receptor activity+++GO:0004972///NMDA glutamate receptor activity+++GO:0005102///signaling receptor binding+++GO:0005216///ion channel activity+++GO:0005234///extracellularly glutamate-gated ion channel activity+++GO:0005261///cation channel activity+++GO:0005262///calcium channel activity+++GO:0005515///protein binding+++GO:0008066///glutamate receptor activity+…	molecular_function	molecular transducer activity+++transporter activity+++binding	0.628588	7.28339e-30	5.25322e-28
24598	Nos1	mRNA	GO:0003958///NADPH-hemoprotein reductase activity+++GO:0004517///nitric-oxide synthase activity+++GO:0005515///protein binding+++GO:0005516///calmodulin binding+++GO:0008270///zinc ion binding+++GO:0010181///FMN binding+++GO:0016491///oxidoreductase activity+++GO:0016709///oxidoreductase activity, acting on paired donors, with incorporation or reduction of molecular oxygen, NAD(P)H as one donor, …	molecular_function	catalytic activity+++binding+++molecular function regulator	0.442392	8.52029e-12	1.57828e-10
29717	Cacna1g	mRNA	GO:0005216///ion channel activity+++GO:0005244///voltage-gated ion channel activity+++GO:0005245///voltage-gated calcium channel activity+++GO:0005248///voltage-gated sodium channel activity+++GO:0005261///cation channel activity+++GO:0005262///calcium channel activity+++GO:0008332///low voltage-gated calcium channel activity+++GO:0086056///voltage-gated calcium channel activity involved in AV no…	molecular_function	transporter activity+++binding	0.358351	2.43869e-44	3.21416e-42
50592	Gria1	mRNA	GO:0001540///amyloid-beta binding+++GO:0001965///G-protein alpha-subunit binding+++GO:0004970///ionotropic glutamate receptor activity+++GO:0004971///AMPA glutamate receptor activity+++GO:0005216///ion channel activity+++GO:0005515///protein binding+++GO:0008022///protein C-terminus binding+++GO:0008066///glutamate receptor activity+++GO:0008179///adenylate cyclase binding+++GO:0015276///ligand-g…	molecular_function	binding+++molecular transducer activity+++transporter activity	0.388484	5.20056e-16	1.38279e-14
voltage-gated ion channel activity
Gene ID	Gene Symbol	Type	GO_F Term	GO_F Term Level1	GO_F Term Level2	log2 (SMIR_SCDH / Con_SCDH)	Pvalue(SMIR_SCDH / Con_SCDH)	Qvalue (SMIR_SCDH / Con_SCDH)
171146	Kcnh5	mRNA	GO:0005216///ion channel activity+++GO:0005244///voltage-gated ion channel activity+++GO:0005249///voltage-gated potassium channel activity+++GO:0005267///potassium channel activity+++GO:0005516///calmodulin binding+++GO:0044325///ion channel binding+++GO:0044877///protein-containing complex binding	molecular_function	transporter activity+++binding	0.718552	6.62455e-11	1.11239e-09
25399	Cacna2d1	mRNA	GO:0005244///voltage-gated ion channel activity+++GO:0005245///voltage-gated calcium channel activity+++GO:0005262///calcium channel activity+++GO:0005515///protein binding+++GO:0046872///metal ion binding+++GO:0086057///voltage-gated calcium channel activity involved in bundle of His cell action potential	molecular_function	transporter activity+++binding	0.351212	1.38993e-26	8.2943e-25
25743	Kcnj6	mRNA	GO:0001965///G-protein alpha-subunit binding+++GO:0005242///inward rectifier potassium channel activity+++GO:0005244///voltage-gated ion channel activity+++GO:0005515///protein binding+++GO:0015467///G-protein activated inward rectifier potassium channel activity	molecular_function	binding+++transporter activity	0.456512	1.0163e-38	1.13528e-36
257648	Cacna1b	mRNA	GO:0000166///nucleotide binding+++GO:0005216///ion channel activity+++GO:0005244///voltage-gated ion channel activity+++GO:0005245///voltage-gated calcium channel activity+++GO:0005262///calcium channel activity+++GO:0005509///calcium ion binding+++GO:0005515///protein binding+++GO:0005524///ATP binding+++GO:0008022///protein C-terminus binding+++GO:0008331///high voltage-gated calcium channel ac…	molecular_function	binding+++transporter activity	0.341829	3.62085e-30	2.66401e-28
29710	Scn8a	mRNA	GO:0000166///nucleotide binding+++GO:0005216///ion channel activity+++GO:0005244///voltage-gated ion channel activity+++GO:0005248///voltage-gated sodium channel activity+++GO:0005261///cation channel activity+++GO:0005272///sodium channel activity+++GO:0005515///protein binding+++GO:0005524///ATP binding+++GO:0031402///sodium ion binding	molecular_function	binding+++transporter activity	0.403102	1.69409e-63	4.25146e-61
29717	Cacna1g	mRNA	GO:0005216///ion channel activity+++GO:0005244///voltage-gated ion channel activity+++GO:0005245///voltage-gated calcium channel activity+++GO:0005248///voltage-gated sodium channel activity+++GO:0005261///cation channel activity+++GO:0005262///calcium channel activity+++GO:0008332///low voltage-gated calcium channel activity+++GO:0086056///voltage-gated calcium channel activity involved in AV no…	molecular_function	transporter activity+++binding	0.358351	2.43869e-44	3.21416e-42
54234	Cacna1e	mRNA	GO:0005216///ion channel activity+++GO:0005244///voltage-gated ion channel activity+++GO:0005245///voltage-gated calcium channel activity+++GO:0005262///calcium channel activity+++GO:0005509///calcium ion binding+++GO:0005515///protein binding+++GO:0008332///low voltage-gated calcium channel activity+++GO:0022843///voltage-gated cation channel activity+++GO:0046872///metal ion binding+++GO:004748…	molecular_function	transporter activity+++binding	0.407799	5.82902e-74	1.94159e-71
56817	Kcnip2	mRNA	GO:0005244///voltage-gated ion channel activity+++GO:0005250///A-type (transient outward) potassium channel activity+++GO:0005267///potassium channel activity+++GO:0005509///calcium ion binding+++GO:0005515///protein binding+++GO:0015459///potassium channel regulator activity+++GO:0042802///identical protein binding+++GO:0044325///ion channel binding+++GO:0044877///protein-containing complex bind…	molecular_function	transporter activity+++binding+++molecular function regulator	0.521689	1.21861e-21	5.29025e-20
56827	Cacna1i	mRNA	GO:0005216///ion channel activity+++GO:0005244///voltage-gated ion channel activity+++GO:0005245///voltage-gated calcium channel activity+++GO:0005248///voltage-gated sodium channel activity+++GO:0005261///cation channel activity+++GO:0005262///calcium channel activity+++GO:0008332///low voltage-gated calcium channel activity	molecular_function	transporter activity	0.359242	7.03611e-19	2.45527e-17
83731	Kcnma1	mRNA	GO:0003779///actin binding+++GO:0005216///ion channel activity+++GO:0005244///voltage-gated ion channel activity+++GO:0005249///voltage-gated potassium channel activity+++GO:0005267///potassium channel activity+++GO:0005515///protein binding+++GO:0015269///calcium-activated potassium channel activity+++GO:0042802///identical protein binding+++GO:0044877///protein-containing complex binding+++GO:0…	molecular_function	binding+++transporter activity	0.348082	3.89481e-10	5.99101e-09
protein binding
Gene ID	Gene Symbol	Type	GO_F Term	GO_F Term Level1	GO_F Term Level2	log2 (SMIR_SCDH / Con_SCDH)	Pvalue(SMIR_SCDH / Con_SCDH)	Qvalue (SMIR_SCDH / Con_SCDH)
100911581	Faah	mRNA	GO:0004040///amidase activity+++GO:0005515///protein binding+++GO:0005543///phospholipid binding+++GO:0008289///lipid binding+++GO:0016788///hydrolase activity, acting on ester bonds+++GO:0017064///fatty acid amide hydrolase activity+++GO:0042802///identical protein binding+++GO:0047372///acylglycerol lipase activity+++GO:0102077///oleamide hydrolase activity+++GO:0103073///anandamide amidohydrol…	molecular_function	catalytic activity+++binding	1.06674	2.66715e-09	3.71859e-08
100911597	Myh9l1	mRNA	GO:0000146///microfilament motor activity+++GO:0000166///nucleotide binding+++GO:0001965///G-protein alpha-subunit binding+++GO:0003774///motor activity+++GO:0003779///actin binding+++GO:0005178///integrin binding+++GO:0005391///sodium:potassium-exchanging ATPase activity+++GO:0005515///protein binding+++GO:0005516///calmodulin binding+++GO:0005524///ATP binding+++GO:0016887///ATPase activity+++G…	molecular_function	catalytic activity+++binding+++transporter activity	0.444082	9.80581e-23	4.66604e-21
102556337	LOC102556337	mRNA	GO:0005515///protein binding+++GO:0042803///protein homodimerization activity+++GO:0044877///protein-containing complex binding+++GO:0051020///GTPase binding	molecular_function	binding	0.530179	7.67346e-17	2.20687e-15
114851	Cdkn1a	mRNA	GO:0004860///protein kinase inhibitor activity+++GO:0004861///cyclin-dependent protein serine/threonine kinase inhibitor activity+++GO:0005515///protein binding+++GO:0016301///kinase activity+++GO:0019901///protein kinase binding+++GO:0019912///cyclin-dependent protein kinase activating kinase activity+++GO:0030332///cyclin binding+++GO:0031625///ubiquitin protein ligase binding+++GO:0044877///pr…	molecular_function	molecular function regulator+++binding+++catalytic activity	1.05742	2.66989e-127	2.32916e-124
115771	Usp2	mRNA	GO:0004843///thiol-dependent ubiquitin-specific protease activity+++GO:0005515///protein binding+++GO:0008233///peptidase activity+++GO:0008234///cysteine-type peptidase activity+++GO:0016787///hydrolase activity+++GO:0030332///cyclin binding+++GO:0031625///ubiquitin protein ligase binding+++GO:0036459///thiol-dependent ubiquitinyl hydrolase activity+++GO:0042802///identical protein binding+++GO:…	molecular_function	catalytic activity+++binding	0.449333	7.20225e-15	1.77108e-13
116671	Cdk5r1	mRNA	GO:0002020///protease binding+++GO:0003779///actin binding+++GO:0005509///calcium ion binding+++GO:0005515///protein binding+++GO:0016301///kinase activity+++GO:0019901///protein kinase binding+++GO:0035255///ionotropic glutamate receptor binding+++GO:0043539///protein serine/threonine kinase activator activity+++GO:0045296///cadherin binding+++GO:0046875///ephrin receptor binding+++GO:0051015///…	molecular_function	binding+++catalytic activity+++molecular function regulator	0.3564	1.59396e-11	2.87698e-10
116681	Dlgap2	mRNA	GO:0004385///guanylate kinase activity+++GO:0005515///protein binding+++GO:0019904///protein domain specific binding	molecular_function	catalytic activity+++binding	0.441925	1.27434e-06	1.15402e-05
140726	Cacng5	mRNA	GO:0005515///protein binding	molecular_function	binding	0.368064	1.19522e-09	1.73369e-08
140933	Trpc5	mRNA	GO:0003779///actin binding+++GO:0005216///ion channel activity+++GO:0005262///calcium channel activity+++GO:0005515///protein binding+++GO:0015279///store-operated calcium channel activity+++GO:0030276///clathrin binding+++GO:0042805///actinin binding+++GO:0051117///ATPase binding+++GO:0070679///inositol 1,4,5 trisphosphate binding	molecular_function	binding+++transporter activity	0.453465	2.34286e-14	5.49567e-13
171026	Akap5	mRNA	GO:0001664///G protein-coupled receptor binding+++GO:0003779///actin binding+++GO:0005515///protein binding+++GO:0005516///calmodulin binding+++GO:0008179///adenylate cyclase binding+++GO:0017124///SH3 domain binding+++GO:0019900///kinase binding+++GO:0019901///protein kinase binding+++GO:0019904///protein domain specific binding+++GO:0030346///protein phosphatase 2B binding+++GO:0031698///beta-2…	molecular_function	binding	0.378537	5.33327e-06	4.32326e-05
24208	Ar	mRNA	GO:0000976///transcription regulatory region sequence-specific DNA binding+++GO:0000978///RNA polymerase II proximal promoter sequence-specific DNA binding+++GO:0001085///RNA polymerase II transcription factor binding+++GO:0001091///RNA polymerase II basal transcription factor binding+++GO:0001228///DNA-binding transcription activator activity, RNA polymerase II-specific+++GO:0003677///DNA bindin…	molecular_function	binding+++transcription regulator activity+++molecular transducer activity	0.419482	5.80351e-05	0.000381898
24409	Grin2a	mRNA	GO:0004970///ionotropic glutamate receptor activity+++GO:0004972///NMDA glutamate receptor activity+++GO:0005102///signaling receptor binding+++GO:0005216///ion channel activity+++GO:0005234///extracellularly glutamate-gated ion channel activity+++GO:0005261///cation channel activity+++GO:0005262///calcium channel activity+++GO:0005515///protein binding+++GO:0008066///glutamate receptor activity+…	molecular_function	molecular transducer activity+++transporter activity+++binding	0.628588	7.28339e-30	5.25322e-28
24418	Grm5	mRNA	GO:0001639///PLC activating G protein-coupled glutamate receptor activity+++GO:0004930///G protein-coupled receptor activity+++GO:0005515///protein binding+++GO:0005516///calmodulin binding+++GO:0008066///glutamate receptor activity+++GO:0030165///PDZ domain binding+++GO:0031687///A2A adenosine receptor binding+++GO:0042802///identical protein binding+++GO:0099530///G protein-coupled receptor act…	molecular_function	molecular transducer activity+++binding	0.479358	9.33452e-31	7.15516e-29
245960	Alg10	mRNA	GO:0004583///dolichyl-phosphate-glucose-glycolipid alpha-glucosyltransferase activity+++GO:0005515///protein binding+++GO:0016740///transferase activity+++GO:0016757///transferase activity, transferring glycosyl groups+++GO:0106073///dolichyl pyrophosphate Glc2Man9GlcNAc2 alpha-1,2-glucosyltransferase activity	molecular_function	catalytic activity+++binding	0.476759	7.09783e-07	6.75492e-06
24598	Nos1	mRNA	GO:0003958///NADPH-hemoprotein reductase activity+++GO:0004517///nitric-oxide synthase activity+++GO:0005515///protein binding+++GO:0005516///calmodulin binding+++GO:0008270///zinc ion binding+++GO:0010181///FMN binding+++GO:0016491///oxidoreductase activity+++GO:0016709///oxidoreductase activity, acting on paired donors, with incorporation or reduction of molecular oxygen, NAD(P)H as one donor, …	molecular_function	catalytic activity+++binding+++molecular function regulator	0.442392	8.52029e-12	1.57828e-10
24922	Gabrb3	mRNA	GO:0004888///transmembrane signaling receptor activity+++GO:0004890///GABA-A receptor activity+++GO:0005216///ion channel activity+++GO:0005230///extracellular ligand-gated ion channel activity+++GO:0005254///chloride channel activity+++GO:0005515///protein binding+++GO:0022851///GABA-gated chloride ion channel activity+++GO:0030594///neurotransmitter receptor activity+++GO:0035612///AP-2 adaptor…	molecular_function	molecular transducer activity+++transporter activity+++binding	0.434045	5.44337e-17	1.58541e-15
24947	Gabra3	mRNA	GO:0004888///transmembrane signaling receptor activity+++GO:0004890///GABA-A receptor activity+++GO:0005216///ion channel activity+++GO:0005230///extracellular ligand-gated ion channel activity+++GO:0005237///inhibitory extracellular ligand-gated ion channel activity+++GO:0005254///chloride channel activity+++GO:0005515///protein binding+++GO:0008503///benzodiazepine receptor activity+++GO:002285…	molecular_function	molecular transducer activity+++transporter activity+++binding	0.326595	1.98376e-15	5.08998e-14
25111	Chrm4	mRNA	GO:0004930///G protein-coupled receptor activity+++GO:0004993///G protein-coupled serotonin receptor activity+++GO:0005085///guanyl-nucleotide exchange factor activity+++GO:0005515///protein binding+++GO:0016907///G protein-coupled acetylcholine receptor activity+++GO:0030594///neurotransmitter receptor activity	molecular_function	molecular transducer activity+++binding+++molecular function regulator	0.495088	1.68394e-05	0.000124344
25113	Ddn	mRNA	GO:0000978///RNA polymerase II proximal promoter sequence-specific DNA binding+++GO:0000981///DNA-binding transcription factor activity, RNA polymerase II-specific+++GO:0005515///protein binding	molecular_function	binding+++transcription regulator activity	0.605023	9.21001e-05	0.000578229
25132	Myo5b	mRNA	GO:0000146///microfilament motor activity+++GO:0000166///nucleotide binding+++GO:0003774///motor activity+++GO:0003779///actin binding+++GO:0005515///protein binding+++GO:0005516///calmodulin binding+++GO:0005524///ATP binding+++GO:0016887///ATPase activity+++GO:0017137///Rab GTPase binding+++GO:0030898///actin-dependent ATPase activity+++GO:0035255///ionotropic glutamate receptor binding+++GO:00…	molecular_function	catalytic activity+++binding	0.378253	4.36308e-09	5.88166e-08
25245	Bdkrb2	mRNA	GO:0002020///protease binding+++GO:0004930///G protein-coupled receptor activity+++GO:0004947///bradykinin receptor activity+++GO:0005515///protein binding+++GO:0031698///beta-2 adrenergic receptor binding+++GO:0031702///type 1 angiotensin receptor binding+++GO:0046982///protein heterodimerization activity	molecular_function	binding+++molecular transducer activity	0.816689	6.12668e-05	0.000400574
25248	Cnr1	mRNA	GO:0004930///G protein-coupled receptor activity+++GO:0004949///cannabinoid receptor activity+++GO:0005515///protein binding+++GO:0008144///drug binding+++GO:0042802///identical protein binding+++GO:0099635///voltage-gated calcium channel activity involved in positive regulation of presynaptic cytosolic calcium levels	molecular_function	molecular transducer activity+++binding+++transporter activity	0.333786	1.44623e-22	6.70758e-21
25311	Dcc	mRNA	GO:0003713///transcription coactivator activity+++GO:0005042///netrin receptor activity+++GO:0005515///protein binding+++GO:0042802///identical protein binding	molecular_function	transcription regulator activity+++molecular transducer activity+++binding	0.342823	2.94541e-08	3.51302e-07
25399	Cacna2d1	mRNA	GO:0005244///voltage-gated ion channel activity+++GO:0005245///voltage-gated calcium channel activity+++GO:0005262///calcium channel activity+++GO:0005515///protein binding+++GO:0046872///metal ion binding+++GO:0086057///voltage-gated calcium channel activity involved in bundle of His cell action potential	molecular_function	transporter activity+++binding	0.351212	1.38993e-26	8.2943e-25
25400	Camk2a	mRNA	GO:0000166///nucleotide binding+++GO:0004672///protein kinase activity+++GO:0004674///protein serine/threonine kinase activity+++GO:0004683///calmodulin-dependent protein kinase activity+++GO:0005515///protein binding+++GO:0005516///calmodulin binding+++GO:0005524///ATP binding+++GO:0009931///calcium-dependent protein serine/threonine kinase activity+++GO:0016301///kinase activity+++GO:0016740///…	molecular_function	binding+++catalytic activity	0.347121	1.35563e-19	4.99701e-18
25601	Oprm1	mRNA	GO:0001965///G-protein alpha-subunit binding+++GO:0004930///G protein-coupled receptor activity+++GO:0004979///beta-endorphin receptor activity+++GO:0004985///opioid receptor activity+++GO:0005245///voltage-gated calcium channel activity+++GO:0005515///protein binding+++GO:0008022///protein C-terminus binding+++GO:0019904///protein domain specific binding+++GO:0031005///filamin binding+++GO:00316…	molecular_function	binding+++molecular transducer activity+++transporter activity	0.711031	4.77201e-07	4.68506e-06
25743	Kcnj6	mRNA	GO:0001965///G-protein alpha-subunit binding+++GO:0005242///inward rectifier potassium channel activity+++GO:0005244///voltage-gated ion channel activity+++GO:0005515///protein binding+++GO:0015467///G-protein activated inward rectifier potassium channel activity	molecular_function	binding+++transporter activity	0.456512	1.0163e-38	1.13528e-36
257648	Cacna1b	mRNA	GO:0000166///nucleotide binding+++GO:0005216///ion channel activity+++GO:0005244///voltage-gated ion channel activity+++GO:0005245///voltage-gated calcium channel activity+++GO:0005262///calcium channel activity+++GO:0005509///calcium ion binding+++GO:0005515///protein binding+++GO:0005524///ATP binding+++GO:0008022///protein C-terminus binding+++GO:0008331///high voltage-gated calcium channel ac…	molecular_function	binding+++transporter activity	0.341829	3.62085e-30	2.66401e-28
259269	Erc2	mRNA	GO:0005515///protein binding+++GO:0030165///PDZ domain binding+++GO:0044877///protein-containing complex binding+++GO:0098882///structural constituent of presynaptic active zone	molecular_function	binding+++structural molecule activity	0.347443	6.13072e-08	6.9891e-07
287422	Per1	mRNA	GO:0000976///transcription regulatory region sequence-specific DNA binding+++GO:0000978///RNA polymerase II proximal promoter sequence-specific DNA binding+++GO:0001222///transcription corepressor binding+++GO:0005515///protein binding+++GO:0008134///transcription factor binding+++GO:0019900///kinase binding+++GO:0031490///chromatin DNA binding+++GO:0031625///ubiquitin protein ligase binding+++GO…	molecular_function	binding	0.701604	4.51517e-105	2.75726e-102
29130	Syn3	mRNA	GO:0000166///nucleotide binding+++GO:0005515///protein binding+++GO:0005524///ATP binding	molecular_function	binding	0.415719	3.35452e-10	5.23465e-09
29190	Pdyn	mRNA	GO:0001515///opioid peptide activity+++GO:0005515///protein binding+++GO:0031628///opioid receptor binding	molecular_function	binding+++molecular function regulator	0.396801	7.52772e-15	1.84616e-13
29335	Oprk1	mRNA	GO:0004930///G protein-coupled receptor activity+++GO:0004985///opioid receptor activity+++GO:0005515///protein binding+++GO:0033612///receptor serine/threonine kinase binding+++GO:0038048///dynorphin receptor activity+++GO:0042277///peptide binding+++GO:0042923///neuropeptide binding	molecular_function	molecular transducer activity+++binding	0.387418	4.81282e-06	3.93444e-05
29559	Grik1	mRNA	GO:0004970///ionotropic glutamate receptor activity+++GO:0005216///ion channel activity+++GO:0005234///extracellularly glutamate-gated ion channel activity+++GO:0005515///protein binding+++GO:0008066///glutamate receptor activity+++GO:0008144///drug binding+++GO:0015276///ligand-gated ion channel activity+++GO:0015277///kainate selective glutamate receptor activity+++GO:0016595///glutamate bindin…	molecular_function	molecular transducer activity+++transporter activity+++binding	0.339395	6.15367e-06	4.92079e-05
29647	Cask	mRNA	GO:0000166///nucleotide binding+++GO:0004672///protein kinase activity+++GO:0004674///protein serine/threonine kinase activity+++GO:0005515///protein binding+++GO:0005516///calmodulin binding+++GO:0005524///ATP binding+++GO:0008022///protein C-terminus binding+++GO:0016301///kinase activity+++GO:0016740///transferase activity+++GO:0030165///PDZ domain binding+++GO:0042043///neurexin family protei…	molecular_function	binding+++catalytic activity	0.322415	2.99834e-08	3.56454e-07
29710	Scn8a	mRNA	GO:0000166///nucleotide binding+++GO:0005216///ion channel activity+++GO:0005244///voltage-gated ion channel activity+++GO:0005248///voltage-gated sodium channel activity+++GO:0005261///cation channel activity+++GO:0005272///sodium channel activity+++GO:0005515///protein binding+++GO:0005524///ATP binding+++GO:0031402///sodium ion binding	molecular_function	binding+++transporter activity	0.403102	1.69409e-63	4.25146e-61
313729	Errfi1	mRNA	GO:0005515///protein binding+++GO:0017124///SH3 domain binding+++GO:0019900///kinase binding+++GO:0019901///protein kinase binding+++GO:0031267///small GTPase binding	molecular_function	binding	0.60775	1.3232e-84	5.77167e-82
315840	Myo6	mRNA	GO:0000146///microfilament motor activity+++GO:0000166///nucleotide binding+++GO:0003774///motor activity+++GO:0003779///actin binding+++GO:0005515///protein binding+++GO:0005516///calmodulin binding+++GO:0005524///ATP binding+++GO:0030898///actin-dependent ATPase activity+++GO:0042802///identical protein binding+++GO:0043531///ADP binding+++GO:0051015///actin filament binding	molecular_function	catalytic activity+++binding	0.422259	4.92073e-91	2.31148e-88
353227	Zbtb16	mRNA	GO:0000978///RNA polymerase II proximal promoter sequence-specific DNA binding+++GO:0001227///DNA-binding transcription repressor activity, RNA polymerase II-specific+++GO:0003676///nucleic acid binding+++GO:0003677///DNA binding+++GO:0003690///double-stranded DNA binding+++GO:0003700///DNA-binding transcription factor activity+++GO:0005515///protein binding+++GO:0008022///protein C-terminus bind…	molecular_function	binding+++transcription regulator activity	0.986139	3.43572e-159	3.7025e-156
361474	Ipcef1	mRNA	GO:0005515///protein binding+++GO:0019904///protein domain specific binding	molecular_function	binding	0.390351	1.63633e-05	0.00012122
50592	Gria1	mRNA	GO:0001540///amyloid-beta binding+++GO:0001965///G-protein alpha-subunit binding+++GO:0004970///ionotropic glutamate receptor activity+++GO:0004971///AMPA glutamate receptor activity+++GO:0005216///ion channel activity+++GO:0005515///protein binding+++GO:0008022///protein C-terminus binding+++GO:0008066///glutamate receptor activity+++GO:0008179///adenylate cyclase binding+++GO:0015276///ligand-g…	molecular_function	binding+++molecular transducer activity+++transporter activity	0.388484	5.20056e-16	1.38279e-14
54234	Cacna1e	mRNA	GO:0005216///ion channel activity+++GO:0005244///voltage-gated ion channel activity+++GO:0005245///voltage-gated calcium channel activity+++GO:0005262///calcium channel activity+++GO:0005509///calcium ion binding+++GO:0005515///protein binding+++GO:0008332///low voltage-gated calcium channel activity+++GO:0022843///voltage-gated cation channel activity+++GO:0046872///metal ion binding+++GO:004748…	molecular_function	transporter activity+++binding	0.407799	5.82902e-74	1.94159e-71
56768	Pclo	mRNA	GO:0001222///transcription corepressor binding+++GO:0005509///calcium ion binding+++GO:0005515///protein binding+++GO:0005522///profilin binding+++GO:0005544///calcium-dependent phospholipid binding+++GO:0046872///metal ion binding+++GO:0098882///structural constituent of presynaptic active zone	molecular_function	binding+++structural molecule activity	0.400091	1.15128e-46	1.71475e-44
56817	Kcnip2	mRNA	GO:0005244///voltage-gated ion channel activity+++GO:0005250///A-type (transient outward) potassium channel activity+++GO:0005267///potassium channel activity+++GO:0005509///calcium ion binding+++GO:0005515///protein binding+++GO:0015459///potassium channel regulator activity+++GO:0042802///identical protein binding+++GO:0044325///ion channel binding+++GO:0044877///protein-containing complex bind…	molecular_function	transporter activity+++binding+++molecular function regulator	0.521689	1.21861e-21	5.29025e-20
59322	Cnksr2	mRNA	GO:0005515///protein binding+++GO:0019901///protein kinase binding+++GO:0042802///identical protein binding	molecular_function	binding	0.360762	2.81058e-07	2.8862e-06
64345	Hif3a	mRNA	GO:0000981///DNA-binding transcription factor activity, RNA polymerase II-specific+++GO:0003677///DNA binding+++GO:0003700///DNA-binding transcription factor activity+++GO:0003713///transcription coactivator activity+++GO:0003714///transcription corepressor activity+++GO:0005515///protein binding+++GO:0046983///protein dimerization activity	molecular_function	transcription regulator activity+++binding	2.00799	4.56786e-23	2.20219e-21
65047	Slit1	mRNA	GO:0005509///calcium ion binding+++GO:0005515///protein binding+++GO:0008201///heparin binding+++GO:0043395///heparan sulfate proteoglycan binding+++GO:0048495///Roundabout binding	molecular_function	binding	0.449724	8.68692e-30	6.21658e-28
66012	Gucy1a2	mRNA	GO:0000166///nucleotide binding+++GO:0004383///guanylate cyclase activity+++GO:0005515///protein binding+++GO:0005525///GTP binding+++GO:0016829///lyase activity+++GO:0016849///phosphorus-oxygen lyase activity+++GO:0020037///heme binding+++GO:0044877///protein-containing complex binding	molecular_function	binding+++catalytic activity	0.499089	8.29119e-07	7.78547e-06
684969	Potef	mRNA	GO:0005515///protein binding	molecular_function	binding	5.74283	6.53904e-08	7.41766e-07
78960	Prx	mRNA	GO:0005515///protein binding	molecular_function	binding	0.802799	1.50047e-12	2.9879e-11
81672	Grm7	mRNA	GO:0001640///adenylate cyclase inhibiting G protein-coupled glutamate receptor activity+++GO:0001642///group III metabotropic glutamate receptor activity+++GO:0004930///G protein-coupled receptor activity+++GO:0005245///voltage-gated calcium channel activity+++GO:0005246///calcium channel regulator activity+++GO:0005509///calcium ion binding+++GO:0005515///protein binding+++GO:0005516///calmoduli…	molecular_function	molecular transducer activity+++transporter activity+++molecular function regulator+++binding	0.39857	1.50406e-17	4.57713e-16
83731	Kcnma1	mRNA	GO:0003779///actin binding+++GO:0005216///ion channel activity+++GO:0005244///voltage-gated ion channel activity+++GO:0005249///voltage-gated potassium channel activity+++GO:0005267///potassium channel activity+++GO:0005515///protein binding+++GO:0015269///calcium-activated potassium channel activity+++GO:0042802///identical protein binding+++GO:0044877///protein-containing complex binding+++GO:0…	molecular_function	binding+++transporter activity	0.348082	3.89481e-10	5.99101e-09
84573	Otof	mRNA	GO:0005509///calcium ion binding+++GO:0005515///protein binding+++GO:0035612///AP-2 adaptor complex binding+++GO:0044877///protein-containing complex binding+++GO:0046872///metal ion binding	molecular_function	binding	0.498195	3.03191e-33	2.69634e-31
85435	Smad9	mRNA	GO:0003677///DNA binding+++GO:0003700///DNA-binding transcription factor activity+++GO:0005515///protein binding+++GO:0046872///metal ion binding	molecular_function	binding+++transcription regulator activity	0.356808	6.45086e-05	0.000419971
The top 10 mostly enriched celluar component of up-regulated DEGs
GO_C Term ID	GO_C Term Desc	GO_C Term Level1	GO_C Term Level2	Term Candidate Gene Num	Total Candidate Gene Num	Term Gene Num	Total Gene Num	Rich Ratio	P value	Q value
GO:0030425	dendrite	cellular_component	cell	39	334	597	18536	0.0653266	3.53342e-12	1.34623e-09
GO:0098978	glutamatergic synapse	cellular_component	synapse	35	334	535	18536	0.0654206	4.73102e-11	9.0126e-09
GO:0043025	neuronal cell body	cellular_component	cell	38	334	637	18536	0.0596546	9.89918e-11	1.2572e-08
GO:0043005	neuron projection	cellular_component	cell	34	334	563	18536	0.0603908	7.49421e-10	7.13824e-08
GO:0045211	postsynaptic membrane	cellular_component	cell	19	334	207	18536	0.0917874	7.14028e-09	5.44089e-07
GO:0099056	integral component of presynaptic membrane	cellular_component	cell	13	334	102	18536	0.127451	3.70339e-08	2.35165e-06
GO:0045202	synapse	cellular_component	synapse	39	334	833	18536	0.0468187	5.00038e-08	2.72163e-06
GO:0042734	presynaptic membrane	cellular_component	cell	12	334	96	18536	0.125	1.55006e-07	7.38217e-06
GO:0005887	integral component of plasma membrane	cellular_component	cell	42	334	995	18536	0.0422111	2.55825e-07	1.08299e-05
GO:0099055	integral component of postsynaptic membrane	cellular_component	cell	11	334	88	18536	0.125	5.12795e-07	1.95375e-05
dendrite
Gene ID	Gene Symbol	Type	GO_C Term	GO_C Term Level1	GO_C Term Level2	log2 (SMIR_SCDH / Con_SCDH)	Pvalue(SMIR_SCDH / Con_SCDH)	Qvalue (SMIR_SCDH / Con_SCDH)
103689931	LOC103689931	mRNA	GO:0005634///nucleus+++GO:0005654///nucleoplasm+++GO:0005737///cytoplasm+++GO:0030425///dendrite+++GO:0071598///neuronal ribonucleoprotein granule+++GO:0090575///RNA polymerase II transcription factor complex+++GO:0099523///presynaptic cytosol+++GO:1990124///messenger ribonucleoprotein complex+++GO:1990904///ribonucleoprotein complex	cellular_component	organelle+++cell part+++cell+++membrane-enclosed lumen+++organelle part+++protein-containing complex+++synapse+++synapse part	4.29189	0	0
103694905	LOC103694905	mRNA	GO:0005791///rough endoplasmic reticulum+++GO:0005887///integral component of plasma membrane+++GO:0008021///synaptic vesicle+++GO:0016020///membrane+++GO:0016021///integral component of membrane+++GO:0030425///dendrite+++GO:0043025///neuronal cell body+++GO:0043679///axon terminus+++GO:0045202///synapse+++GO:0099055///integral component of postsynaptic membrane+++GO:0099056///integral component …	cellular_component	organelle+++cell part+++cell+++membrane+++membrane part+++synapse+++synapse part	1.09459	1.34428e-16	3.78881e-15
116671	Cdk5r1	mRNA	GO:0005634///nucleus+++GO:0005654///nucleoplasm+++GO:0005737///cytoplasm+++GO:0005886///plasma membrane+++GO:0014069///postsynaptic density+++GO:0016020///membrane+++GO:0016533///protein kinase 5 complex+++GO:0030424///axon+++GO:0030425///dendrite+++GO:0030426///growth cone+++GO:0031594///neuromuscular junction+++GO:0042995///cell projection+++GO:0043005///neuron projection+++GO:0043025///neurona…	cellular_component	organelle+++cell part+++cell+++membrane-enclosed lumen+++organelle part+++membrane+++synapse+++synapse part+++protein-containing complex+++supramolecular complex	0.3564	1.59396e-11	2.87698e-10
116681	Dlgap2	mRNA	GO:0005883///neurofilament+++GO:0005886///plasma membrane+++GO:0014069///postsynaptic density+++GO:0016020///membrane+++GO:0030054///cell junction+++GO:0030425///dendrite+++GO:0043197///dendritic spine+++GO:0045202///synapse+++GO:0045211///postsynaptic membrane	cellular_component	organelle+++cell part+++supramolecular complex+++cell+++organelle part+++membrane+++synapse+++synapse part+++cell junction+++membrane part	0.441925	1.27434e-06	1.15402e-05
140933	Trpc5	mRNA	GO:0005623///cell+++GO:0005737///cytoplasm+++GO:0005887///integral component of plasma membrane+++GO:0016020///membrane+++GO:0016021///integral component of membrane+++GO:0030425///dendrite+++GO:0030426///growth cone+++GO:0034703///cation channel complex+++GO:0034704///calcium channel complex+++GO:0043025///neuronal cell body+++GO:0045121///membrane raft	cellular_component	cell+++cell part+++membrane+++membrane part+++protein-containing complex	0.453465	2.34286e-14	5.49567e-13
171026	Akap5	mRNA	GO:0005623///cell+++GO:0005737///cytoplasm+++GO:0005856///cytoskeleton+++GO:0005886///plasma membrane+++GO:0009898///cytoplasmic side of plasma membrane+++GO:0014069///postsynaptic density+++GO:0016020///membrane+++GO:0016323///basolateral plasma membrane+++GO:0030425///dendrite+++GO:0031527///filopodium membrane+++GO:0032279///asymmetric synapse+++GO:0032590///dendrite membrane+++GO:0032591///de…	cellular_component	cell+++cell part+++organelle+++membrane+++membrane part+++synapse+++synapse part+++protein-containing complex+++organelle part	0.378537	5.33327e-06	4.32326e-05
24208	Ar	mRNA	GO:0000790///nuclear chromatin+++GO:0005634///nucleus+++GO:0005737///cytoplasm+++GO:0005886///plasma membrane+++GO:0016607///nuclear speck+++GO:0030424///axon+++GO:0030425///dendrite+++GO:0032991///protein-containing complex+++GO:0042025///host cell nucleus	cellular_component	membrane-enclosed lumen+++organelle+++cell part+++cell+++organelle part+++membrane+++protein-containing complex+++other organism part+++other organism	0.419482	5.80351e-05	0.000381898
24590	Mme	mRNA	GO:0005737///cytoplasm+++GO:0005769///early endosome+++GO:0005802///trans-Golgi network+++GO:0005886///plasma membrane+++GO:0005903///brush border+++GO:0008021///synaptic vesicle+++GO:0016020///membrane+++GO:0016021///integral component of membrane+++GO:0030424///axon+++GO:0030425///dendrite+++GO:0031410///cytoplasmic vesicle+++GO:0043025///neuronal cell body+++GO:0044306///neuron projection term…	cellular_component	cell part+++cell+++organelle+++organelle part+++membrane+++synapse+++synapse part+++membrane part	0.383545	0.000117125	0.000717396
24598	Nos1	mRNA	GO:0001917///photoreceptor inner segment+++GO:0005623///cell+++GO:0005634///nucleus+++GO:0005654///nucleoplasm+++GO:0005737///cytoplasm+++GO:0005739///mitochondrion+++GO:0005741///mitochondrial outer membrane+++GO:0005829///cytosol+++GO:0005856///cytoskeleton+++GO:0005886///plasma membrane+++GO:0005901///caveola+++GO:0012506///vesicle membrane+++GO:0014069///postsynaptic density+++GO:0016020///me…	cellular_component	cell part+++cell+++organelle+++membrane-enclosed lumen+++organelle part+++membrane+++membrane part+++synapse+++synapse part+++supramolecular complex+++cell junction+++protein-containing complex	0.442392	8.52029e-12	1.57828e-10
24807	Tacr1	mRNA	GO:0005623///cell+++GO:0005737///cytoplasm+++GO:0005886///plasma membrane+++GO:0009986///cell surface+++GO:0016020///membrane+++GO:0016021///integral component of membrane+++GO:0030425///dendrite+++GO:0036126///sperm flagellum+++GO:0044297///cell body+++GO:0061827///sperm head+++GO:0071944///cell periphery+++GO:0097225///sperm midpiece	cellular_component	cell+++cell part+++membrane+++membrane part+++organelle+++organelle part	0.358199	4.73447e-11	8.12892e-10
25111	Chrm4	mRNA	GO:0005737///cytoplasm+++GO:0005886///plasma membrane+++GO:0005887///integral component of plasma membrane+++GO:0014069///postsynaptic density+++GO:0016020///membrane+++GO:0016021///integral component of membrane+++GO:0030054///cell junction+++GO:0030425///dendrite+++GO:0032279///asymmetric synapse+++GO:0042383///sarcolemma+++GO:0043025///neuronal cell body+++GO:0043679///axon terminus+++GO:00452…	cellular_component	cell part+++cell+++membrane+++membrane part+++organelle+++synapse+++synapse part+++cell junction+++organelle part	0.495088	1.68394e-05	0.000124344
25113	Ddn	mRNA	GO:0005634///nucleus+++GO:0005737///cytoplasm+++GO:0005783///endoplasmic reticulum+++GO:0005789///endoplasmic reticulum membrane+++GO:0005886///plasma membrane+++GO:0016020///membrane+++GO:0016021///integral component of membrane+++GO:0030054///cell junction+++GO:0030425///dendrite+++GO:0032591///dendritic spine membrane+++GO:0042995///cell projection+++GO:0043197///dendritic spine+++GO:0043204//…	cellular_component	organelle+++cell part+++cell+++membrane+++membrane part+++organelle part+++cell junction+++synapse+++synapse part	0.605023	9.21001e-05	0.000578229
25204	Pcsk1	mRNA	GO:0005615///extracellular space+++GO:0005791///rough endoplasmic reticulum+++GO:0005802///trans-Golgi network+++GO:0016020///membrane+++GO:0016021///integral component of membrane+++GO:0030133///transport vesicle+++GO:0030141///secretory granule+++GO:0030425///dendrite+++GO:0031410///cytoplasmic vesicle+++GO:0034774///secretory granule lumen+++GO:0043005///neuron projection+++GO:0043025///neuron…	cellular_component	extracellular region part+++extracellular region+++organelle+++cell part+++cell+++organelle part+++membrane+++membrane part+++membrane-enclosed lumen+++synapse+++synapse part	0.471641	8.55489e-06	6.67201e-05
25400	Camk2a	mRNA	GO:0005634///nucleus+++GO:0005737///cytoplasm+++GO:0005739///mitochondrion+++GO:0005829///cytosol+++GO:0005954///calcium- and calmodulin-dependent protein kinase complex+++GO:0014069///postsynaptic density+++GO:0016020///membrane+++GO:0030054///cell junction+++GO:0030424///axon+++GO:0030425///dendrite+++GO:0032839///dendrite cytoplasm+++GO:0042995///cell projection+++GO:0043005///neuron projectio…	cellular_component	organelle+++cell part+++cell+++protein-containing complex+++synapse+++synapse part+++membrane+++cell junction+++membrane part+++organelle part	0.347121	1.35563e-19	4.99701e-18
25601	Oprm1	mRNA	GO:0005623///cell+++GO:0005737///cytoplasm+++GO:0005768///endosome+++GO:0005886///plasma membrane+++GO:0005887///integral component of plasma membrane+++GO:0005925///focal adhesion+++GO:0016020///membrane+++GO:0016021///integral component of membrane+++GO:0030424///axon+++GO:0030425///dendrite+++GO:0032590///dendrite membrane+++GO:0032839///dendrite cytoplasm+++GO:0042383///sarcolemma+++GO:004299…	cellular_component	cell+++cell part+++organelle+++membrane+++membrane part+++cell junction+++synapse+++synapse part	0.711031	4.77201e-07	4.68506e-06
25743	Kcnj6	mRNA	GO:0005737///cytoplasm+++GO:0005886///plasma membrane+++GO:0009986///cell surface+++GO:0016020///membrane+++GO:0016021///integral component of membrane+++GO:0030424///axon+++GO:0030425///dendrite+++GO:0032809///neuronal cell body membrane+++GO:0098688///parallel fiber to Purkinje cell synapse+++GO:0099056///integral component of presynaptic membrane	cellular_component	cell part+++cell+++membrane+++membrane part+++synapse+++synapse part	0.456512	1.0163e-38	1.13528e-36
257648	Cacna1b	mRNA	GO:0005886///plasma membrane+++GO:0005891///voltage-gated calcium channel complex+++GO:0016020///membrane+++GO:0016021///integral component of membrane+++GO:0016323///basolateral plasma membrane+++GO:0030425///dendrite+++GO:0032991///protein-containing complex+++GO:0043005///neuron projection+++GO:0043025///neuronal cell body+++GO:0043198///dendritic shaft+++GO:0043679///axon terminus+++GO:004430…	cellular_component	membrane+++cell part+++cell+++membrane part+++protein-containing complex+++synapse+++synapse part+++organelle+++organelle part	0.341829	3.62085e-30	2.66401e-28
266715	Fzd3	mRNA	GO:0005575///cellular_component+++GO:0005737///cytoplasm+++GO:0005886///plasma membrane+++GO:0016020///membrane+++GO:0016021///integral component of membrane+++GO:0016324///apical plasma membrane+++GO:0016328///lateral plasma membrane+++GO:0030424///axon+++GO:0030425///dendrite+++GO:0032433///filopodium tip+++GO:0043025///neuronal cell body+++GO:0045177///apical part of cell+++GO:0048786///presyn…	cellular_component	cellular_component+++cell part+++cell+++membrane+++membrane part+++synapse+++synapse part	0.496734	6.96877e-09	9.11914e-08
29190	Pdyn	mRNA	GO:0005576///extracellular region+++GO:0005737///cytoplasm+++GO:0005886///plasma membrane+++GO:0008021///synaptic vesicle+++GO:0030425///dendrite+++GO:0043025///neuronal cell body+++GO:0043679///axon terminus+++GO:0099013///neuronal dense core vesicle lumen	cellular_component	extracellular region+++cell part+++cell+++membrane+++organelle+++synapse+++synapse part+++membrane-enclosed lumen+++organelle part	0.396801	7.52772e-15	1.84616e-13
29335	Oprk1	mRNA	GO:0005623///cell+++GO:0005654///nucleoplasm+++GO:0005829///cytosol+++GO:0005886///plasma membrane+++GO:0005887///integral component of plasma membrane+++GO:0016020///membrane+++GO:0016021///integral component of membrane+++GO:0030285///integral component of synaptic vesicle membrane+++GO:0030425///dendrite+++GO:0043005///neuron projection+++GO:0043025///neuronal cell body+++GO:0043204///perikary…	cellular_component	cell+++membrane-enclosed lumen+++organelle+++cell part+++organelle part+++membrane+++membrane part+++synapse+++synapse part	0.387418	4.81282e-06	3.93444e-05
29559	Grik1	mRNA	GO:0005886///plasma membrane+++GO:0008328///ionotropic glutamate receptor complex+++GO:0014069///postsynaptic density+++GO:0016020///membrane+++GO:0016021///integral component of membrane+++GO:0030054///cell junction+++GO:0030425///dendrite+++GO:0032983///kainate selective glutamate receptor complex+++GO:0042734///presynaptic membrane+++GO:0043025///neuronal cell body+++GO:0043195///terminal bout…	cellular_component	membrane+++cell part+++cell+++membrane part+++protein-containing complex+++organelle+++synapse+++synapse part+++cell junction+++organelle part	0.339395	6.15367e-06	4.92079e-05
29647	Cask	mRNA	GO:0005604///basement membrane+++GO:0005634///nucleus+++GO:0005652///nuclear lamina+++GO:0005730///nucleolus+++GO:0005737///cytoplasm+++GO:0005829///cytosol+++GO:0005886///plasma membrane+++GO:0005911///cell-cell junction+++GO:0014069///postsynaptic density+++GO:0016020///membrane+++GO:0016021///integral component of membrane+++GO:0016323///basolateral plasma membrane+++GO:0016363///nuclear matri…	cellular_component	extracellular region part+++extracellular region+++organelle+++cell part+++cell+++membrane-enclosed lumen+++organelle part+++membrane+++cell junction+++synapse+++synapse part+++membrane part+++protein-containing complex	0.322415	2.99834e-08	3.56454e-07
29710	Scn8a	mRNA	GO:0001518///voltage-gated sodium channel complex+++GO:0005886///plasma membrane+++GO:0016020///membrane+++GO:0016021///integral component of membrane+++GO:0030018///Z disc+++GO:0030054///cell junction+++GO:0030424///axon+++GO:0030425///dendrite+++GO:0033268///node of Ranvier+++GO:0034706///sodium channel complex+++GO:0042995///cell projection+++GO:0043025///neuronal cell body+++GO:0043194///axon…	cellular_component	membrane+++cell part+++membrane part+++protein-containing complex+++cell+++organelle+++supramolecular complex+++organelle part+++cell junction+++synapse+++synapse part	0.403102	1.69409e-63	4.25146e-61
29717	Cacna1g	mRNA	GO:0001518///voltage-gated sodium channel complex+++GO:0005623///cell+++GO:0005737///cytoplasm+++GO:0005886///plasma membrane+++GO:0005891///voltage-gated calcium channel complex+++GO:0016020///membrane+++GO:0016021///integral component of membrane+++GO:0030425///dendrite+++GO:0043005///neuron projection+++GO:0043025///neuronal cell body+++GO:0044297///cell body+++GO:0045202///synapse+++GO:004847…	cellular_component	membrane+++cell part+++membrane part+++protein-containing complex+++cell+++synapse	0.358351	2.43869e-44	3.21416e-42
298521	Grik3	mRNA	GO:0005886///plasma membrane+++GO:0005887///integral component of plasma membrane+++GO:0016020///membrane+++GO:0016021///integral component of membrane+++GO:0030054///cell junction+++GO:0030424///axon+++GO:0030425///dendrite+++GO:0032839///dendrite cytoplasm+++GO:0032983///kainate selective glutamate receptor complex+++GO:0042734///presynaptic membrane+++GO:0043195///terminal bouton+++GO:0043204/…	cellular_component	membrane+++cell part+++cell+++membrane part+++cell junction+++protein-containing complex+++synapse+++synapse part+++organelle+++organelle part	0.458586	2.00012e-08	2.44934e-07
313633	Ephb2	mRNA	GO:0005575///cellular_component+++GO:0005654///nucleoplasm+++GO:0005886///plasma membrane+++GO:0005887///integral component of plasma membrane+++GO:0030424///axon+++GO:0030425///dendrite+++GO:0043025///neuronal cell body+++GO:0043235///receptor complex+++GO:0098978///glutamatergic synapse+++GO:0099055///integral component of postsynaptic membrane+++GO:0099056///integral component of presynaptic m…	cellular_component	cellular_component+++membrane-enclosed lumen+++organelle+++cell part+++cell+++organelle part+++membrane+++membrane part+++protein-containing complex+++synapse+++synapse part	0.400926	3.28317e-07	3.3121e-06
315311	Slc4a8	mRNA	GO:0005623///cell+++GO:0005886///plasma membrane+++GO:0008021///synaptic vesicle+++GO:0016020///membrane+++GO:0016021///integral component of membrane+++GO:0030425///dendrite+++GO:0032279///asymmetric synapse+++GO:0032280///symmetric synapse+++GO:0032809///neuronal cell body membrane+++GO:0042734///presynaptic membrane+++GO:0043005///neuron projection+++GO:0043195///terminal bouton+++GO:0043679//…	cellular_component	cell+++membrane+++cell part+++organelle+++synapse+++synapse part+++membrane part	0.413514	2.87135e-23	1.40275e-21
315510	Igsf9b	mRNA	GO:0005886///plasma membrane+++GO:0014069///postsynaptic density+++GO:0016020///membrane+++GO:0016021///integral component of membrane+++GO:0030054///cell junction+++GO:0030425///dendrite+++GO:0043005///neuron projection+++GO:0043025///neuronal cell body+++GO:0045202///synapse+++GO:0045211///postsynaptic membrane+++GO:0060077///inhibitory synapse+++GO:0098982///GABA-ergic synapse+++GO:0099629///p…	cellular_component	membrane+++cell part+++cell+++organelle+++synapse+++synapse part+++membrane part+++cell junction	0.53644	2.09081e-13	4.46951e-12
366274	Ntsr1	mRNA	GO:0005623///cell+++GO:0005737///cytoplasm+++GO:0005739///mitochondrion+++GO:0005783///endoplasmic reticulum+++GO:0005794///Golgi apparatus+++GO:0005886///plasma membrane+++GO:0005887///integral component of plasma membrane+++GO:0009898///cytoplasmic side of plasma membrane+++GO:0009986///cell surface+++GO:0016020///membrane+++GO:0016021///integral component of membrane+++GO:0030424///axon+++GO:0…	cellular_component	cell+++cell part+++organelle+++membrane+++membrane part+++synapse+++synapse part	0.394456	4.34512e-06	3.58732e-05
500105	Cntnap2	mRNA	GO:0005769///early endosome+++GO:0005794///Golgi apparatus+++GO:0005886///plasma membrane+++GO:0008076///voltage-gated potassium channel complex+++GO:0009986///cell surface+++GO:0016020///membrane+++GO:0016021///integral component of membrane+++GO:0030424///axon+++GO:0030425///dendrite+++GO:0030673///axolemma+++GO:0033270///paranode region of axon+++GO:0043005///neuron projection+++GO:0043025///n…	cellular_component	organelle+++cell part+++cell+++membrane+++membrane part+++protein-containing complex+++synapse+++synapse part	0.357054	1.52221e-35	1.51559e-33
50592	Gria1	mRNA	GO:0005768///endosome+++GO:0005769///early endosome+++GO:0005783///endoplasmic reticulum+++GO:0005789///endoplasmic reticulum membrane+++GO:0005829///cytosol+++GO:0005886///plasma membrane+++GO:0005911///cell-cell junction+++GO:0008021///synaptic vesicle+++GO:0008328///ionotropic glutamate receptor complex+++GO:0009986///cell surface+++GO:0014069///postsynaptic density+++GO:0016020///membrane+++G…	cellular_component	organelle+++cell part+++cell+++membrane+++membrane part+++organelle part+++cell junction+++synapse+++synapse part+++protein-containing complex+++extracellular region	0.388484	5.20056e-16	1.38279e-14
56768	Pclo	mRNA	GO:0005798///Golgi-associated vesicle+++GO:0005802///trans-Golgi network+++GO:0014069///postsynaptic density+++GO:0030054///cell junction+++GO:0030133///transport vesicle+++GO:0030424///axon+++GO:0030425///dendrite+++GO:0030426///growth cone+++GO:0031594///neuromuscular junction+++GO:0042995///cell projection+++GO:0043005///neuron projection+++GO:0043025///neuronal cell body+++GO:0043195///termin…	cellular_component	organelle+++cell part+++cell+++organelle part+++synapse+++synapse part+++cell junction	0.400091	1.15128e-46	1.71475e-44
56817	Kcnip2	mRNA	GO:0005737///cytoplasm+++GO:0005886///plasma membrane+++GO:0008076///voltage-gated potassium channel complex+++GO:0016020///membrane+++GO:0030425///dendrite	cellular_component	cell part+++cell+++membrane+++membrane part+++protein-containing complex	0.521689	1.21861e-21	5.29025e-20
57302	Cnr2	mRNA	GO:0005737///cytoplasm+++GO:0005783///endoplasmic reticulum+++GO:0005886///plasma membrane+++GO:0016020///membrane+++GO:0016021///integral component of membrane+++GO:0030425///dendrite+++GO:0031234///extrinsic component of cytoplasmic side of plasma membrane+++GO:0042995///cell projection+++GO:0043005///neuron projection+++GO:0043025///neuronal cell body+++GO:0043204///perikaryon	cellular_component	cell part+++cell+++organelle+++membrane+++membrane part	0.329283	6.64855e-05	0.000432226
59318	Negr1	mRNA	GO:0005886///plasma membrane+++GO:0016020///membrane+++GO:0030425///dendrite+++GO:0031225///anchored component of membrane+++GO:0043025///neuronal cell body	cellular_component	membrane+++cell part+++cell+++membrane part	0.35045	1.70155e-15	4.39667e-14
81645	Chrm2	mRNA	GO:0005886///plasma membrane+++GO:0005887///integral component of plasma membrane+++GO:0016020///membrane+++GO:0016021///integral component of membrane+++GO:0030054///cell junction+++GO:0030425///dendrite+++GO:0032279///asymmetric synapse+++GO:0032280///symmetric synapse+++GO:0043025///neuronal cell body+++GO:0043679///axon terminus+++GO:0045202///synapse+++GO:0045211///postsynaptic membrane+++GO…	cellular_component	membrane+++cell part+++cell+++membrane part+++cell junction+++synapse+++synapse part	0.322306	8.69003e-07	8.11424e-06
81672	Grm7	mRNA	GO:0005791///rough endoplasmic reticulum+++GO:0005794///Golgi apparatus+++GO:0005886///plasma membrane+++GO:0005887///integral component of plasma membrane+++GO:0005938///cell cortex+++GO:0009986///cell surface+++GO:0016020///membrane+++GO:0016021///integral component of membrane+++GO:0030424///axon+++GO:0030425///dendrite+++GO:0032279///asymmetric synapse+++GO:0032991///protein-containing comple…	cellular_component	organelle+++cell part+++cell+++membrane+++membrane part+++synapse+++protein-containing complex+++synapse part	0.39857	1.50406e-17	4.57713e-16
83731	Kcnma1	mRNA	GO:0005623///cell+++GO:0005737///cytoplasm+++GO:0005739///mitochondrion+++GO:0005783///endoplasmic reticulum+++GO:0005789///endoplasmic reticulum membrane+++GO:0005886///plasma membrane+++GO:0005901///caveola+++GO:0008076///voltage-gated potassium channel complex+++GO:0009897///external side of plasma membrane+++GO:0016020///membrane+++GO:0016021///integral component of membrane+++GO:0016324///ap…	cellular_component	cell+++cell part+++organelle+++membrane+++membrane part+++organelle part+++protein-containing complex+++synapse+++synapse part	0.348082	3.89481e-10	5.99101e-09
85266	Prss12	mRNA	GO:0005576///extracellular region+++GO:0005886///plasma membrane+++GO:0016020///membrane+++GO:0030424///axon+++GO:0030425///dendrite+++GO:0031410///cytoplasmic vesicle+++GO:0043083///synaptic cleft+++GO:0043195///terminal bouton+++GO:0045202///synapse	cellular_component	extracellular region+++membrane+++cell part+++cell+++organelle+++synapse+++synapse part	0.456141	1.20817e-07	1.32141e-06
glutamatergic synapse
Gene ID	Gene Symbol	Type	GO_C Term	GO_C Term Level1	GO_C Term Level2	log2 (SMIR_SCDH / Con_SCDH)	Pvalue(SMIR_SCDH / Con_SCDH)	Qvalue (SMIR_SCDH / Con_SCDH)
100909595	LOC100909595	mRNA	GO:0002080///acrosomal membrane+++GO:0005737///cytoplasm+++GO:0005886///plasma membrane+++GO:0005887///integral component of plasma membrane+++GO:0005901///caveola+++GO:0016021///integral component of membrane+++GO:0030672///synaptic vesicle membrane+++GO:0042995///cell projection+++GO:0043204///perikaryon+++GO:0098978///glutamatergic synapse+++GO:0099699///integral component of synaptic membrane	cellular_component	organelle+++membrane+++cell part+++cell+++organelle part+++membrane part+++synapse+++synapse part	0.523769	2.29331e-23	1.13244e-21
140726	Cacng5	mRNA	GO:0005886///plasma membrane+++GO:0014069///postsynaptic density+++GO:0016020///membrane+++GO:0016021///integral component of membrane+++GO:0030054///cell junction+++GO:0032281///AMPA glutamate receptor complex+++GO:0045202///synapse+++GO:0045211///postsynaptic membrane+++GO:0098839///postsynaptic density membrane+++GO:0098978///glutamatergic synapse+++GO:0099055///integral component of postsynap…	cellular_component	membrane+++cell part+++cell+++organelle+++synapse+++synapse part+++membrane part+++cell junction+++protein-containing complex+++organelle part	0.368064	1.19522e-09	1.73369e-08
171026	Akap5	mRNA	GO:0005623///cell+++GO:0005737///cytoplasm+++GO:0005856///cytoskeleton+++GO:0005886///plasma membrane+++GO:0009898///cytoplasmic side of plasma membrane+++GO:0014069///postsynaptic density+++GO:0016020///membrane+++GO:0016323///basolateral plasma membrane+++GO:0030425///dendrite+++GO:0031527///filopodium membrane+++GO:0032279///asymmetric synapse+++GO:0032590///dendrite membrane+++GO:0032591///de…	cellular_component	cell+++cell part+++organelle+++membrane+++membrane part+++synapse+++synapse part+++protein-containing complex+++organelle part	0.378537	5.33327e-06	4.32326e-05
24409	Grin2a	mRNA	GO:0005623///cell+++GO:0005783///endoplasmic reticulum+++GO:0005886///plasma membrane+++GO:0005887///integral component of plasma membrane+++GO:0008021///synaptic vesicle+++GO:0009986///cell surface+++GO:0014069///postsynaptic density+++GO:0016020///membrane+++GO:0016021///integral component of membrane+++GO:0017146///NMDA selective glutamate receptor complex+++GO:0030054///cell junction+++GO:003…	cellular_component	cell+++organelle+++cell part+++membrane+++membrane part+++synapse+++synapse part+++protein-containing complex+++cell junction+++organelle part	0.628588	7.28339e-30	5.25322e-28
24418	Grm5	mRNA	GO:0005623///cell+++GO:0005737///cytoplasm+++GO:0005886///plasma membrane+++GO:0005887///integral component of plasma membrane+++GO:0014069///postsynaptic density+++GO:0016020///membrane+++GO:0016021///integral component of membrane+++GO:0043005///neuron projection+++GO:0043197///dendritic spine+++GO:0043198///dendritic shaft+++GO:0045211///postsynaptic membrane+++GO:0097449///astrocyte projectio…	cellular_component	cell+++cell part+++membrane+++membrane part+++organelle+++synapse+++synapse part+++organelle part	0.479358	9.33452e-31	7.15516e-29
24598	Nos1	mRNA	GO:0001917///photoreceptor inner segment+++GO:0005623///cell+++GO:0005634///nucleus+++GO:0005654///nucleoplasm+++GO:0005737///cytoplasm+++GO:0005739///mitochondrion+++GO:0005741///mitochondrial outer membrane+++GO:0005829///cytosol+++GO:0005856///cytoskeleton+++GO:0005886///plasma membrane+++GO:0005901///caveola+++GO:0012506///vesicle membrane+++GO:0014069///postsynaptic density+++GO:0016020///me…	cellular_component	cell part+++cell+++organelle+++membrane-enclosed lumen+++organelle part+++membrane+++membrane part+++synapse+++synapse part+++supramolecular complex+++cell junction+++protein-containing complex	0.442392	8.52029e-12	1.57828e-10
25111	Chrm4	mRNA	GO:0005737///cytoplasm+++GO:0005886///plasma membrane+++GO:0005887///integral component of plasma membrane+++GO:0014069///postsynaptic density+++GO:0016020///membrane+++GO:0016021///integral component of membrane+++GO:0030054///cell junction+++GO:0030425///dendrite+++GO:0032279///asymmetric synapse+++GO:0042383///sarcolemma+++GO:0043025///neuronal cell body+++GO:0043679///axon terminus+++GO:00452…	cellular_component	cell part+++cell+++membrane+++membrane part+++organelle+++synapse+++synapse part+++cell junction+++organelle part	0.495088	1.68394e-05	0.000124344
25132	Myo5b	mRNA	GO:0005737///cytoplasm+++GO:0005903///brush border+++GO:0015629///actin cytoskeleton+++GO:0016459///myosin complex+++GO:0031982///vesicle+++GO:0032991///protein-containing complex+++GO:0043005///neuron projection+++GO:0043025///neuronal cell body+++GO:0043197///dendritic spine+++GO:0045179///apical cortex+++GO:0048471///perinuclear region of cytoplasm+++GO:0055037///recycling endosome+++GO:009868…	cellular_component	cell part+++cell+++organelle+++protein-containing complex+++organelle part+++synapse+++synapse part+++membrane	0.378253	4.36308e-09	5.88166e-08
25248	Cnr1	mRNA	GO:0005737///cytoplasm+++GO:0005739///mitochondrion+++GO:0005741///mitochondrial outer membrane+++GO:0005886///plasma membrane+++GO:0015629///actin cytoskeleton+++GO:0016021///integral component of membrane+++GO:0030054///cell junction+++GO:0030424///axon+++GO:0030426///growth cone+++GO:0032592///integral component of mitochondrial membrane+++GO:0042734///presynaptic membrane+++GO:0043231///intra…	cellular_component	cell part+++cell+++organelle+++membrane+++organelle part+++membrane part+++cell junction+++synapse+++synapse part	0.333786	1.44623e-22	6.70758e-21
25399	Cacna2d1	mRNA	GO:0005623///cell+++GO:0005891///voltage-gated calcium channel complex+++GO:0016020///membrane+++GO:0016021///integral component of membrane+++GO:0016529///sarcoplasmic reticulum+++GO:0030315///T-tubule+++GO:0098978///glutamatergic synapse+++GO:0099025///anchored component of postsynaptic membrane+++GO:0099029///anchored component of presynaptic active zone membrane+++GO:1990454///L-type voltage-…	cellular_component	cell+++membrane+++cell part+++membrane part+++protein-containing complex+++organelle+++synapse+++synapse part	0.351212	1.38993e-26	8.2943e-25
25400	Camk2a	mRNA	GO:0005634///nucleus+++GO:0005737///cytoplasm+++GO:0005739///mitochondrion+++GO:0005829///cytosol+++GO:0005954///calcium- and calmodulin-dependent protein kinase complex+++GO:0014069///postsynaptic density+++GO:0016020///membrane+++GO:0030054///cell junction+++GO:0030424///axon+++GO:0030425///dendrite+++GO:0032839///dendrite cytoplasm+++GO:0042995///cell projection+++GO:0043005///neuron projectio…	cellular_component	organelle+++cell part+++cell+++protein-containing complex+++synapse+++synapse part+++membrane+++cell junction+++membrane part+++organelle part	0.347121	1.35563e-19	4.99701e-18
257648	Cacna1b	mRNA	GO:0005886///plasma membrane+++GO:0005891///voltage-gated calcium channel complex+++GO:0016020///membrane+++GO:0016021///integral component of membrane+++GO:0016323///basolateral plasma membrane+++GO:0030425///dendrite+++GO:0032991///protein-containing complex+++GO:0043005///neuron projection+++GO:0043025///neuronal cell body+++GO:0043198///dendritic shaft+++GO:0043679///axon terminus+++GO:004430…	cellular_component	membrane+++cell part+++cell+++membrane part+++protein-containing complex+++synapse+++synapse part+++organelle+++organelle part	0.341829	3.62085e-30	2.66401e-28
259269	Erc2	mRNA	GO:0005737///cytoplasm+++GO:0005783///endoplasmic reticulum+++GO:0005798///Golgi-associated vesicle+++GO:0005856///cytoskeleton+++GO:0014069///postsynaptic density+++GO:0016020///membrane+++GO:0030054///cell junction+++GO:0030426///growth cone+++GO:0032991///protein-containing complex+++GO:0042734///presynaptic membrane+++GO:0042995///cell projection+++GO:0043025///neuronal cell body+++GO:0043195…	cellular_component	cell part+++cell+++organelle+++synapse+++synapse part+++membrane+++cell junction+++protein-containing complex+++membrane part	0.347443	6.13072e-08	6.9891e-07
266777	Nptx1	mRNA	GO:0005737///cytoplasm+++GO:0005739///mitochondrion+++GO:0005886///plasma membrane+++GO:0030133///transport vesicle+++GO:0031410///cytoplasmic vesicle+++GO:0043005///neuron projection+++GO:0043083///synaptic cleft+++GO:0098978///glutamatergic synapse	cellular_component	cell part+++cell+++organelle+++membrane+++extracellular region+++synapse+++synapse part	0.361115	3.71892e-89	1.70326e-86
288475	Nptx2	mRNA	GO:0005576///extracellular region+++GO:0098892///extrinsic component of postsynaptic specialization membrane+++GO:0098978///glutamatergic synapse	cellular_component	extracellular region+++membrane+++organelle+++cell part+++membrane part+++cell+++organelle part+++synapse+++synapse part	0.448388	3.40386e-13	7.15122e-12
29130	Syn3	mRNA	GO:0008021///synaptic vesicle+++GO:0014069///postsynaptic density+++GO:0016020///membrane+++GO:0030054///cell junction+++GO:0030672///synaptic vesicle membrane+++GO:0031410///cytoplasmic vesicle+++GO:0045202///synapse+++GO:0098850///extrinsic component of synaptic vesicle membrane+++GO:0098978///glutamatergic synapse	cellular_component	organelle+++cell part+++cell+++synapse+++synapse part+++membrane+++cell junction+++organelle part+++membrane part	0.415719	3.35452e-10	5.23465e-09
294043	Sorcs3	mRNA	GO:0005575///cellular_component+++GO:0014069///postsynaptic density+++GO:0016020///membrane+++GO:0016021///integral component of membrane+++GO:0098978///glutamatergic synapse+++GO:0099061///integral component of postsynaptic density membrane	cellular_component	cellular_component+++organelle+++cell part+++cell+++synapse+++synapse part+++membrane+++membrane part+++organelle part	0.399414	9.86553e-11	1.62679e-09
29559	Grik1	mRNA	GO:0005886///plasma membrane+++GO:0008328///ionotropic glutamate receptor complex+++GO:0014069///postsynaptic density+++GO:0016020///membrane+++GO:0016021///integral component of membrane+++GO:0030054///cell junction+++GO:0030425///dendrite+++GO:0032983///kainate selective glutamate receptor complex+++GO:0042734///presynaptic membrane+++GO:0043025///neuronal cell body+++GO:0043195///terminal bout…	cellular_component	membrane+++cell part+++cell+++membrane part+++protein-containing complex+++organelle+++synapse+++synapse part+++cell junction+++organelle part	0.339395	6.15367e-06	4.92079e-05
29710	Scn8a	mRNA	GO:0001518///voltage-gated sodium channel complex+++GO:0005886///plasma membrane+++GO:0016020///membrane+++GO:0016021///integral component of membrane+++GO:0030018///Z disc+++GO:0030054///cell junction+++GO:0030424///axon+++GO:0030425///dendrite+++GO:0033268///node of Ranvier+++GO:0034706///sodium channel complex+++GO:0042995///cell projection+++GO:0043025///neuronal cell body+++GO:0043194///axon…	cellular_component	membrane+++cell part+++membrane part+++protein-containing complex+++cell+++organelle+++supramolecular complex+++organelle part+++cell junction+++synapse+++synapse part	0.403102	1.69409e-63	4.25146e-61
298521	Grik3	mRNA	GO:0005886///plasma membrane+++GO:0005887///integral component of plasma membrane+++GO:0016020///membrane+++GO:0016021///integral component of membrane+++GO:0030054///cell junction+++GO:0030424///axon+++GO:0030425///dendrite+++GO:0032839///dendrite cytoplasm+++GO:0032983///kainate selective glutamate receptor complex+++GO:0042734///presynaptic membrane+++GO:0043195///terminal bouton+++GO:0043204/…	cellular_component	membrane+++cell part+++cell+++membrane part+++cell junction+++protein-containing complex+++synapse+++synapse part+++organelle+++organelle part	0.458586	2.00012e-08	2.44934e-07
302473	Slitrk4	mRNA	GO:0098978///glutamatergic synapse	cellular_component	synapse	0.325103	2.20052e-06	1.90878e-05
313633	Ephb2	mRNA	GO:0005575///cellular_component+++GO:0005654///nucleoplasm+++GO:0005886///plasma membrane+++GO:0005887///integral component of plasma membrane+++GO:0030424///axon+++GO:0030425///dendrite+++GO:0043025///neuronal cell body+++GO:0043235///receptor complex+++GO:0098978///glutamatergic synapse+++GO:0099055///integral component of postsynaptic membrane+++GO:0099056///integral component of presynaptic m…	cellular_component	cellular_component+++membrane-enclosed lumen+++organelle+++cell part+++cell+++organelle part+++membrane+++membrane part+++protein-containing complex+++synapse+++synapse part	0.400926	3.28317e-07	3.3121e-06
315311	Slc4a8	mRNA	GO:0005623///cell+++GO:0005886///plasma membrane+++GO:0008021///synaptic vesicle+++GO:0016020///membrane+++GO:0016021///integral component of membrane+++GO:0030425///dendrite+++GO:0032279///asymmetric synapse+++GO:0032280///symmetric synapse+++GO:0032809///neuronal cell body membrane+++GO:0042734///presynaptic membrane+++GO:0043005///neuron projection+++GO:0043195///terminal bouton+++GO:0043679//…	cellular_component	cell+++membrane+++cell part+++organelle+++synapse+++synapse part+++membrane part	0.413514	2.87135e-23	1.40275e-21
315840	Myo6	mRNA	GO:0001726///ruffle+++GO:0005634///nucleus+++GO:0005654///nucleoplasm+++GO:0005737///cytoplasm+++GO:0005794///Golgi apparatus+++GO:0005884///actin filament+++GO:0005886///plasma membrane+++GO:0005902///microvillus+++GO:0005903///brush border+++GO:0005905///clathrin-coated pit+++GO:0005938///cell cortex+++GO:0012506///vesicle membrane+++GO:0014069///postsynaptic density+++GO:0015629///actin cytosk…	cellular_component	cell part+++cell+++organelle+++membrane-enclosed lumen+++organelle part+++supramolecular complex+++membrane+++membrane part+++synapse+++synapse part+++protein-containing complex	0.422259	4.92073e-91	2.31148e-88
362263	Ptprt	mRNA	GO:0005575///cellular_component+++GO:0005886///plasma membrane+++GO:0005887///integral component of plasma membrane+++GO:0009986///cell surface+++GO:0016020///membrane+++GO:0016021///integral component of membrane+++GO:0098978///glutamatergic synapse+++GO:0099061///integral component of postsynaptic density membrane	cellular_component	cellular_component+++membrane+++cell part+++cell+++membrane part+++synapse+++organelle+++organelle part+++synapse part	0.348735	9.84814e-49	1.64016e-46
50592	Gria1	mRNA	GO:0005768///endosome+++GO:0005769///early endosome+++GO:0005783///endoplasmic reticulum+++GO:0005789///endoplasmic reticulum membrane+++GO:0005829///cytosol+++GO:0005886///plasma membrane+++GO:0005911///cell-cell junction+++GO:0008021///synaptic vesicle+++GO:0008328///ionotropic glutamate receptor complex+++GO:0009986///cell surface+++GO:0014069///postsynaptic density+++GO:0016020///membrane+++G…	cellular_component	organelle+++cell part+++cell+++membrane+++membrane part+++organelle part+++cell junction+++synapse+++synapse part+++protein-containing complex+++extracellular region	0.388484	5.20056e-16	1.38279e-14
56768	Pclo	mRNA	GO:0005798///Golgi-associated vesicle+++GO:0005802///trans-Golgi network+++GO:0014069///postsynaptic density+++GO:0030054///cell junction+++GO:0030133///transport vesicle+++GO:0030424///axon+++GO:0030425///dendrite+++GO:0030426///growth cone+++GO:0031594///neuromuscular junction+++GO:0042995///cell projection+++GO:0043005///neuron projection+++GO:0043025///neuronal cell body+++GO:0043195///termin…	cellular_component	organelle+++cell part+++cell+++organelle part+++synapse+++synapse part+++cell junction	0.400091	1.15128e-46	1.71475e-44
59322	Cnksr2	mRNA	GO:0005737///cytoplasm+++GO:0005886///plasma membrane+++GO:0014069///postsynaptic density+++GO:0016020///membrane+++GO:0043005///neuron projection+++GO:0043025///neuronal cell body+++GO:0045211///postsynaptic membrane+++GO:0098978///glutamatergic synapse+++GO:0099147///extrinsic component of postsynaptic density membrane	cellular_component	cell part+++cell+++membrane+++organelle+++synapse+++synapse part+++membrane part+++organelle part	0.360762	2.81058e-07	2.8862e-06
60565	Syt6	mRNA	GO:0005737///cytoplasm+++GO:0005829///cytosol+++GO:0005886///plasma membrane+++GO:0016020///membrane+++GO:0016021///integral component of membrane+++GO:0019898///extrinsic component of membrane+++GO:0030054///cell junction+++GO:0030672///synaptic vesicle membrane+++GO:0031410///cytoplasmic vesicle+++GO:0045202///synapse+++GO:0070382///exocytic vesicle+++GO:0097038///perinuclear endoplasmic reticu…	cellular_component	cell part+++cell+++membrane+++membrane part+++cell junction+++organelle+++organelle part+++synapse+++synapse part	0.327714	6.01429e-05	0.000394352
60590	Grm8	mRNA	GO:0005886///plasma membrane+++GO:0005887///integral component of plasma membrane+++GO:0016020///membrane+++GO:0016021///integral component of membrane+++GO:0042734///presynaptic membrane+++GO:0043005///neuron projection+++GO:0043025///neuronal cell body+++GO:0045211///postsynaptic membrane+++GO:0098978///glutamatergic synapse+++GO:0098982///GABA-ergic synapse+++GO:0099059///integral component of…	cellular_component	membrane+++cell part+++cell+++membrane part+++synapse+++synapse part	0.375067	6.43594e-05	0.000419148
65025	Rims3	mRNA	GO:0016020///membrane+++GO:0030054///cell junction+++GO:0042734///presynaptic membrane+++GO:0045202///synapse+++GO:0048788///cytoskeleton of presynaptic active zone+++GO:0098831///presynaptic active zone cytoplasmic component+++GO:0098978///glutamatergic synapse+++GO:0099524///postsynaptic cytosol	cellular_component	membrane+++cell junction+++cell part+++membrane part+++cell+++synapse+++synapse part+++organelle	0.361199	2.49599e-10	3.95901e-09
81645	Chrm2	mRNA	GO:0005886///plasma membrane+++GO:0005887///integral component of plasma membrane+++GO:0016020///membrane+++GO:0016021///integral component of membrane+++GO:0030054///cell junction+++GO:0030425///dendrite+++GO:0032279///asymmetric synapse+++GO:0032280///symmetric synapse+++GO:0043025///neuronal cell body+++GO:0043679///axon terminus+++GO:0045202///synapse+++GO:0045211///postsynaptic membrane+++GO…	cellular_component	membrane+++cell part+++cell+++membrane part+++cell junction+++synapse+++synapse part	0.322306	8.69003e-07	8.11424e-06
81672	Grm7	mRNA	GO:0005791///rough endoplasmic reticulum+++GO:0005794///Golgi apparatus+++GO:0005886///plasma membrane+++GO:0005887///integral component of plasma membrane+++GO:0005938///cell cortex+++GO:0009986///cell surface+++GO:0016020///membrane+++GO:0016021///integral component of membrane+++GO:0030424///axon+++GO:0030425///dendrite+++GO:0032279///asymmetric synapse+++GO:0032991///protein-containing comple…	cellular_component	organelle+++cell part+++cell+++membrane+++membrane part+++synapse+++protein-containing complex+++synapse part	0.39857	1.50406e-17	4.57713e-16
83731	Kcnma1	mRNA	GO:0005623///cell+++GO:0005737///cytoplasm+++GO:0005739///mitochondrion+++GO:0005783///endoplasmic reticulum+++GO:0005789///endoplasmic reticulum membrane+++GO:0005886///plasma membrane+++GO:0005901///caveola+++GO:0008076///voltage-gated potassium channel complex+++GO:0009897///external side of plasma membrane+++GO:0016020///membrane+++GO:0016021///integral component of membrane+++GO:0016324///ap…	cellular_component	cell+++cell part+++organelle+++membrane+++membrane part+++organelle part+++protein-containing complex+++synapse+++synapse part	0.348082	3.89481e-10	5.99101e-09
84408	Cdh8	mRNA	GO:0005886///plasma membrane+++GO:0005887///integral component of plasma membrane+++GO:0005912///adherens junction+++GO:0009986///cell surface+++GO:0016020///membrane+++GO:0016021///integral component of membrane+++GO:0016342///catenin complex+++GO:0043083///synaptic cleft+++GO:0043679///axon terminus+++GO:0097060///synaptic membrane+++GO:0098978///glutamatergic synapse	cellular_component	membrane+++cell part+++cell+++membrane part+++cell junction+++protein-containing complex+++extracellular region+++synapse+++synapse part	0.374713	2.27196e-11	4.04099e-10
neuronal cell body
Gene ID	Gene Symbol	Type	GO_C Term	GO_C Term Level1	GO_C Term Level2	log2 (SMIR_SCDH / Con_SCDH)	Pvalue(SMIR_SCDH / Con_SCDH)	Qvalue (SMIR_SCDH / Con_SCDH)
100911625	LOC100911625	mRNA	GO:0000015///phosphopyruvate hydratase complex+++GO:0001917///photoreceptor inner segment+++GO:0005737///cytoplasm+++GO:0009986///cell surface+++GO:0016020///membrane+++GO:0030426///growth cone+++GO:0043005///neuron projection+++GO:0043025///neuronal cell body+++GO:0043204///perikaryon+++GO:0045121///membrane raft+++GO:0097060///synaptic membrane+++GO:0099738///cell cortex region	cellular_component	cell part+++protein-containing complex+++cell+++membrane+++membrane part+++synapse+++synapse part	1.36093	4.01127e-99	2.16136e-96
103694905	LOC103694905	mRNA	GO:0005791///rough endoplasmic reticulum+++GO:0005887///integral component of plasma membrane+++GO:0008021///synaptic vesicle+++GO:0016020///membrane+++GO:0016021///integral component of membrane+++GO:0030425///dendrite+++GO:0043025///neuronal cell body+++GO:0043679///axon terminus+++GO:0045202///synapse+++GO:0099055///integral component of postsynaptic membrane+++GO:0099056///integral component …	cellular_component	organelle+++cell part+++cell+++membrane+++membrane part+++synapse+++synapse part	1.09459	1.34428e-16	3.78881e-15
108348118	LOC108348118	mRNA	GO:0005737///cytoplasm+++GO:0005886///plasma membrane+++GO:0005887///integral component of plasma membrane+++GO:0009986///cell surface+++GO:0016020///membrane+++GO:0016021///integral component of membrane+++GO:0030659///cytoplasmic vesicle membrane+++GO:0031982///vesicle+++GO:0032593///insulin-responsive compartment+++GO:0043025///neuronal cell body+++GO:0043229///intracellular organelle+++GO:004…	cellular_component	cell part+++cell+++membrane+++membrane part+++organelle+++organelle part	0.985185	1.60599e-34	1.50111e-32
116671	Cdk5r1	mRNA	GO:0005634///nucleus+++GO:0005654///nucleoplasm+++GO:0005737///cytoplasm+++GO:0005886///plasma membrane+++GO:0014069///postsynaptic density+++GO:0016020///membrane+++GO:0016533///protein kinase 5 complex+++GO:0030424///axon+++GO:0030425///dendrite+++GO:0030426///growth cone+++GO:0031594///neuromuscular junction+++GO:0042995///cell projection+++GO:0043005///neuron projection+++GO:0043025///neurona…	cellular_component	organelle+++cell part+++cell+++membrane-enclosed lumen+++organelle part+++membrane+++synapse+++synapse part+++protein-containing complex+++supramolecular complex	0.3564	1.59396e-11	2.87698e-10
140933	Trpc5	mRNA	GO:0005623///cell+++GO:0005737///cytoplasm+++GO:0005887///integral component of plasma membrane+++GO:0016020///membrane+++GO:0016021///integral component of membrane+++GO:0030425///dendrite+++GO:0030426///growth cone+++GO:0034703///cation channel complex+++GO:0034704///calcium channel complex+++GO:0043025///neuronal cell body+++GO:0045121///membrane raft	cellular_component	cell+++cell part+++membrane+++membrane part+++protein-containing complex	0.453465	2.34286e-14	5.49567e-13
171026	Akap5	mRNA	GO:0005623///cell+++GO:0005737///cytoplasm+++GO:0005856///cytoskeleton+++GO:0005886///plasma membrane+++GO:0009898///cytoplasmic side of plasma membrane+++GO:0014069///postsynaptic density+++GO:0016020///membrane+++GO:0016323///basolateral plasma membrane+++GO:0030425///dendrite+++GO:0031527///filopodium membrane+++GO:0032279///asymmetric synapse+++GO:0032590///dendrite membrane+++GO:0032591///de…	cellular_component	cell+++cell part+++organelle+++membrane+++membrane part+++synapse+++synapse part+++protein-containing complex+++organelle part	0.378537	5.33327e-06	4.32326e-05
24590	Mme	mRNA	GO:0005737///cytoplasm+++GO:0005769///early endosome+++GO:0005802///trans-Golgi network+++GO:0005886///plasma membrane+++GO:0005903///brush border+++GO:0008021///synaptic vesicle+++GO:0016020///membrane+++GO:0016021///integral component of membrane+++GO:0030424///axon+++GO:0030425///dendrite+++GO:0031410///cytoplasmic vesicle+++GO:0043025///neuronal cell body+++GO:0044306///neuron projection term…	cellular_component	cell part+++cell+++organelle+++organelle part+++membrane+++synapse+++synapse part+++membrane part	0.383545	0.000117125	0.000717396
25111	Chrm4	mRNA	GO:0005737///cytoplasm+++GO:0005886///plasma membrane+++GO:0005887///integral component of plasma membrane+++GO:0014069///postsynaptic density+++GO:0016020///membrane+++GO:0016021///integral component of membrane+++GO:0030054///cell junction+++GO:0030425///dendrite+++GO:0032279///asymmetric synapse+++GO:0042383///sarcolemma+++GO:0043025///neuronal cell body+++GO:0043679///axon terminus+++GO:00452…	cellular_component	cell part+++cell+++membrane+++membrane part+++organelle+++synapse+++synapse part+++cell junction+++organelle part	0.495088	1.68394e-05	0.000124344
25132	Myo5b	mRNA	GO:0005737///cytoplasm+++GO:0005903///brush border+++GO:0015629///actin cytoskeleton+++GO:0016459///myosin complex+++GO:0031982///vesicle+++GO:0032991///protein-containing complex+++GO:0043005///neuron projection+++GO:0043025///neuronal cell body+++GO:0043197///dendritic spine+++GO:0045179///apical cortex+++GO:0048471///perinuclear region of cytoplasm+++GO:0055037///recycling endosome+++GO:009868…	cellular_component	cell part+++cell+++organelle+++protein-containing complex+++organelle part+++synapse+++synapse part+++membrane	0.378253	4.36308e-09	5.88166e-08
25204	Pcsk1	mRNA	GO:0005615///extracellular space+++GO:0005791///rough endoplasmic reticulum+++GO:0005802///trans-Golgi network+++GO:0016020///membrane+++GO:0016021///integral component of membrane+++GO:0030133///transport vesicle+++GO:0030141///secretory granule+++GO:0030425///dendrite+++GO:0031410///cytoplasmic vesicle+++GO:0034774///secretory granule lumen+++GO:0043005///neuron projection+++GO:0043025///neuron…	cellular_component	extracellular region part+++extracellular region+++organelle+++cell part+++cell+++organelle part+++membrane+++membrane part+++membrane-enclosed lumen+++synapse+++synapse part	0.471641	8.55489e-06	6.67201e-05
25400	Camk2a	mRNA	GO:0005634///nucleus+++GO:0005737///cytoplasm+++GO:0005739///mitochondrion+++GO:0005829///cytosol+++GO:0005954///calcium- and calmodulin-dependent protein kinase complex+++GO:0014069///postsynaptic density+++GO:0016020///membrane+++GO:0030054///cell junction+++GO:0030424///axon+++GO:0030425///dendrite+++GO:0032839///dendrite cytoplasm+++GO:0042995///cell projection+++GO:0043005///neuron projectio…	cellular_component	organelle+++cell part+++cell+++protein-containing complex+++synapse+++synapse part+++membrane+++cell junction+++membrane part+++organelle part	0.347121	1.35563e-19	4.99701e-18
257648	Cacna1b	mRNA	GO:0005886///plasma membrane+++GO:0005891///voltage-gated calcium channel complex+++GO:0016020///membrane+++GO:0016021///integral component of membrane+++GO:0016323///basolateral plasma membrane+++GO:0030425///dendrite+++GO:0032991///protein-containing complex+++GO:0043005///neuron projection+++GO:0043025///neuronal cell body+++GO:0043198///dendritic shaft+++GO:0043679///axon terminus+++GO:004430…	cellular_component	membrane+++cell part+++cell+++membrane part+++protein-containing complex+++synapse+++synapse part+++organelle+++organelle part	0.341829	3.62085e-30	2.66401e-28
259269	Erc2	mRNA	GO:0005737///cytoplasm+++GO:0005783///endoplasmic reticulum+++GO:0005798///Golgi-associated vesicle+++GO:0005856///cytoskeleton+++GO:0014069///postsynaptic density+++GO:0016020///membrane+++GO:0030054///cell junction+++GO:0030426///growth cone+++GO:0032991///protein-containing complex+++GO:0042734///presynaptic membrane+++GO:0042995///cell projection+++GO:0043025///neuronal cell body+++GO:0043195…	cellular_component	cell part+++cell+++organelle+++synapse+++synapse part+++membrane+++cell junction+++protein-containing complex+++membrane part	0.347443	6.13072e-08	6.9891e-07
266715	Fzd3	mRNA	GO:0005575///cellular_component+++GO:0005737///cytoplasm+++GO:0005886///plasma membrane+++GO:0016020///membrane+++GO:0016021///integral component of membrane+++GO:0016324///apical plasma membrane+++GO:0016328///lateral plasma membrane+++GO:0030424///axon+++GO:0030425///dendrite+++GO:0032433///filopodium tip+++GO:0043025///neuronal cell body+++GO:0045177///apical part of cell+++GO:0048786///presyn…	cellular_component	cellular_component+++cell part+++cell+++membrane+++membrane part+++synapse+++synapse part	0.496734	6.96877e-09	9.11914e-08
29190	Pdyn	mRNA	GO:0005576///extracellular region+++GO:0005737///cytoplasm+++GO:0005886///plasma membrane+++GO:0008021///synaptic vesicle+++GO:0030425///dendrite+++GO:0043025///neuronal cell body+++GO:0043679///axon terminus+++GO:0099013///neuronal dense core vesicle lumen	cellular_component	extracellular region+++cell part+++cell+++membrane+++organelle+++synapse+++synapse part+++membrane-enclosed lumen+++organelle part	0.396801	7.52772e-15	1.84616e-13
29335	Oprk1	mRNA	GO:0005623///cell+++GO:0005654///nucleoplasm+++GO:0005829///cytosol+++GO:0005886///plasma membrane+++GO:0005887///integral component of plasma membrane+++GO:0016020///membrane+++GO:0016021///integral component of membrane+++GO:0030285///integral component of synaptic vesicle membrane+++GO:0030425///dendrite+++GO:0043005///neuron projection+++GO:0043025///neuronal cell body+++GO:0043204///perikary…	cellular_component	cell+++membrane-enclosed lumen+++organelle+++cell part+++organelle part+++membrane+++membrane part+++synapse+++synapse part	0.387418	4.81282e-06	3.93444e-05
294674	Enc1	mRNA	GO:0000790///nuclear chromatin+++GO:0005634///nucleus+++GO:0005654///nucleoplasm+++GO:0005730///nucleolus+++GO:0005737///cytoplasm+++GO:0016363///nuclear matrix+++GO:0031463///Cul3-RING ubiquitin ligase complex+++GO:0043025///neuronal cell body	cellular_component	membrane-enclosed lumen+++organelle+++cell part+++cell+++organelle part+++protein-containing complex	0.349388	4.29171e-20	1.64486e-18
29559	Grik1	mRNA	GO:0005886///plasma membrane+++GO:0008328///ionotropic glutamate receptor complex+++GO:0014069///postsynaptic density+++GO:0016020///membrane+++GO:0016021///integral component of membrane+++GO:0030054///cell junction+++GO:0030425///dendrite+++GO:0032983///kainate selective glutamate receptor complex+++GO:0042734///presynaptic membrane+++GO:0043025///neuronal cell body+++GO:0043195///terminal bout…	cellular_component	membrane+++cell part+++cell+++membrane part+++protein-containing complex+++organelle+++synapse+++synapse part+++cell junction+++organelle part	0.339395	6.15367e-06	4.92079e-05
29647	Cask	mRNA	GO:0005604///basement membrane+++GO:0005634///nucleus+++GO:0005652///nuclear lamina+++GO:0005730///nucleolus+++GO:0005737///cytoplasm+++GO:0005829///cytosol+++GO:0005886///plasma membrane+++GO:0005911///cell-cell junction+++GO:0014069///postsynaptic density+++GO:0016020///membrane+++GO:0016021///integral component of membrane+++GO:0016323///basolateral plasma membrane+++GO:0016363///nuclear matri…	cellular_component	extracellular region part+++extracellular region+++organelle+++cell part+++cell+++membrane-enclosed lumen+++organelle part+++membrane+++cell junction+++synapse+++synapse part+++membrane part+++protein-containing complex	0.322415	2.99834e-08	3.56454e-07
29710	Scn8a	mRNA	GO:0001518///voltage-gated sodium channel complex+++GO:0005886///plasma membrane+++GO:0016020///membrane+++GO:0016021///integral component of membrane+++GO:0030018///Z disc+++GO:0030054///cell junction+++GO:0030424///axon+++GO:0030425///dendrite+++GO:0033268///node of Ranvier+++GO:0034706///sodium channel complex+++GO:0042995///cell projection+++GO:0043025///neuronal cell body+++GO:0043194///axon…	cellular_component	membrane+++cell part+++membrane part+++protein-containing complex+++cell+++organelle+++supramolecular complex+++organelle part+++cell junction+++synapse+++synapse part	0.403102	1.69409e-63	4.25146e-61
29717	Cacna1g	mRNA	GO:0001518///voltage-gated sodium channel complex+++GO:0005623///cell+++GO:0005737///cytoplasm+++GO:0005886///plasma membrane+++GO:0005891///voltage-gated calcium channel complex+++GO:0016020///membrane+++GO:0016021///integral component of membrane+++GO:0030425///dendrite+++GO:0043005///neuron projection+++GO:0043025///neuronal cell body+++GO:0044297///cell body+++GO:0045202///synapse+++GO:004847…	cellular_component	membrane+++cell part+++membrane part+++protein-containing complex+++cell+++synapse	0.358351	2.43869e-44	3.21416e-42
309650	Cpne5	mRNA	GO:0005886///plasma membrane+++GO:0043005///neuron projection+++GO:0043025///neuronal cell body	cellular_component	membrane+++cell part+++cell	0.366431	1.61886e-24	8.74852e-23
313633	Ephb2	mRNA	GO:0005575///cellular_component+++GO:0005654///nucleoplasm+++GO:0005886///plasma membrane+++GO:0005887///integral component of plasma membrane+++GO:0030424///axon+++GO:0030425///dendrite+++GO:0043025///neuronal cell body+++GO:0043235///receptor complex+++GO:0098978///glutamatergic synapse+++GO:0099055///integral component of postsynaptic membrane+++GO:0099056///integral component of presynaptic m…	cellular_component	cellular_component+++membrane-enclosed lumen+++organelle+++cell part+++cell+++organelle part+++membrane+++membrane part+++protein-containing complex+++synapse+++synapse part	0.400926	3.28317e-07	3.3121e-06
315510	Igsf9b	mRNA	GO:0005886///plasma membrane+++GO:0014069///postsynaptic density+++GO:0016020///membrane+++GO:0016021///integral component of membrane+++GO:0030054///cell junction+++GO:0030425///dendrite+++GO:0043005///neuron projection+++GO:0043025///neuronal cell body+++GO:0045202///synapse+++GO:0045211///postsynaptic membrane+++GO:0060077///inhibitory synapse+++GO:0098982///GABA-ergic synapse+++GO:0099629///p…	cellular_component	membrane+++cell part+++cell+++organelle+++synapse+++synapse part+++membrane part+++cell junction	0.53644	2.09081e-13	4.46951e-12
[truncated: 562 more rows]

## Sheet: Suppl. Table 4
Suppl. Table 4 The DEGs in KEGG analysis
[truncated: 248 more rows]

## Sheet: Suppl. Table 5
Suppl. Table 5 The list of human pain genes and overlapped DEGs
[truncated: 743 more rows]
